# Supplementary material for: Genetic analysis reveals functions of atypical polyubiquitin chains
Source: eLife journal article supplement (doi:10.7554/elife.42955), 2018-12-14
Supplement: supp [file elife-42955-supp-v1.zip]

Archive with 14 entries (14 files):
- elife_poa_e42955_Supplementary_file_4.xlsx
- elife_poa_e42955_Transparent_Reporting_File.docx
- elife_poa_e42955_Figure_1_figure_supplement_3.pdf
- elife_poa_e42955_Figure_1_figure_supplement_4.pdf
- elife_poa_e42955_Supplementary_file_1.xlsx
- elife_poa_e42955_Figure_3_figure_supplement_1.pdf
- elife_poa_e42955_Figure_1_figure_supplement_5.pdf
- elife_poa_e42955_Figure_1_figure_supplement_6.pdf
- elife_poa_e42955_Figure_1_figure_supplement_1.pdf
- elife_poa_e42955_Supplementary_file_3.xlsx
- elife_poa_e42955_Supplementary_file_2.xlsx
- elife_poa_e42955_Figure_4_figure_supplement_1.pdf
- elife_poa_e42955_Figure_1_figure_supplement_2.pdf
- elife_poa_e42955_Supplementary_file_5.xlsx
