# Supplementary material for: Genetic analysis reveals functions of atypical polyubiquitin chains
Source: eLife journal article supplement (doi:10.7554/elife.42955), 2018-12-14

Figure 1-figure supplement 3

**A** *ubi2Δ::* HYG<sup>R</sup> GPDpr-L40A GPDpr-L40A

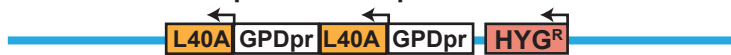

*ubi3Δ::* URA3 GPDpr-3XUb-S31-Cyc1tr GPDpr-S31

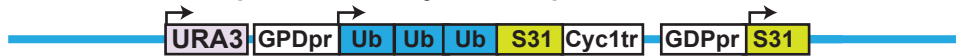

*ubi4Δ::* NAT<sup>R</sup>

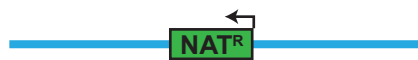

**B**

*ubi2Δ::* HYG<sup>R</sup> GPDpr-L40A GPDpr-L40A

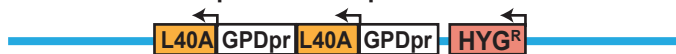

*ubi3Δ::* URA3 GPDpr-2XUb\*-Ub-S31-Cyc1tr GPDpr-S31

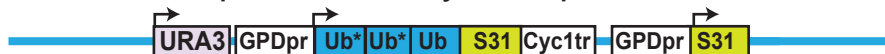

*ubi4Δ::* Cyc1tr-Ub\*-GPDpr Cyc1tr-Ub\*-GPDpr NAT<sup>R</sup>

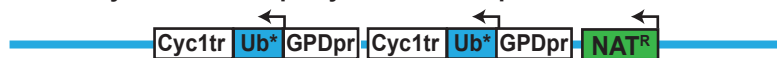

Supplement: supp [file elife-42955-supp-v1.zip › elife_poa_e42955_Figure_1_figure_supplement_3.pdf]
