# Supplementary material for: Genetic analysis reveals functions of atypical polyubiquitin chains
Source: eLife journal article supplement (doi:10.7554/elife.42955), 2018-12-14

Figure 1-figure supplement 4

17 K-to-R Ub strains

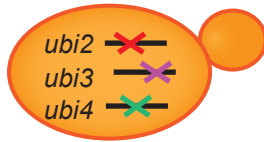

**MAT  $\alpha$ ; *his3*; *ura3*; *CAN1*;**  
*ubi1 $\Delta$ :: GPDpr-L40A;*  
*ubi2 $\Delta$ :: HYG<sup>R</sup> GPDpr-L40A GPDpr-L40A;*  
*ubi3 $\Delta$ :: URA3 GPDpr-3XUb\*-S31-Cyc1tr GPDpr-S31;*  
*ubi4 $\Delta$ :: GPDpr-Ub\*-Cyc1tr-GPDpr-Ub\*-Cyc1tr NAT<sup>R</sup>;*  
**XXX**

Haploid SK1 gene deletion library  
2655 gene knock outs

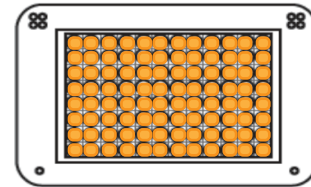

**MAT a; *his3*; *ura3*; *can1 $\Delta$ ::STE2pr-SpHIS5*;**  
*ubi1 $\Delta$ :: GPDpr-L40A;*  
**UBI2;**  
**UBI3;**  
**UBI4;**  
**xxx::KAN<sup>R</sup>**

X

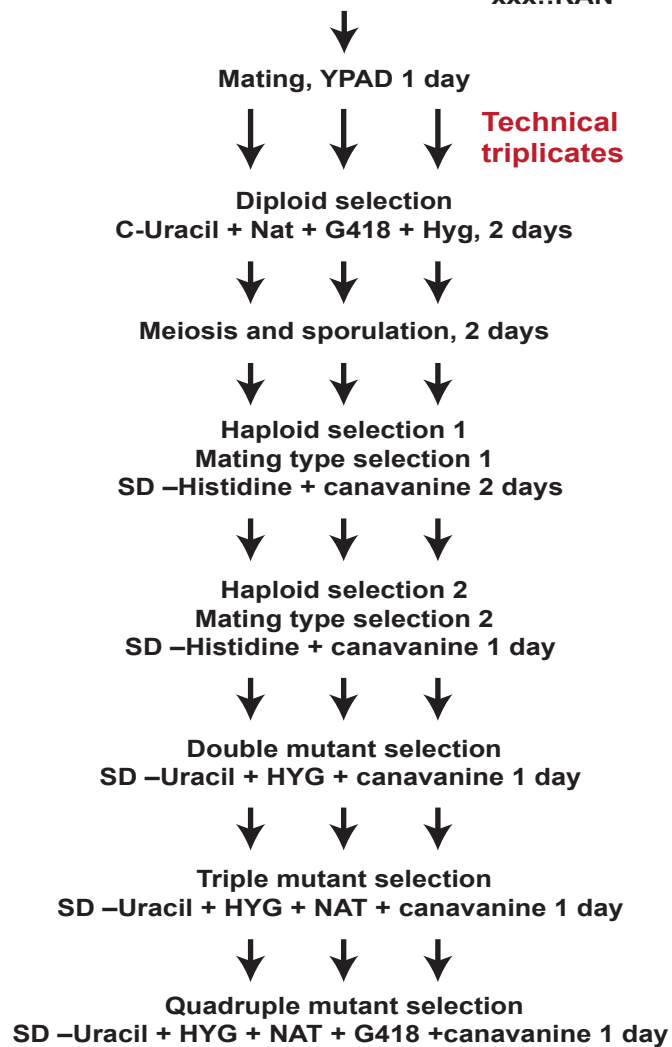

Supplement: supp [file elife-42955-supp-v1.zip › elife_poa_e42955_Figure_1_figure_supplement_4.pdf]
