# Supplementary material for: Genetic analysis reveals functions of atypical polyubiquitin chains
Source: eLife journal article supplement (doi:10.7554/elife.42955), 2018-12-14

**Figure 1-figure supplement 6**

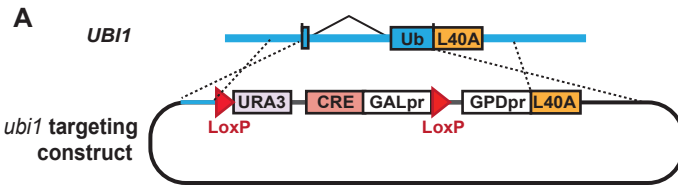

*ubi1* $\Delta$ :: LoxP URA3 CRE-GALpr LoxP GPDpr-L40A

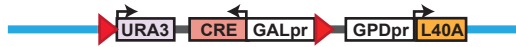

*ubi1* $\Delta$ :: LoxP GPDpr L40A

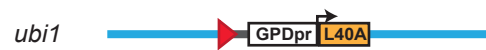

**B**

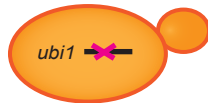

**X**

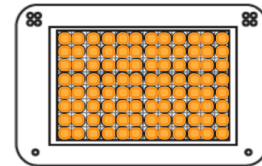

**MAT $\alpha$ ; *his3*; *ura3*; *CAN1*;  
*ubi1* $\Delta$ :: LoxP URA3 CRE-GALpr LoxP GPDpr-L40A;  
XXX**

**MAT a *his3*; *ura3*; *can1* $\Delta$ ::STE2pr-SpHIS5;  
UBI1;  
xxx::KAN<sup>R</sup>**

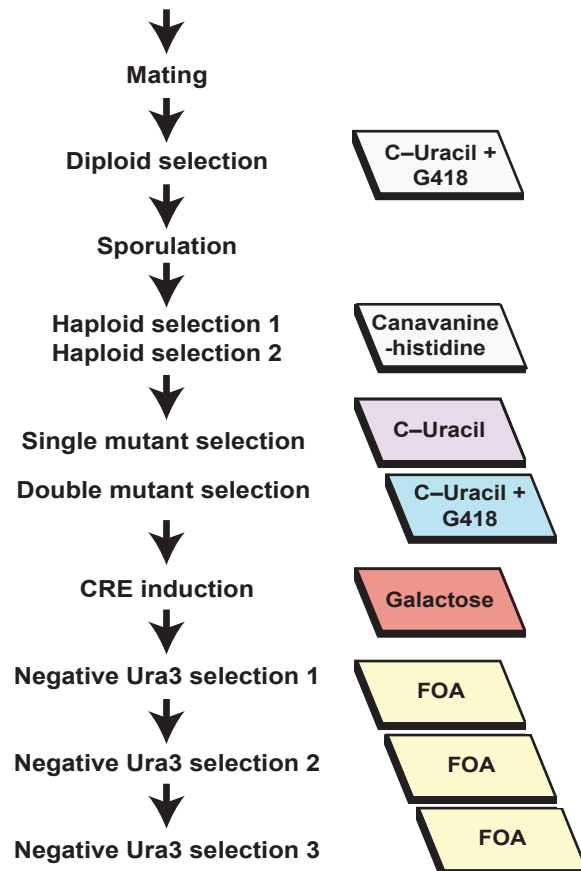

Supplement: supp [file elife-42955-supp-v1.zip › elife_poa_e42955_Figure_1_figure_supplement_6.pdf]
