# Supplementary material for: Genetic analysis reveals functions of atypical polyubiquitin chains
Source: eLife journal article supplement (doi:10.7554/elife.42955), 2018-12-14
Supplement: supp [file elife-42955-supp-v1.zip › elife_poa_e42955_Supplementary_file_1.xlsx]

## Sheet: Sheet1
Supplementary file 1
Plasmids
Name	Description
DS199	Ubi1 targeting construct
DS200	Ubi2 targeting construct
DS203	WT Ub Ubi3 targeting construct
DS204	K6R Ub Ubi3 targeting construct
DS205	K11R Ub Ubi3 targeting construct
DS206	K27R Ub Ubi3 targeting construct
DS207	K29R Ub Ubi3 targeting construct
DS208	K33R Ub Ubi3 targeting construct
DS209	K48R Ub Ubi3 targeting construct
DS210	K6R K11R Ub Ubi3 targeting construct
DS211	K6R K29R Ub Ubi3 targeting construct
DS212	K11R K29R Ub Ubi3 targeting construct
DS213	K11R K33R Ub Ubi3 targeting construct
DS214	K27R K33R Ub Ubi3 targeting construct
DS215	K29R K33R Ub Ubi3 targeting construct
DS216	K11R K48R Ub Ubi3 targeting construct
DS217	K29R K48R Ub Ubi3 targeting construct
DS218	K11R K27R K29R Ub Ubi3 targeting construct
DS219	WT Ub Ubi4 targeting construct
DS220	K6R Ub Ubi4 targeting construct
DS221	K11R Ub Ubi4 targeting construct
DS222	K27R Ub Ubi4 targeting construct
DS223	K29R Ub Ubi4 targeting construct
DS224	K33R Ub Ubi4 targeting construct
DS225	K48R Ub Ubi4 targeting construct
DS226	K6R K11R Ub Ubi4 targeting construct
DS227	K6R K29R Ub Ubi4 targeting construct
DS228	K11R K29R Ub Ubi4 targeting construct
DS229	K11R K33R Ub Ubi4 targeting construct
DS230	K27R K33R Ub Ubi4 targeting construct
DS231	K29R K33R Ub Ubi4 targeting construct
DS232	K11R K48R Ub Ubi4 targeting construct
DS233	K29R K48R Ub Ubi4 targeting construct
DS234	K11R K27R K29R Ub Ubi4 targeting construct
DS235	Ubi4 targeting construct with no Ubiquitin
FMGp33	Prs413-Galpr-Clb2-6xHis-3xFlag
FMGp41	Hsl1 (667-872) in vitro translation construct
FMGp42	Hsl1-3K (667-872) in vitro translation construct
