# Supplementary material for: Genetic analysis reveals functions of atypical polyubiquitin chains
Source: eLife journal article supplement (doi:10.7554/elife.42955), 2018-12-14
Supplement: supp [file elife-42955-supp-v1.zip › elife_poa_e42955_Supplementary_file_2.xlsx]

## Sheet: Sheet1
Supplementary file 2
Strains
Strain ID	#	Description	Genotype
DS	368	WT ubiquitin SGA strain	his3; ura3; ubi1∆:: GPDpr-L40A; ubi2∆:: HYGR GPDpr-L40A GPDpr-L40A; ubi3∆:: URA3 GPDpr-3xUb-S31-Cyc1tr GPDpr-S31; ubi4∆:: 2X (Cyc1tr-Ub-GDPpr) NATR; MAT α
DS	369	K6R ubiquitin SGA strain	his3; ura3; ubi1∆:: GPDpr-L40A; ubi2∆:: HYGR GPDpr-L40A GPDpr-L40A; ubi3∆:: URA3 GPDpr-3xUb(K6R)-S31-Cyc1tr GPDpr-S31; ubi4∆:: 2X (Cyc1tr-Ub(K6R)-GDPpr) NATR; MAT α
DS	370	K11R ubiquitin SGA strain	his3; ura3; ubi1∆:: GPDpr-L40A; ubi2∆:: HYGR GPDpr-L40A GPDpr-L40A; ubi3∆:: URA3 GPDpr-3xUb(K11R)-S31-Cyc1tr GPDpr-S31; ubi4∆:: 2X (Cyc1tr-Ub(K11R)-GDPpr) NATR; MAT α
DS	371	K27R ubiquitin SGA strain	his3; ura3; ubi1∆:: GPDpr-L40A; ubi2∆:: HYGR GPDpr-L40A GPDpr-L40A; ubi3∆:: URA3 GPDpr-3xUb(K27R)-S31-Cyc1tr GPDpr-S31; ubi4∆:: 2X (Cyc1tr-Ub(K27R)-GDPpr) NATR; MAT α
DS	372	K29R ubiquitin SGA strain	his3; ura3; ubi1∆:: GPDpr-L40A; ubi2∆:: HYGR GPDpr-L40A GPDpr-L40A; ubi3∆:: URA3 GPDpr-3xUb(K29R)-S31-Cyc1tr GPDpr-S31; ubi4∆:: 2X (Cyc1tr-Ub(K29R)-GDPpr) NATR; MAT α
DS	373	K33R ubiquitin SGA strain	his3; ura3; ubi1∆:: GPDpr-L40A; ubi2∆:: HYGR GPDpr-L40A GPDpr-L40A; ubi3∆:: URA3 GPDpr-3xUb(K33R)-S31-Cyc1tr GPDpr-S31; ubi4∆:: 2X (Cyc1tr-Ub(K33R)-GDPpr) NATR; MAT α
DS	374	K48R ubiquitin SGA strain	his3; ura3; ubi1∆:: GPDpr-L40A; ubi2∆:: HYGR GPDpr-L40A GPDpr-L40A; ubi3∆:: URA3 GPDpr-2XUb(K48R)-Ub-S31-Cyc1tr GPDpr-S31; ubi4∆:: 2X (Cyc1tr-Ub(K48R)-GDPpr) NATR; MAT α
DS	376	K63R ubiquitin SGA strain	his3; ura3; ubi1∆:: GPDpr-L40A; ubi2∆:: HYGR GPDpr-L40A GPDpr-L40A; ubi3∆:: URA3 GPDpr-3xUb(K63R)-S31-Cyc1tr GPDpr-S31; ubi4∆:: 2X (Cyc1tr-Ub(K63R)-GDPpr) NATR; MAT α
DS	377	K6R K11R ubiquitin SGA strain	his3; ura3; ubi1∆:: GPDpr-L40A; ubi2∆:: HYGR GPDpr-L40A GPDpr-L40A; ubi3∆:: URA3 GPDpr-3xUb(K6R,K11R)-S31-Cyc1tr GPDpr-S31; ubi4∆:: 2X (Cyc1tr-Ub(K6R,K11R)-GDPpr) NATR; MAT α
DS	378	K6R K29R ubiquitin SGA strain	his3; ura3; ubi1∆:: GPDpr-L40A; ubi2∆:: HYGR GPDpr-L40A GPDpr-L40A; ubi3∆:: URA3 GPDpr-3xUb(K6R,K29R)-S31-Cyc1tr GPDpr-S31; ubi4∆:: 2X (Cyc1tr-Ub(K6R,K29R)-GDPpr) NATR; MAT α
DS	381	K11R K29R ubiquitin SGA strain	his3; ura3; ubi1∆:: GPDpr-L40A; ubi2∆:: HYGR GPDpr-L40A GPDpr-L40A; ubi3∆:: URA3 GPDpr-3xUb(K11R,K29R)-S31-Cyc1tr GPDpr-S31; ubi4∆:: 2X (Cyc1tr-Ub(K11R,K29R)-GDPpr) NATR; MAT α
DS	382	K11R K33R ubiquitin SGA strain	his3; ura3; ubi1∆:: GPDpr-L40A; ubi2∆:: HYGR GPDpr-L40A GPDpr-L40A; ubi3∆:: URA3 GPDpr-3xUb(K11R,K33R)-S31-Cyc1tr GPDpr-S31; ubi4∆:: 2X (Cyc1tr-Ub(K11R,K33R)-GDPpr) NATR; MAT α
DS	384	WT-lower ubiquitin SGA strain	his3; ura3; ubi1∆:: GPDpr-L40A; ubi2∆:: HYGR GPDpr-L40A GPDpr-L40A; ubi3∆:: URA3 GPDpr-3xUb-S31-Cyc1tr GPDpr-S31; ubi4∆:: NATR; MAT α
DS	389	K29R K33R ubiquitin SGA strain	his3; ura3; ubi1∆:: GPDpr-L40A; ubi2∆:: HYGR GPDpr-L40A GPDpr-L40A; ubi3∆:: URA3 GPDpr-3xUb(K29R,K33R)-S31-Cyc1tr GPDpr-S31; ubi4∆:: 2X (Cyc1tr-Ub(K29R,K33R)-GDPpr) NATR; MAT α
DS	392	K11R K27R K29R ubiquitin SGA strain	his3; ura3; ubi1∆:: GPDpr-L40A; ubi2∆:: HYGR GPDpr-L40A GPDpr-L40A; ubi3∆:: URA3 GPDpr-3xUb(K11R, K27R, K29R)-S31-Cyc1tr GPDpr-S31; ubi4∆:: 2X (Cyc1tr-Ub(K11R, K27R, K29R)-GDPpr) NATR; MAT α
DS	394	K11R K48R ubiquitin SGA strain	his3; ura3; ubi1∆:: GPDpr-L40A; ubi2∆:: HYGR GPDpr-L40A GPDpr-L40A; ubi3∆:: URA3 GPDpr-Ub(K11R,K48R)-2XUb(K11R)-S31-Cyc1tr GPDpr-S31; ubi4∆:: 2X (Cyc1tr-Ub(K11R,K48R)-GDPpr) NATR; MAT α
DS	396	K29R K48R ubiquitin SGA strain	his3; ura3; ubi1∆:: GPDpr-L40A; ubi2∆:: HYGR GPDpr-L40A GPDpr-L40A; ubi3∆:: URA3 GPDpr-Ub(K29R,K48R)-2XUb(K29R)-S31-Cyc1tr GPDpr-S31; ubi4∆:: 2X (Cyc1tr-Ub(K29R,K48R)-GDPpr) NATR; MAT α
DS	397	K27R K33R ubiquitin SGA strain	his3; ura3; ubi1∆:: GPDpr-L40A; ubi2∆:: HYGR GPDpr-L40A GPDpr-L40A; ubi3∆:: URA3 GPDpr-3xUb(K27R,K33R)-S31-Cyc1tr GPDpr-S31; ubi4∆:: 2X (Cyc1tr-Ub(K27R,K33R)-GDPpr) NATR; MAT α
FMGy	91	WT ubiquitin SGA strain_5	his3; ura3; ubi1∆:: GPDpr-L40A; ubi2∆:: HYGR GPDpr-L40A GPDpr-L40A; ubi3∆:: URA3 GPDpr-3xUb-S31-Cyc1tr GPDpr-S31; ubi4∆:: 2X (Cyc1tr-Ub-GDPpr) NATR; MAT a
FMGy	92	K11R ubiquitin SGA strain_5	his3; ura3; ubi1∆:: GPDpr-L40A; ubi2∆:: HYGR GPDpr-L40A GPDpr-L40A; ubi3∆:: URA3 GPDpr-3xUb(K11R)-S31-Cyc1tr GPDpr-S31; ubi4∆:: 2X (Cyc1tr-Ub(K11R)-GDPpr) NATR; MAT a
FMGy	94	hom2Δ K11R ubiquitin SGA strain_2	his3; ura3; ubi1∆:: GPDpr-L40A; ubi2∆:: HYGR GPDpr-L40A GPDpr-L40A; ubi3∆:: URA3 GPDpr-3xUb(K11R)-S31-Cyc1tr GPDpr-S31; ubi4∆:: 2X (Cyc1tr-Ub(K11R)-GDPpr) NATR; hom2Δ::KanR; MAT a
FMGy	95	hom2Δ WT ubiquitin SGA strain_2	his3; ura3; ubi1∆:: GPDpr-L40A; ubi2∆:: HYGR GPDpr-L40A GPDpr-L40A; ubi3∆:: URA3 GPDpr-3xUb-S31-Cyc1tr GPDpr-S31; ubi4∆:: 2X (Cyc1tr-Ub-GDPpr) NATR; hom2Δ::KanR; MAT α
FMGy	98	hom3Δ K11R ubiquitin SGA strain	his3; ura3; ubi1∆:: GPDpr-L40A; ubi2∆:: HYGR GPDpr-L40A GPDpr-L40A; ubi3∆:: URA3 GPDpr-3xUb(K11R)-S31-Cyc1tr GPDpr-S31; ubi4∆:: 2X (Cyc1tr-Ub(K11R)-GDPpr) NATR; hom3Δ::KanR; MAT α
FMGy	99	hom3Δ WT ubiquitin SGA strain	his3; ura3; ubi1∆:: GPDpr-L40A; ubi2∆:: HYGR GPDpr-L40A GPDpr-L40A; ubi3∆:: URA3 GPDpr-3xUb-S31-Cyc1tr GPDpr-S31; ubi4∆:: 2X (Cyc1tr-Ub-GDPpr) NATR; hom3Δ::KanR; MAT a
FMGy	110	K11R ubiquitin SGA strain_1	his3; ura3; ubi1∆:: GPDpr-L40A; ubi2∆:: HYGR GPDpr-L40A GPDpr-L40A; ubi3∆:: URA3 GPDpr-3xUb(K11R)-S31-Cyc1tr GPDpr-S31; ubi4∆:: 2X (Cyc1tr-Ub(K11R)-GDPpr) NATR; MAT α
FMGy	126	K6R ubiquitin SGA strain_1	his3; ura3; ubi1∆:: GPDpr-L40A; ubi2∆:: HYGR GPDpr-L40A GPDpr-L40A; ubi3∆:: URA3 GPDpr-3xUb(K6R)-S31-Cyc1tr GPDpr-S31; ubi4∆:: 2X (Cyc1tr-Ub(K6R)-GDPpr) NATR; MAT α
FMGy	127	hom2Δ K6R ubiquitin SGA strain	his3; ura3; ubi1∆:: GPDpr-L40A; ubi2∆:: HYGR GPDpr-L40A GPDpr-L40A; ubi3∆:: URA3 GPDpr-3xUb(K6R)-S31-Cyc1tr GPDpr-S31; ubi4∆:: 2X (Cyc1tr-Ub(K6R)-GDPpr) NATR; hom2Δ::KanR; MAT a
FMGy	181	K33R ubiquitin SGA strain_1	his3; ura3; ubi1∆:: GPDpr-L40A; ubi2∆:: HYGR GPDpr-L40A GPDpr-L40A; ubi3∆:: URA3 GPDpr-3xUb(K33R)-S31-Cyc1tr GPDpr-S31; ubi4∆:: 2X (Cyc1tr-Ub(K33R)-GDPpr) NATR; MAT α
FMGy	184	hom2Δ K33R ubiquitin SGA strain	his3; ura3; ubi1∆:: GPDpr-L40A; ubi2∆:: HYGR GPDpr-L40A GPDpr-L40A; ubi3∆:: URA3 GPDpr-3xUb(K33R)-S31-Cyc1tr GPDpr-S31; ubi4∆:: 2X (Cyc1tr-Ub(K33R)-GDPpr) NATR; hom2Δ::KanR; MAT a
FMGy	190	K48R ubiquitin SGA strain_1	his3; ura3; ubi1∆:: GPDpr-L40A; ubi2∆:: HYGR GPDpr-L40A GPDpr-L40A; ubi3∆:: URA3 GPDpr-2XUb(K48R)-Ub-S31-Cyc1tr GPDpr-S31; ubi4∆:: 2X (Cyc1tr-Ub(K48R)-GDPpr) NATR; MAT a
FMGy	192	hom2Δ K48R ubiquitin SGA strain	his3; ura3; ubi1∆:: GPDpr-L40A; ubi2∆:: HYGR GPDpr-L40A GPDpr-L40A; ubi3∆:: URA3 GPDpr-2XUb(K48R)-Ub-S31-Cyc1tr GPDpr-S31; ubi4∆:: 2X (Cyc1tr-Ub(K48R)-GDPpr) NATR; hom2Δ::KanR; MATα
FMGy	198	WT	his3; ura3; MAT a
FMGy	199	hom2Δ doa10Δ	his3; ura3; doa10Δ::NATR; hom2Δ::KanR; MAT α
FMGy	201	doa10Δ	his3; ura3; doa10Δ::NATR; MAT a
FMGy	202	hom2Δ	his3; ura3; hom2Δ::KanR; MAT a
FMGy	213	WT	his3; ura3;MAT α
FMGy	268	hom2Δ K11R ubiquitin SGA strain_1	his3; ura3; ubi1∆:: GPDpr-L40A; ubi2∆:: HYGR GPDpr-L40A GPDpr-L40A; ubi3∆:: URA3 GPDpr-3xUb(K11R)-S31-Cyc1tr GPDpr-S31; ubi4∆:: 2X (Cyc1tr-Ub(K11R)-GDPpr) NATR; hom2Δ::KanR; MAT α
FMGy	327	WT ubiquitin SGA strain_1	his3; ura3; ubi1∆:: GPDpr-L40A; ubi2∆:: HYGR GPDpr-L40A GPDpr-L40A; ubi3∆:: URA3 GPDpr-3xUb-S31-Cyc1tr GPDpr-S31; ubi4∆:: 2X (Cyc1tr-Ub-GDPpr) NATR; MAT α
FMGy	328	K11R ubiquitin SGA strain_2	his3; ura3; ubi1∆:: GPDpr-L40A; ubi2∆:: HYGR GPDpr-L40A GPDpr-L40A; ubi3∆:: URA3 GPDpr-3xUb(K11R)-S31-Cyc1tr GPDpr-S31; ubi4∆:: 2X (Cyc1tr-Ub(K11R)-GDPpr) NATR; MAT a
FMGy	331	WT ubiquitin SGA strain_3	his3; ura3; ubi1∆:: GPDpr-L40A; ubi2∆:: HYGR GPDpr-L40A GPDpr-L40A; ubi3∆:: URA3 GPDpr-3xUb-S31-Cyc1tr GPDpr-S31; ubi4∆:: 2X (Cyc1tr-Ub-GDPpr) NATR; MAT α
FMGy	334	K11R ubiquitin SGA strain_3	his3; ura3; ubi1∆:: GPDpr-L40A; ubi2∆:: HYGR GPDpr-L40A GPDpr-L40A; ubi3∆:: URA3 GPDpr-3xUb(K11R)-S31-Cyc1tr GPDpr-S31; ubi4∆:: 2X (Cyc1tr-Ub(K11R)-GDPpr) NATR; MAT α
FMGy	338	WT ubiquitin SGA strain_4	his3; ura3; ubi1∆:: GPDpr-L40A; ubi2∆:: HYGR GPDpr-L40A GPDpr-L40A; ubi3∆:: URA3 GPDpr-3xUb-S31-Cyc1tr GPDpr-S31; ubi4∆:: 2X (Cyc1tr-Ub-GDPpr) NATR; MAT α
FMGy	341	K11R ubiquitin SGA strain_4	his3; ura3; ubi1∆:: GPDpr-L40A; ubi2∆:: HYGR GPDpr-L40A GPDpr-L40A; ubi3∆:: URA3 GPDpr-3xUb(K11R)-S31-Cyc1tr GPDpr-S31; ubi4∆:: 2X (Cyc1tr-Ub(K11R)-GDPpr) NATR; MAT a
FMGy	344	K6R ubiquitin SGA strain_2	his3; ura3; ubi1∆:: GPDpr-L40A; ubi2∆:: HYGR GPDpr-L40A GPDpr-L40A; ubi3∆:: URA3 GPDpr-3xUb(K6R)-S31-Cyc1tr GPDpr-S31; ubi4∆:: 2X (Cyc1tr-Ub(K6R)-GDPpr) NATR; MAT a
FMGy	347	K27R ubiquitin SGA strain_1	his3; ura3; ubi1∆:: GPDpr-L40A; ubi2∆:: HYGR GPDpr-L40A GPDpr-L40A; ubi3∆:: URA3 GPDpr-3xUb(K27R)-S31-Cyc1tr GPDpr-S31; ubi4∆:: 2X (Cyc1tr-Ub(K27R)-GDPpr) NATR; MAT a
FMGy	349	K29R ubiquitin SGA strain_1	his3; ura3; ubi1∆:: GPDpr-L40A; ubi2∆:: HYGR GPDpr-L40A GPDpr-L40A; ubi3∆:: URA3 GPDpr-3xUb(K29R)-S31-Cyc1tr GPDpr-S31; ubi4∆:: 2X (Cyc1tr-Ub(K29R)-GDPpr) NATR; MAT α
FMGy	352	K33R ubiquitin SGA strain_2	his3; ura3; ubi1∆:: GPDpr-L40A; ubi2∆:: HYGR GPDpr-L40A GPDpr-L40A; ubi3∆:: URA3 GPDpr-3xUb(K33R)-S31-Cyc1tr GPDpr-S31; ubi4∆:: 2X (Cyc1tr-Ub(K33R)-GDPpr) NATR; MAT α
FMGy	355	K48R ubiquitin SGA strain_2	his3; ura3; ubi1∆:: GPDpr-L40A; ubi2∆:: HYGR GPDpr-L40A GPDpr-L40A; ubi3∆:: URA3 GPDpr-2XUb(K48R)-Ub-S31-Cyc1tr GPDpr-S31; ubi4∆:: 2X (Cyc1tr-Ub(K48R)-GDPpr) NATR; MAT a
FMGy	375	K63R ubiquitin SGA strain_1	his3; ura3; ubi1∆:: GPDpr-L40A; ubi2∆:: HYGR GPDpr-L40A GPDpr-L40A; ubi3∆:: URA3 GPDpr-3xUb(K63R)-S31-Cyc1tr GPDpr-S31; ubi4∆:: 2X (Cyc1tr-Ub(K63R)-GDPpr) NATR; MAT a
FMGy	464	hom2Δ K63R ubiquitin SGA strain	his3; ura3; ubi1∆:: GPDpr-L40A; ubi2∆:: HYGR GPDpr-L40A GPDpr-L40A; ubi3∆:: URA3 GPDpr-3xUb(K63R)-S31-Cyc1tr GPDpr-S31; ubi4∆:: 2X (Cyc1tr-Ub(K63R)-GDPpr) NATR; hom2Δ::KanR; MAT a
FMGy	466	K63R ubiquitin SGA strain_2	his3; ura3; ubi1∆:: GPDpr-L40A; ubi2∆:: HYGR GPDpr-L40A GPDpr-L40A; ubi3∆:: URA3 GPDpr-3xUb(K63R)-S31-Cyc1tr GPDpr-S31; ubi4∆:: 2X (Cyc1tr-Ub(K63R)-GDPpr) NATR; MAT a
FMGy	467	K27R ubiquitin SGA strain_2	his3; ura3; ubi1∆:: GPDpr-L40A; ubi2∆:: HYGR GPDpr-L40A GPDpr-L40A; ubi3∆:: URA3 GPDpr-3xUb(K27R)-S31-Cyc1tr GPDpr-S31; ubi4∆:: 2X (Cyc1tr-Ub(K27R)-GDPpr) NATR; MAT a
FMGy	469	hom2Δ K27R ubiquitin SGA strain	his3; ura3; ubi1∆:: GPDpr-L40A; ubi2∆:: HYGR GPDpr-L40A GPDpr-L40A; ubi3∆:: URA3 GPDpr-3xUb(K27R)-S31-Cyc1tr GPDpr-S31; ubi4∆:: 2X (Cyc1tr-Ub(K27R)-GDPpr) NATR; hom2Δ::KanR; MAT α
FMGy	471	K29R ubiquitin SGA strain_2	his3; ura3; ubi1∆:: GPDpr-L40A; ubi2∆:: HYGR GPDpr-L40A GPDpr-L40A; ubi3∆:: URA3 GPDpr-3xUb(K29R)-S31-Cyc1tr GPDpr-S31; ubi4∆:: 2X (Cyc1tr-Ub(K29R)-GDPpr) NATR; MAT a
FMGy	473	hom2Δ K29R ubiquitin SGA strain	his3; ura3; ubi1∆:: GPDpr-L40A; ubi2∆:: HYGR GPDpr-L40A GPDpr-L40A; ubi3∆:: URA3 GPDpr-3xUb(K29R)-S31-Cyc1tr GPDpr-S31; ubi4∆:: 2X (Cyc1tr-Ub(K29R)-GDPpr) NATR; hom2Δ::KanR; MAT α
FMGy	512	hom2Δ WT ubiquitin SGA strain_1	his3; ura3; ubi1∆:: GPDpr-L40A; ubi2∆:: HYGR GPDpr-L40A GPDpr-L40A; ubi3∆:: URA3 GPDpr-3xUb-S31-Cyc1tr GPDpr-S31; ubi4∆:: 2X (Cyc1tr-Ub-GDPpr) NATR; hom2Δ::KanR; MAT α
FMGy	513	WT ubiquitin SGA strain_2	his3; ura3; ubi1∆:: GPDpr-L40A; ubi2∆:: HYGR GPDpr-L40A GPDpr-L40A; ubi3∆:: URA3 GPDpr-3xUb-S31-Cyc1tr GPDpr-S31; ubi4∆:: 2X (Cyc1tr-Ub-GDPpr) NATR; MAT a
FMGy	747	cdc26Δ K6R ubiquitin SGA strain	his3; ura3; ubi1∆:: GPDpr-L40A; ubi2∆:: HYGR GPDpr-L40A GPDpr-L40A; ubi3∆:: URA3 GPDpr-3xUb(K6R)-S31-Cyc1tr GPDpr-S31; ubi4∆:: 2X (Cyc1tr-Ub(K6R)-GDPpr) NATR; cdc26Δ::KanR; MAT α
FMGy	751	cdc26Δ K27R ubiquitin SGA strain	his3; ura3; ubi1∆:: GPDpr-L40A; ubi2∆:: HYGR GPDpr-L40A GPDpr-L40A; ubi3∆:: URA3 GPDpr-3xUb(K27R)-S31-Cyc1tr GPDpr-S31; ubi4∆:: 2X (Cyc1tr-Ub(K27R)-GDPpr) NATR; cdc26Δ::KanR; MAT α
FMGy	753	cdc26Δ K29R ubiquitin SGA strain	his3; ura3; ubi1∆:: GPDpr-L40A; ubi2∆:: HYGR GPDpr-L40A GPDpr-L40A; ubi3∆:: URA3 GPDpr-3xUb(K29R)-S31-Cyc1tr GPDpr-S31; ubi4∆:: 2X (Cyc1tr-Ub(K29R)-GDPpr) NATR; cdc26Δ::KanR; MAT α
FMGy	755	cdc26Δ K33R ubiquitin SGA strain	his3; ura3; ubi1∆:: GPDpr-L40A; ubi2∆:: HYGR GPDpr-L40A GPDpr-L40A; ubi3∆:: URA3 GPDpr-3xUb(K33R)-S31-Cyc1tr GPDpr-S31; ubi4∆:: 2X (Cyc1tr-Ub(K33R)-GDPpr) NATR; cdc26::KanR; MAT a
FMGy	757	cdc26Δ K48R ubiquitin SGA strain	his3; ura3; ubi1∆:: GPDpr-L40A; ubi2∆:: HYGR GPDpr-L40A GPDpr-L40A; ubi3∆:: URA3 GPDpr-2XUb(K48R)-Ub-S31-Cyc1tr GPDpr-S31; ubi4∆:: 2X (Cyc1tr-Ub(K48R-)GDPpr) NATR; cdc26Δ::KanR; MAT a
FMGy	758	cdc26Δ K63R ubiquitin SGA strain	his3; ura3; ubi1∆:: GPDpr-L40A; ubi2∆:: HYGR GPDpr-L40A GPDpr-L40A; ubi3∆:: URA3 GPDpr-3xUb(K63R)-S31-Cyc1tr GPDpr-S31; ubi4∆:: 2X (Cyc1tr-Ub(K63R)-GDPpr) NATR; cdc26Δ::KanR; MAT a
FMGy	759	cdc26Δ WT ubiquitin SGA strain_1	his3; ura3; ubi1∆:: GPDpr-L40A; ubi2∆:: HYGR GPDpr-L40A GPDpr-L40A; ubi3∆:: URA3 GPDpr-3xUb-S31-Cyc1tr GPDpr-S31; ubi4∆:: 2X (Cyc1tr-Ub-GDPpr) NATR; cdc26Δ::KanR; MAT a
FMGy	763	ubc4Δ WT ubiquitin SGA strain	his3; ura3; ubi1∆:: GPDpr-L40A; ubi2∆:: HYGR GPDpr-L40A GPDpr-L40A; ubi3∆:: URA3 GPDpr-3xUb-S31-Cyc1tr GPDpr-S31; ubi4∆:: 2X (Cyc1tr-Ub-GDPpr) NATR; ubc4Δ::KanR; MAT
FMGy	765	ubc4Δ K6R ubiquitin SGA strain	his3; ura3; ubi1∆:: GPDpr-L40A; ubi2∆:: HYGR GPDpr-L40A GPDpr-L40A; ubi3∆:: URA3 GPDpr-3xUb(K6R)-S31-Cyc1tr GPDpr-S31; ubi4∆:: 2X (Cyc1tr-Ub(K6R)-GDPpr) NATR; ubc4Δ::KanR; MAT
FMGy	767	ubc4Δ K11R ubiquitin SGA strain	his3; ura3; ubi1∆:: GPDpr-L40A; ubi2∆:: HYGR GPDpr-L40A GPDpr-L40A; ubi3∆:: URA3 GPDpr-3xUb(K11R)-S31-Cyc1tr GPDpr-S31; ubi4∆:: 2X (Cyc1tr-Ub(K11R)-GDPpr) NATR; ubc4Δ::KanR; MAT α
FMGy	769	ubc4Δ K27R ubiquitin SGA strain	his3; ura3; ubi1∆:: GPDpr-L40A; ubi2∆:: HYGR GPDpr-L40A GPDpr-L40A; ubi3∆:: URA3 GPDpr-3xUb(K27R)-S31-Cyc1tr GPDpr-S31; ubi4∆:: 2X (Cyc1tr-Ub(K27R)-GDPpr) NATR; ubc4Δ::KanR; MAT α
FMGy	771	ubc4Δ K29R ubiquitin SGA strain	his3; ura3; ubi1∆:: GPDpr-L40A; ubi2∆:: HYGR GPDpr-L40A GPDpr-L40A; ubi3∆:: URA3 GPDpr-3xUb(K29R)-S31-Cyc1tr GPDpr-S31; ubi4∆:: 2X (Cyc1tr-Ub(K29R)-GDPpr) NATR; ubc4Δ::KanR; MAT α
FMGy	773	ubc4Δ K33R ubiquitin SGA strain	his3; ura3; ubi1∆:: GPDpr-L40A; ubi2∆:: HYGR GPDpr-L40A GPDpr-L40A; ubi3∆:: URA3 GPDpr-3xUb(K33R)-S31-Cyc1tr GPDpr-S31; ubi4∆:: 2X (Cyc1tr-Ub(K33R)-GDPpr) NATR; ubc4Δ::KanR; MAT α
FMGy	775	ubc4Δ K48R ubiquitin SGA strain	his3; ura3; ubi1∆:: GPDpr-L40A; ubi2∆:: HYGR GPDpr-L40A GPDpr-L40A; ubi3∆:: URA3 GPDpr-2XUb(K48R)-Ub-S31-Cyc1tr GPDpr-S31; ubi4∆:: 2X (Cyc1tr-Ub(K48R)-GDPpr) NATR; ubc4Δ::KanR; MAT α
FMGy	777	ubc4Δ K63R ubiquitin SGA strain	his3; ura3; ubi1∆:: GPDpr-L40A; ubi2∆:: HYGR GPDpr-L40A GPDpr-L40A; ubi3∆:: URA3 GPDpr-3xUb(K63R)-S31-Cyc1tr GPDpr-S31; ubi4∆:: 2X (Cyc1tr-Ub(K63R)-GDPpr) NATR; ubc4Δ::KanR; MAT a
FMGy	810	cdc26Δ K11R ubiquitin SGA strain_1	his3; ura3; ubi1∆:: GPDpr-L40A; ubi2∆:: HYGR GPDpr-L40A GPDpr-L40A; ubi3∆:: URA3 GPDpr-3xUb(K11R)-S31-Cyc1tr GPDpr-S31; ubi4∆:: 2X (Cyc1tr-Ub(K11R)-GDPpr) NATR; cdc26Δ::KanR; MAT a
FMGy	811	cdc26Δ WT ubiquitin SGA strain_2	his3; ura3; ubi1∆:: GPDpr-L40A; ubi2∆:: HYGR GPDpr-L40A GPDpr-L40A; ubi3∆:: URA3 GPDpr-3xUb-S31-Cyc1tr GPDpr-S31; ubi4∆:: 2X (Cyc1tr-Ub-GDPpr) NATR; cdc26Δ::KanR; MAT a
FMGy	813	cdc26Δ K11R ubiquitin SGA strain_2	his3; ura3; ubi1∆:: GPDpr-L40A; ubi2∆:: HYGR GPDpr-L40A GPDpr-L40A; ubi3∆:: URA3 GPDpr-3xUb(K11R)-S31-Cyc1tr GPDpr-S31; ubi4∆:: 2X (Cyc1tr-Ub(K11R)-GDPpr) NATR; cdc26Δ::KanR; MAT a
FMGy	836	cdc26Δ Galpr-Clb2-6xhis33xFlag K11R ubiquitin SGA strain	his3; ura3; Prs413-Galpr-Clb2-6xhis3xFlag; ubi1∆:: GPDpr-L40A; ubi2∆:: HYGR GPDpr-L40A GPDpr-L40A; ubi3∆:: URA3 GPDpr-3xUb(K11R)-S31-Cyc1tr GPDpr-S31; ubi4∆:: 2X (Cyc1tr-Ub(K11R)-GDPpr) NATR; cdc26Δ::KanR; MAT a
FMGy	839	cdc26Δ Galpr-Clb2-6xhis33xFlag WT ubiquitin SGA strain	his3; ura3; Prs413-Galpr-Clb2-6xhis3xFlag; ubi1∆:: GPDpr-L40A; ubi2∆:: HYGR GPDpr-L40A GPDpr-L40A; ubi3∆:: URA3 GPDpr-3xUb-S31-Cyc1tr GPDpr-S31; ubi4∆:: 2X (Cyc1tr-Ub-GDPpr) NATR; cdc26Δ::KanR; MAT a
SK1 deletion array		SK1 non-essential single gene deletion library	his3; ura3; can1::STE2pr-SpHIS5 ; ubi1∆:: GPDpr-L40A; XXXX::KanMX4; MAT a
