# Supplementary material for: Genetic analysis reveals functions of atypical polyubiquitin chains
Source: eLife journal article supplement (doi:10.7554/elife.42955), 2018-12-14
Supplement: supp [file elife-42955-supp-v1.zip › elife_poa_e42955_Supplementary_file_3.xlsx]

## Sheet: Sheet1
Supplementary file 3
Oligonucleotide sequences
Name	Description	Sequence
DS268	GPD promoter Fw	GGTTGAAACCAGTTCCCTGA
DS270	Ubi1 genotyping primer Rev with DS268	CCGGAGGTAAGAAGTAAAGGTAA
DS180	Ubi2 genotyping primer Fw with DS187	AGGTTGACCCATCCCTCAAT
DS187	Ubi2 genotyping primer Rev with DS180	TGAAATCGTTTATTATGTCCATT
DS193	Ubi3 genotyping primer Fw with DS194	CCCATGCATGTGGAGTCATA
DS194	Ubi3 genotyping primer Rev with DS193	TTGCGAGAACGCTAAAAAGG
DS195	Ubi4 genotyping primer Fw with DS198	GGCAACCtATGATAGGAAAT
DS196	Ubi4 genotyping primer Rev with DS198RC	TGACTCAATTGGTCGGCTTA
DS198	Sequencing primer between Cyt1tr and GDPpr	AGTGGCCAGCTAGCGAGTTTA
DS198RC	Sequencing primer between Cyt1tr and GDPpr RC	TAAACTCGCTAGCTGGCCACT
DS199	3X WTUb	AAGCTTATGCAGATTTTTGTTAAGACACTAACCGGAAAAACAATAACTTTGGAAGTAGAATCTAGTGATACGATTGATAATGTTAAGTCTAAAATTCAAGACAAAGAGGGCATCCCTCCTGACCAGCAAAGACTGATTTTCGCTGGTAAACAATTGGAAGATGGTAGAACACTGTCAGATTACAACATTCAAAAAGAGTCCACATTGCATCTTGTATTGAGATTAAGGGGTGGTATGCAAATTTTCGTCAAAACATTAACAGGAAAAACTATCACGCTAGAAGTTGAATCTTCTGATACTATCGATAATGTGAAATCAAAGATCCAGGATAAGGAGGGTATACCACCAGACCAACAAAGACTAATCTTTGCCGGTAAACAGCTCGAAGATGGACGAACC…
DS200	3X K6R Ub	AAGCTTATGCAGATTTTTGTTAGAACACTAACCGGAAAAACAATAACTTTGGAAGTAGAATCTAGTGATACGATTGATAATGTTAAGTCTAAAATTCAAGACAAAGAGGGCATCCCTCCTGACCAGCAAAGACTGATTTTCGCTGGTAAACAATTGGAAGATGGTAGAACACTGTCAGATTACAACATTCAAAAAGAGTCCACATTGCATCTTGTATTGAGATTAAGGGGTGGTATGCAAATTTTCGTCAGAACATTAACAGGAAAAACTATCACGCTAGAAGTTGAATCTTCTGATACTATCGATAATGTGAAATCAAAGATCCAGGATAAGGAGGGTATACCACCAGACCAACAAAGACTAATCTTTGCCGGTAAACAGCTCGAAGATGGACGAACC…
DS201	3X K11R Ub	AAGCTTATGCAGATTTTTGTTAAGACACTAACCGGAAGAACAATAACTTTGGAAGTAGAATCTAGTGATACGATTGATAATGTTAAGTCTAAAATTCAAGACAAAGAGGGCATCCCTCCTGACCAGCAAAGACTGATTTTCGCTGGTAAACAATTGGAAGATGGTAGAACACTGTCAGATTACAACATTCAAAAAGAGTCCACATTGCATCTTGTATTGAGATTAAGGGGTGGTATGCAAATTTTCGTCAAAACATTAACAGGAAGAACTATCACGCTAGAAGTTGAATCTTCTGATACTATCGATAATGTGAAATCAAAGATCCAGGATAAGGAGGGTATACCACCAGACCAACAAAGACTAATCTTTGCCGGTAAACAGCTCGAAGATGGACGAACC…
DS202	3X K27R Ub	AAGCTTATGCAGATTTTTGTTAAGACACTAACCGGAAAAACAATAACTTTGGAAGTAGAATCTAGTGATACGATTGATAATGTTAGATCTAAAATTCAAGACAAAGAGGGCATCCCTCCTGACCAGCAAAGACTGATTTTCGCTGGTAAACAATTGGAAGATGGTAGAACACTGTCAGATTACAACATTCAAAAAGAGTCCACATTGCATCTTGTATTGAGATTAAGGGGTGGTATGCAAATTTTCGTCAAAACATTAACAGGAAAAACTATCACGCTAGAAGTTGAATCTTCTGATACTATCGATAATGTGAGATCAAAGATCCAGGATAAGGAGGGTATACCACCAGACCAACAAAGACTAATCTTTGCCGGTAAACAGCTCGAAGATGGACGAACC…
DS203	3X K29R Ub	AAGCTTATGCAGATTTTTGTTAAGACACTAACCGGAAAAACAATAACTTTGGAAGTAGAATCTAGTGATACGATTGATAATGTTAAGTCTAGAATTCAAGACAAAGAGGGCATCCCTCCTGACCAGCAAAGACTGATTTTCGCTGGTAAACAATTGGAAGATGGTAGAACACTGTCAGATTACAACATTCAAAAAGAGTCCACATTGCATCTTGTATTGAGATTAAGGGGTGGTATGCAAATTTTCGTCAAAACATTAACAGGAAAAACTATCACGCTAGAAGTTGAATCTTCTGATACTATCGATAATGTGAAATCAAGAATCCAGGATAAGGAGGGTATACCACCAGACCAACAAAGACTAATCTTTGCCGGTAAACAGCTCGAAGATGGACGAACC…
DS204	3X K33R Ub	AAGCTTATGCAGATTTTTGTTAAGACACTAACCGGAAAAACAATAACTTTGGAAGTAGAATCTAGTGATACGATTGATAATGTTAAGTCTAAAATTCAAGACAGAGAGGGCATCCCTCCTGACCAGCAAAGACTGATTTTCGCTGGTAAACAATTGGAAGATGGTAGAACACTGTCAGATTACAACATTCAAAGAGAGTCCACATTGCATCTTGTATTGAGATTAAGGGGTGGTATGCAAATTTTCGTCAAAACATTAACAGGAAAAACTATCACGCTAGAAGTTGAATCTTCTGATACTATCGATAATGTGAAATCAAAGATCCAGGATAGAGAGGGTATACCACCAGACCAACAAAGACTAATCTTTGCCGGTAAACAGCTCGAAGATGGACGAACC…
DS205	2X K48R Ub 1X WT Ub	AAGCTTATGCAGATTTTTGTTAAGACACTAACCGGAAAAACAATAACTTTGGAAGTAGAATCTAGTGATACGATTGATAATGTTAAGTCTAAAATTCAAGACAAAGAGGGCATCCCTCCTGACCAGCAAAGACTGATTTTCGCTGGTAGACAATTGGAAGATGGTAGAACACTGTCAGATTACAACATTCAAAAAGAGTCCACATTGCATCTTGTATTGAGATTAAGGGGTGGTATGCAAATTTTCGTCAAAACATTAACAGGAAAAACTATCACGCTAGAAGTTGAATCTTCTGATACTATCGATAATGTGAAATCAAAGATCCAGGATAAGGAGGGTATACCACCAGACCAACAAAGACTAATCTTTGCCGGTAGACAGCTCGAAGATGGACGAACC…
DS206	3X K6R K11RUb	AAGCTTATGCAGATTTTTGTTAGAACACTAACCGGAAGAACAATAACTTTGGAAGTAGAATCTAGTGATACGATTGATAATGTTAAGTCTAAAATTCAAGACAAAGAGGGCATCCCTCCTGACCAGCAAAGACTGATTTTCGCTGGTAAACAATTGGAAGATGGTAGAACACTGTCAGATTACAACATTCAAAGAGAGTCCACATTGCATCTTGTATTGAGATTAAGGGGTGGTATGCAAATTTTCGTCAGAACATTAACAGGAAGAACTATCACGCTAGAAGTTGAATCTTCTGATACTATCGATAATGTGAAATCAAAGATCCAGGATAAGGAGGGTATACCACCAGACCAACAAAGACTAATCTTTGCCGGTAAACAGCTCGAAGATGGACGAACC…
DS207	3X K6R K29R Ub	AAGCTTATGCAGATTTTTGTTAAGACACTAACCGGAAAAACAATAACTTTGGAAGTAGAATCTAGTGATACGATTGATAATGTTAGATCTAGAATTCAAGACAGAGAGGGCATCCCTCCTGACCAGCAAAGACTGATTTTCGCTGGTAAACAATTGGAAGATGGTAGAACACTGTCAGATTACAACATTCAAAAAGAGTCCACATTGCATCTTGTATTGAGATTAAGGGGTGGTATGCAAATTTTCGTCAAAACATTAACAGGAAAAACTATCACGCTAGAAGTTGAATCTTCTGATACTATCGATAATGTGAAATCAAGAATCCAGGATAGAGAGGGTATACCACCAGACCAACAAAGACTAATCTTTGCCGGTAGACAGCTCGAAGATGGACGAACC…
DS208	3X K11R K29R Ub	AAGCTTATGCAGATTTTTGTTAAGACACTAACCGGAAGAACAATAACTTTGGAAGTAGAATCTAGTGATACGATTGATAATGTTAAGTCTAGAATTCAAGACAAAGAGGGCATCCCTCCTGACCAGCAAAGACTGATTTTCGCTGGTAAACAATTGGAAGATGGTAGAACACTGTCAGATTACAACATTCAAAAAGAGTCCACATTGCATCTTGTATTGAGATTAAGGGGTGGTATGCAAATTTTCGTCAAAACATTAACAGGAAGAACTATCACGCTAGAAGTTGAATCTTCTGATACTATCGATAATGTGAAATCAAGAATCCAGGATAAGGAGGGTATACCACCAGACCAACAAAGACTAATCTTTGCCGGTAAACAGCTCGAAGATGGACGAACC…
DS209	3X K11R K33R Ub	AAGCTTATGCAGATTTTTGTTAAGACACTAACCGGAAGAACAATAACTTTGGAAGTAGAATCTAGTGATACGATTGATAATGTTAAGTCTAAAATTCAAGACAGAGAGGGCATCCCTCCTGACCAGCAAAGACTGATTTTCGCTGGTAAACAATTGGAAGATGGTAGAACACTGTCAGATTACAACATTCAAAAAGAGTCCACATTGCATCTTGTATTGAGATTAAGGGGTGGTATGCAAATTTTCGTCAAAACATTAACAGGAAGAACTATCACGCTAGAAGTTGAATCTTCTGATACTATCGATAATGTGAAATCAAAGATCCAGGATAGAGAGGGTATACCACCAGACCAACAAAGACTAATCTTTGCCGGTAAACAGCTCGAAGATGGACGAACC…
DS210	3X K27R K33R Ub	AAGCTTATGCAGATTTTTGTTAAGACACTAACCGGAAAAACAATAACTTTGGAAGTAGAATCTAGTGATACGATTGATAATGTTAGATCTAAAATTCAAGACAAAGAGGGCATCCCTCCTGACCAGCAAAGACTGATTTTCGCTGGTAAACAATTGGAAGATGGTAGAACACTGTCAGATTACAACATTCAAAGAGAGTCCACATTGCATCTTGTATTGAGATTAAGGGGTGGTATGCAAATTTTCGTCAAAACATTAACAGGAAAAACTATCACGCTAGAAGTTGAATCTTCTGATACTATCGATAATGTGAGATCAAAGATCCAGGATAAGGAGGGTATACCACCAGACCAACAAAGACTAATCTTTGCCGGTAAACAGCTCGAAGATGGACGAACC…
DS211	3X K29R K33R Ub	AAGCTTATGCAGATTTTTGTTAAGACACTAACCGGAAAAACAATAACTTTGGAAGTAGAATCTAGTGATACGATTGATAATGTTAAGTCTAGAATTCAAGACAGAGAGGGCATCCCTCCTGACCAGCAAAGACTGATTTTCGCTGGTAAACAATTGGAAGATGGTAGAACACTGTCAGATTACAACATTCAAAAAGAGTCCACATTGCATCTTGTATTGAGATTAAGGGGTGGTATGCAAATTTTCGTCAAAACATTAACAGGAAAAACTATCACGCTAGAAGTTGAATCTTCTGATACTATCGATAATGTGAAATCAAGAATCCAGGATAGAGAGGGTATACCACCAGACCAACAAAGACTAATCTTTGCCGGTAAACAGCTCGAAGATGGACGAACC…
DS212	1X K11R K48R Ub 2x K11R Ub	AAGCTTATGCAGATTTTTGTTAAGACACTAACCGGAAGAACAATAACTTTGGAAGTAGAATCTAGTGATACGATTGATAATGTTAAGTCTAAAATTCAAGACAAAGAGGGCATCCCTCCTGACCAGCAAAGACTGATTTTCGCTGGTAGACAATTGGAAGATGGTAGAACACTGTCAGATTACAACATTCAAAAAGAGTCCACATTGCATCTTGTATTGAGATTAAGGGGTGGTATGCAAATTTTCGTCAAAACATTAACAGGAAGAACTATCACGCTAGAAGTTGAATCTTCTGATACTATCGATAATGTGAAATCAAAGATCCAGGATAAGGAGGGTATACCACCAGACCAACAAAGACTAATCTTTGCCGGTAAACAGCTCGAAGATGGACGAACC…
DS213	1X K29R K48R K Ub 2x K29R Ub	AAGCTTATGCAGATTTTTGTTAAGACACTAACCGGAAAAACAATAACTTTGGAAGTAGAATCTAGTGATACGATTGATAATGTTAAGTCTAGAATTCAAGACAAAGAGGGCATCCCTCCTGACCAGCAAAGACTGATTTTCGCTGGTAGACAATTGGAAGATGGTAGAACACTGTCAGATTACAACATTCAAAAAGAGTCCACATTGCATCTTGTATTGAGATTAAGGGGTGGTATGCAAATTTTCGTCAAAACATTAACAGGAAAAACTATCACGCTAGAAGTTGAATCTTCTGATACTATCGATAATGTGAAATCAAGAATCCAGGATAAGGAGGGTATACCACCAGACCAACAAAGACTAATCTTTGCCGGTAAACAGCTCGAAGATGGACGAACC…
DS214	3X K11R K27R K29R Ub	AAGCTTATGCAGATTTTTGTTAAGACACTAACCGGAAGAACAATAACTTTGGAAGTAGAATCTAGTGATACGATTGATAATGTTAGATCTAGAATTCAAGACAAAGAGGGCATCCCTCCTGACCAGCAAAGACTGATTTTCGCTGGTAAACAATTGGAAGATGGTAGAACACTGTCAGATTACAACATTCAAAAAGAGTCCACATTGCATCTTGTATTGAGATTAAGGGGTGGTATGCAAATTTTCGTCAAAACATTAACAGGAAGAACTATCACGCTAGAAGTTGAATCTTCTGATACTATCGATAATGTGAGATCAAGAATCCAGGATAAGGAGGGTATACCACCAGACCAACAAAGACTAATCTTTGCCGGTAAACAGCTCGAAGATGGACGAACC…
