# Supplementary material for: Genetic analysis reveals functions of atypical polyubiquitin chains
Source: eLife journal article supplement (doi:10.7554/elife.42955), 2018-12-14
Supplement: supp [file elife-42955-supp-v1.zip › elife_poa_e42955_Supplementary_file_4.xlsx]

## Sheet: Sheet1
Supplementary file 4
The ubiquitin linkage SGA
Ubiquitin	LYS21	YDL180W	PCL9	RGT2	LDB17	TMA17	VCX1	YDL114W	DLD2	YDL177C	YDL186W	YDL124W	YDL121C	DLD1	YDL176W	UGA3	PCL2	SFA1	INH1	YDL183C	RPL41A	LYS20	SNF3	SNA4	TOM71	GRX6	BAP3	MRH1	ABP140	YCL075W	PRB1	YER010C	HMF1	RER1	ISY1	ARO10	AGA2	SHE1	SPO13	DLD3	ADP1	MF(ALPHA)1	BDF2	MEI4	EAF3	MAM1	BUD31	YMR155W	ERM6
K11R	0.601837	0.483449	-1.08856	2.21513	0.324688	0.305112	-0.211227	0.087956	-0.589627	-0.706302	-0.209186	-0.378936	-0.202449	0.279956	0.313562	0.722708	0.107311	0.112247	0.991727	1.20233	-0.098409	-1.48478	0.198679	-0.412948	0.297751	-0.781629	-0.398954	-0.300722	-0.339339	-0.480911	0.001366	-0.325932	0.449883	2.10138	2.77765	0.066684	0.214416	-0.136177	-0.196947	0.389548	1.34204	0.698085	1.46407	0.587903	0.207001	0.806906	1.95472	0.140198	0.72395
K11R K29R	-0.015471	-0.896648	0.024693	0.613093	1.09926	-0.014297	0.008978	-0.087633	-0.093288	0.122016	0.08839	0.005648	0.576012	-0.004733	0.204638	0.203642	0.078239	0.081272	0.09737	-0.181367	0.197186	-0.199837	-0.694991	0.309802	-0.281155	0.261623	-0.011176	-0.518347	-0.447093	-0.610531	-0.263241	0.372822	-0.127633	1.76287	2.27549	-0.460944	-0.184823	-0.352554	-0.661822	0.122178	0.094705	-0.561689	0.172849	0.1605	-0.206454	-0.014576	0.872594	0.22374	2.20418
K29R	-1.58124	-1.8915	-0.789966	0.79824	1.675	-0.201472	-0.110591	-0.707656	-0.114374	0.509046	0.518611	0.299989	-0.078924	-0.209755	-0.102016	0.813753	0.18092	0.118996	-0.082174	-0.511093	0.000907	0.70125	0.61499	-0.219344	0.26441	0.531277	0.316804	1.08287	0.001752	-0.24408	-0.710288	-1.02315	0.054429	1.44854	0.324587	-0.362288	-0.853518	-0.202732	0.135035	-0.160583	-0.562851	-0.714686	-0.34832	-0.146344	-0.47721	-0.141977	-1.95519	-0.875567	1.20618
WILDTYPE	1.29256	3.84057	1.15346	3.27227	3.84063	1.03773	0.895036	1.03708	1.25247	1.3956	2.32381	1.61579	1.03982	1.95677	1.49931	1.90627	0.854491	1.21365	2.27483	1.8887	1.29919	1.13273	3.29156	0.599866	-0.00241	0.085977	-0.860029	0.456122	-0.059054	-0.074072	0.219093	0.214485	-0.024085	0.188142	0.264472	0.391485	0.168554	0.313091	0.120357	0.01872	0.187537	0.568558	0.719786	0.157383	0.266291	0.10064	0.900407	0.068502	0.139577
WILDTYPE LOW	1.78008	3.28013	1.70787	2.20254	3.12144	1.49215	1.20711	1.92338	2.2985	3.09395	4.21532	1.29264	1.90471	2.88535	3.40131	2.99522	1.57998	2.19086	2.81092	2.19804	1.88461	4.07549	3.79335	1.72232	1.36458	0.892418	0.479164	1.27702	0.880936	-0.322066	-0.431524	-0.293235	-0.346262	1.15877	0.22254	0.6338	0.721227	0.693147	-0.131839	-0.278219	0.056856	-0.37856	0.780149	0.088414	-0.156939	0.137073	0.670693	0.796151	0.98345
K11R K27R K29R	-1.28412	-1.79476	0.22018	-1.10398	-1.89826	0.096545	0.710803	-0.185426	0.080567	-0.024219	-0.2763	-0.093298	0.106636	0.177679	-0.086624	0.377877	0.005871	-0.50452	-0.57633	-0.093966	-0.775943	-0.423292	-2.3088	-0.497947	-0.6365	0.08999	-0.097292	-0.081093	0.21716	-0.033583	-0.425029	0.513946	0.297663	-2.43001	-0.280285	-0.808169	-1.09481	0.068584	-0.511355	0.3856	0.020355	0.209772	-0.525364	0.109569	-0.720839	-0.539548	-1.43812	-0.820411	0.621019
K27R	-0.591546	-0.516676	0.097279	0.002204	-0.177006	0.592288	-0.002679	-0.010484	0.588825	0.88425	0.479967	0.181476	0.281909	0.007014	0.316094	-0.297772	0.103329	0.618325	-0.501272	0.621785	0.302961	-1.38384	0.778915	-0.199632	-0.217183	0.017729	0.586101	-0.110739	0.177673	-0.555936	-0.239427	0.318851	-1.13773	-4.77776	-1.77976	-0.322191	-2.9811	-1.30961	0.392414	-0.17844	-0.365983	0.242534	-0.927262	-0.140095	-0.241193	0.804066	0.477182	0.196062	1.38371
K11R K48R	0.696146	2.59988	1.0165	-1.01183	-1.90822	-0.693373	-0.195444	-0.612137	0.109894	-0.323551	-0.215312	-0.078553	-0.31182	0.009252	-0.124567	-0.099714	0.316656	0.70387	0.189068	-0.900752	-1.09384	-1.2011	-1.61949	-0.278764	-0.001772	0.097235	0.020196	-0.485955	0.00736	0.574194	-0.000532	0.634217	-1.0844	-6.79906	-3.29566	-0.829466	-0.375238	-1.56209	-0.731734	0.007264	-0.418417	-0.367217	-0.581903	-1.1319	-1.60804	-0.06376	-2.90577	-0.106123	-0.694521
K29R K48R	0.076355	1.59448	-0.483523	-1.0106	0.907642	-0.888988	-0.612135	-0.907813	-1.08628	-1.18264	-0.796066	-0.608775	-0.520538	-0.812734	-0.091418	-1.09452	-0.878264	-0.299834	-0.507688	-0.204428	-0.702284	-3.57698	-4.01725	0.709755	0.663841	0.334279	0.316654	-0.289628	0.165524	-1.23641	-0.584018	-0.589691	-0.795106	-7.08237	-1.07996	-0.893138	-0.833306	-3.7196	-1.49564	-1.05319	-1.00095	-1.785	-3.72996	-1.63755	-2.08232	-1.10279	-5.97365	-1.59575	-4.17734
K48R	1.2046	2.30026	-0.284654	-1.51457	-0.500546	-0.419784	-0.612031	-1.30715	-0.878399	-0.6933	-1.29764	-0.791095	-0.320928	-0.679545	-0.077326	-0.703879	-0.27884	-0.215301	0.175305	-0.198277	-0.097854	-0.806785	-1.57514	0.198658	-0.643319	-0.986333	-0.986273	-1.30901	-1.24238	-0.97383	-1.24216	-1.72836	-0.65437	-9.69338	-2.29805	-0.935043	-2.48079	-2.68896	-1.70661	-0.647999	-0.39818	-1.10247	-1.65705	-1.0936	-0.837379	-0.869024	-5.99594	-1.44036	-4.31133
K11R K33R	-0.575223	-2.52443	0.07595	-0.877057	-1.51692	-1.01408	-0.009918	0.304427	-0.57573	0.711488	-0.095194	-0.024704	-0.093856	0.319246	-0.476283	1.68015	-0.00964	0.803073	0.288258	0.903929	1.31182		1.68147	0.112012	-0.21439	-0.692773	-1.29777	-0.300555	-0.245643		-1.39724	-2.98317	-1.40065		-1.41085	-1.00475	-1.38627	-2.48222	-0.886285	-0.554161	-1.56379	-1.75366	-2.52475	-1.90668	-0.898671	-0.496471	-2.92433	-1.00079	-1.90174
K27R K33R	-1.81646	-1.91366	-0.608246	-0.405469	0.079297	-0.511585	-0.392523	0.283472	0.702504	0.513941	-0.310789	-0.389963	-0.416456	-0.301693	-0.618527	0.286439	-0.695295	-0.588453	-1.17948	-0.684201	-0.412557	2.77889	2.09757	0.190452	0.682284	0.079172	0.301655	-0.09425	0.611368	-0.627648	-0.5704	-0.62807	-0.792299	-1.66696	-0.586698	-0.637654	-1.60822	0.094678	-0.574852	0.110547	-0.669612	-0.434395	0.560963	-0.336709	1.25788	-0.292461	-1.81445	-0.641441	-1.9191
K29R K33R	-0.781327	-1.89669	-0.497091	-0.295763	1.01293	-0.577869	-0.401762	0.484035	-0.420294	-0.411173	-0.110104	-0.424471	-0.580561	-0.824769	-0.476301	-0.881481	0.086175	0.116873	0.379179	0.11487	0.318212	-0.109988	-0.491154	-0.078013	-0.107654	0.037079	0.194991	0.409892	0.354461	0.216114	-0.072178	0.259815	-0.124065	2.57807	0.999444	0.266791	-0.183075	0.596837	0.276806	0.543803	0.242101	0.313808	-0.270646	-0.049096	-0.166106	0.500232	0.635614	-0.151505	-0.621754
K33R	0.392753	0.182991	-0.399224	0.105053	0.495295	0.18999	-0.119906	-0.014819	-0.284041	0.180712	0.712305	-0.182731	-0.189391	-0.406258	0.222486	-0.521303	0.183797	-0.402539	-0.60214	-0.385069	-0.112357	-0.613631	-0.891809	-0.423999	0.068732	-0.228998	0.293142	0.276764	0.164982	0.123893	0.500582	0.345647	0.388048	1.31285	1.41742	-0.788736	-1.10138	1.03631	0.377215	0.170174	0.487142	-0.352275	-0.690453	-0.138354	0.120682	-0.191871	-0.855973	-0.028131	-1.00223
K6R	1.08014	-0.28286	1.12436	0.396705	-1.69864	0.616348	0.489115	0.507682	0.775598	0.304871	0.311302	0.106038	0.002355	-0.590169	-0.106706	0.403406	0.294046	0.222077	0.679574	-0.593774	0.299252	0.814733	-1.27602	0.089166	0.693282	-0.015355	-0.010118	0.019833	-0.75864	0.700947	0.837247	1.49679	-0.094656	-4.85746	-0.088657	0.209695	-0.311611	0.9271	0.997675	0.178177	-0.096553	-0.565155	0.849968	1.10027	0.855538	0.080542	0.260151	0.562919	1.4795
K6R K11R	0.890327	-0.897537	1.12249	-1.69593	-3.28253	-0.007581	0.179027	-0.123876	0.215937	0.101201	0.511545	-0.277889	0.098893	-0.897134	-0.0861	-1.38631	-0.218068	-0.477694	0.099839	-1.01194	-1.10938	0.100816	-1.2042	-1.38816	-0.263457	-0.863974	-0.397717	-0.124349	-0.086272	0.000221	0.547533	-0.302254	-0.082713	2.81825	0.894823	0.812397	1.41363	2.2896	0.186396	0.32882	0.520841	0.407627	1.335	0.987749	1.05167	0.615792	1.61169	0.514826	3.00941
K6R K29R	0.988552	-1.21708	0.687185	-0.119702	-2.18793	0.013298	-0.112461	0.075717	0.712317	0.011748	-0.59846	-1.00205	-0.288211	-1.01983	-1.903	-0.501157	-0.106257	-0.292821	0.394789	0.18496	0.503447	-0.304097	0.181482	0.179243	-0.131739	-0.109742	0.188021	-0.47955	0.318521	0.658424	-0.068472	0.393749	-0.055672	-2.50155	0.895734	-0.464794		-2.6114	-0.632031	-0.173444	0.420908	-0.122027	0.419465	0.6977	0.589062	1.04243	0.6369	0.922551	0.694038
[truncated: 2,606 more columns]
