# Supplementary material for: Genetic analysis reveals functions of atypical polyubiquitin chains
Source: eLife journal article supplement (doi:10.7554/elife.42955), 2018-12-14
Supplement: supp [file elife-42955-supp-v1.zip › elife_poa_e42955_Supplementary_file_5.xlsx]

## Sheet: Table S5
Supplementary file 5
Raw file	Sequence	Length	K Count	Modifications	Modified sequence	GlyGly (K) Probabilities	Oxidation (M) Probabilities	GlyGly (K) Score Diffs	Oxidation (M) Score Diffs	Acetyl (Protein N-term)	GlyGly (K)	Oxidation (M)	Missed cleavages	Proteins	Leading proteins	Leading razor protein	Gene names	Protein names	Type	Labeling State	MS/MS m/z	Charge	m/z	Mass	Resolution	Uncalibrated - Calibrated m/z [ppm]	Uncalibrated - Calibrated m/z [Da]	Mass Error [ppm]	Mass Error [Da]	Uncalibrated Mass Error [ppm]	Uncalibrated Mass Error [Da]	Max intensity m/z 0	Max intensity m/z 1	Retention time	Retention length	Calibrated retention time	Calibrated retention time start	Calibrated retention time finish	Retention time calibration	Match time difference	Match m/z difference	Match q-value	Match score	Number of data points	Number of scans	Number of isotopic peaks	PIF	Fraction of total spectrum	Base peak fraction
doa10Δ(H)/WT(L) Rep1	GNTANVLR	8	0	Unmodified	_GNTANVLR_					0	0	0	0	P04710	P04710	P04710	AAC1	ADP,ATP carrier protein 1	ISO-MSMS	-1	422.737	2	422.735	843.456	NaN	NaN	NaN	-0.26113	-0.00011039	NaN	NaN	NaN	NaN	15.181	0.31612	16.413	16.27	16.586	1.2313								0	0	0
doa10Δ(H)/WT(L) Rep1	QFNGLLDVYKK	11	2	Unmodified	_QFNGLLDVYKK_					0	0	0	1	P04710	P04710	P04710	AAC1	ADP,ATP carrier protein 1	MULTI-MATCH			3	442.247	1323.72	91561.6	5.4188	0.0023965	-0.70105	-0.00031004	4.7178	0.0020864	442.247	447.589	54.252	0.71286	56.286	55.964	56.676	2.0333	-0.14404	-0.00047582	NaN	46.73	297	76	7	NaN	NaN	NaN
doa10Δ(H)/WT(L) Rep1	TLSYLLDGTVLNQDFYIPMQGIR	23	0	Unmodified	_TLSYLLDGTVLNQDFYIPMQGIR_					0	0	0	0	P37898	P37898	P37898	AAP1	Alanine/arginine aminopeptidase	ISO-MSMS	-1	886.798	3	886.46	2656.36	NaN	NaN	NaN	-0.31894	-0.00028273	NaN	NaN	NaN	NaN	111.78	0.16742	112.3	112.17	112.34	0.52949								0	0	0
doa10Δ(H)/WT(L) Rep1	FFPDKLVYLSKPTWANHMAIFENQGLK	27	3	Unmodified	_FFPDKLVYLSKPTWANHMAIFENQGLK_					0	0	0	2	P23542	P23542	P23542	AAT2	Aspartate aminotransferase, cytoplasmic	MULTI-MATCH			4	799.418	3193.64	68013.3	5.7175	0.0045706	0.3323	0.00026565	6.0498	0.0048363	799.919	805.68	88.747	0.20253	90.881	90.765	90.968	2.1332	0.19656	0.0010136	NaN	23.123	55	22	5	NaN	NaN	NaN
doa10Δ(H)/WT(L) Rep1	FFPDKLVYLSKPTWANHMAIFENQGLK	27	3	Unmodified	_FFPDKLVYLSKPTWANHMAIFENQGLK_					0	0	0	2	P23542	P23542	P23542	AAT2	Aspartate aminotransferase, cytoplasmic	MULTI-MATCH			4	799.418	3193.64	67121.6	5.706	0.0045615	1.2467	0.00099661	6.9527	0.0055581	799.67	805.68	88.045	0.41189	90.178	90.139	90.551	2.1332	-0.4255	0.0029817	NaN	29.013	100	44	6	NaN	NaN	NaN
doa10Δ(H)/WT(L) Rep1	FFPDKLVYLSKPTWANHMAIFENQGLK	27	3	Unmodified	_FFPDKLVYLSKPTWANHMAIFENQGLK_					0	0	0	2	P23542	P23542	P23542	AAT2	Aspartate aminotransferase, cytoplasmic	MULTI-MATCH			4	799.418	3193.64	67159.2	5.6666	0.00453	1.0279	0.0008217	6.6945	0.0053517	799.92	805.931	87.835	0.3688	89.968	89.874	90.243	2.1332	-0.28565	0.0018545	NaN	42.172	192	38	11	NaN	NaN	NaN
doa10Δ(H)/WT(L) Rep1	FFPDKLVYLSKPTWANHMAIFENQGLK	27	3	Unmodified	_FFPDKLVYLSKPTWANHMAIFENQGLK_					0	0	0	2	P23542	P23542	P23542	AAT2	Aspartate aminotransferase, cytoplasmic	MULTI-MATCH			5	639.736	3193.64	75113.6	5.5827	0.0035715	-0.37954	-0.00024281	5.2032	0.0033286	640.137	644.745	89.639	0.20905	91.772	91.683	91.892	2.1332	0.55761	-0.0015412	NaN	55.986	86	21	7	NaN	NaN	NaN
doa10Δ(H)/WT(L) Rep1	FFPDKLVYLSKPTWANHMAIFENQGLK	27	3	Unmodified	_FFPDKLVYLSKPTWANHMAIFENQGLK_					0	0	0	2	P23542	P23542	P23542	AAT2	Aspartate aminotransferase, cytoplasmic	MULTI-MATCH			5	639.736	3193.64	74384.4	5.6556	0.0036181	-0.19133	-0.0001224	5.4643	0.0034957	639.936	644.745	89.029	0.34185	91.162	90.942	91.283	2.1332	0.39436	-0.0014462	NaN	67.827	180	38	9	NaN	NaN	NaN
doa10Δ(H)/WT(L) Rep1	FFPDKLVYLSKPTWANHMAIFENQGLK	27	3	Unmodified	_FFPDKLVYLSKPTWANHMAIFENQGLK_					0	0	0	2	P23542	P23542	P23542	AAT2	Aspartate aminotransferase, cytoplasmic	MULTI-MATCH			5	639.736	3193.64	75197.8	5.6353	0.0036051	1.748	0.0011183	7.3832	0.0047233	639.937	644.746	89.187	0.12051	91.321	91.283	91.404	2.1332	0.16263	0.0046992	NaN	24.975	52	12	11	NaN	NaN	NaN
doa10Δ(H)/WT(L) Rep1	FFPDKLVYLSKPTWANHMAIFENQGLK	27	3	Unmodified	_FFPDKLVYLSKPTWANHMAIFENQGLK_					0	0	0	2	P23542	P23542	P23542	AAT2	Aspartate aminotransferase, cytoplasmic	MULTI-MATCH			5	639.736	3193.64	74175.6	5.6512	0.0036153	0.95839	0.00061312	6.6096	0.0042284	639.937	644.946	87.839	0.37851	89.972	89.874	90.253	2.1332	-0.072477	0.0021713	NaN	49.318	277	39	13	NaN	NaN	NaN
doa10Δ(H)/WT(L) Rep1	FFPDKLVYLSKPTWANHMAIFENQGLK	27	3	Unmodified	_FFPDKLVYLSKPTWANHMAIFENQGLK_					0	0	0	2	P23542	P23542	P23542	AAT2	Aspartate aminotransferase, cytoplasmic	MULTI-MATCH			5	639.736	3193.64	75387.3	5.5836	0.003572	0.11359	7.27e-05	5.6972	0.0036447	639.936	644.946	89.4	0.095703	91.534	91.502	91.598	2.1332	0.96078	-0.00059575	NaN	40.706	43	9	6	NaN	NaN	NaN
doa10Δ(H)/WT(L) Rep1	LGTPGNWDHIVNQCGMFSFTGLTPQMVK	28	1	Unmodified	_LGTPGNWDHIVNQCGMFSFTGLTPQMVK_					0	0	0	0	P23542	P23542	P23542	AAT2	Aspartate aminotransferase, cytoplasmic	MULTI-MSMS		1046.17	3	1045.83	3134.48	61845.8	5.166	0.0054028	-0.49704	-0.00051982	4.6689	0.0048829	1045.83	1048.84	96.625	0.21776	98.758	98.605	98.823	2.1334					107	22	8	0	0	0
doa10Δ(H)/WT(L) Rep1	LSTVSPVFVCQSFAK	15	1	Unmodified	_LSTVSPVFVCQSFAK_					0	0	0	0	P23542	P23542	P23542	AAT2	Aspartate aminotransferase, cytoplasmic	ISO-MSMS	1	839.447	2	835.435	1668.85	NaN	NaN	NaN	0.35301	0.00029492	NaN	NaN	NaN	NaN	70.93	0.14919	73.063	72.977	73.127	2.1334								0	0	0
doa10Δ(H)/WT(L) Rep1	LSTVSPVFVCQSFAK	15	1	Unmodified	_LSTVSPVFVCQSFAK_					0	0	0	0	P23542	P23542	P23542	AAT2	Aspartate aminotransferase, cytoplasmic	MULTI-MATCH			2	835.435	1668.85	67717.3	5.6792	0.0047446	-0.15972	-0.00013343	5.5195	0.0046112	835.435	839.442	71.069	0.41516	73.202	72.959	73.375	2.1334	0.58089	-0.00055798	NaN	60.55	70	46	4	NaN	NaN	NaN
doa10Δ(H)/WT(L) Rep1	SLDLNGFLNAIQK	13	1	Unmodified	_SLDLNGFLNAIQK_					0	0	0	0	P23542	P23542	P23542	AAT2	Aspartate aminotransferase, cytoplasmic	ISO-MSMS	0	716.897	2	716.893	1431.77	NaN	NaN	NaN	0.39141	0.0002806	NaN	NaN	NaN	NaN	95.54	0.52951	97.573	97.318	97.847	2.0331								0	0	0
doa10Δ(H)/WT(L) Rep1	TATYPYWANETK	12	1	Unmodified	_TATYPYWANETK_					0	0	0	0	P23542	P23542	P23542	AAT2	Aspartate aminotransferase, cytoplasmic	ISO-MSMS	1	726.852	2	722.841	1443.67	NaN	NaN	NaN	0.2575	0.00018613	NaN	NaN	NaN	NaN	50.948	0.63993	53.081	52.715	53.355	2.1335								0	0	0
doa10Δ(H)/WT(L) Rep1	TIKPAVTSQLAK	12	2	Unmodified	_TIKPAVTSQLAK_					0	0	0	1	P23542	P23542	P23542	AAT2	Aspartate aminotransferase, cytoplasmic	MULTI-MSMS		424.936	3	419.591	1255.75	92757.9	5.4702	0.0022953	-0.00056907	-2.39e-07	5.4697	0.002295	419.591	424.933	26.847	1.0568	28.78	28.288	29.345	1.9329					491	107	7	0	0	0
doa10Δ(H)/WT(L) Rep1	VISVQSLSGTGALHISAK	18	1	Unmodified	_VISVQSLSGTGALHISAK_					0	0	0	0	P23542	P23542	P23542	AAT2	Aspartate aminotransferase, cytoplasmic	MULTI-MSMS		590.007	3	590.004	1766.99	78520.4	5.5642	0.0032829	0.047792	2.82e-05	5.612	0.0033111	590.004	592.675	62.647	1.0877	64.78	64.259	65.347	2.1334					361	109	5	0	0	0
doa10Δ(H)/WT(L) Rep1	VISVQSLSGTGALHISAK	18	1	Unmodified	_VISVQSLSGTGALHISAK_					0	0	0	0	P23542	P23542	P23542	AAT2	Aspartate aminotransferase, cytoplasmic	MULTI-MATCH			3	590.004	1766.99	78524.9	5.593	0.0032999	0.42019	0.00024791	6.0132	0.0035478	590.339	592.675	62.094	0.036926	64.228	64.204	64.241	2.1335	-0.098719	0.0009164	NaN	105	9	3	4	NaN	NaN	NaN
doa10Δ(H)/WT(L) Rep1	RPTSAYFLYLQDHR	14	0	Unmodified	_RPTSAYFLYLQDHR_					0	0	0	1	Q02486	Q02486	Q02486	ABF2	ARS-binding factor 2, mitochondrial	ISO-MSMS	-1	589.975	3	589.637	1765.89	NaN	NaN	NaN	-0.30904	-0.00018222	NaN	NaN	NaN	NaN	53.233	0.32225	55.367	55.155	55.478	2.1335								0	0	0
doa10Δ(H)/WT(L) Rep1	RPTSAYFLYLQDHR	14	0	Unmodified	_RPTSAYFLYLQDHR_					0	0	0	1	Q02486	Q02486	Q02486	ABF2	ARS-binding factor 2, mitochondrial	ISO-MSMS	-1	589.641	3	589.637	1765.89	NaN	NaN	NaN	-0.024174	-1.43e-05	NaN	NaN	NaN	NaN	53.596	0.12214	55.73	55.709	55.831	2.1335								0	0	0
doa10Δ(H)/WT(L) Rep1	RPTSAYFLYLQDHR	14	0	Unmodified	_RPTSAYFLYLQDHR_					0	0	0	1	Q02486	Q02486	Q02486	ABF2	ARS-binding factor 2, mitochondrial	ISO-MSMS	-1	442.733	4	442.48	1765.89	NaN	NaN	NaN	-0.16984	-7.52e-05	NaN	NaN	NaN	NaN	53.922	1.079	56.056	55.356	56.435	2.1335								0	0	0
doa10Δ(H)/WT(L) Rep1	RPTSAYFLYLQDHR	14	0	Unmodified	_RPTSAYFLYLQDHR_					0	0	0	1	Q02486	Q02486	Q02486	ABF2	ARS-binding factor 2, mitochondrial	ISO-MSMS	-1	589.641	3	589.637	1765.89	NaN	NaN	NaN	0.033007	1.95e-05	NaN	NaN	NaN	NaN	54.061	0.51011	56.095	55.942	56.452	2.0333								0	0	0
doa10Δ(H)/WT(L) Rep1	RPTSAYFLYLQDHR	14	0	Unmodified	_RPTSAYFLYLQDHR_					0	0	0	1	Q02486	Q02486	Q02486	ABF2	ARS-binding factor 2, mitochondrial	ISO-MSMS	-1	442.483	4	442.48	1765.89	NaN	NaN	NaN	-0.32608	-0.00014428	NaN	NaN	NaN	NaN	54.348	0.67871	56.381	56.335	57.013	2.0333								0	0	0
doa10Δ(H)/WT(L) Rep1	ASFAANFAAVANNLFK	16	1	Unmodified	_ASFAANFAAVANNLFK_					0	0	0	0	P15891	P15891	P15891	ABP1	Actin-binding protein	MULTI-MSMS		832.443	2	828.431	1654.85	66333	5.5139	0.0045679	0.14733	0.00012205	5.6612	0.0046899	828.43	832.438	106.81	1.1036	108.54	108.14	109.24	1.7324					863	122	9	0	0	0
doa10Δ(H)/WT(L) Rep1	ASFAANFAAVANNLFK	16	1	Unmodified	_ASFAANFAAVANNLFK_					0	0	0	0	P15891	P15891	P15891	ABP1	Actin-binding protein	MULTI-MSMS		555.297	3	552.623	1654.85	79477.8	5.2348	0.0028929	0.13821	7.64e-05	5.373	0.0029692	552.957	555.294	106.81	0.80582	108.54	108.19	108.99	1.7324					538	87	9	0	0	0
doa10Δ(H)/WT(L) Rep1	ASFAANFAAVANNLFK	16	1	Unmodified	_ASFAANFAAVANNLFK_					0	0	0	0	P15891	P15891	P15891	ABP1	Actin-binding protein	MULTI-MATCH			2	828.431	1654.85	66381.6	5.5287	0.0045801	-0.30862	-0.00025567	5.22	0.0043244	828.933	832.939	107.5	0.28833	109.13	109.11	109.4	1.6322	-0.44598	-0.0012241	NaN	151.07	72	31	4	NaN	NaN	NaN
doa10Δ(H)/WT(L) Rep1	DFDQAPLKPNQSSYKPIGK	19	3	Unmodified	_DFDQAPLKPNQSSYKPIGK_					0	0	0	2	P15891	P15891	P15891	ABP1	Actin-binding protein	MULTI-MATCH			4	534.03	2132.09	81680.7	5.3184	0.0028402	-0.1501	-8.02e-05	5.1683	0.00276	534.281	540.291	44.712	0.1669	46.745	46.637	46.804	2.0333	0.24972	-0.00031489	NaN	27.714	61	17	6	NaN	NaN	NaN
doa10Δ(H)/WT(L) Rep1	IDPSSDIANLKNESK	15	2	Unmodified	_IDPSSDIANLKNESK_					0	0	0	1	P15891	P15891	P15891	ABP1	Actin-binding protein	MULTI-MATCH			3	544.281	1629.82	81063.5	5.4618	0.0029727	-0.090509	-4.93e-05	5.3713	0.0029235	544.281	549.624	46.791	0.45147	48.825	48.591	49.042	2.0333	-0.037157	0.00063819	NaN	85.909	202	46	6	NaN	NaN	NaN
doa10Δ(H)/WT(L) Rep1	IDPSSDIANLKNESK	15	2	GlyGly (K)	_IDPSSDIANLK(gl)NESK_	IDPSSDIANLK(0.698)NESK(0.302)		IDPSSDIANLK(3.65)NESK(-3.65)		0	1	0	1	P15891	P15891	P15891	ABP1	Actin-binding protein	MULTI-SECPEP		587	3	582.295	1743.86	78522.1	5.5016	0.0032036	-0.39037	-0.00022731	5.1112	0.0029763	582.295	587.972	50.808	0.46608	52.941	52.678	53.144	2.1335					228	47	8	0	0	0
doa10Δ(H)/WT(L) Rep1	IIIIGWCPDSAPLK	14	1	Unmodified	_IIIIGWCPDSAPLK_					0	0	0	0	P15891	P15891	P15891	ABP1	Actin-binding protein	MULTI-MSMS		791.941	2	791.937	1581.86	67497.5	5.6402	0.0044667	-0.10681	-8.46e-05	5.5334	0.0043821	791.937	795.944	85.293	0.83955	87.526	87.17	88.009	2.2335					566	90	10	0	0	0
doa10Δ(H)/WT(L) Rep1	SSAAPPPPPR	10	0	Unmodified	_SSAAPPPPPR_					0	0	0	0	P15891	P15891	P15891	ABP1	Actin-binding protein	ISO-MSMS	-1	488.766	2	488.764	975.514	NaN	NaN	NaN	0.42315	0.00020682	NaN	NaN	NaN	NaN	16.018	0.44657	17.249	17.043	17.489	1.2313								0	0	0
doa10Δ(H)/WT(L) Rep1	SQEDAEKEYIALVDQLIAK	19	2	Unmodified	_SQEDAEKEYIALVDQLIAK_					0	0	0	1	P31787	P31787	P31787	ACB1	Acyl-CoA-binding protein	MULTI-MATCH			3	721.711	2162.11	71823.1	5.7225	0.00413	0.75349	0.00054381	6.476	0.0046738	722.046	727.053	103.37	0.59604	105.3	105.04	105.63	1.9329	-0.12144	-0.00094997	NaN	35.678	209	63	5	NaN	NaN	NaN
doa10Δ(H)/WT(L) Rep1	VSQLFEEK	8	1	Unmodified	_VSQLFEEK_					0	0	0	0	P31787	P31787	P31787	ACB1	Acyl-CoA-binding protein	MULTI-MATCH			2	490.258	978.502	84653.9	5.4987	0.0026958	-0.4547	-0.00022292	5.044	0.0024728	490.258	494.265	36.288	0.45029	38.321	38.127	38.578	2.0331	-0.23642	-0.00030693	NaN	104.01	135	45	5	NaN	NaN	NaN
doa10Δ(H)/WT(L) Rep1	AHLMGTTYVYDFPELFR	17	0	Unmodified	_AHLMGTTYVYDFPELFR_					0	0	0	0	Q00955	Q00955	Q00955	ACC1	Acetyl-CoA carboxylase;Biotin carboxylase	ISO-MSMS	-1	687.674	3	687.336	2058.99	NaN	NaN	NaN	-0.24699	-0.00016977	NaN	NaN	NaN	NaN	92.152	1.0615	94.285	93.988	95.049	2.1332								0	0	0
doa10Δ(H)/WT(L) Rep1	AYHDIFTITLVTCR	14	0	Unmodified	_AYHDIFTITLVTCR_					0	0	0	0	Q00955	Q00955	Q00955	ACC1	Acetyl-CoA carboxylase;Biotin carboxylase	ISO-MSMS	-1	571.298	3	570.628	1708.86	NaN	NaN	NaN	-1.2529	-0.00071496	NaN	NaN	NaN	NaN	79.518	0.29838	81.752	81.64	81.938	2.2335								0	0	0
doa10Δ(H)/WT(L) Rep1	EILIQGALPSVK	12	1	Unmodified	_EILIQGALPSVK_					0	0	0	0	Q00955	Q00955	Q00955	ACC1	Acetyl-CoA carboxylase;Biotin carboxylase	MULTI-MATCH			2	634.385	1266.75	77713.4	5.4431	0.003453	-0.28511	-0.00018087	5.1579	0.0032721	634.385	638.392	67.574	0.46436	69.707	69.49	69.954	2.1334	0.70419	0.00014736	NaN	37.613	142	47	5	NaN	NaN	NaN
doa10Δ(H)/WT(L) Rep1	ELLPIYGQISLQFADLHDR	19	0	Unmodified	_ELLPIYGQISLQFADLHDR_					0	0	0	0	Q00955	Q00955	Q00955	ACC1	Acetyl-CoA carboxylase;Biotin carboxylase	ISO-MSMS	-1	743.399	3	743.395	2227.16	NaN	NaN	NaN	1.5693	0.0011666	NaN	NaN	NaN	NaN	97.999	0.43861	100.13	99.783	100.22	2.1334								0	0	0
doa10Δ(H)/WT(L) Rep1	GCCTSPEDGLQK	12	1	Unmodified	_GCCTSPEDGLQK_					0	0	0	0	Q00955	Q00955	Q00955	ACC1	Acetyl-CoA carboxylase;Biotin carboxylase	MULTI-MATCH			2	676.284	1350.55	73666.4	5.6214	0.0038016	0.60628	0.00041002	6.2276	0.0042117	676.285	680.793	22.938	0.34647	24.671	24.521	24.867	1.7324	-0.15413	0.00083028	NaN	47.062	82	33	4	NaN	NaN	NaN
doa10Δ(H)/WT(L) Rep1	GSFFETLSGWAK	12	1	Unmodified	_GSFFETLSGWAK_					0	0	0	0	Q00955	Q00955	Q00955	ACC1	Acetyl-CoA carboxylase;Biotin carboxylase	MULTI-MATCH			2	665.327	1328.64	79067.1	5.9686	0.0039711	-0.083175	-5.53e-05	5.8854	0.0039157	665.829	669.835	92.237	0.18099	94.371	94.276	94.457	2.1332	-0.72334	-0.00025617	NaN	40.516	47	19	4	NaN	NaN	NaN
doa10Δ(H)/WT(L) Rep1	HIEPALAFQLELGR	14	0	Unmodified	_HIEPALAFQLELGR_					0	0	0	0	Q00955	Q00955	Q00955	ACC1	Acetyl-CoA carboxylase;Biotin carboxylase	MSMS	-1	531.966	3	531.963	1592.87	NaN	NaN	NaN	NaN	NaN	NaN	NaN	NaN	NaN	75.879	1	78.112	77.612	78.612	2.2335								0	0	0
doa10Δ(H)/WT(L) Rep1	HQSSSNGPAPDR	12	0	Unmodified	_HQSSSNGPAPDR_					0	0	0	0	Q00955	Q00955	Q00955	ACC1	Acetyl-CoA carboxylase;Biotin carboxylase	ISO-MSMS	-1	626.79	2	626.787	1251.56	NaN	NaN	NaN	0.47761	0.00029936	NaN	NaN	NaN	NaN	7.3241	0.11371	8.0542	7.9897	8.1034	0.73012								0	0	0
doa10Δ(H)/WT(L) Rep1	HYQPLCK	7	1	Unmodified	_HYQPLCK_					0	0	0	0	Q00955	Q00955	Q00955	ACC1	Acetyl-CoA carboxylase;Biotin carboxylase	MULTI-MSMS		473.237	2	473.234	944.454	87767.8	5.4966	0.0026012	-0.013117	-6.21e-06	5.4835	0.002595	473.234	477.241	14.276	0.62652	15.508	15.263	15.89	1.2313					212	67	4	0	0	0
doa10Δ(H)/WT(L) Rep1	IIEEAPVTIAKAETFHEMEK	20	2	GlyGly (K)	_IIEEAPVTIAK(gl)AETFHEMEK_					0	1	0	1	Q00955	Q00955	Q00955	ACC1	Acetyl-CoA carboxylase;Biotin carboxylase	MULTI-MATCH			4	600.808	2399.2	76678.3	5.7519	0.0034558	-0.26809	-0.00016107	5.4838	0.0032947	601.059	605.066	64.242	0.38042	66.376	66.203	66.583	2.1334	0.15276	-0.0003702	NaN	42.633	131	40	7	NaN	NaN	NaN
doa10Δ(H)/WT(L) Rep1	ITFMFGFK	8	1	Oxidation (M)	_ITFM(ox)FGFK_		ITFM(1)FGFK		ITFM(65.25)FGFK	0	0	1	0	Q00955	Q00955	Q00955	ACC1	Acetyl-CoA carboxylase;Biotin carboxylase	MULTI-MSMS		507.767	2	503.757	1005.5	84590.3	5.2491	0.0026443	0.1579	7.95e-05	5.407	0.0027238	503.757	507.764	76.459	1.9069	78.692	78.247	80.154	2.2335					702	203	6	0	0	0
doa10Δ(H)/WT(L) Rep1	ITFMFGFK	8	1	Unmodified	_ITFMFGFK_					0	0	0	0	Q00955	Q00955	Q00955	ACC1	Acetyl-CoA carboxylase;Biotin carboxylase	MULTI-MSMS		496.263	2	495.76	989.504	86180.6	5.321	0.0026379	0.018726	9.28e-06	5.3397	0.0026472	495.759	499.766	85.839	1.4712	88.073	87.588	89.059	2.2335					689	157	6	0	0	0
doa10Δ(H)/WT(L) Rep1	ITFMFGFK	8	1	Unmodified	_ITFMFGFK_					0	0	0	0	Q00955	Q00955	Q00955	ACC1	Acetyl-CoA carboxylase;Biotin carboxylase	MULTI-MSMS		499.769	2	495.76	989.504	86439.4	5.3371	0.0026459	-0.0051466	-2.55e-06	5.3319	0.0026433	495.759	499.767	86.373	0.34151	88.606	88.588	88.93	2.2335					140	35	4	0	0	0
doa10Δ(H)/WT(L) Rep1	ITFMFGFK	8	1	Unmodified	_ITFMFGFK_					0	0	0	0	Q00955	Q00955	Q00955	ACC1	Acetyl-CoA carboxylase;Biotin carboxylase	MULTI-MSMS		499.77	2	495.76	989.504	86180.6	5.3601	0.0026573	0.8546	0.00042368	6.2147	0.003081	495.76	499.767	86.723	0.85223	88.956	88.93	89.782	2.2335					319	92	6	0	0	0
doa10Δ(H)/WT(L) Rep1	ITFMFGFK	8	1	Unmodified	_ITFMFGFK_					0	0	0	0	Q00955	Q00955	Q00955	ACC1	Acetyl-CoA carboxylase;Biotin carboxylase	ISO-MSMS	1	499.77	2	495.76	989.504	NaN	NaN	NaN	0.80447	0.00039882	NaN	NaN	NaN	NaN	87.262	0.30843	89.495	89.473	89.782	2.2335								0	0	0
doa10Δ(H)/WT(L) Rep1	NNLILAILK	9	1	Unmodified	_NNLILAILK_					0	0	0	0	Q00955	Q00955	Q00955	ACC1	Acetyl-CoA carboxylase;Biotin carboxylase	MULTI-MSMS		506.334	2	506.332	1010.65	85671.7	5.1083	0.0025865	0.023188	1.17e-05	5.1315	0.0025982	506.332	510.339	86.305	0.79414	88.538	88.135	88.93	2.2335					418	82	6	0	0	0
doa10Δ(H)/WT(L) Rep1	QASSSQWK	8	1	Unmodified	_QASSSQWK_					0	0	0	0	Q00955	Q00955	Q00955	ACC1	Acetyl-CoA carboxylase;Biotin carboxylase	MULTI-MATCH			2	461.225	920.435	90037.3	5.301	0.002445	0.16992	7.84e-05	5.471	0.0025233	461.225	465.232	12.736	0.36891	13.766	13.57	13.939	1.0309	-0.30031	0.00012719	NaN	56.432	111	37	4	NaN	NaN	NaN
doa10Δ(H)/WT(L) Rep1	RITFMFGFK	9	1	Unmodified	_RITFMFGFK_					0	0	0	1	Q00955	Q00955	Q00955	ACC1	Acetyl-CoA carboxylase;Biotin carboxylase	MULTI-MATCH			2	573.81	1145.61	79836.6	5.7144	0.003279	-0.21722	-0.00012464	5.4972	0.0031543	573.81	577.817	74.055	0.22447	76.289	76.206	76.43	2.2335	-0.13165	-0.00053512	NaN	53.08	69	24	4	NaN	NaN	NaN
doa10Δ(H)/WT(L) Rep1	RITFMFGFK	9	1	Unmodified	_RITFMFGFK_					0	0	0	1	Q00955	Q00955	Q00955	ACC1	Acetyl-CoA carboxylase;Biotin carboxylase	MULTI-MATCH			2	573.81	1145.61	78878.7	5.6666	0.0032516	0.058422	3.35e-05	5.7251	0.0032851	573.81	577.817	73.727	0.18631	75.96	75.905	76.091	2.2335	0.10028	-0.000432	NaN	78.939	62	19	4	NaN	NaN	NaN
doa10Δ(H)/WT(L) Rep1	SEESLFESSPQK	12	1	Acetyl (Protein N-term)	_(ac)SEESLFESSPQK_					1	0	0	0	Q00955	Q00955	Q00955	ACC1	Acetyl-CoA carboxylase;Biotin carboxylase	MULTI-MATCH			2	705.325	1408.64	72289.3	5.7846	0.00408	0.22513	0.00015879	6.0097	0.0042388	705.325	709.834	59.324	0.48946	61.357	61.072	61.562	2.0333	-0.25046	-0.00013022	NaN	112.5	222	49	7	NaN	NaN	NaN
doa10Δ(H)/WT(L) Rep1	SLAPEVHQQISK	12	1	Unmodified	_SLAPEVHQQISK_					0	0	0	0	Q00955	Q00955	Q00955	ACC1	Acetyl-CoA carboxylase;Biotin carboxylase	MULTI-MATCH			3	446.245	1335.71	90789.4	5.3249	0.0023762	0.35993	0.00016062	5.6848	0.0025368	446.246	448.917	27.681	0.74182	29.614	29.229	29.971	1.9329	0.035332	-5.65e-05	NaN	38.3	402	78	8	NaN	NaN	NaN
doa10Δ(H)/WT(L) Rep1	SSSNVWGYFSVGNNGNIHSFSDSQFGHIFAFGENR	35	0	Unmodified	_SSSNVWGYFSVGNNGNIHSFSDSQFGHIFAFGENR_					0	0	0	0	Q00955	Q00955	Q00955	ACC1	Acetyl-CoA carboxylase;Biotin carboxylase	ISO-MSMS	-1	967.196	4	967.19	3864.73	NaN	NaN	NaN	-0.02889	-2.79e-05	NaN	NaN	NaN	NaN	99.462	0.32806	101.6	101.51	101.84	2.1334								0	0	0
doa10Δ(H)/WT(L) Rep1	SVGIGAYLVR	10	0	Unmodified	_SVGIGAYLVR_					0	0	0	0	Q00955	Q00955	Q00955	ACC1	Acetyl-CoA carboxylase;Biotin carboxylase	ISO-MSMS	-1	517.805	2	517.803	1033.59	NaN	NaN	NaN	0.40646	0.00021046	NaN	NaN	NaN	NaN	62.047	0.80185	64.181	63.877	64.679	2.1335								0	0	0
doa10Δ(H)/WT(L) Rep1	TGLVSVDDDIYQK	13	1	Unmodified	_TGLVSVDDDIYQK_					0	0	0	0	Q00955	Q00955	Q00955	ACC1	Acetyl-CoA carboxylase;Biotin carboxylase	MULTI-MSMS		730.876	2	726.864	1451.71	70772.8	5.9159	0.0043001	0.02873	2.09e-05	5.9446	0.0043209	726.864	730.872	56.571	0.46718	58.605	58.4	58.867	2.0333					198	46	6	0	0	0
doa10Δ(H)/WT(L) Rep1	TIIGSEDGLGVECLR	15	0	Unmodified	_TIIGSEDGLGVECLR_					0	0	0	0	Q00955	Q00955	Q00955	ACC1	Acetyl-CoA carboxylase;Biotin carboxylase	ISO-MSMS	-1	809.913	2	809.909	1617.8	NaN	NaN	NaN	0.16556	0.00013409	NaN	NaN	NaN	NaN	66.575	0.40378	68.708	68.455	68.859	2.1334								0	0	0
doa10Δ(H)/WT(L) Rep1	TVINGEER	8	0	Unmodified	_TVINGEER_					0	0	0	0	Q00955	Q00955	Q00955	ACC1	Acetyl-CoA carboxylase;Biotin carboxylase	ISO-MSMS	-1	459.241	2	459.238	916.461	NaN	NaN	NaN	1.2527	0.00057528	NaN	NaN	NaN	NaN	15.979	0.33684	17.211	17.135	17.472	1.2313								0	0	0
doa10Δ(H)/WT(L) Rep1	VPCIPWSGTGVDTVHVDEK	19	1	Unmodified	_VPCIPWSGTGVDTVHVDEK_					0	0	0	0	Q00955	Q00955	Q00955	ACC1	Acetyl-CoA carboxylase;Biotin carboxylase	ISO-MSMS	1	702.017	3	699.342	2095	NaN	NaN	NaN	0.27789	0.00019434	NaN	NaN	NaN	NaN	67.339	0.50694	69.473	69.259	69.766	2.1334								0	0	0
doa10Δ(H)/WT(L) Rep1	YTLFINGSK	9	1	Unmodified	_YTLFINGSK_					0	0	0	0	Q00955	Q00955	Q00955	ACC1	Acetyl-CoA carboxylase;Biotin carboxylase	ISO-MSMS	1	526.294	2	521.782	1041.55	NaN	NaN	NaN	-0.10308	-5.38e-05	NaN	NaN	NaN	NaN	55	0.4767	57.034	56.793	57.269	2.0333								0	0	0
doa10Δ(H)/WT(L) Rep1	FYFLELNPR	9	0	Unmodified	_FYFLELNPR_					0	0	0	0	Q00955;P32874	Q00955	Q00955	ACC1;HFA1	Acetyl-CoA carboxylase;Biotin carboxylase;Acetyl-CoA carboxylase, mitochondrial;Biotin carboxylase	ISO-MSMS	-1	599.819	2	599.816	1197.62	NaN	NaN	NaN	0.096639	5.8e-05	NaN	NaN	NaN	NaN	83.049	0.72206	85.283	84.969	85.691	2.2335								0	0	0
doa10Δ(H)/WT(L) Rep1	ILIANNGIAAVK	12	1	Unmodified	_ILIANNGIAAVK_					0	0	0	0	Q00955;P32874	Q00955	Q00955	ACC1;HFA1	Acetyl-CoA carboxylase;Biotin carboxylase;Acetyl-CoA carboxylase, mitochondrial;Biotin carboxylase	MULTI-MATCH			2	598.872	1195.73	84629.9	5.6518	0.0033847	0.30048	0.00017995	5.9523	0.0035647	598.872	602.879	51.872	0.29456	54.006	53.827	54.121	2.1335	1.0527	-0.00014269	NaN	46.844	73	29	4	NaN	NaN	NaN
doa10Δ(H)/WT(L) Rep1	ISSTIVAQSAK	11	1	Unmodified	_ISSTIVAQSAK_					0	0	0	0	Q00955;P32874	Q00955	Q00955	ACC1;HFA1	Acetyl-CoA carboxylase;Biotin carboxylase;Acetyl-CoA carboxylase, mitochondrial;Biotin carboxylase	MULTI-MATCH			2	552.817	1103.62	79792.6	5.5448	0.0030652	0.026473	1.46e-05	5.5712	0.0030799	552.817	556.824	26.88	0.49063	28.813	28.614	29.104	1.9329	0.29439	-1.27e-05	NaN	72.289	216	48	6	NaN	NaN	NaN
doa10Δ(H)/WT(L) Rep1	ILQEKVYR	8	1	GlyGly (K)	_ILQEK(gl)VYR_	ILQEK(1)VYR		ILQEK(106.36)VYR		0	1	0	1	Q07622	Q07622	Q07622	ACK1	Activator of C kinase protein 1	MULTI-MSMS		585.841	2	581.833	1161.65	77745.5	5.4162	0.0031513	0.017079	9.94e-06	5.4333	0.0031613	581.833	585.84	25.295	0.65831	27.128	26.861	27.519	1.8327					372	64	8	0	0	0
doa10Δ(H)/WT(L) Rep1	TEEKAPIRPLNNNPVPPQK	19	2	GlyGly (K)	_TEEK(gl)APIRPLNNNPVPPQK_	TEEK(0.956)APIRPLNNNPVPPQK(0.044)		TEEK(13.36)APIRPLNNNPVPPQK(-13.36)		0	1	0	2	Q07622	Q07622	Q07622	ACK1	Activator of C kinase protein 1	MULTI-MSMS		569.319	4	564.808	2255.2	77900.7	5.4631	0.0030856	-0.073623	-4.16e-05	5.3895	0.003044	565.058	568.815	32.899	0.31478	34.932	34.752	35.067	2.0331					153	33	7	0	0	0
doa10Δ(H)/WT(L) Rep1	FLGGFAIITK	10	1	Unmodified	_FLGGFAIITK_					0	0	0	0	P19414	P19414	P19414	ACO1	Aconitate hydratase, mitochondrial	MULTI-MSMS		533.821	2	533.818	1065.62	81464.9	5.2854	0.0028214	-0.12755	-6.81e-05	5.1578	0.0027533	533.818	537.825	77.308	2.0842	79.542	79.041	81.125	2.2335					1343	220	10	0	0	0
doa10Δ(H)/WT(L) Rep1	NTIVSSYNR	9	0	Unmodified	_NTIVSSYNR_					0	0	0	0	P19414	P19414	P19414	ACO1	Aconitate hydratase, mitochondrial	ISO-MSMS	-1	527.273	2	527.27	1052.53	NaN	NaN	NaN	0.21495	0.00011334	NaN	NaN	NaN	NaN	26.119	0.43492	28.051	27.853	28.288	1.9329								0	0	0
doa10Δ(H)/WT(L) Rep1	SMIEYLEATGR	11	0	Unmodified	_SMIEYLEATGR_					0	0	0	0	P19414	P19414	P19414	ACO1	Aconitate hydratase, mitochondrial	ISO-MSMS	-1	635.313	2	635.311	1268.61	NaN	NaN	NaN	-0.29073	-0.0001847	NaN	NaN	NaN	NaN	68.792	0.57049	70.925	70.7	71.27	2.1334								0	0	0
doa10Δ(H)/WT(L) Rep1	TIFTVTPGSEQIR	13	0	Unmodified	_TIFTVTPGSEQIR_					0	0	0	0	P19414	P19414	P19414	ACO1	Aconitate hydratase, mitochondrial	ISO-MSMS	-1	724.894	2	724.891	1447.77	NaN	NaN	NaN	-0.17762	-0.00012876	NaN	NaN	NaN	NaN	58.28	0.8134	60.313	60.026	60.84	2.0333								0	0	0
doa10Δ(H)/WT(L) Rep1	TTTDHISMAGPWLK	14	1	Unmodified	_TTTDHISMAGPWLK_					0	0	0	0	P19414	P19414	P19414	ACO1	Aconitate hydratase, mitochondrial	MULTI-MSMS		519.933	3	519.929	1556.77	80998.3	5.3275	0.0027699	0.05997	3.12e-05	5.3874	0.0028011	519.929	522.601	60.798	0.61612	62.932	62.591	63.207	2.1335					300	64	7	0	0	0
doa10Δ(H)/WT(L) Rep1	VGLIGSCTNSSYEDMSR	17	0	Unmodified	_VGLIGSCTNSSYEDMSR_					0	0	0	0	P19414	P19414	P19414	ACO1	Aconitate hydratase, mitochondrial	ISO-MSMS	-1	938.42	2	938.414	1874.81	NaN	NaN	NaN	-0.27738	-0.0002603	NaN	NaN	NaN	NaN	54.459	0.54803	56.492	56.315	56.863	2.0333								0	0	0
doa10Δ(H)/WT(L) Rep1	VNQNLLEDHSFINYK	15	1	Unmodified	_VNQNLLEDHSFINYK_					0	0	0	0	P19414	P19414	P19414	ACO1	Aconitate hydratase, mitochondrial	MULTI-MATCH			3	611.976	1832.91	75106.2	5.4316	0.003324	-0.22699	-0.00013892	5.2046	0.0031851	612.311	614.647	62.376	0.63617	64.509	64.131	64.767	2.1334	-0.16691	-0.00015626	NaN	40.88	171	63	5	NaN	NaN	NaN
doa10Δ(H)/WT(L) Rep1	WVVIGDENFGEGSSR	15	0	Unmodified	_WVVIGDENFGEGSSR_					0	0	0	0	P19414	P19414	P19414	ACO1	Aconitate hydratase, mitochondrial	ISO-MSMS	-1	827.398	2	826.389	1650.76	NaN	NaN	NaN	-0.01104	-9.12e-06	NaN	NaN	NaN	NaN	70.785	0.49726	72.918	72.672	73.17	2.1334								0	0	0
doa10Δ(H)/WT(L) Rep1	ETNTIFTSFNR	11	0	Unmodified	_ETNTIFTSFNR_					0	0	0	0	P39533	P39533	P39533	ACO2	Homocitrate dehydratase, mitochondrial	ISO-MSMS	-1	665.33	2	665.325	1328.64	NaN	NaN	NaN	-0.070476	-4.69e-05	NaN	NaN	NaN	NaN	62.667	0.55766	64.8	64.571	65.128	2.1334								0	0	0
doa10Δ(H)/WT(L) Rep1	FLGGEILLVK	10	1	Unmodified	_FLGGEILLVK_					0	0	0	0	P39533	P39533	P39533	ACO2	Homocitrate dehydratase, mitochondrial	MULTI-MATCH			2	544.839	1087.66	82312	5.586	0.0030434	-0.020316	-1.11e-05	5.5656	0.0030324	544.839	548.846	78.104	0.81757	80.338	80.028	80.846	2.2335	0.61834	0.00019625	NaN	42.802	229	84	4	NaN	NaN	NaN
doa10Δ(H)/WT(L) Rep1	ILYSHLCDPEESITSSDLSTIR	22	0	Unmodified	_ILYSHLCDPEESITSSDLSTIR_					0	0	0	0	P39533	P39533	P39533	ACO2	Homocitrate dehydratase, mitochondrial	MSMS	-1	846.083	3	846.079	2535.22	NaN	NaN	NaN	NaN	NaN	NaN	NaN	NaN	NaN	71.758	1	73.891	73.391	74.391	2.1334								0	0	0
doa10Δ(H)/WT(L) Rep1	VSAGLIGSCTNSSYQDMSR	19	0	Unmodified	_VSAGLIGSCTNSSYQDMSR_					0	0	0	0	P39533	P39533	P39533	ACO2	Homocitrate dehydratase, mitochondrial	ISO-MSMS	-1	1017.46	2	1016.96	2031.9	NaN	NaN	NaN	0.1747	0.00017767	NaN	NaN	NaN	NaN	52.13	0.19319	54.263	54.131	54.324	2.1335								0	0	0
doa10Δ(H)/WT(L) Rep1	SFARIHETNLK	11	1	Unmodified	_SFARIHETNLK_					0	0	0	1	P39533;P19414	P39533;P19414	P19414	ACO2;ACO1	Homocitrate dehydratase, mitochondrial;Aconitate hydratase, mitochondrial	MULTI-MATCH			3	439.242	1314.7	89146.4	5.3405	0.0023458	0.0063499	2.79e-06	5.3469	0.0023486	439.242	441.913	24.119	0.88354	25.951	25.64	26.524	1.8327	0.23689	-0.00026865	NaN	35.178	243	88	5	NaN	NaN	NaN
doa10Δ(H)/WT(L) Rep1	APQHFYNSQPGK	12	1	Unmodified	_APQHFYNSQPGK_					0	0	0	0	P52910	P52910	P52910	ACS2	Acetyl-coenzyme A synthetase 2	MULTI-MATCH			3	458.558	1372.65	88781.3	5.3904	0.0024718	0.47397	0.00021734	5.8644	0.0026892	458.558	461.23	19.322	0.57607	20.754	20.506	21.082	1.4318	-0.4631	0.00033724	NaN	43.502	135	62	6	NaN	NaN	NaN
doa10Δ(H)/WT(L) Rep1	DGYLQNNATEGDAEHITPDNLR	22	0	Unmodified	_DGYLQNNATEGDAEHITPDNLR_					0	0	0	0	P52910	P52910	P52910	ACS2	Acetyl-coenzyme A synthetase 2	ISO-MSMS	-1	815.048	3	815.042	2442.1	NaN	NaN	NaN	0.040263	3.28e-05	NaN	NaN	NaN	NaN	55.949	0.36297	57.982	57.805	58.168	2.0333								0	0	0
doa10Δ(H)/WT(L) Rep1	GGKTINTK	8	2	GlyGly (K)	_GGK(gl)TINTK_					0	1	0	1	P52910	P52910	P52910	ACS2	Acetyl-coenzyme A synthetase 2	MULTI-MATCH			2	466.762	931.509	87762.1	4.946	0.0023086	-0.52577	-0.00024541	4.4202	0.0020632	466.761	474.776	7.2309	0.18411	7.961	7.8561	8.0402	0.73012	0.17013	-0.00031311	NaN	107.69	53	18	6	NaN	NaN	NaN
doa10Δ(H)/WT(L) Rep1	GVVHTTGGYLLGAALTTR	18	0	Unmodified	_GVVHTTGGYLLGAALTTR_					0	0	0	0	P52910	P52910	P52910	ACS2	Acetyl-coenzyme A synthetase 2	MSMS	-1	596.336	3	596.332	1785.97	NaN	NaN	NaN	NaN	NaN	NaN	NaN	NaN	NaN	64.764	1	66.898	66.398	67.398	2.1334								0	0	0
doa10Δ(H)/WT(L) Rep1	IGAIHSVVFAGFSAGSLK	18	1	Unmodified	_IGAIHSVVFAGFSAGSLK_					0	0	0	0	P52910	P52910	P52910	ACS2	Acetyl-coenzyme A synthetase 2	MULTI-MATCH			3	587.661	1759.96	79141.1	5.6183	0.0033017	-0.12596	-7.4e-05	5.4923	0.0032276	587.995	590.333	73.371	0.62398	75.605	75.381	76.005	2.2335	-0.0017446	-0.00060148	NaN	36.752	136	67	4	NaN	NaN	NaN
doa10Δ(H)/WT(L) Rep1	IGAIHSVVFAGFSAGSLKDR	20	1	Unmodified	_IGAIHSVVFAGFSAGSLKDR_					0	0	0	1	P52910	P52910	P52910	ACS2	Acetyl-coenzyme A synthetase 2	ISO-MSMS	0	509.033	4	508.78	2031.09	NaN	NaN	NaN	0.21144	0.00010758	NaN	NaN	NaN	NaN	66.189	0.45309	68.323	68.09	68.543	2.1334								0	0	0
doa10Δ(H)/WT(L) Rep1	IGAIHSVVFAGFSAGSLKDR	20	1	Unmodified	_IGAIHSVVFAGFSAGSLKDR_					0	0	0	1	P52910	P52910	P52910	ACS2	Acetyl-coenzyme A synthetase 2	MULTI-MATCH			4	508.78	2031.09	84677.4	4.8284	0.0024566	-0.29498	-0.00015008	4.5334	0.0023065	508.78	510.783	65.93	0.21548	68.063	67.998	68.213	2.1334	0.023102	-0.0012128	NaN	90.453	51	26	5	NaN	NaN	NaN
doa10Δ(H)/WT(L) Rep1	LNASYNCVDR	10	0	Unmodified	_LNASYNCVDR_					0	0	0	0	P52910	P52910	P52910	ACS2	Acetyl-coenzyme A synthetase 2	ISO-MSMS	-1	606.281	2	606.277	1210.54	NaN	NaN	NaN	0.15924	9.65e-05	NaN	NaN	NaN	NaN	28.933	0.52204	30.866	30.59	31.112	1.9329								0	0	0
doa10Δ(H)/WT(L) Rep1	SPWPSMAR	8	0	Unmodified	_SPWPSMAR_					0	0	0	0	P52910	P52910	P52910	ACS2	Acetyl-coenzyme A synthetase 2	ISO-MSMS	-1	466.229	2	466.226	930.438	NaN	NaN	NaN	0.036442	1.7e-05	NaN	NaN	NaN	NaN	46.51	1.4055	48.544	47.828	49.233	2.0333								0	0	0
doa10Δ(H)/WT(L) Rep1	TGTEGIPMK	9	1	Unmodified	_TGTEGIPMK_					0	0	0	0	P52910	P52910	P52910	ACS2	Acetyl-coenzyme A synthetase 2	MULTI-MSMS		467.241	2	467.239	932.464	88980.1	5.4121	0.0025287	-0.025258	-1.18e-05	5.3868	0.0025169	467.239	471.246	27.152	0.49752	29.085	28.847	29.345	1.9329					245	50	6	0	0	0
doa10Δ(H)/WT(L) Rep1	TYLPPVSCDAEDPLFLLYTSGSTGSPK	27	1	Unmodified	_TYLPPVSCDAEDPLFLLYTSGSTGSPK_					0	0	0	0	P52910	P52910	P52910	ACS2	Acetyl-coenzyme A synthetase 2	MULTI-MSMS		973.06	3	972.472	2914.39	60756.9	5.0542	0.0049151	-0.39273	-0.00038192	4.6615	0.0045331	972.806	975.477	103.35	0.82127	105.28	104.91	105.73	1.9329					513	86	10	0	0	0
doa10Δ(H)/WT(L) Rep1	VLGSVGEPISPDLWEWYHEK	20	1	Unmodified	_VLGSVGEPISPDLWEWYHEK_					0	0	0	0	P52910	P52910	P52910	ACS2	Acetyl-coenzyme A synthetase 2	MULTI-MATCH			3	781.055	2340.14	68501.2	5.7995	0.0045298	0.98766	0.00077142	6.7872	0.0053012	781.389	783.73	87.894	0.37851	90.027	89.874	90.253	2.1332	0.21694	0.001844	NaN	36.637	131	39	6	NaN	NaN	NaN
doa10Δ(H)/WT(L) Rep1	VQSGSLNNGDVAWFLNGK	18	1	Unmodified	_VQSGSLNNGDVAWFLNGK_					0	0	0	0	P52910	P52910	P52910	ACS2	Acetyl-coenzyme A synthetase 2	MULTI-MATCH			2	953.476	1904.94	61541.6	5.7468	0.0054794	-0.32543	-0.00031029	5.4214	0.0051691	953.476	957.985	80.437	0.36294	82.671	82.462	82.825	2.2335	-0.30385	-0.0014262	NaN	62.94	118	38	4	NaN	NaN	NaN
doa10Δ(H)/WT(L) Rep1	YDTSSLR	7	0	Unmodified	_YDTSSLR_					0	0	0	0	P52910	P52910	P52910	ACS2	Acetyl-coenzyme A synthetase 2	ISO-MSMS	-1	421.21	2	421.206	840.398	NaN	NaN	NaN	-0.30153	-0.00012701	NaN	NaN	NaN	NaN	25.824	0.32923	27.657	27.509	27.838	1.8327								0	0	0
doa10Δ(H)/WT(L) Rep1	APEALFHPSVLGLESAGIDQTTYNSIMK	28	1	Unmodified	_APEALFHPSVLGLESAGIDQTTYNSIMK_					0	0	0	0	P60010	P60010	P60010	ACT1	Actin	MSMS	0	997.268	3	997.171	2988.49	NaN	NaN	NaN	NaN	NaN	NaN	NaN	NaN	NaN	91.278	1	93.411	92.911	93.911	2.1332								0	0	0
doa10Δ(H)/WT(L) Rep1	DLTDYLMK	8	1	Unmodified	_DLTDYLMK_					0	0	0	0	P60010	P60010	P60010	ACT1	Actin	MULTI-MSMS		499.75	2	499.747	997.479	86572.5	5.579	0.0027881	0.030858	1.54e-05	5.6098	0.0028035	499.747	503.754	73.639	0.58617	75.872	75.591	76.177	2.2335					225	62	5	0	0	0
doa10Δ(H)/WT(L) Rep1	DSYVGDEAQSK	11	1	Unmodified	_DSYVGDEAQSK_					0	0	0	0	P60010	P60010	P60010	ACT1	Actin	MULTI-MSMS		599.769	2	599.765	1197.51	77209.1	5.7056	0.003422	0.37448	0.0002246	6.0801	0.0036466	599.765	603.772	21.926	0.50664	23.658	23.42	23.927	1.7324					269	49	8	0	0	0
doa10Δ(H)/WT(L) Rep1	DSYVGDEAQSKR	12	1	Unmodified	_DSYVGDEAQSKR_					0	0	0	1	P60010	P60010	P60010	ACT1	Actin	MULTI-MSMS		677.818	2	677.815	1353.62	72985.4	5.5597	0.0037685	0.83008	0.00056264	6.3898	0.0043311	677.815	681.822	18.069	0.40067	19.4	19.225	19.625	1.3316					131	39	6	0	0	0
doa10Δ(H)/WT(L) Rep1	DSYVGDEAQSKR	12	1	GlyGly (K)	_DSYVGDEAQSK(gl)R_					0	1	0	1	P60010	P60010	P60010	ACT1	Actin	MULTI-MATCH			3	490.227	1467.66	86514.1	5.4141	0.0026541	-0.29351	-0.00014389	5.1206	0.0025102	490.227	492.898	20.647	0.4074	22.179	21.961	22.368	1.5321	-0.47295	-0.0003584	NaN	95.618	164	41	6	NaN	NaN	NaN
doa10Δ(H)/WT(L) Rep1	EITALAPSSMK	11	1	Unmodified	_EITALAPSSMK_					0	0	0	0	P60010	P60010	P60010	ACT1	Actin	MULTI-MSMS		574.307	2	574.305	1146.6	77201.8	5.3341	0.0030634	0.53576	0.00030769	5.8698	0.0033711	574.306	578.312	45.224	0.60699	47.258	46.961	47.568	2.0333					296	68	7	0	0	0
doa10Δ(H)/WT(L) Rep1	EITALAPSSMK	11	1	Oxidation (M)	_EITALAPSSM(ox)K_		EITALAPSSM(1)K		EITALAPSSM(61.34)K	0	0	1	0	P60010	P60010	P60010	ACT1	Actin	ISO-MSMS	1	586.813	2	582.302	1162.59	NaN	NaN	NaN	0.40466	0.00023563	NaN	NaN	NaN	NaN	33.425	0.53394	35.458	35.166	35.7	2.0331								0	0	0
doa10Δ(H)/WT(L) Rep1	EITALAPSSMKVK	13	2	GlyGly (K)	_EITALAPSSMK(gl)VK_	EITALAPSSMK(0.746)VK(0.254)		EITALAPSSMK(4.68)VK(-4.68)		0	1	0	1	P60010	P60010	P60010	ACT1	Actin	MULTI-MSMS		502.286	3	496.941	1487.8	83510.5	5.3499	0.0026586	-0.25526	-0.00012685	5.0946	0.0025317	496.941	502.284	44.038	0.78861	46.072	45.565	46.354	2.0333					326	80	7	0	0	0
doa10Δ(H)/WT(L) Rep1	ELYGNIVMSGGTTMFPGIAER	21	0	Unmodified	_ELYGNIVMSGGTTMFPGIAER_					0	0	0	0	P60010	P60010	P60010	ACT1	Actin	ISO-MSMS	-1	748.369	3	748.366	2242.08	NaN	NaN	NaN	-0.20546	-0.00015376	NaN	NaN	NaN	NaN	91.293	0.76169	93.426	93.147	93.908	2.1332								0	0	0
doa10Δ(H)/WT(L) Rep1	ELYGNIVMSGGTTMFPGIAER	21	0	Unmodified	_ELYGNIVMSGGTTMFPGIAER_					0	0	0	0	P60010	P60010	P60010	ACT1	Actin	ISO-MSMS	-1	1122.05	2	1122.05	2242.08	NaN	NaN	NaN	0.3358	0.00037678	NaN	NaN	NaN	NaN	91.371	0.53637	93.505	93.209	93.745	2.1332								0	0	0
doa10Δ(H)/WT(L) Rep1	FRAPEALFHPSVLGLESAGIDQTTYNSIMK	30	1	Unmodified	_FRAPEALFHPSVLGLESAGIDQTTYNSIMK_					0	0	0	1	P60010	P60010	P60010	ACT1	Actin	MULTI-MATCH			4	823.922	3291.66	67529	5.8695	0.004836	-0.32539	-0.0002681	5.5441	0.0045679	824.172	826.427	90.1	0.32598	92.233	92.11	92.436	2.1332	0.0012839	-0.00079056	NaN	24.866	88	35	6	NaN	NaN	NaN
doa10Δ(H)/WT(L) Rep1	FRAPEALFHPSVLGLESAGIDQTTYNSIMK	30	1	Unmodified	_FRAPEALFHPSVLGLESAGIDQTTYNSIMK_					0	0	0	1	P60010	P60010	P60010	ACT1	Actin	MULTI-MATCH			4	823.922	3291.66	67367.8	5.8876	0.0048509	-0.81884	-0.00067466	5.0687	0.0041762	824.172	826.426	89.677	0.24867	91.811	91.625	91.874	2.1332	0.077548	-0.0032151	NaN	31.566	81	25	6	NaN	NaN	NaN
doa10Δ(H)/WT(L) Rep1	GYSFSTTAER	10	0	Unmodified	_GYSFSTTAER_					0	0	0	0	P60010	P60010	P60010	ACT1	Actin	ISO-MSMS	-1	559.762	2	559.759	1117.5	NaN	NaN	NaN	-0.052186	-2.92e-05	NaN	NaN	NaN	NaN	35.373	0.67915	37.406	37.13	37.809	2.0331								0	0	0
doa10Δ(H)/WT(L) Rep1	HQGIMVGMGQK	11	1	Unmodified	_HQGIMVGMGQK_					0	0	0	0	P60010	P60010	P60010	ACT1	Actin	ISO-MSMS	0	593.3	2	593.297	1184.58	NaN	NaN	NaN	-0.86298	-0.000512	NaN	NaN	NaN	NaN	27.678	0.27747	29.611	29.394	29.671	1.9329								0	0	0
doa10Δ(H)/WT(L) Rep1	KELYGNIVMSGGTTMFPGIAER	22	1	Unmodified	_KELYGNIVMSGGTTMFPGIAER_					0	0	0	1	P60010	P60010	P60010	ACT1	Actin	MULTI-MSMS		794.074	3	791.064	2370.17	68010.7	6.0394	0.0047776	-0.57112	-0.00045179	5.4683	0.0043258	791.398	794.069	79.306	0.74107	81.539	81.142	81.883	2.2335					347	77	7	0	0	0
doa10Δ(H)/WT(L) Rep1	LCYVALDFEQEMQTAAQSSSIEK	23	1	Unmodified	_LCYVALDFEQEMQTAAQSSSIEK_					0	0	0	0	P60010	P60010	P60010	ACT1	Actin	ISO-MSMS	0	883.418	3	883.412	2647.21	NaN	NaN	NaN	-0.77463	-0.00068432	NaN	NaN	NaN	NaN	95.581	0.20063	97.614	97.538	97.739	2.0331								0	0	0
doa10Δ(H)/WT(L) Rep1	SYELPDGQVITIGNER	16	0	Unmodified	_SYELPDGQVITIGNER_					0	0	0	0	P60010	P60010	P60010	ACT1	Actin	ISO-MSMS	-1	895.955	2	895.95	1789.88	NaN	NaN	NaN	0.236	0.00021144	NaN	NaN	NaN	NaN	75.323	0.96959	77.557	77.005	77.975	2.2335								0	0	0
doa10Δ(H)/WT(L) Rep1	TTGIVLDSGDGVTHVVPIYAGFSLPHAILR	30	0	Unmodified	_TTGIVLDSGDGVTHVVPIYAGFSLPHAILR_					0	0	0	0	P60010	P60010	P60010	ACT1	Actin	ISO-MSMS	-1	777.43	4	777.174	3104.67	NaN	NaN	NaN	0.10893	8.47e-05	NaN	NaN	NaN	NaN	94.263	0.21284	96.396	96.224	96.437	2.1332								0	0	0
doa10Δ(H)/WT(L) Rep1	VAPEEHPVLLTEAPMNPKSNR	21	1	GlyGly (K)	_VAPEEHPVLLTEAPMNPK(gl)SNR_					0	1	0	1	P60010	P60010	P60010	ACT1	Actin	MULTI-MATCH			4	611.565	2442.23	75830.8	5.5017	0.0033647	-0.63001	-0.0003853	4.8717	0.0029794	611.816	613.82	47.351	0.45033	49.384	49.12	49.57	2.0333	0.30719	-0.00083111	NaN	52.814	222	48	7	NaN	NaN	NaN
doa10Δ(H)/WT(L) Rep1	AKYIEAYETLTGSK	14	2	GlyGly (K)	_AK(gl)YIEAYETLTGSK_					0	1	0	1	P27616	P27616	P27616	ADE1	Phosphoribosylaminoimidazole-succinocarboxamide synthase	MULTI-MATCH			3	563.289	1686.85	80524.8	5.4666	0.0030793	0.02692	1.52e-05	5.4935	0.0030945	563.624	568.632	55.619	0.57076	57.652	57.428	57.999	2.0333	-0.66191	-0.00022052	NaN	51.771	112	64	4	NaN	NaN	NaN
doa10Δ(H)/WT(L) Rep1	TIFDYLPAK	9	1	Unmodified	_TIFDYLPAK_					0	0	0	0	P27616	P27616	P27616	ADE1	Phosphoribosylaminoimidazole-succinocarboxamide synthase	MULTI-MATCH			2	534.292	1066.57	82635.4	5.7105	0.0030511	0.093579	5e-05	5.8041	0.0031011	534.292	538.299	75.199	0.62758	77.433	77.177	77.804	2.2335	0.1103	0.00019973	NaN	55.064	212	65	5	NaN	NaN	NaN
doa10Δ(H)/WT(L) Rep1	YDFHMLPSGLVNPNCQNLLGNGVVIHVPSFFK	32	1	Unmodified	_YDFHMLPSGLVNPNCQNLLGNGVVIHVPSFFK_					0	0	0	0	P80210	P80210	P80210	ADE12	Adenylosuccinate synthetase	MULTI-MSMS		906.466	4	904.208	3612.8	62718.1	5.0449	0.0045616	0.64435	0.00058263	5.6893	0.0051443	904.71	906.463	105.12	0.61018	106.95	106.59	107.2	1.8327					394	68	13	0	0	0
doa10Δ(H)/WT(L) Rep1	YDFHMLPSGLVNPNCQNLLGNGVVIHVPSFFK	32	1	Unmodified	_YDFHMLPSGLVNPNCQNLLGNGVVIHVPSFFK_					0	0	0	0	P80210	P80210	P80210	ADE12	Adenylosuccinate synthetase	MULTI-MSMS		904.712	4	904.208	3612.8	62652.9	5.0678	0.0045823	0.64688	0.00058491	5.7147	0.0051673	904.459	906.463	105.42	0.27101	107.26	107.14	107.41	1.8327					287	29	16	0	0	0
doa10Δ(H)/WT(L) Rep1	YDFHMLPSGLVNPNCQNLLGNGVVIHVPSFFK	32	1	Unmodified	_YDFHMLPSGLVNPNCQNLLGNGVVIHVPSFFK_					0	0	0	0	P80210	P80210	P80210	ADE12	Adenylosuccinate synthetase	MULTI-MSMS		904.713	4	904.208	3612.8	62724.2	5.1509	0.0046575	0.20551	0.00018583	5.3564	0.0048433	904.709	906.463	106.36	0.18667	108.09	107.99	108.18	1.7324					153	20	14	0	0	0
doa10Δ(H)/WT(L) Rep1	YDFHMLPSGLVNPNCQNLLGNGVVIHVPSFFK	32	1	Unmodified	_YDFHMLPSGLVNPNCQNLLGNGVVIHVPSFFK_					0	0	0	0	P80210	P80210	P80210	ADE12	Adenylosuccinate synthetase	MULTI-MSMS		906.468	4	904.208	3612.8	62409.9	5.1775	0.0046816	0.10585	9.57e-05	5.2834	0.0047773	904.709	906.463	106.66	0.62977	108.39	108.16	108.79	1.7324					364	68	12	0	0	0
doa10Δ(H)/WT(L) Rep1	YDFHMLPSGLVNPNCQNLLGNGVVIHVPSFFK	32	1	Unmodified	_YDFHMLPSGLVNPNCQNLLGNGVVIHVPSFFK_					0	0	0	0	P80210	P80210	P80210	ADE12	Adenylosuccinate synthetase	MULTI-SECPEP		906.717	4	904.208	3612.8	62718	5.1184	0.0046281	0.30421	0.00027507	5.4226	0.0049031	904.709	906.713	106.03	0.24701	107.76	107.6	107.85	1.7324					188	27	13	0	0	0
doa10Δ(H)/WT(L) Rep1	YDFHMLPSGLVNPNCQNLLGNGVVIHVPSFFK	32	1	Unmodified	_YDFHMLPSGLVNPNCQNLLGNGVVIHVPSFFK_					0	0	0	0	P80210	P80210	P80210	ADE12	Adenylosuccinate synthetase	MULTI-MATCH			4	904.208	3612.8	62724.3	5.2203	0.0047203	0.41983	0.00037961	5.6402	0.0050999	904.71	906.464	107.14	0.26212	108.87	108.73	108.99	1.7324	-0.11954	0.00079712	NaN	75.416	158	28	12	NaN	NaN	NaN
doa10Δ(H)/WT(L) Rep1	YDFHMLPSGLVNPNCQNLLGNGVVIHVPSFFK	32	1	Unmodified	_YDFHMLPSGLVNPNCQNLLGNGVVIHVPSFFK_					0	0	0	0	P80210	P80210	P80210	ADE12	Adenylosuccinate synthetase	MULTI-MATCH			4	904.208	3612.8	62721.2	5.0524	0.0045684	0.57638	0.00052117	5.6288	0.0050896	904.71	906.713	105.34	0.11349	107.17	107.1	107.21	1.8327	0.00018883	0.00082683	NaN	105.75	47	12	6	NaN	NaN	NaN
doa10Δ(H)/WT(L) Rep1	YDFHMLPSGLVNPNCQNLLGNGVVIHVPSFFK	32	1	Oxidation (M)	_YDFHM(ox)LPSGLVNPNCQNLLGNGVVIHVPSFFK_					0	0	1	0	P80210	P80210	P80210	ADE12	Adenylosuccinate synthetase	MULTI-MATCH			4	908.206	3628.8	62977.4	5.2846	0.0047995	-0.43905	-0.00039875	4.8456	0.0044008	908.708	910.711	101.45	0.31385	103.48	103.34	103.65	2.0331	-0.20708	-9.77e-05	NaN	52.556	90	32	6	NaN	NaN	NaN
doa10Δ(H)/WT(L) Rep1	YDFHMLPSGLVNPNCQNLLGNGVVIHVPSFFK	32	1	Oxidation (M)	_YDFHM(ox)LPSGLVNPNCQNLLGNGVVIHVPSFFK_					0	0	1	0	P80210	P80210	P80210	ADE12	Adenylosuccinate synthetase	MULTI-MATCH			4	908.206	3628.8	63192.4	5.2529	0.0047707	-0.17776	-0.00016145	5.0751	0.0046092	908.457	910.712	100.7	0.41013	102.73	102.41	102.82	2.0331	-0.036122	0.0002601	NaN	90.757	202	45	12	NaN	NaN	NaN
doa10Δ(H)/WT(L) Rep1	YDFHMLPSGLVNPNCQNLLGNGVVIHVPSFFK	32	1	Oxidation (M)	_YDFHM(ox)LPSGLVNPNCQNLLGNGVVIHVPSFFK_					0	0	1	0	P80210	P80210	P80210	ADE12	Adenylosuccinate synthetase	MULTI-MATCH			4	908.206	3628.8	63833.3	5.275	0.0047908	-0.40912	-0.00037157	4.8659	0.0044192	908.707	910.711	101.9	0.19823	103.93	103.87	104.07	2.0331	0.93836	-0.00089674	NaN	51.104	59	20	6	NaN	NaN	NaN
doa10Δ(H)/WT(L) Rep1	YDFHMLPSGLVNPNCQNLLGNGVVIHVPSFFK	32	1	Oxidation (M)	_YDFHM(ox)LPSGLVNPNCQNLLGNGVVIHVPSFFK_					0	0	1	0	P80210	P80210	P80210	ADE12	Adenylosuccinate synthetase	MULTI-MATCH			4	908.206	3628.8	65008.5	5.2674	0.0047839	1.6255	0.0014763	6.893	0.0062602	908.459	910.463	102.27	0.24826	104.3	104.16	104.41	2.0331	0.85435	0.004647	NaN	86.141	49	25	4	NaN	NaN	NaN
doa10Δ(H)/WT(L) Rep1	YSTLINGYTSLNITK	15	1	Unmodified	_YSTLINGYTSLNITK_					0	0	0	0	P80210	P80210	P80210	ADE12	Adenylosuccinate synthetase	MULTI-MSMS		848.962	2	844.449	1686.88	66158	5.54	0.0046782	0.39191	0.00033095	5.9319	0.0050092	844.95	848.958	71.302	0.63548	73.435	73.205	73.841	2.1334					237	68	5	0	0	0
doa10Δ(H)/WT(L) Rep1	TLHPAVHAGILAR	13	0	Unmodified	_TLHPAVHAGILAR_					0	0	0	0	P54113	P54113	P54113	ADE16	Bifunctional purine biosynthesis protein ADE16;Phosphoribosylaminoimidazolecarboxamide formyltransferase;IMP cyclohydrolase	ISO-MSMS	-1	452.604	3	452.602	1354.78	NaN	NaN	NaN	0.50231	0.00022735	NaN	NaN	NaN	NaN	31.906	0.43392	33.839	33.515	33.949	1.9329								0	0	0
doa10Δ(H)/WT(L) Rep1	YTQSNSVCYAK	11	1	Unmodified	_YTQSNSVCYAK_					0	0	0	0	P54113	P54113	P54113	ADE16	Bifunctional purine biosynthesis protein ADE16;Phosphoribosylaminoimidazolecarboxamide formyltransferase;IMP cyclohydrolase	MULTI-MATCH			2	660.798	1319.58	74534.7	6.0596	0.0040042	0.26459	0.00017484	6.3242	0.004179	660.798	664.805	21.935	0.38123	23.667	23.461	23.842	1.7324	-0.056227	-0.00027602	NaN	45.433	117	37	5	NaN	NaN	NaN
doa10Δ(H)/WT(L) Rep1	TAILSVYDK	9	1	Unmodified	_TAILSVYDK_					0	0	0	0	P38009;P54113	P38009;P54113	P54113	ADE17;ADE16	Bifunctional purine biosynthesis protein ADE17;Phosphoribosylaminoimidazolecarboxamide formyltransferase;IMP cyclohydrolase;Bifunctional purine biosynthesis protein ADE16;Phosphoribosylaminoimidazolecarboxamide formyltransferase;IMP cyclohydrolase	MULTI-MSMS		505.285	2	505.282	1008.55	85725.6	4.8419	0.0024465	0.60337	0.00030487	5.4453	0.0027514	505.282	509.289	47.7	0.51863	49.734	49.523	50.041	2.0333					223	54	6	0	0	0
doa10Δ(H)/WT(L) Rep1	TVGILGGGQLGR	12	0	Unmodified	_TVGILGGGQLGR_					0	0	0	0	P21264	P21264	P21264	ADE2	Phosphoribosylaminoimidazole carboxylase	ISO-MSMS	-1	564.334	2	564.33	1126.65	NaN	NaN	NaN	0.21037	0.00011872	NaN	NaN	NaN	NaN	52.28	0.68027	54.413	54.185	54.865	2.1335								0	0	0
doa10Δ(H)/WT(L) Rep1	TVILDAENSPAK	12	1	Unmodified	_TVILDAENSPAK_					0	0	0	0	P21264	P21264	P21264	ADE2	Phosphoribosylaminoimidazole carboxylase	MULTI-MATCH			2	629.338	1256.66	77495.1	5.1824	0.0032615	0.60752	0.00038234	5.79	0.0036438	629.339	633.345	38.106	0.22784	40.039	39.906	40.134	1.933	0.35353	0.00090062	NaN	66.267	61	23	5	NaN	NaN	NaN
doa10Δ(H)/WT(L) Rep1	LINQLAQELGIYSHELELYGHYK	23	1	Unmodified	_LINQLAQELGIYSHELELYGHYK_					0	0	0	0	P07245	P07245	P07245	ADE3	C-1-tetrahydrofolate synthase, cytoplasmic;Methylenetetrahydrofolate dehydrogenase;Methenyltetrahydrofolate cyclohydrolase;Formyltetrahydrofolate synthetase	MULTI-MSMS		685.867	4	683.608	2730.4	72129.5	5.3494	0.0036569	-0.18699	-0.00012783	5.1624	0.003529	683.858	686.112	98.383	0.43733	100.52	100.21	100.65	2.1334					207	45	8	0	0	0
doa10Δ(H)/WT(L) Rep1	LINQLAQELGIYSHELELYGHYK	23	1	Unmodified	_LINQLAQELGIYSHELELYGHYK_					0	0	0	0	P07245	P07245	P07245	ADE3	C-1-tetrahydrofolate synthase, cytoplasmic;Methylenetetrahydrofolate dehydrogenase;Methenyltetrahydrofolate cyclohydrolase;Formyltetrahydrofolate synthetase	MULTI-MSMS		686.116	4	683.608	2730.4	72153.7	5.4032	0.0036937	0.38227	0.00026132	5.7854	0.003955	684.109	685.862	98.655	0.18684	100.79	100.66	100.85	2.1334					64	19	8	0	0	0
doa10Δ(H)/WT(L) Rep1	LLTPVPSDIDISR	13	0	Unmodified	_LLTPVPSDIDISR_					0	0	0	0	P07245	P07245	P07245	ADE3	C-1-tetrahydrofolate synthase, cytoplasmic;Methylenetetrahydrofolate dehydrogenase;Methenyltetrahydrofolate cyclohydrolase;Formyltetrahydrofolate synthetase	ISO-MSMS	-1	713.405	2	713.401	1424.79	NaN	NaN	NaN	0.60326	0.00043037	NaN	NaN	NaN	NaN	68.323	0.43687	70.456	70.253	70.69	2.1334								0	0	0
doa10Δ(H)/WT(L) Rep1	SLNSTVTITHSK	12	1	Unmodified	_SLNSTVTITHSK_					0	0	0	0	P07245	P07245	P07245	ADE3	C-1-tetrahydrofolate synthase, cytoplasmic;Methylenetetrahydrofolate dehydrogenase;Methenyltetrahydrofolate cyclohydrolase;Formyltetrahydrofolate synthetase	MULTI-MSMS		432.574	3	429.902	1286.68	91542.1	5.1192	0.0022008	0.80874	0.00034768	5.928	0.0025484	429.902	432.573	24.124	0.83705	25.956	25.603	26.44	1.8327					316	84	6	0	0	0
doa10Δ(H)/WT(L) Rep1	SLNSTVTITHSK	12	1	Unmodified	_SLNSTVTITHSK_					0	0	0	0	P07245	P07245	P07245	ADE3	C-1-tetrahydrofolate synthase, cytoplasmic;Methylenetetrahydrofolate dehydrogenase;Methenyltetrahydrofolate cyclohydrolase;Formyltetrahydrofolate synthetase	MULTI-MATCH			2	644.349	1286.68	82745.8	5.6774	0.0036582	0.037986	2.45e-05	5.7154	0.0036827	644.349	648.356	24.188	0.27762	26.021	25.931	26.208	1.8327	0.5979	-0.00011374	NaN	39.581	61	27	4	NaN	NaN	NaN
doa10Δ(H)/WT(L) Rep1	SSGLTPNAVVLVATVR	16	0	Unmodified	_SSGLTPNAVVLVATVR_					0	0	0	0	P07245	P07245	P07245	ADE3	C-1-tetrahydrofolate synthase, cytoplasmic;Methylenetetrahydrofolate dehydrogenase;Methenyltetrahydrofolate cyclohydrolase;Formyltetrahydrofolate synthetase	ISO-MSMS	-1	792.465	2	792.459	1582.9	NaN	NaN	NaN	-0.28613	-0.00022674	NaN	NaN	NaN	NaN	74.484	0.80982	76.718	76.421	77.231	2.2335								0	0	0
doa10Δ(H)/WT(L) Rep1	STTTMGLVQALTAHLGKPAIANVR	24	1	Unmodified	_STTTMGLVQALTAHLGKPAIANVR_					0	0	0	1	P07245	P07245	P07245	ADE3	C-1-tetrahydrofolate synthase, cytoplasmic;Methylenetetrahydrofolate dehydrogenase;Methenyltetrahydrofolate cyclohydrolase;Formyltetrahydrofolate synthetase	MULTI-MSMS		613.599	4	613.344	2449.35	76012	5.1875	0.0031817	-0.22541	-0.00013825	4.9621	0.0030434	613.595	615.598	86.869	0.27977	89.102	88.998	89.278	2.2335					192	30	8	0	0	0
doa10Δ(H)/WT(L) Rep1	STTTMGLVQALTAHLGKPAIANVR	24	1	Unmodified	_STTTMGLVQALTAHLGKPAIANVR_					0	0	0	1	P07245	P07245	P07245	ADE3	C-1-tetrahydrofolate synthase, cytoplasmic;Methylenetetrahydrofolate dehydrogenase;Methenyltetrahydrofolate cyclohydrolase;Formyltetrahydrofolate synthetase	MULTI-MSMS		613.347	4	613.344	2449.35	75838.9	5.1986	0.0031885	-0.094536	-5.8e-05	5.104	0.0031305	613.595	615.598	87.138	0.20512	89.372	89.259	89.464	2.2335					151	21	9	0	0	0
doa10Δ(H)/WT(L) Rep1	STTTMGLVQALTAHLGKPAIANVR	24	1	Unmodified	_STTTMGLVQALTAHLGKPAIANVR_					0	0	0	1	P07245	P07245	P07245	ADE3	C-1-tetrahydrofolate synthase, cytoplasmic;Methylenetetrahydrofolate dehydrogenase;Methenyltetrahydrofolate cyclohydrolase;Formyltetrahydrofolate synthetase	MULTI-MSMS		615.602	4	613.344	2449.35	76012	5.2124	0.003197	0.13118	8.05e-05	5.3435	0.0032774	613.595	615.348	87.282	0.21503	89.516	89.455	89.67	2.2335					97	22	10	0	0	0
doa10Δ(H)/WT(L) Rep1	TNPDDLTPEEINK	13	1	Unmodified	_TNPDDLTPEEINK_					0	0	0	0	P07245	P07245	P07245	ADE3	C-1-tetrahydrofolate synthase, cytoplasmic;Methylenetetrahydrofolate dehydrogenase;Methenyltetrahydrofolate cyclohydrolase;Formyltetrahydrofolate synthetase	MULTI-MSMS		747.87	2	743.357	1484.7	72113.6	6.0463	0.0044946	0.56553	0.00042039	6.6118	0.004915	743.357	747.364	42.624	0.32016	44.658	44.493	44.814	2.0333					128	32	5	0	0	0
doa10Δ(H)/WT(L) Rep1	TQYSLSHDATLK	12	1	Unmodified	_TQYSLSHDATLK_					0	0	0	0	P07245	P07245	P07245	ADE3	C-1-tetrahydrofolate synthase, cytoplasmic;Methylenetetrahydrofolate dehydrogenase;Methenyltetrahydrofolate cyclohydrolase;Formyltetrahydrofolate synthetase	ISO-MSMS	0	455.235	3	455.233	1362.68	NaN	NaN	NaN	0.19339	8.8e-05	NaN	NaN	NaN	NaN	32.059	0.63976	33.992	33.645	34.285	1.9329								0	0	0
doa10Δ(H)/WT(L) Rep1	TQYSLSHDATLK	12	1	Unmodified	_TQYSLSHDATLK_					0	0	0	0	P07245	P07245	P07245	ADE3	C-1-tetrahydrofolate synthase, cytoplasmic;Methylenetetrahydrofolate dehydrogenase;Methenyltetrahydrofolate cyclohydrolase;Formyltetrahydrofolate synthetase	MULTI-MATCH			2	682.346	1362.68	76546.7	5.3052	0.00362	1.4411	0.00098336	6.7464	0.0046034	682.347	686.856	31.966	0.23349	33.899	33.739	33.972	1.9329	0.029093	-0.00087772	NaN	44.511	61	25	5	NaN	NaN	NaN
doa10Δ(H)/WT(L) Rep1	TQYSLSHDATLK	12	1	Unmodified	_TQYSLSHDATLK_					0	0	0	0	P07245	P07245	P07245	ADE3	C-1-tetrahydrofolate synthase, cytoplasmic;Methylenetetrahydrofolate dehydrogenase;Methenyltetrahydrofolate cyclohydrolase;Formyltetrahydrofolate synthetase	MULTI-MATCH			3	455.233	1362.68	89147.6	5.083	0.0023139	2.4956	0.0011361	7.5786	0.00345	455.234	457.906	31.699	0.061251	33.632	33.584	33.645	1.9329	-0.33618	0.0025651	NaN	69.864	11	5	4	NaN	NaN	NaN
doa10Δ(H)/WT(L) Rep1	VALKLVGTEPEAK	13	2	GlyGly (K)	_VALK(gl)LVGTEPEAK_					0	1	0	1	P07245	P07245	P07245	ADE3	C-1-tetrahydrofolate synthase, cytoplasmic;Methylenetetrahydrofolate dehydrogenase;Methenyltetrahydrofolate cyclohydrolase;Formyltetrahydrofolate synthetase	MULTI-MATCH			3	490.284	1467.83	85908.6	5.6247	0.0027577	0.37498	0.00018385	5.9996	0.0029415	490.618	495.627	42.526	0.7632	44.56	44.228	44.992	2.0333	0.56366	0.00034673	NaN	52.463	290	78	7	NaN	NaN	NaN
doa10Δ(H)/WT(L) Rep1	YILVSGITPTPLGEGK	16	1	Unmodified	_YILVSGITPTPLGEGK_					0	0	0	0	P07245	P07245	P07245	ADE3	C-1-tetrahydrofolate synthase, cytoplasmic;Methylenetetrahydrofolate dehydrogenase;Methenyltetrahydrofolate cyclohydrolase;Formyltetrahydrofolate synthetase	MULTI-MSMS		822.968	2	822.964	1643.91	70931.1	6.1868	0.0050915	-0.71781	-0.00059073	5.4689	0.0045007	823.466	827.472	74.571	0.39871	76.805	76.683	77.082	2.2335					92	41	4	0	0	0
doa10Δ(H)/WT(L) Rep1	YVHLITPVPGGVGPMTVAMLMQNTLIAAK	29	1	Unmodified	_YVHLITPVPGGVGPMTVAMLMQNTLIAAK_					0	0	0	0	P07245	P07245	P07245	ADE3	C-1-tetrahydrofolate synthase, cytoplasmic;Methylenetetrahydrofolate dehydrogenase;Methenyltetrahydrofolate cyclohydrolase;Formyltetrahydrofolate synthetase	MULTI-MATCH			3	1008.21	3021.62	60448.7	3.4255	0.0034537	-0.81359	-0.00082027	2.6119	0.0026334	1008.88	1011.89	111.94	0.18221	112.46	112.38	112.56	0.5295	0.18818	-0.0010624	NaN	148.72	23	5	8	NaN	NaN	NaN
doa10Δ(H)/WT(L) Rep1	AFQNSESSK	9	1	Unmodified	_AFQNSESSK_					0	0	0	0	P07244	P07244	P07244	ADE5,7	Bifunctional purine biosynthetic protein ADE5,7;Phosphoribosylamine--glycine ligase;Phosphoribosylformylglycinamidine cyclo-ligase	MULTI-MSMS		503.242	2	499.233	996.451	83514.1	5.2131	0.0026026	-0.38424	-0.00019183	4.8289	0.0024107	499.233	503.239	9.7239	0.2325	10.554	10.425	10.658	0.83037					83	24	5	0	0	0
doa10Δ(H)/WT(L) Rep1	LLLGLAHITGGGLVENIPR	19	0	Unmodified	_LLLGLAHITGGGLVENIPR_					0	0	0	0	P07244	P07244	P07244	ADE5,7	Bifunctional purine biosynthetic protein ADE5,7;Phosphoribosylamine--glycine ligase;Phosphoribosylformylglycinamidine cyclo-ligase	ISO-MSMS	-1	648.726	3	648.386	1942.14	NaN	NaN	NaN	0.16645	0.00010792	NaN	NaN	NaN	NaN	84.084	1.1466	86.318	85.81	86.956	2.2335								0	0	0
doa10Δ(H)/WT(L) Rep1	MLNILVLGNGAR	12	0	Unmodified	_MLNILVLGNGAR_					0	0	0	0	P07244	P07244	P07244	ADE5,7	Bifunctional purine biosynthetic protein ADE5,7;Phosphoribosylamine--glycine ligase;Phosphoribosylformylglycinamidine cyclo-ligase	ISO-MSMS	-1	635.872	2	635.869	1269.72	NaN	NaN	NaN	-0.26064	-0.00016573	NaN	NaN	NaN	NaN	78.661	0.70398	80.894	80.556	81.26	2.2335								0	0	0
doa10Δ(H)/WT(L) Rep1	TAVDTVYEAVK	11	1	Unmodified	_TAVDTVYEAVK_					0	0	0	0	P07244	P07244	P07244	ADE5,7	Bifunctional purine biosynthetic protein ADE5,7;Phosphoribosylamine--glycine ligase;Phosphoribosylformylglycinamidine cyclo-ligase	MULTI-MSMS		602.324	2	598.314	1194.61	78580.1	5.6634	0.0033885	-0.49828	-0.00029813	5.1651	0.0030903	598.314	602.321	52.104	0.41166	54.237	53.973	54.385	2.1335					111	42	4	0	0	0
doa10Δ(H)/WT(L) Rep1	FPFNPNGSTNGIAGIKSPNGR	21	1	GlyGly (K)	_FPFNPNGSTNGIAGIK(gl)SPNGR_	FPFNPNGSTNGIAGIK(1)SPNGR		FPFNPNGSTNGIAGIK(60.56)SPNGR		0	1	0	1	P38972	P38972	P38972	ADE6	Phosphoribosylformylglycinamidine synthase	MULTI-MSMS		756.391	3	753.714	2258.12	70601.9	5.4677	0.0041211	0.21685	0.00016344	5.6846	0.0042846	754.048	756.72	60.572	0.80452	62.705	62.151	62.956	2.1335					279	83	8	0	0	0
doa10Δ(H)/WT(L) Rep1	GFHKPIMIAGGFGTVRPQFALK	22	2	Unmodified	_GFHKPIMIAGGFGTVRPQFALK_					0	0	0	2	P38972	P38972	P38972	ADE6	Phosphoribosylformylglycinamidine synthase	MULTI-MSMS		594.087	4	593.832	2371.3	75864.4	5.4896	0.0032599	0.1545	9.17e-05	5.6441	0.0033516	594.083	598.09	65.258	0.46468	67.392	67.072	67.536	2.1334					439	42	12	0	0	0
doa10Δ(H)/WT(L) Rep1	GFHKPIMIAGGFGTVRPQFALK	22	2	Unmodified	_GFHKPIMIAGGFGTVRPQFALK_					0	0	0	2	P38972	P38972	P38972	ADE6	Phosphoribosylformylglycinamidine synthase	MULTI-MSMS		479.076	5	475.267	2371.3	84571.4	5.4166	0.0025743	0.2868	0.00013631	5.7034	0.0027106	475.468	478.673	65.326	0.37399	67.459	67.162	67.536	2.1334					307	39	9	0	0	0
doa10Δ(H)/WT(L) Rep1	GFHKPIMIAGGFGTVRPQFALK	22	2	Unmodified	_GFHKPIMIAGGFGTVRPQFALK_					0	0	0	2	P38972	P38972	P38972	ADE6	Phosphoribosylformylglycinamidine synthase	MULTI-MSMS		594.086	4	593.832	2371.3	78230.6	5.2245	0.0031025	-1.3757	-0.00081696	3.8488	0.0022855	594.082	598.089	65.794	0.15135	67.927	67.831	67.982	2.1334					56	18	7	0	0	0
doa10Δ(H)/WT(L) Rep1	GFHKPIMIAGGFGTVRPQFALK	22	2	Unmodified	_GFHKPIMIAGGFGTVRPQFALK_					0	0	0	2	P38972	P38972	P38972	ADE6	Phosphoribosylformylglycinamidine synthase	MULTI-MSMS		594.585	4	593.832	2371.3	76320.7	5.1648	0.003067	-1.5909	-0.00094473	3.5739	0.0021223	594.082	598.089	65.909	0.14271	68.042	67.998	68.14	2.1334					75	17	8	0	0	0
doa10Δ(H)/WT(L) Rep1	GFHKPIMIAGGFGTVRPQFALK	22	2	Unmodified	_GFHKPIMIAGGFGTVRPQFALK_					0	0	0	2	P38972	P38972	P38972	ADE6	Phosphoribosylformylglycinamidine synthase	MULTI-MSMS		598.092	4	593.832	2371.3	76320.8	5.1228	0.0030421	-0.15689	-9.32e-05	4.9659	0.0029489	594.082	597.838	66.054	0.32894	68.187	68.044	68.373	2.1334					126	39	7	0	0	0
doa10Δ(H)/WT(L) Rep1	GFHKPIMIAGGFGTVRPQFALK	22	2	Unmodified	_GFHKPIMIAGGFGTVRPQFALK_					0	0	0	2	P38972	P38972	P38972	ADE6	Phosphoribosylformylglycinamidine synthase	MULTI-MATCH			4	593.832	2371.3	78519.7	5.471	0.0032489	-1.2948	-0.00076891	4.1762	0.00248	594.082	598.339	67.231	0.35148	69.365	69.242	69.593	2.1334	0.076419	-0.0012544	NaN	62.556	108	36	6	NaN	NaN	NaN
doa10Δ(H)/WT(L) Rep1	GFHKPIMIAGGFGTVRPQFALK	22	2	Unmodified	_GFHKPIMIAGGFGTVRPQFALK_					0	0	0	2	P38972	P38972	P38972	ADE6	Phosphoribosylformylglycinamidine synthase	MULTI-MATCH			4	593.832	2371.3	76269.6	5.3239	0.0031615	-0.85786	-0.00050943	4.466	0.0026521	594.082	598.09	65.592	0.055969	67.725	67.685	67.741	2.1334	0.53007	-0.0017068	NaN	89.468	21	6	6	NaN	NaN	NaN
doa10Δ(H)/WT(L) Rep1	GFHKPIMIAGGFGTVRPQFALK	22	2	Unmodified	_GFHKPIMIAGGFGTVRPQFALK_					0	0	0	2	P38972	P38972	P38972	ADE6	Phosphoribosylformylglycinamidine synthase	MULTI-MATCH			5	475.267	2371.3	86398.6	5.2918	0.002515	0.32608	0.00015498	5.6179	0.00267	475.468	478.473	66.495	0.26834	68.629	68.535	68.803	2.1334	0.32131	0.00084641	NaN	47.726	80	28	5	NaN	NaN	NaN
doa10Δ(H)/WT(L) Rep1	GFHKPIMIAGGFGTVRPQFALK	22	2	Unmodified	_GFHKPIMIAGGFGTVRPQFALK_					0	0	0	2	P38972	P38972	P38972	ADE6	Phosphoribosylformylglycinamidine synthase	MULTI-MATCH			5	475.267	2371.3	85873.1	5.1945	0.0024688	0.15682	7.45e-05	5.3513	0.0025433	475.267	478.473	66.342	0.41251	68.475	68.287	68.7	2.1334	0.045059	-0.00019696	NaN	50.493	107	45	6	NaN	NaN	NaN
doa10Δ(H)/WT(L) Rep1	GFHKPIMIAGGFGTVRPQFALK	22	2	Oxidation (M)	_GFHKPIM(ox)IAGGFGTVRPQFALK_					0	0	1	2	P38972	P38972	P38972	ADE6	Phosphoribosylformylglycinamidine synthase	MULTI-MATCH			4	597.831	2387.29	74312.8	5.7314	0.0034264	-0.22932	-0.00013709	5.502	0.0032893	598.082	602.089	62.247	0.38149	64.381	64.269	64.65	2.1335	0.61665	-0.0011897	NaN	51.786	97	36	7	NaN	NaN	NaN
doa10Δ(H)/WT(L) Rep1	SLGASALLQVYNQVGNK	17	1	Unmodified	_SLGASALLQVYNQVGNK_					0	0	0	0	P38972	P38972	P38972	ADE6	Phosphoribosylformylglycinamidine synthase	MULTI-MSMS		881.984	2	881.478	1760.94	68320.6	5.749	0.0050676	0.023015	2.03e-05	5.772	0.0050879	881.479	885.486	80.828	0.23282	83.061	82.893	83.126	2.2335					78	23	7	0	0	0
doa10Δ(H)/WT(L) Rep1	SLGASALLQVYNQVGNK	17	1	Unmodified	_SLGASALLQVYNQVGNK_					0	0	0	0	P38972	P38972	P38972	ADE6	Phosphoribosylformylglycinamidine synthase	MULTI-MSMS		885.49	2	881.478	1760.94	65795.5	5.6323	0.0049648	-0.34446	-0.00030364	5.2879	0.0046611	881.479	885.986	80.95	0.28851	83.184	83.1	83.388	2.2335					82	31	5	0	0	0
doa10Δ(H)/WT(L) Rep1	TWTPLLNR	8	0	Unmodified	_TWTPLLNR_					0	0	0	0	P38972	P38972	P38972	ADE6	Phosphoribosylformylglycinamidine synthase	ISO-MSMS	-1	500.785	2	500.782	999.55	NaN	NaN	NaN	0.055112	2.76e-05	NaN	NaN	NaN	NaN	58.847	0.92633	60.88	60.479	61.405	2.0333								0	0	0
doa10Δ(H)/WT(L) Rep1	ALKSANLMAGHWVAISGAAGGLGSLAVQYAK	31	2	Unmodified	_ALKSANLMAGHWVAISGAAGGLGSLAVQYAK_					0	0	0	1	P00330	P00330	P00330	ADH1	Alcohol dehydrogenase 1	MULTI-MSMS		758.17	4	753.908	3011.6	68814.4	5.3537	0.0040362	0.097155	7.32e-05	5.4508	0.0041094	754.159	758.166	85.71	0.40051	87.944	87.763	88.163	2.2335					197	43	9	0	0	0
doa10Δ(H)/WT(L) Rep1	ALKSANLMAGHWVAISGAAGGLGSLAVQYAK	31	2	Unmodified	_ALKSANLMAGHWVAISGAAGGLGSLAVQYAK_					0	0	0	1	P00330	P00330	P00330	ADH1	Alcohol dehydrogenase 1	MULTI-MSMS		758.17	4	753.908	3011.6	69519.9	5.3648	0.0040445	0.077989	5.88e-05	5.4428	0.0041033	754.409	758.165	86.144	0.29989	88.378	88.154	88.454	2.2335					106	30	6	0	0	0
doa10Δ(H)/WT(L) Rep1	ALKSANLMAGHWVAISGAAGGLGSLAVQYAK	31	2	Unmodified	_ALKSANLMAGHWVAISGAAGGLGSLAVQYAK_					0	0	0	1	P00330	P00330	P00330	ADH1	Alcohol dehydrogenase 1	MULTI-MATCH			4	753.908	3011.6	69914.3	5.4151	0.0040825	0.22173	0.00016716	5.6368	0.0042496	754.159	757.915	87.303	0.09304	89.536	89.473	89.566	2.2335	0.36022	0.00010411	NaN	32.612	30	9	4	NaN	NaN	NaN
doa10Δ(H)/WT(L) Rep1	ANELLINVK	9	1	Unmodified	_ANELLINVK_					0	0	0	0	P00330	P00330	P00330	ADH1	Alcohol dehydrogenase 1	MULTI-MSMS		507.306	2	507.303	1012.59	85502.2	5.1836	0.0026296	-0.047808	-2.43e-05	5.1358	0.0026054	507.303	511.31	51.252	1.1283	53.386	52.618	53.746	2.1335					482	118	6	0	0	0
doa10Δ(H)/WT(L) Rep1	ATDGGAHGVINVSVSEAAIEASTR	24	0	Unmodified	_ATDGGAHGVINVSVSEAAIEASTR_					0	0	0	0	P00330	P00330	P00330	ADH1	Alcohol dehydrogenase 1	ISO-MSMS	-1	771.724	3	771.387	2311.14	NaN	NaN	NaN	-1.8412	-0.0014202	NaN	NaN	NaN	NaN	65.79	0.11139	67.923	67.839	67.95	2.1334								0	0	0
doa10Δ(H)/WT(L) Rep1	ATDGGAHGVINVSVSEAAIEASTR	24	0	Unmodified	_ATDGGAHGVINVSVSEAAIEASTR_					0	0	0	0	P00330	P00330	P00330	ADH1	Alcohol dehydrogenase 1	ISO-MSMS	-1	771.39	3	771.387	2311.14	NaN	NaN	NaN	0.17337	0.00013374	NaN	NaN	NaN	NaN	66.344	0.37533	68.478	68.39	68.766	2.1334								0	0	0
doa10Δ(H)/WT(L) Rep1	ATDGGAHGVINVSVSEAAIEASTR	24	0	Unmodified	_ATDGGAHGVINVSVSEAAIEASTR_					0	0	0	0	P00330	P00330	P00330	ADH1	Alcohol dehydrogenase 1	ISO-MSMS	-1	771.39	3	771.387	2311.14	NaN	NaN	NaN	0.12368	9.54e-05	NaN	NaN	NaN	NaN	67.505	0.29646	69.639	69.469	69.766	2.1334								0	0	0
doa10Δ(H)/WT(L) Rep1	ATDGGAHGVINVSVSEAAIEASTR	24	0	Unmodified	_ATDGGAHGVINVSVSEAAIEASTR_					0	0	0	0	P00330	P00330	P00330	ADH1	Alcohol dehydrogenase 1	ISO-MSMS	-1	771.727	3	771.387	2311.14	NaN	NaN	NaN	-0.33983	-0.00026214	NaN	NaN	NaN	NaN	67.776	0.23503	69.909	69.747	69.982	2.1334								0	0	0
doa10Δ(H)/WT(L) Rep1	CCSDVFNQVVK	11	1	Unmodified	_CCSDVFNQVVK_					0	0	0	0	P00330	P00330	P00330	ADH1	Alcohol dehydrogenase 1	MULTI-MSMS		678.312	2	678.308	1354.6	71634.1	5.5878	0.0037902	-0.34635	-0.00023493	5.2414	0.0035553	678.308	682.315	50.895	0.75647	53.029	52.544	53.301	2.1335					568	76	10	0	0	0
doa10Δ(H)/WT(L) Rep1	CCSDVFNQVVK	11	1	Unmodified	_CCSDVFNQVVK_					0	0	0	0	P00330	P00330	P00330	ADH1	Alcohol dehydrogenase 1	MULTI-MATCH			2	678.308	1354.6	73254.4	5.5856	0.0037887	0.50204	0.00034054	6.0876	0.0041293	678.308	682.315	51.187	0.10683	53.321	53.301	53.408	2.1335	0.321	0.0010292	NaN	174.77	31	11	6	NaN	NaN	NaN
doa10Δ(H)/WT(L) Rep1	CCSDVFNQVVKSISIVGSYVGNR	23	1	Unmodified	_CCSDVFNQVVKSISIVGSYVGNR_					0	0	0	1	P00330	P00330	P00330	ADH1	Alcohol dehydrogenase 1	MULTI-MATCH			3	863.425	2587.25	65647.6	5.116	0.0044173	-0.35737	-0.00030857	4.7586	0.0041087	863.759	866.43	109.66	0.3718	111.2	111.11	111.48	1.5319	-0.10306	-0.0002903	NaN	30.311	179	39	8	NaN	NaN	NaN
doa10Δ(H)/WT(L) Rep1	CCSDVFNQVVKSISIVGSYVGNR	23	1	Unmodified	_CCSDVFNQVVKSISIVGSYVGNR_					0	0	0	1	P00330	P00330	P00330	ADH1	Alcohol dehydrogenase 1	MULTI-MATCH			3	863.425	2587.25	65774.3	5.1356	0.0044342	0.18843	0.00016269	5.3241	0.0045969	863.76	866.431	109.53	0.44787	111.16	110.82	111.27	1.6322	-0.24289	0.00044566	NaN	41.911	233	46	8	NaN	NaN	NaN
doa10Δ(H)/WT(L) Rep1	CCSDVFNQVVKSISIVGSYVGNR	23	1	GlyGly (K)	_CCSDVFNQVVK(gl)SISIVGSYVGNR_					0	1	0	1	P00330	P00330	P00330	ADH1	Alcohol dehydrogenase 1	MULTI-MATCH			3	901.439	2701.3	65170.3	5.0516	0.0045537	0.14312	0.00012902	5.1947	0.0046827	901.774	904.445	109.81	0.39658	111.35	111.11	111.51	1.5319	-0.063972	0.00013453	NaN	51.232	200	42	9	NaN	NaN	NaN
doa10Δ(H)/WT(L) Rep1	CCSDVFNQVVKSISIVGSYVGNR	23	1	GlyGly (K)	_CCSDVFNQVVK(gl)SISIVGSYVGNR_					0	1	0	1	P00330	P00330	P00330	ADH1	Alcohol dehydrogenase 1	MULTI-MATCH			3	901.439	2701.3	65175.1	4.9148	0.0044304	0.48538	0.00043754	5.4002	0.0048679	901.775	904.445	110.32	0.21112	111.85	111.71	111.92	1.5319	0.10807	-0.00072115	NaN	61.963	59	24	4	NaN	NaN	NaN
doa10Δ(H)/WT(L) Rep1	CCSDVFNQVVKSISIVGSYVGNRADTR	27	1	Unmodified	_CCSDVFNQVVKSISIVGSYVGNRADTR_					0	0	0	2	P00330	P00330	P00330	ADH1	Alcohol dehydrogenase 1	MULTI-MATCH			4	758.624	3030.47	72641.6	5.1871	0.0039351	-0.15523	-0.00011776	5.0319	0.0038173	758.875	761.128	105.93	0.080345	107.76	107.71	107.79	1.8326	-0.10632	0.0013403	NaN	38.688	34	8	6	NaN	NaN	NaN
doa10Δ(H)/WT(L) Rep1	DIVGAVLK	8	1	Unmodified	_DIVGAVLK_					0	0	0	0	P00330	P00330	P00330	ADH1	Alcohol dehydrogenase 1	MULTI-MATCH			2	407.755	813.496	95136.9	5.1966	0.002119	0.46027	0.00018768	5.6569	0.0023066	407.755	411.762	56.87	0.63524	58.904	58.66	59.296	2.0333	0.39983	-0.00012693	NaN	58.782	224	65	5	NaN	NaN	NaN
doa10Δ(H)/WT(L) Rep1	GVIFYESHGK	10	1	Unmodified	_GVIFYESHGK_					0	0	0	0	P00330	P00330	P00330	ADH1	Alcohol dehydrogenase 1	MULTI-MSMS		572.801	2	568.79	1135.57	78874.8	5.2473	0.0029846	0.37958	0.0002159	5.6269	0.0032005	568.79	572.798	33.645	1.0067	35.678	35.102	36.109	2.0331					477	105	7	0	0	0
doa10Δ(H)/WT(L) Rep1	GVIFYESHGKLEYK	14	2	Unmodified	_GVIFYESHGKLEYK_					0	0	0	1	P00330	P00330	P00330	ADH1	Alcohol dehydrogenase 1	MULTI-MSMS		422.23	4	418.22	1668.85	92202.4	5.2236	0.0021846	0.28602	0.00011962	5.5097	0.0023043	418.471	422.227	46.521	0.76574	48.554	48.096	48.862	2.0333					328	81	7	0	0	0
doa10Δ(H)/WT(L) Rep1	GVIFYESHGKLEYK	14	2	Unmodified	_GVIFYESHGKLEYK_					0	0	0	1	P00330	P00330	P00330	ADH1	Alcohol dehydrogenase 1	MULTI-MSMS		562.637	3	557.291	1668.85	78968.9	5.27	0.0029369	0.017312	9.65e-06	5.2873	0.0029466	557.291	562.634	46.563	0.89713	48.596	48.223	49.12	2.0333					305	94	7	0	0	0
doa10Δ(H)/WT(L) Rep1	GVIFYESHGKLEYK	14	2	Unmodified	_GVIFYESHGKLEYK_					0	0	0	1	P00330	P00330	P00330	ADH1	Alcohol dehydrogenase 1	MULTI-MSMS		557.628	3	557.291	1668.85	78978.5	5.2224	0.0029104	-0.28126	-0.00015675	4.9412	0.0027537	557.291	562.968	46.434	0.43858	48.468	48.123	48.562	2.0333					154	46	6	0	0	0
doa10Δ(H)/WT(L) Rep1	GVIFYESHGKLEYK	14	2	Unmodified	_GVIFYESHGKLEYK_					0	0	0	1	P00330	P00330	P00330	ADH1	Alcohol dehydrogenase 1	ISO-MSMS	1	562.637	3	557.291	1668.85	NaN	NaN	NaN	-0.87211	-0.00048602	NaN	NaN	NaN	NaN	47.323	0.27071	49.357	49.244	49.515	2.0333								0	0	0
doa10Δ(H)/WT(L) Rep1	GVIFYESHGKLEYK	14	2	Unmodified	_GVIFYESHGKLEYK_					0	0	0	1	P00330	P00330	P00330	ADH1	Alcohol dehydrogenase 1	MULTI-MATCH			3	557.291	1668.85	78932.7	5.3035	0.0029556	0.84497	0.00047089	6.1485	0.0034265	557.292	562.969	47.588	0.30067	49.621	49.523	49.823	2.0333	0.29032	0.0012241	NaN	60.301	92	32	4	NaN	NaN	NaN
doa10Δ(H)/WT(L) Rep1	GVIFYESHGKLEYK	14	2	Unmodified	_GVIFYESHGKLEYK_					0	0	0	1	P00330	P00330	P00330	ADH1	Alcohol dehydrogenase 1	MULTI-MATCH			4	418.22	1668.85	92615.7	5.1945	0.0021724	0.30628	0.00012809	5.5007	0.0023005	418.22	422.478	47.559	0.51863	49.593	49.523	50.041	2.0333	0.13296	0.00019972	NaN	71.513	205	54	6	NaN	NaN	NaN
doa10Δ(H)/WT(L) Rep1	SANLMAGHWVAISGAAGGLGSLAVQYAK	28	1	Oxidation (M)	_SANLM(ox)AGHWVAISGAAGGLGSLAVQYAK_		SANLM(1)AGHWVAISGAAGGLGSLAVQYAK		SANLM(110.12)AGHWVAISGAAGGLGSLAVQYAK	0	0	1	0	P00330	P00330	P00330	ADH1	Alcohol dehydrogenase 1	MULTI-MSMS		909.146	3	906.134	2715.38	62150	5.5761	0.0050527	0.079536	7.21e-05	5.6556	0.0051247	906.469	909.14	84.593	1.7435	86.826	85.879	87.622	2.2335					1313	181	12	0	0	0
doa10Δ(H)/WT(L) Rep1	SANLMAGHWVAISGAAGGLGSLAVQYAK	28	1	Oxidation (M)	_SANLM(ox)AGHWVAISGAAGGLGSLAVQYAK_		SANLM(1)AGHWVAISGAAGGLGSLAVQYAK		SANLM(69.73)AGHWVAISGAAGGLGSLAVQYAK	0	0	1	0	P00330	P00330	P00330	ADH1	Alcohol dehydrogenase 1	MULTI-MSMS		909.479	3	906.134	2715.38	62260.6	5.3262	0.0048263	-0.18971	-0.0001719	5.1365	0.0046544	906.468	909.14	85.704	0.38306	87.938	87.789	88.172	2.2335					257	41	9	0	0	0
doa10Δ(H)/WT(L) Rep1	SANLMAGHWVAISGAAGGLGSLAVQYAK	28	1	Oxidation (M)	_SANLM(ox)AGHWVAISGAAGGLGSLAVQYAK_		SANLM(1)AGHWVAISGAAGGLGSLAVQYAK		SANLM(81.76)AGHWVAISGAAGGLGSLAVQYAK	0	0	1	0	P00330	P00330	P00330	ADH1	Alcohol dehydrogenase 1	MULTI-MSMS		906.474	3	906.134	2715.38	62260.6	5.5049	0.0049881	0.57437	0.00052045	6.0792	0.0055086	906.469	909.14	87.916	0.44767	90.049	89.839	90.287	2.1332					273	47	9	0	0	0
doa10Δ(H)/WT(L) Rep1	SANLMAGHWVAISGAAGGLGSLAVQYAK	28	1	Oxidation (M)	_SANLM(ox)AGHWVAISGAAGGLGSLAVQYAK_		SANLM(1)AGHWVAISGAAGGLGSLAVQYAK		SANLM(53.2)AGHWVAISGAAGGLGSLAVQYAK	0	0	1	0	P00330	P00330	P00330	ADH1	Alcohol dehydrogenase 1	MULTI-MSMS		909.146	3	906.134	2715.38	62177.2	5.5662	0.0050437	-0.030713	-2.78e-05	5.5355	0.0050159	906.468	909.14	88.177	0.53536	90.31	90.149	90.685	2.1332					241	58	6	0	0	0
doa10Δ(H)/WT(L) Rep1	SANLMAGHWVAISGAAGGLGSLAVQYAK	28	1	Oxidation (M)	_SANLM(ox)AGHWVAISGAAGGLGSLAVQYAK_		SANLM(1)AGHWVAISGAAGGLGSLAVQYAK		SANLM(43.44)AGHWVAISGAAGGLGSLAVQYAK	0	0	1	0	P00330	P00330	P00330	ADH1	Alcohol dehydrogenase 1	MULTI-MSMS		909.144	3	906.134	2715.38	61886.1	5.454	0.0049421	-0.0025507	-2.31e-06	5.4515	0.0049398	906.468	909.475	90.4	0.29575	92.533	92.3	92.595	2.1332					153	31	9	0	0	0
doa10Δ(H)/WT(L) Rep1	SANLMAGHWVAISGAAGGLGSLAVQYAK	28	1	Oxidation (M)	_SANLM(ox)AGHWVAISGAAGGLGSLAVQYAK_		SANLM(1)AGHWVAISGAAGGLGSLAVQYAK		SANLM(73.21)AGHWVAISGAAGGLGSLAVQYAK	0	0	1	0	P00330	P00330	P00330	ADH1	Alcohol dehydrogenase 1	ISO-MSMS	1	908.809	3	906.134	2715.38	NaN	NaN	NaN	-1.1117	-0.0010073	NaN	NaN	NaN	NaN	88.776	0.36238	90.909	90.676	91.038	2.1332								0	0	0
doa10Δ(H)/WT(L) Rep1	SANLMAGHWVAISGAAGGLGSLAVQYAK	28	1	Oxidation (M)	_SANLM(ox)AGHWVAISGAAGGLGSLAVQYAK_		SANLM(1)AGHWVAISGAAGGLGSLAVQYAK		SANLM(85.42)AGHWVAISGAAGGLGSLAVQYAK	0	0	1	0	P00330	P00330	P00330	ADH1	Alcohol dehydrogenase 1	MSMS	1	908.811	3	906.134	2715.38	NaN	NaN	NaN	NaN	NaN	NaN	NaN	NaN	NaN	86.041	1	88.274	87.774	88.774	2.2335								0	0	0
doa10Δ(H)/WT(L) Rep1	SANLMAGHWVAISGAAGGLGSLAVQYAK	28	1	Oxidation (M)	_SANLM(ox)AGHWVAISGAAGGLGSLAVQYAK_		SANLM(1)AGHWVAISGAAGGLGSLAVQYAK		SANLM(41.48)AGHWVAISGAAGGLGSLAVQYAK	0	0	1	0	P00330	P00330	P00330	ADH1	Alcohol dehydrogenase 1	MULTI-SECPEP		908.979	3	906.134	2715.38	62009.3	5.2232	0.0047329	0.43954	0.00039828	5.6627	0.0051312	906.469	909.475	103.18	0.61758	105.12	104.87	105.48	1.9329					183	64	6	0	0	0
doa10Δ(H)/WT(L) Rep1	SANLMAGHWVAISGAAGGLGSLAVQYAK	28	1	Oxidation (M)	_SANLM(ox)AGHWVAISGAAGGLGSLAVQYAK_					0	0	1	0	P00330	P00330	P00330	ADH1	Alcohol dehydrogenase 1	MULTI-MATCH			3	906.134	2715.38	61848.4	5.5277	0.0050088	-2.3309	-0.0021121	3.1968	0.0028967	906.467	909.138	91.054	0.64152	93.187	92.963	93.605	2.1332	-0.37546	-0.0019111	NaN	57.902	237	70	8	NaN	NaN	NaN
doa10Δ(H)/WT(L) Rep1	SANLMAGHWVAISGAAGGLGSLAVQYAK	28	1	Oxidation (M)	_SANLM(ox)AGHWVAISGAAGGLGSLAVQYAK_					0	0	1	0	P00330	P00330	P00330	ADH1	Alcohol dehydrogenase 1	MULTI-MATCH			3	906.134	2715.38	63211	5.7649	0.0052237	-0.1047	-9.49e-05	5.6602	0.0051289	906.469	908.805	93.117	0.34508	95.25	95.121	95.466	2.1332	1.0387	0.0021303	NaN	73.519	111	36	6	NaN	NaN	NaN
doa10Δ(H)/WT(L) Rep1	SANLMAGHWVAISGAAGGLGSLAVQYAK	28	1	Oxidation (M)	_SANLM(ox)AGHWVAISGAAGGLGSLAVQYAK_					0	0	1	0	P00330	P00330	P00330	ADH1	Alcohol dehydrogenase 1	MULTI-MATCH			3	906.134	2715.38	63531.4	5.7751	0.005233	-0.82895	-0.00075114	4.9461	0.0044819	906.803	909.139	92.93	0.35827	95.063	94.806	95.165	2.1332	-0.18445	-0.00095194	NaN	90.907	128	37	6	NaN	NaN	NaN
doa10Δ(H)/WT(L) Rep1	SANLMAGHWVAISGAAGGLGSLAVQYAK	28	1	Oxidation (M)	_SANLM(ox)AGHWVAISGAAGGLGSLAVQYAK_					0	0	1	0	P00330	P00330	P00330	ADH1	Alcohol dehydrogenase 1	MULTI-MATCH			3	906.134	2715.38	62018.5	5.4132	0.0049051	-0.66595	-0.00060344	4.7473	0.0043017	906.468	909.139	90.074	0.29135	92.207	92.065	92.356	2.1332	0.55069	-0.00070947	NaN	94.403	161	31	8	NaN	NaN	NaN
doa10Δ(H)/WT(L) Rep1	SANLMAGHWVAISGAAGGLGSLAVQYAK	28	1	Oxidation (M)	_SANLM(ox)AGHWVAISGAAGGLGSLAVQYAK_					0	0	1	0	P00330	P00330	P00330	ADH1	Alcohol dehydrogenase 1	MULTI-MATCH			3	906.134	2715.38	63029.2	5.5828	0.0050588	-0.019289	-1.75e-05	5.5635	0.0050413	906.468	909.14	93.877	0.20695	96.01	95.899	96.106	2.1332	0.51255	0.00079668	NaN	79.163	54	20	4	NaN	NaN	NaN
doa10Δ(H)/WT(L) Rep1	SANLMAGHWVAISGAAGGLGSLAVQYAK	28	1	Oxidation (M)	_SANLM(ox)AGHWVAISGAAGGLGSLAVQYAK_					0	0	1	0	P00330	P00330	P00330	ADH1	Alcohol dehydrogenase 1	MULTI-MATCH			3	906.134	2715.38	63183.7	5.6406	0.0051112	0.1194	0.00010819	5.76	0.0052194	906.469	909.14	93.647	0.53012	95.781	95.466	95.997	2.1332	0.008468	0.0010904	NaN	52.059	178	54	6	NaN	NaN	NaN
doa10Δ(H)/WT(L) Rep1	SANLMAGHWVAISGAAGGLGSLAVQYAK	28	1	Oxidation (M)	_SANLM(ox)AGHWVAISGAAGGLGSLAVQYAK_					0	0	1	0	P00330	P00330	P00330	ADH1	Alcohol dehydrogenase 1	MULTI-MATCH			3	906.134	2715.38	63032.1	5.2821	0.0047863	-0.22057	-0.00019986	5.0615	0.0045864	906.469	909.139	101.56	0.40736	103.6	103.44	103.85	2.0331	-0.35412	-0.0002709	NaN	52.773	85	41	5	NaN	NaN	NaN
doa10Δ(H)/WT(L) Rep1	SANLMAGHWVAISGAAGGLGSLAVQYAK	28	1	Oxidation (M)	_SANLM(ox)AGHWVAISGAAGGLGSLAVQYAK_					0	0	1	0	P00330	P00330	P00330	ADH1	Alcohol dehydrogenase 1	MULTI-MATCH			3	906.134	2715.38	63725.5	5.4726	0.0049589	0.099214	8.99e-05	5.5718	0.0050488	906.468	909.14	96.245	0.31432	98.278	98.142	98.456	2.0331	-0.038325	0.00059062	NaN	45.042	68	32	4	NaN	NaN	NaN
doa10Δ(H)/WT(L) Rep1	SANLMAGHWVAISGAAGGLGSLAVQYAK	28	1	Oxidation (M)	_SANLM(ox)AGHWVAISGAAGGLGSLAVQYAK_					0	0	1	0	P00330	P00330	P00330	ADH1	Alcohol dehydrogenase 1	MULTI-MATCH			3	906.134	2715.38	62122.7	5.37	0.0048659	-0.24717	-0.00022397	5.1228	0.004642	906.468	909.139	85.495	0.29151	87.729	87.578	87.87	2.2335	-0.084007	-0.00047971	NaN	112.55	236	31	10	NaN	NaN	NaN
doa10Δ(H)/WT(L) Rep1	SANLMAGHWVAISGAAGGLGSLAVQYAK	28	1	Oxidation (M)	_SANLM(ox)AGHWVAISGAAGGLGSLAVQYAK_					0	0	1	0	P00330	P00330	P00330	ADH1	Alcohol dehydrogenase 1	MULTI-MATCH			4	679.852	2715.38	70293.8	5.4569	0.0037099	-0.52208	-0.00035494	4.9348	0.0033549	680.353	682.357	85.707	0.18588	87.941	87.852	88.038	2.2335	0.3216	-0.0012382	NaN	49.141	49	19	5	NaN	NaN	NaN
doa10Δ(H)/WT(L) Rep1	SANLMAGHWVAISGAAGGLGSLAVQYAK	28	1	Oxidation (M)	_SANLM(ox)AGHWVAISGAAGGLGSLAVQYAK_					0	0	1	0	P00330	P00330	P00330	ADH1	Alcohol dehydrogenase 1	MULTI-MATCH			4	679.852	2715.38	72799.8	5.713	0.003884	-0.11824	-8.04e-05	5.5948	0.0038036	680.103	682.107	84.552	0.82574	86.785	86.255	87.081	2.2335	0.26612	-0.00034976	NaN	78.978	354	85	10	NaN	NaN	NaN
doa10Δ(H)/WT(L) Rep1	SANLMAGHWVAISGAAGGLGSLAVQYAK	28	1	Unmodified	_SANLMAGHWVAISGAAGGLGSLAVQYAK_					0	0	0	0	P00330	P00330	P00330	ADH1	Alcohol dehydrogenase 1	MULTI-MSMS		901.143	3	900.802	2699.39	62031.7	5.5221	0.0049743	-0.23982	-0.00021603	5.2823	0.0047583	901.137	903.808	90.983	0.72997	93.117	92.408	93.138	2.1332					725	77	12	0	0	0
doa10Δ(H)/WT(L) Rep1	SANLMAGHWVAISGAAGGLGSLAVQYAK	28	1	Unmodified	_SANLMAGHWVAISGAAGGLGSLAVQYAK_					0	0	0	0	P00330	P00330	P00330	ADH1	Alcohol dehydrogenase 1	MULTI-MSMS		678.113	4	675.854	2699.39	72588.8	5.5978	0.0037833	0.61468	0.00041544	6.2125	0.0041987	676.105	678.108	91.239	1.095	93.372	92.632	93.727	2.1332					804	119	12	0	0	0
doa10Δ(H)/WT(L) Rep1	SANLMAGHWVAISGAAGGLGSLAVQYAK	28	1	Unmodified	_SANLMAGHWVAISGAAGGLGSLAVQYAK_					0	0	0	0	P00330	P00330	P00330	ADH1	Alcohol dehydrogenase 1	MULTI-MSMS		901.142	3	900.802	2699.39	61676.6	5.5297	0.0049812	0.033495	3.02e-05	5.5632	0.0050114	901.137	903.808	91.239	0.59716	93.372	93.13	93.727	2.1332					821	65	14	0	0	0
doa10Δ(H)/WT(L) Rep1	SANLMAGHWVAISGAAGGLGSLAVQYAK	28	1	Unmodified	_SANLMAGHWVAISGAAGGLGSLAVQYAK_					0	0	0	0	P00330	P00330	P00330	ADH1	Alcohol dehydrogenase 1	MULTI-MSMS		677.861	4	675.854	2699.39	72292.9	5.583	0.0037733	0.48075	0.00032491	6.0638	0.0040982	676.356	678.108	91.683	0.28632	93.816	93.693	93.979	2.1332					159	32	9	0	0	0
doa10Δ(H)/WT(L) Rep1	SANLMAGHWVAISGAAGGLGSLAVQYAK	28	1	Unmodified	_SANLMAGHWVAISGAAGGLGSLAVQYAK_					0	0	0	0	P00330	P00330	P00330	ADH1	Alcohol dehydrogenase 1	MULTI-MSMS		901.14	3	900.802	2699.39	62723.8	5.5134	0.0049665	-0.11328	-0.00010204	5.4002	0.0048645	901.137	903.808	91.671	0.21536	93.804	93.693	93.908	2.1332					165	24	9	0	0	0
doa10Δ(H)/WT(L) Rep1	SANLMAGHWVAISGAAGGLGSLAVQYAK	28	1	Unmodified	_SANLMAGHWVAISGAAGGLGSLAVQYAK_					0	0	0	0	P00330	P00330	P00330	ADH1	Alcohol dehydrogenase 1	MULTI-MSMS		903.814	3	900.802	2699.39	61685.8	5.5305	0.0049819	0.19253	0.00017343	5.723	0.0051553	901.137	903.808	91.932	0.92053	94.066	93.693	94.613	2.1332					756	102	13	0	0	0
doa10Δ(H)/WT(L) Rep1	SANLMAGHWVAISGAAGGLGSLAVQYAK	28	1	Unmodified	_SANLMAGHWVAISGAAGGLGSLAVQYAK_					0	0	0	0	P00330	P00330	P00330	ADH1	Alcohol dehydrogenase 1	MULTI-MSMS		903.812	3	900.802	2699.39	62723.8	5.7332	0.0051645	-0.21827	-0.00019662	5.515	0.0049679	901.137	903.808	92.817	0.57755	94.95	94.561	95.139	2.1332					560	60	13	0	0	0
doa10Δ(H)/WT(L) Rep1	SANLMAGHWVAISGAAGGLGSLAVQYAK	28	1	Unmodified	_SANLMAGHWVAISGAAGGLGSLAVQYAK_					0	0	0	0	P00330	P00330	P00330	ADH1	Alcohol dehydrogenase 1	MULTI-MSMS		901.142	3	900.802	2699.39	62552.2	5.7396	0.0051702	-0.017968	-1.62e-05	5.7216	0.005154	901.137	903.808	93.213	0.60034	95.346	95.077	95.677	2.1332					484	63	10	0	0	0
doa10Δ(H)/WT(L) Rep1	SANLMAGHWVAISGAAGGLGSLAVQYAK	28	1	Unmodified	_SANLMAGHWVAISGAAGGLGSLAVQYAK_					0	0	0	0	P00330	P00330	P00330	ADH1	Alcohol dehydrogenase 1	MULTI-MSMS		678.111	4	675.854	2699.39	73966.9	5.767	0.0038976	0.52939	0.00035779	6.2964	0.0042554	676.106	677.857	93.44	0.40083	95.573	95.277	95.677	2.1332					135	41	9	0	0	0
doa10Δ(H)/WT(L) Rep1	SANLMAGHWVAISGAAGGLGSLAVQYAK	28	1	Unmodified	_SANLMAGHWVAISGAAGGLGSLAVQYAK_					0	0	0	0	P00330	P00330	P00330	ADH1	Alcohol dehydrogenase 1	MULTI-MSMS		901.141	3	900.802	2699.39	62736.7	5.6318	0.0050731	0.2706	0.00024376	5.9024	0.0053169	901.137	903.808	93.601	0.59348	95.734	95.649	96.242	2.1332					367	60	10	0	0	0
doa10Δ(H)/WT(L) Rep1	SANLMAGHWVAISGAAGGLGSLAVQYAK	28	1	Unmodified	_SANLMAGHWVAISGAAGGLGSLAVQYAK_					0	0	0	0	P00330	P00330	P00330	ADH1	Alcohol dehydrogenase 1	MULTI-MSMS		903.813	3	900.802	2699.39	62736.6	5.5065	0.0049603	-0.11463	-0.00010326	5.3919	0.004857	901.137	903.808	94.271	0.31845	96.405	96.224	96.543	2.1332					250	32	10	0	0	0
doa10Δ(H)/WT(L) Rep1	SANLMAGHWVAISGAAGGLGSLAVQYAK	28	1	Unmodified	_SANLMAGHWVAISGAAGGLGSLAVQYAK_					0	0	0	0	P00330	P00330	P00330	ADH1	Alcohol dehydrogenase 1	MULTI-MSMS		901.142	3	900.802	2699.39	62723.8	5.4617	0.0049199	-0.64753	-0.0005833	4.8141	0.0043366	901.137	903.808	94.47	0.53021	96.603	96.428	96.958	2.1332					362	55	11	0	0	0
doa10Δ(H)/WT(L) Rep1	SANLMAGHWVAISGAAGGLGSLAVQYAK	28	1	Unmodified	_SANLMAGHWVAISGAAGGLGSLAVQYAK_					0	0	0	0	P00330	P00330	P00330	ADH1	Alcohol dehydrogenase 1	MULTI-MSMS		904.14	3	900.802	2699.39	62723.8	5.4361	0.0048968	-0.79847	-0.00071926	4.6376	0.0041776	901.137	903.807	94.983	0.50856	97.016	96.703	97.212	2.0331					400	53	9	0	0	0
doa10Δ(H)/WT(L) Rep1	SANLMAGHWVAISGAAGGLGSLAVQYAK	28	1	Unmodified	_SANLMAGHWVAISGAAGGLGSLAVQYAK_					0	0	0	0	P00330	P00330	P00330	ADH1	Alcohol dehydrogenase 1	MULTI-MSMS		903.813	3	900.802	2699.39	62363.5	5.4611	0.0049194	-0.50929	-0.00045877	4.9518	0.0044606	901.137	903.808	96.001	0.69714	98.034	97.866	98.563	2.0331					401	73	11	0	0	0
doa10Δ(H)/WT(L) Rep1	SANLMAGHWVAISGAAGGLGSLAVQYAK	28	1	Unmodified	_SANLMAGHWVAISGAAGGLGSLAVQYAK_					0	0	0	0	P00330	P00330	P00330	ADH1	Alcohol dehydrogenase 1	MULTI-MSMS		676.358	4	675.854	2699.39	74162.1	5.5339	0.0037401	-0.44697	-0.00030209	5.087	0.003438	676.104	678.358	96.061	0.33619	98.094	97.956	98.293	2.0331					108	35	9	0	0	0
doa10Δ(H)/WT(L) Rep1	SANLMAGHWVAISGAAGGLGSLAVQYAK	28	1	Unmodified	_SANLMAGHWVAISGAAGGLGSLAVQYAK_					0	0	0	0	P00330	P00330	P00330	ADH1	Alcohol dehydrogenase 1	MULTI-MSMS		903.812	3	900.802	2699.39	62723.8	5.4995	0.004954	-0.07498	-6.75e-05	5.4245	0.0048864	901.471	903.808	96.639	0.20603	98.773	98.644	98.851	2.1334					165	21	9	0	0	0
doa10Δ(H)/WT(L) Rep1	SANLMAGHWVAISGAAGGLGSLAVQYAK	28	1	Unmodified	_SANLMAGHWVAISGAAGGLGSLAVQYAK_					0	0	0	0	P00330	P00330	P00330	ADH1	Alcohol dehydrogenase 1	MULTI-MSMS		903.48	3	900.802	2699.39	62778.8	5.4353	0.0048961	0.26393	0.00023775	5.6992	0.0051338	901.137	903.809	96.846	0.37657	98.979	98.842	99.218	2.1334					288	39	11	0	0	0
doa10Δ(H)/WT(L) Rep1	SANLMAGHWVAISGAAGGLGSLAVQYAK	28	1	Unmodified	_SANLMAGHWVAISGAAGGLGSLAVQYAK_					0	0	0	0	P00330	P00330	P00330	ADH1	Alcohol dehydrogenase 1	MULTI-MSMS		901.141	3	900.802	2699.39	62383.1	5.3227	0.0047947	0.0070775	6.38e-06	5.3297	0.004801	901.137	903.808	97.339	0.48131	99.473	99.209	99.69	2.1334					380	48	13	0	0	0
doa10Δ(H)/WT(L) Rep1	SANLMAGHWVAISGAAGGLGSLAVQYAK	28	1	Unmodified	_SANLMAGHWVAISGAAGGLGSLAVQYAK_					0	0	0	0	P00330	P00330	P00330	ADH1	Alcohol dehydrogenase 1	MULTI-MSMS		901.141	3	900.802	2699.39	62312.4	5.231	0.0047121	0.045815	4.13e-05	5.2768	0.0047534	901.137	903.808	97.635	0.33849	99.768	99.571	99.91	2.1334					273	35	12	0	0	0
doa10Δ(H)/WT(L) Rep1	SANLMAGHWVAISGAAGGLGSLAVQYAK	28	1	Unmodified	_SANLMAGHWVAISGAAGGLGSLAVQYAK_					0	0	0	0	P00330	P00330	P00330	ADH1	Alcohol dehydrogenase 1	MULTI-MSMS		904.147	3	900.802	2699.39	62543.2	5.1717	0.0046587	0.28094	0.00025307	5.4527	0.0049118	901.137	903.809	97.814	0.23313	99.947	99.858	100.09	2.1334					177	24	10	0	0	0
doa10Δ(H)/WT(L) Rep1	SANLMAGHWVAISGAAGGLGSLAVQYAK	28	1	Unmodified	_SANLMAGHWVAISGAAGGLGSLAVQYAK_					0	0	0	0	P00330	P00330	P00330	ADH1	Alcohol dehydrogenase 1	MULTI-MSMS		904.146	3	900.802	2699.39	62643.9	5.1904	0.0046755	-0.19569	-0.00017627	4.9947	0.0044993	901.137	903.808	98.446	0.11024	100.58	100.54	100.65	2.1334					90	11	10	0	0	0
doa10Δ(H)/WT(L) Rep1	SANLMAGHWVAISGAAGGLGSLAVQYAK	28	1	Unmodified	_SANLMAGHWVAISGAAGGLGSLAVQYAK_					0	0	0	0	P00330	P00330	P00330	ADH1	Alcohol dehydrogenase 1	MULTI-MSMS		900.806	3	900.802	2699.39	62723.8	5.2085	0.0046918	-0.2228	-0.0002007	4.9857	0.0044911	901.136	903.808	98.573	0.1978	100.71	100.63	100.83	2.1334					160	20	11	0	0	0
doa10Δ(H)/WT(L) Rep1	SANLMAGHWVAISGAAGGLGSLAVQYAK	28	1	Unmodified	_SANLMAGHWVAISGAAGGLGSLAVQYAK_					0	0	0	0	P00330	P00330	P00330	ADH1	Alcohol dehydrogenase 1	MULTI-MSMS		903.813	3	900.802	2699.39	62643.8	5.2369	0.0047175	-0.24701	-0.00022251	4.9899	0.0044949	901.137	903.808	98.804	0.26723	100.94	100.79	101.06	2.1334					257	27	14	0	0	0
doa10Δ(H)/WT(L) Rep1	SANLMAGHWVAISGAAGGLGSLAVQYAK	28	1	Unmodified	_SANLMAGHWVAISGAAGGLGSLAVQYAK_					0	0	0	0	P00330	P00330	P00330	ADH1	Alcohol dehydrogenase 1	MULTI-MSMS		901.141	3	900.802	2699.39	62683.8	5.2641	0.0047419	-0.38278	-0.00034481	4.8813	0.0043971	901.47	903.808	99.008	0.19797	101.14	101.03	101.23	2.1334					184	20	11	0	0	0
doa10Δ(H)/WT(L) Rep1	SANLMAGHWVAISGAAGGLGSLAVQYAK	28	1	Unmodified	_SANLMAGHWVAISGAAGGLGSLAVQYAK_					0	0	0	0	P00330	P00330	P00330	ADH1	Alcohol dehydrogenase 1	MULTI-MSMS		901.141	3	900.802	2699.39	62683.8	5.2937	0.0047686	0.099455	8.96e-05	5.3932	0.0048582	901.137	903.808	99.208	0.29294	101.34	101.21	101.5	2.1334					244	30	12	0	0	0
doa10Δ(H)/WT(L) Rep1	SANLMAGHWVAISGAAGGLGSLAVQYAK	28	1	Unmodified	_SANLMAGHWVAISGAAGGLGSLAVQYAK_					0	0	0	0	P00330	P00330	P00330	ADH1	Alcohol dehydrogenase 1	MULTI-MSMS		904.147	3	900.802	2699.39	62723.8	5.3208	0.004793	-0.0034674	-3.12e-06	5.3174	0.0047899	901.137	903.808	99.435	0.21329	101.57	101.44	101.65	2.1334					159	23	9	0	0	0
doa10Δ(H)/WT(L) Rep1	SANLMAGHWVAISGAAGGLGSLAVQYAK	28	1	Unmodified	_SANLMAGHWVAISGAAGGLGSLAVQYAK_					0	0	0	0	P00330	P00330	P00330	ADH1	Alcohol dehydrogenase 1	MULTI-MSMS		901.142	3	900.802	2699.39	62683.8	5.3395	0.0048098	0.1644	0.00014809	5.5039	0.0049579	901.137	903.808	99.636	0.39561	101.77	101.6	102	2.1334					304	44	12	0	0	0
doa10Δ(H)/WT(L) Rep1	SANLMAGHWVAISGAAGGLGSLAVQYAK	28	1	Unmodified	_SANLMAGHWVAISGAAGGLGSLAVQYAK_					0	0	0	0	P00330	P00330	P00330	ADH1	Alcohol dehydrogenase 1	MULTI-MSMS		677.861	4	675.854	2699.39	71386.8	5.3715	0.0036304	1.2672	0.00085647	6.6388	0.0044868	676.105	678.109	99.942	0.26646	101.98	101.89	102.15	2.0331					82	29	6	0	0	0
doa10Δ(H)/WT(L) Rep1	SANLMAGHWVAISGAAGGLGSLAVQYAK	28	1	Unmodified	_SANLMAGHWVAISGAAGGLGSLAVQYAK_					0	0	0	0	P00330	P00330	P00330	ADH1	Alcohol dehydrogenase 1	MULTI-MSMS		901.144	3	900.802	2699.39	62778.8	5.3062	0.0047799	0.16298	0.00014681	5.4692	0.0049267	901.137	903.808	99.943	0.2835	101.98	101.86	102.14	2.0331					274	31	12	0	0	0
doa10Δ(H)/WT(L) Rep1	SANLMAGHWVAISGAAGGLGSLAVQYAK	28	1	Unmodified	_SANLMAGHWVAISGAAGGLGSLAVQYAK_					0	0	0	0	P00330	P00330	P00330	ADH1	Alcohol dehydrogenase 1	MULTI-MSMS		903.813	3	900.802	2699.39	62723.8	5.2822	0.0047582	-0.0011732	-1.06e-06	5.281	0.0047571	901.137	903.808	100.17	0.27931	102.2	102.1	102.38	2.0331					202	31	12	0	0	0
doa10Δ(H)/WT(L) Rep1	SANLMAGHWVAISGAAGGLGSLAVQYAK	28	1	Unmodified	_SANLMAGHWVAISGAAGGLGSLAVQYAK_					0	0	0	0	P00330	P00330	P00330	ADH1	Alcohol dehydrogenase 1	MULTI-MSMS		901.143	3	900.802	2699.39	62723.8	5.2655	0.0047431	-0.10923	-9.84e-05	5.1562	0.0046448	901.137	903.808	100.62	0.81557	102.65	102.37	103.18	2.0331					553	88	11	0	0	0
doa10Δ(H)/WT(L) Rep1	SANLMAGHWVAISGAAGGLGSLAVQYAK	28	1	Unmodified	_SANLMAGHWVAISGAAGGLGSLAVQYAK_					0	0	0	0	P00330	P00330	P00330	ADH1	Alcohol dehydrogenase 1	MULTI-MSMS		901.142	3	900.802	2699.39	62723.8	5.2838	0.0047597	0.017582	1.58e-05	5.3014	0.0047755	901.137	904.142	101.07	0.26505	103.1	102.93	103.19	2.0331					80	27	5	0	0	0
doa10Δ(H)/WT(L) Rep1	SANLMAGHWVAISGAAGGLGSLAVQYAK	28	1	Unmodified	_SANLMAGHWVAISGAAGGLGSLAVQYAK_					0	0	0	0	P00330	P00330	P00330	ADH1	Alcohol dehydrogenase 1	MULTI-MSMS		903.814	3	900.802	2699.39	62478.8	5.2946	0.0047694	-0.48118	-0.00043345	4.8134	0.0043359	901.137	903.808	101.33	0.28816	103.36	103.16	103.44	2.0331					255	30	12	0	0	0
doa10Δ(H)/WT(L) Rep1	SANLMAGHWVAISGAAGGLGSLAVQYAK	28	1	Unmodified	_SANLMAGHWVAISGAAGGLGSLAVQYAK_					0	0	0	0	P00330	P00330	P00330	ADH1	Alcohol dehydrogenase 1	MULTI-MSMS		678.111	4	675.854	2699.39	74740.1	5.3591	0.003622	0.67039	0.00045309	6.0295	0.004075	676.356	678.108	101.28	0.17594	103.32	103.19	103.37	2.0331					74	18	8	0	0	0
doa10Δ(H)/WT(L) Rep1	SANLMAGHWVAISGAAGGLGSLAVQYAK	28	1	Unmodified	_SANLMAGHWVAISGAAGGLGSLAVQYAK_					0	0	0	0	P00330	P00330	P00330	ADH1	Alcohol dehydrogenase 1	MULTI-MSMS		903.812	3	900.802	2699.39	62490.2	5.2964	0.004771	-0.48145	-0.00043369	4.8149	0.0043373	901.136	903.808	101.48	0.16394	103.51	103.41	103.57	2.0331					120	16	9	0	0	0
doa10Δ(H)/WT(L) Rep1	SANLMAGHWVAISGAAGGLGSLAVQYAK	28	1	Unmodified	_SANLMAGHWVAISGAAGGLGSLAVQYAK_					0	0	0	0	P00330	P00330	P00330	ADH1	Alcohol dehydrogenase 1	MULTI-MSMS		903.812	3	900.802	2699.39	62723.8	5.287	0.0047625	-0.20331	-0.00018314	5.0837	0.0045794	901.137	903.808	101.97	0.35241	104	103.81	104.16	2.0331					218	37	9	0	0	0
doa10Δ(H)/WT(L) Rep1	SANLMAGHWVAISGAAGGLGSLAVQYAK	28	1	Unmodified	_SANLMAGHWVAISGAAGGLGSLAVQYAK_					0	0	0	0	P00330	P00330	P00330	ADH1	Alcohol dehydrogenase 1	MULTI-MSMS		901.143	3	900.802	2699.39	62606.8	5.2814	0.0047575	-0.098293	-8.85e-05	5.1831	0.0046689	901.137	903.808	102.22	0.46832	104.26	104.07	104.54	2.0331					346	49	10	0	0	0
doa10Δ(H)/WT(L) Rep1	SANLMAGHWVAISGAAGGLGSLAVQYAK	28	1	Unmodified	_SANLMAGHWVAISGAAGGLGSLAVQYAK_					0	0	0	0	P00330	P00330	P00330	ADH1	Alcohol dehydrogenase 1	MULTI-MSMS		903.812	3	900.802	2699.39	62606.8	5.276	0.0047526	-0.047972	-4.32e-05	5.228	0.0047094	901.137	903.808	102.57	0.30652	104.5	104.34	104.65	1.9329					203	32	10	0	0	0
doa10Δ(H)/WT(L) Rep1	SANLMAGHWVAISGAAGGLGSLAVQYAK	28	1	Unmodified	_SANLMAGHWVAISGAAGGLGSLAVQYAK_					0	0	0	0	P00330	P00330	P00330	ADH1	Alcohol dehydrogenase 1	MULTI-MSMS		901.14	3	900.802	2699.39	62478.8	5.2681	0.0047455	-0.059599	-5.37e-05	5.2085	0.0046918	901.137	903.808	102.84	0.48929	104.77	104.59	105.08	1.9329					366	51	12	0	0	0
doa10Δ(H)/WT(L) Rep1	SANLMAGHWVAISGAAGGLGSLAVQYAK	28	1	Unmodified	_SANLMAGHWVAISGAAGGLGSLAVQYAK_					0	0	0	0	P00330	P00330	P00330	ADH1	Alcohol dehydrogenase 1	MULTI-MSMS		903.813	3	900.802	2699.39	62478.8	5.2248	0.0047065	0.016997	1.53e-05	5.2418	0.0047218	901.137	904.142	103.24	0.45278	105.17	105.04	105.49	1.9329					372	47	12	0	0	0
doa10Δ(H)/WT(L) Rep1	SANLMAGHWVAISGAAGGLGSLAVQYAK	28	1	Unmodified	_SANLMAGHWVAISGAAGGLGSLAVQYAK_					0	0	0	0	P00330	P00330	P00330	ADH1	Alcohol dehydrogenase 1	MULTI-MSMS		903.812	3	900.802	2699.39	62723.8	5.1759	0.0046625	0.02843	2.56e-05	5.2043	0.0046881	901.137	903.808	103.69	0.71739	105.63	105.47	106.19	1.9329					548	77	11	0	0	0
doa10Δ(H)/WT(L) Rep1	SANLMAGHWVAISGAAGGLGSLAVQYAK	28	1	Unmodified	_SANLMAGHWVAISGAAGGLGSLAVQYAK_					0	0	0	0	P00330	P00330	P00330	ADH1	Alcohol dehydrogenase 1	MULTI-MSMS		901.14	3	900.802	2699.39	62703.8	5.1152	0.0046078	0.20853	0.00018784	5.3237	0.0047956	901.137	903.808	104.37	0.94984	106.3	105.94	106.89	1.9329					544	102	10	0	0	0
doa10Δ(H)/WT(L) Rep1	SANLMAGHWVAISGAAGGLGSLAVQYAK	28	1	Unmodified	_SANLMAGHWVAISGAAGGLGSLAVQYAK_					0	0	0	0	P00330	P00330	P00330	ADH1	Alcohol dehydrogenase 1	MULTI-MSMS		901.141	3	900.802	2699.39	62654	5.0596	0.0045577	0.16026	0.00014436	5.2199	0.0047021	901.137	903.808	105.18	0.80353	107.01	106.44	107.24	1.8327					391	89	10	0	0	0
doa10Δ(H)/WT(L) Rep1	SANLMAGHWVAISGAAGGLGSLAVQYAK	28	1	Unmodified	_SANLMAGHWVAISGAAGGLGSLAVQYAK_					0	0	0	0	P00330	P00330	P00330	ADH1	Alcohol dehydrogenase 1	MULTI-MSMS		901.142	3	900.802	2699.39	62810.9	5.0961	0.0045906	0.18663	0.00016811	5.2828	0.0047587	901.137	903.808	105.62	0.85086	107.45	107.19	108.04	1.8327					255	93	6	0	0	0
doa10Δ(H)/WT(L) Rep1	SANLMAGHWVAISGAAGGLGSLAVQYAK	28	1	Unmodified	_SANLMAGHWVAISGAAGGLGSLAVQYAK_					0	0	0	0	P00330	P00330	P00330	ADH1	Alcohol dehydrogenase 1	MULTI-MSMS		901.143	3	900.802	2699.39	62651.3	5.1925	0.0046774	0.33718	0.00030374	5.5296	0.0049811	901.137	903.808	106.58	1.1653	108.31	107.83	108.99	1.7324					617	127	10	0	0	0
doa10Δ(H)/WT(L) Rep1	SANLMAGHWVAISGAAGGLGSLAVQYAK	28	1	Unmodified	_SANLMAGHWVAISGAAGGLGSLAVQYAK_					0	0	0	0	P00330	P00330	P00330	ADH1	Alcohol dehydrogenase 1	MULTI-MSMS		901.142	3	900.802	2699.39	62579	5.2371	0.0047176	0.73457	0.0006617	5.9716	0.0053793	901.137	903.808	107.21	0.34678	108.84	108.61	108.96	1.6322					247	38	9	0	0	0
doa10Δ(H)/WT(L) Rep1	SANLMAGHWVAISGAAGGLGSLAVQYAK	28	1	Unmodified	_SANLMAGHWVAISGAAGGLGSLAVQYAK_					0	0	0	0	P00330	P00330	P00330	ADH1	Alcohol dehydrogenase 1	MULTI-MSMS		903.812	3	900.802	2699.39	62651.3	5.2361	0.0047167	-0.25844	-0.00023281	4.9777	0.0044839	901.137	904.142	107.41	0.34628	109.04	108.89	109.24	1.6322					239	39	8	0	0	0
doa10Δ(H)/WT(L) Rep1	SANLMAGHWVAISGAAGGLGSLAVQYAK	28	1	Unmodified	_SANLMAGHWVAISGAAGGLGSLAVQYAK_					0	0	0	0	P00330	P00330	P00330	ADH1	Alcohol dehydrogenase 1	MULTI-MSMS		903.476	3	900.802	2699.39	62723.8	5.2157	0.0046983	0.13077	0.0001178	5.3465	0.0048161	901.137	903.808	107.75	0.49255	109.38	109.13	109.63	1.6322					248	54	11	0	0	0
doa10Δ(H)/WT(L) Rep1	SANLMAGHWVAISGAAGGLGSLAVQYAK	28	1	Unmodified	_SANLMAGHWVAISGAAGGLGSLAVQYAK_					0	0	0	0	P00330	P00330	P00330	ADH1	Alcohol dehydrogenase 1	MULTI-MSMS		903.813	3	900.802	2699.39	62810.9	5.1804	0.0046665	0.22591	0.0002035	5.4063	0.00487	901.137	903.808	108.2	0.52608	109.83	109.52	110.05	1.6322					370	56	10	0	0	0
doa10Δ(H)/WT(L) Rep1	SANLMAGHWVAISGAAGGLGSLAVQYAK	28	1	Unmodified	_SANLMAGHWVAISGAAGGLGSLAVQYAK_					0	0	0	0	P00330	P00330	P00330	ADH1	Alcohol dehydrogenase 1	MULTI-MSMS		903.813	3	900.802	2699.39	62810.9	5.1462	0.0046357	0.22733	0.00020478	5.3736	0.0048405	901.471	903.808	108.63	0.66597	110.26	109.93	110.6	1.6322					467	70	10	0	0	0
doa10Δ(H)/WT(L) Rep1	SANLMAGHWVAISGAAGGLGSLAVQYAK	28	1	Unmodified	_SANLMAGHWVAISGAAGGLGSLAVQYAK_					0	0	0	0	P00330	P00330	P00330	ADH1	Alcohol dehydrogenase 1	MULTI-MSMS		903.813	3	900.802	2699.39	62728	5.0922	0.0045871	0.5222	0.0004704	5.6144	0.0050575	901.137	903.808	109.33	0.67384	110.96	110.58	111.25	1.6322					443	71	10	0	0	0
doa10Δ(H)/WT(L) Rep1	SANLMAGHWVAISGAAGGLGSLAVQYAK	28	1	Unmodified	_SANLMAGHWVAISGAAGGLGSLAVQYAK_					0	0	0	0	P00330	P00330	P00330	ADH1	Alcohol dehydrogenase 1	MULTI-MSMS		901.141	3	900.802	2699.39	62732.1	5.0556	0.0045541	-0.076669	-6.91e-05	4.9789	0.004485	901.137	903.808	109.74	0.4703	111.27	111.05	111.52	1.5319					323	50	9	0	0	0
doa10Δ(H)/WT(L) Rep1	SANLMAGHWVAISGAAGGLGSLAVQYAK	28	1	Unmodified	_SANLMAGHWVAISGAAGGLGSLAVQYAK_					0	0	0	0	P00330	P00330	P00330	ADH1	Alcohol dehydrogenase 1	MULTI-MSMS		901.14	3	900.802	2699.39	62898.1	5.0002	0.0045042	-0.48241	-0.00043456	4.5178	0.0040697	901.136	903.808	110.13	0.41692	111.66	111.5	111.92	1.5319					180	48	7	0	0	0
doa10Δ(H)/WT(L) Rep1	SANLMAGHWVAISGAAGGLGSLAVQYAK	28	1	Unmodified	_SANLMAGHWVAISGAAGGLGSLAVQYAK_					0	0	0	0	P00330	P00330	P00330	ADH1	Alcohol dehydrogenase 1	MULTI-MSMS		903.813	3	900.802	2699.39	62606.9	4.3062	0.0038791	0.74305	0.00066934	5.0493	0.0045484	901.137	903.809	111.39	1.487	111.92	110.69	112.18	0.52949					1126	163	10	0	0	0
doa10Δ(H)/WT(L) Rep1	SANLMAGHWVAISGAAGGLGSLAVQYAK	28	1	Unmodified	_SANLMAGHWVAISGAAGGLGSLAVQYAK_					0	0	0	0	P00330	P00330	P00330	ADH1	Alcohol dehydrogenase 1	MULTI-MSMS		903.811	3	900.802	2699.39	62926.9	3.9199	0.003531	0.68487	0.00061693	4.6048	0.004148	901.137	903.809	111.78	0.51987	112.3	111.96	112.48	0.52949					116	42	4	0	0	0
doa10Δ(H)/WT(L) Rep1	SANLMAGHWVAISGAAGGLGSLAVQYAK	28	1	Unmodified	_SANLMAGHWVAISGAAGGLGSLAVQYAK_					0	0	0	0	P00330	P00330	P00330	ADH1	Alcohol dehydrogenase 1	MULTI-MSMS		903.478	3	900.802	2699.39	64101.4	3.3516	0.0030191	-0.33801	-0.00030448	3.0136	0.0027147	901.137	904.142	112.35	0.66339	112.78	112.38	113.04	0.42924					113	28	7	0	0	0
doa10Δ(H)/WT(L) Rep1	SANLMAGHWVAISGAAGGLGSLAVQYAK	28	1	Unmodified	_SANLMAGHWVAISGAAGGLGSLAVQYAK_					0	0	0	0	P00330	P00330	P00330	ADH1	Alcohol dehydrogenase 1	MULTI-MSMS		903.813	3	900.802	2699.39	63820.5	3.0253	0.0027252	0.74232	0.00066869	3.7676	0.0033939	901.137	903.809	112.77	1.0797	113.2	113.05	114.13	0.42924					416	114	10	0	0	0
doa10Δ(H)/WT(L) Rep1	SANLMAGHWVAISGAAGGLGSLAVQYAK	28	1	Unmodified	_SANLMAGHWVAISGAAGGLGSLAVQYAK_					0	0	0	0	P00330	P00330	P00330	ADH1	Alcohol dehydrogenase 1	ISO-MSMS	1	678.112	4	675.854	2699.39	NaN	NaN	NaN	0.14992	0.00010132	NaN	NaN	NaN	NaN	91.946	0.46797	94.079	93.908	94.376	2.1332								0	0	0
doa10Δ(H)/WT(L) Rep1	SANLMAGHWVAISGAAGGLGSLAVQYAK	28	1	Unmodified	_SANLMAGHWVAISGAAGGLGSLAVQYAK_					0	0	0	0	P00330	P00330	P00330	ADH1	Alcohol dehydrogenase 1	ISO-MSMS	1	904.137	3	900.802	2699.39	NaN	NaN	NaN	-2.4944	-0.0022469	NaN	NaN	NaN	NaN	95.341	0.46681	97.375	97.167	97.634	2.0331								0	0	0
doa10Δ(H)/WT(L) Rep1	SANLMAGHWVAISGAAGGLGSLAVQYAK	28	1	Unmodified	_SANLMAGHWVAISGAAGGLGSLAVQYAK_					0	0	0	0	P00330	P00330	P00330	ADH1	Alcohol dehydrogenase 1	ISO-MSMS	0	901.473	3	900.802	2699.39	NaN	NaN	NaN	-0.37163	-0.00033476	NaN	NaN	NaN	NaN	96.145	0.49612	98.179	98.077	98.573	2.0331								0	0	0
doa10Δ(H)/WT(L) Rep1	SANLMAGHWVAISGAAGGLGSLAVQYAK	28	1	Unmodified	_SANLMAGHWVAISGAAGGLGSLAVQYAK_					0	0	0	0	P00330	P00330	P00330	ADH1	Alcohol dehydrogenase 1	ISO-MSMS	1	903.813	3	900.802	2699.39	NaN	NaN	NaN	0.037317	3.36e-05	NaN	NaN	NaN	NaN	105.96	0.68732	107.69	107.46	108.15	1.7324								0	0	0
doa10Δ(H)/WT(L) Rep1	SANLMAGHWVAISGAAGGLGSLAVQYAK	28	1	Unmodified	_SANLMAGHWVAISGAAGGLGSLAVQYAK_					0	0	0	0	P00330	P00330	P00330	ADH1	Alcohol dehydrogenase 1	ISO-MSMS	0	901.14	3	900.802	2699.39	NaN	NaN	NaN	-0.46178	-0.00041597	NaN	NaN	NaN	NaN	107.84	0.21523	109.48	109.4	109.61	1.6322								0	0	0
doa10Δ(H)/WT(L) Rep1	SANLMAGHWVAISGAAGGLGSLAVQYAK	28	1	Unmodified	_SANLMAGHWVAISGAAGGLGSLAVQYAK_					0	0	0	0	P00330	P00330	P00330	ADH1	Alcohol dehydrogenase 1	ISO-MSMS	0	901.14	3	900.802	2699.39	NaN	NaN	NaN	0.27098	0.0002441	NaN	NaN	NaN	NaN	108.85	0.39364	110.48	110.19	110.58	1.6322								0	0	0
doa10Δ(H)/WT(L) Rep1	SANLMAGHWVAISGAAGGLGSLAVQYAK	28	1	Unmodified	_SANLMAGHWVAISGAAGGLGSLAVQYAK_					0	0	0	0	P00330	P00330	P00330	ADH1	Alcohol dehydrogenase 1	ISO-MSMS	0	901.141	3	900.802	2699.39	NaN	NaN	NaN	-0.20565	-0.00018525	NaN	NaN	NaN	NaN	108.99	0.17457	110.62	110.54	110.71	1.6322								0	0	0
doa10Δ(H)/WT(L) Rep1	SANLMAGHWVAISGAAGGLGSLAVQYAK	28	1	Unmodified	_SANLMAGHWVAISGAAGGLGSLAVQYAK_					0	0	0	0	P00330	P00330	P00330	ADH1	Alcohol dehydrogenase 1	ISO-MSMS	1	903.776	3	900.802	2699.39	NaN	NaN	NaN	-0.10258	-9.24e-05	NaN	NaN	NaN	NaN	111.91	0.74702	112.44	112.14	112.89	0.5295								0	0	0
doa10Δ(H)/WT(L) Rep1	SANLMAGHWVAISGAAGGLGSLAVQYAK	28	1	Unmodified	_SANLMAGHWVAISGAAGGLGSLAVQYAK_					0	0	0	0	P00330	P00330	P00330	ADH1	Alcohol dehydrogenase 1	MSMS	1	903.477	3	900.802	2699.39	NaN	NaN	NaN	NaN	NaN	NaN	NaN	NaN	NaN	90.083	1	92.216	91.716	92.716	2.1332								0	0	0
doa10Δ(H)/WT(L) Rep1	SANLMAGHWVAISGAAGGLGSLAVQYAK	28	1	Unmodified	_SANLMAGHWVAISGAAGGLGSLAVQYAK_					0	0	0	0	P00330	P00330	P00330	ADH1	Alcohol dehydrogenase 1	MSMS	0	900.807	3	900.802	2699.39	NaN	NaN	NaN	NaN	NaN	NaN	NaN	NaN	NaN	100.33	1	102.37	101.87	102.87	2.0331								0	0	0
doa10Δ(H)/WT(L) Rep1	SANLMAGHWVAISGAAGGLGSLAVQYAK	28	1	Unmodified	_SANLMAGHWVAISGAAGGLGSLAVQYAK_					0	0	0	0	P00330	P00330	P00330	ADH1	Alcohol dehydrogenase 1	MSMS	1	903.143	3	900.802	2699.39	NaN	NaN	NaN	NaN	NaN	NaN	NaN	NaN	NaN	112	1	112.45	111.95	112.95	0.44789								0	0	0
doa10Δ(H)/WT(L) Rep1	SANLMAGHWVAISGAAGGLGSLAVQYAK	28	1	Unmodified	_SANLMAGHWVAISGAAGGLGSLAVQYAK_					0	0	0	0	P00330	P00330	P00330	ADH1	Alcohol dehydrogenase 1	MSMS	1	903.478	3	900.802	2699.39	NaN	NaN	NaN	NaN	NaN	NaN	NaN	NaN	NaN	113.19	1	113.62	113.12	114.12	0.42924								0	0	0
doa10Δ(H)/WT(L) Rep1	SANLMAGHWVAISGAAGGLGSLAVQYAK	28	1	Unmodified	_SANLMAGHWVAISGAAGGLGSLAVQYAK_					0	0	0	0	P00330	P00330	P00330	ADH1	Alcohol dehydrogenase 1	MULTI-SECPEP		903.812	3	900.802	2699.39	62833.8	5.1668	0.0046543	0.17171	0.00015467	5.3385	0.004809	901.137	903.808	98.306	0.36298	100.44	100.19	100.55	2.1334					301	37	12	0	0	0
doa10Δ(H)/WT(L) Rep1	SANLMAGHWVAISGAAGGLGSLAVQYAK	28	1	Unmodified	_SANLMAGHWVAISGAAGGLGSLAVQYAK_					0	0	0	0	P00330	P00330	P00330	ADH1	Alcohol dehydrogenase 1	MULTI-MATCH			3	900.802	2699.39	62552.2	5.435	0.0048959	-0.7645	-0.00068866	4.6705	0.0042072	901.137	904.142	95.769	0.27524	97.802	97.625	97.9	2.0331	0.077489	-0.00047033	NaN	181.77	206	29	10	NaN	NaN	NaN
doa10Δ(H)/WT(L) Rep1	SANLMAGHWVAISGAAGGLGSLAVQYAK	28	1	Unmodified	_SANLMAGHWVAISGAAGGLGSLAVQYAK_					0	0	0	0	P00330	P00330	P00330	ADH1	Alcohol dehydrogenase 1	MULTI-MATCH			3	900.802	2699.39	62606.8	5.2927	0.0047677	0.056278	5.07e-05	5.349	0.0048184	901.137	903.808	101.6	0.31708	103.63	103.56	103.88	2.0331	0.26698	0.0012592	NaN	105.63	219	32	10	NaN	NaN	NaN
doa10Δ(H)/WT(L) Rep1	SANLMAGHWVAISGAAGGLGSLAVQYAK	28	1	Unmodified	_SANLMAGHWVAISGAAGGLGSLAVQYAK_					0	0	0	0	P00330	P00330	P00330	ADH1	Alcohol dehydrogenase 1	MULTI-MATCH			3	900.802	2699.39	62602.7	5.1317	0.0046227	0.18544	0.00016704	5.3171	0.0047897	901.471	903.809	98.012	0.15887	100.15	100.05	100.21	2.1334	-1.1196	0.0013632	NaN	83.944	104	16	10	NaN	NaN	NaN
doa10Δ(H)/WT(L) Rep1	SANLMAGHWVAISGAAGGLGSLAVQYAK	28	1	Unmodified	_SANLMAGHWVAISGAAGGLGSLAVQYAK_					0	0	0	0	P00330	P00330	P00330	ADH1	Alcohol dehydrogenase 1	MULTI-MATCH			3	900.802	2699.39	62758.8	5.2487	0.004728	0.21166	0.00019067	5.4604	0.0049187	901.137	903.808	103.05	0.19308	104.98	104.88	105.08	1.9329	-0.30637	0.00075254	NaN	84.89	133	19	9	NaN	NaN	NaN
doa10Δ(H)/WT(L) Rep1	SANLMAGHWVAISGAAGGLGSLAVQYAK	28	1	Unmodified	_SANLMAGHWVAISGAAGGLGSLAVQYAK_					0	0	0	0	P00330	P00330	P00330	ADH1	Alcohol dehydrogenase 1	MULTI-MATCH			3	900.802	2699.39	56162.4	2.9992	0.0027017	1.0663	0.0009605	4.0655	0.0036622	901.137	903.808	118.31	0.053322	118.54	118.51	118.56	0.22875	-0.74272	0.00081277	NaN	15.554	13	6	4	NaN	NaN	NaN
doa10Δ(H)/WT(L) Rep1	SANLMAGHWVAISGAAGGLGSLAVQYAK	28	1	Unmodified	_SANLMAGHWVAISGAAGGLGSLAVQYAK_					0	0	0	0	P00330	P00330	P00330	ADH1	Alcohol dehydrogenase 1	MULTI-MATCH			3	900.802	2699.39	68471.3	2.9912	0.0026945	1.4789	0.0013322	4.4701	0.0040267	901.138	903.81	114.43	0.18188	114.76	114.64	114.82	0.32901	0.4615	0.0016282	NaN	41.047	58	21	7	NaN	NaN	NaN
doa10Δ(H)/WT(L) Rep1	SANLMAGHWVAISGAAGGLGSLAVQYAK	28	1	Unmodified	_SANLMAGHWVAISGAAGGLGSLAVQYAK_					0	0	0	0	P00330	P00330	P00330	ADH1	Alcohol dehydrogenase 1	MULTI-MATCH			4	675.854	2699.39	73322.3	5.3775	0.0036344	0.5219	0.00035273	5.8994	0.0039871	676.356	678.108	97.322	0.29163	99.455	99.321	99.612	2.1334	-0.33562	0.0019572	NaN	46.938	125	28	9	NaN	NaN	NaN
doa10Δ(H)/WT(L) Rep1	SANLMAGHWVAISGAAGGLGSLAVQYAK	28	1	Unmodified	_SANLMAGHWVAISGAAGGLGSLAVQYAK_					0	0	0	0	P00330	P00330	P00330	ADH1	Alcohol dehydrogenase 1	MULTI-MATCH			4	675.854	2699.39	76157.4	5.4851	0.0037071	-0.20677	-0.00013975	5.2783	0.0035674	676.104	678.359	95.537	0.24596	97.57	97.427	97.673	2.0331	0.53149	-0.0004404	NaN	62.069	84	25	7	NaN	NaN	NaN
doa10Δ(H)/WT(L) Rep1	SANLMAGHWVAISGAAGGLGSLAVQYAK	28	1	Unmodified	_SANLMAGHWVAISGAAGGLGSLAVQYAK_					0	0	0	0	P00330	P00330	P00330	ADH1	Alcohol dehydrogenase 1	MULTI-MATCH			4	675.854	2699.39	78392.9	5.4288	0.0036691	-0.082538	-5.58e-05	5.3463	0.0036133	676.104	677.857	97.114	0.14033	99.248	99.171	99.311	2.1334	-0.20232	-0.00010946	NaN	34.04	29	14	5	NaN	NaN	NaN
doa10Δ(H)/WT(L) Rep1	SANLMAGHWVAISGAAGGLGSLAVQYAK	28	1	Unmodified	_SANLMAGHWVAISGAAGGLGSLAVQYAK_					0	0	0	0	P00330	P00330	P00330	ADH1	Alcohol dehydrogenase 1	MULTI-MATCH			4	675.854	2699.39	72968.6	5.5297	0.0037373	0.35159	0.00023762	5.8813	0.0039749	676.105	678.108	94.499	0.27919	96.632	96.447	96.726	2.1332	0.10784	0.00090924	NaN	59.372	126	28	7	NaN	NaN	NaN
doa10Δ(H)/WT(L) Rep1	SANLMAGHWVAISGAAGGLGSLAVQYAK	28	1	Unmodified	_SANLMAGHWVAISGAAGGLGSLAVQYAK_					0	0	0	0	P00330	P00330	P00330	ADH1	Alcohol dehydrogenase 1	MULTI-MATCH			4	675.854	2699.39	74494.8	5.4838	0.0037062	0.4591	0.00031028	5.9429	0.0040165	676.105	678.108	95.328	0.27604	97.361	97.185	97.461	2.0331	-0.31387	0.0010905	NaN	44.6	83	28	7	NaN	NaN	NaN
doa10Δ(H)/WT(L) Rep1	SANLMAGHWVAISGAAGGLGSLAVQYAK	28	1	Unmodified	_SANLMAGHWVAISGAAGGLGSLAVQYAK_					0	0	0	0	P00330	P00330	P00330	ADH1	Alcohol dehydrogenase 1	MULTI-MATCH			4	675.854	2699.39	75256.7	5.5204	0.003731	0.34191	0.00023108	5.8624	0.0039621	676.104	678.108	94.613	0.17976	96.746	96.717	96.897	2.1332	0.032592	0.00069894	NaN	44.529	32	18	4	NaN	NaN	NaN
doa10Δ(H)/WT(L) Rep1	SANLMAGHWVAISGAAGGLGSLAVQYAK	28	1	Unmodified	_SANLMAGHWVAISGAAGGLGSLAVQYAK_					0	0	0	0	P00330	P00330	P00330	ADH1	Alcohol dehydrogenase 1	MULTI-MATCH			4	675.854	2699.39	73398.6	5.5005	0.0037175	0.76874	0.00051956	6.2692	0.0042371	676.105	678.108	95.032	0.38051	97.065	96.805	97.185	2.0331	-0.32029	0.0017778	NaN	34.488	181	39	8	NaN	NaN	NaN
doa10Δ(H)/WT(L) Rep1	SANLMAGHWVAISGAAGGLGSLAVQYAK	28	1	Unmodified	_SANLMAGHWVAISGAAGGLGSLAVQYAK_					0	0	0	0	P00330	P00330	P00330	ADH1	Alcohol dehydrogenase 1	MULTI-MATCH			4	675.854	2699.39	73385.7	5.7967	0.0039177	-0.32278	-0.00021815	5.4739	0.0036996	676.105	678.107	93.315	0.1122	95.448	95.401	95.513	2.1332	0.036387	-0.0012405	NaN	62.582	39	11	5	NaN	NaN	NaN
doa10Δ(H)/WT(L) Rep1	SANLMAGHWVAISGAAGGLGSLAVQYAK	28	1	Unmodified	_SANLMAGHWVAISGAAGGLGSLAVQYAK_					0	0	0	0	P00330	P00330	P00330	ADH1	Alcohol dehydrogenase 1	MULTI-MATCH			4	675.854	2699.39	77376	5.2935	0.0035776	-0.24956	-0.00016866	5.0439	0.003409	676.104	677.857	107.54	0.097565	109.18	109.12	109.22	1.6322	0.016621	-0.0010799	NaN	25.91	21	10	4	NaN	NaN	NaN
doa10Δ(H)/WT(L) Rep1	SANLMAGHWVAISGAAGGLGSLAVQYAK	28	1	Unmodified	_SANLMAGHWVAISGAAGGLGSLAVQYAK_					0	0	0	0	P00330	P00330	P00330	ADH1	Alcohol dehydrogenase 1	MULTI-MATCH			4	675.854	2699.39	72614.8	5.6554	0.0038222	0.19939	0.00013476	5.8548	0.003957	676.105	678.108	93.886	0.42916	96.02	95.813	96.242	2.1332	1.6707	-8.81e-06	NaN	85.185	139	43	6	NaN	NaN	NaN
doa10Δ(H)/WT(L) Rep1	SANLMAGHWVAISGAAGGLGSLAVQYAK	28	1	Unmodified	_SANLMAGHWVAISGAAGGLGSLAVQYAK_					0	0	0	0	P00330	P00330	P00330	ADH1	Alcohol dehydrogenase 1	MULTI-MATCH			4	675.854	2699.39	73005.6	5.5781	0.00377	-0.28559	-0.00019302	5.2925	0.0035769	676.105	678.107	94.267	0.28934	96.4	96.224	96.514	2.1332	0.42178	-0.0014855	NaN	54.855	157	29	10	NaN	NaN	NaN
doa10Δ(H)/WT(L) Rep1	SANLMAGHWVAISGAAGGLGSLAVQYAK	28	1	Unmodified	_SANLMAGHWVAISGAAGGLGSLAVQYAK_					0	0	0	0	P00330	P00330	P00330	ADH1	Alcohol dehydrogenase 1	MULTI-MATCH			4	675.854	2699.39	75626.3	5.3137	0.0035913	0.57366	0.00038771	5.8873	0.003979	676.105	678.108	103.04	0.14622	104.98	104.88	105.03	1.9329	-0.0078235	0.00078267	NaN	22.971	35	14	5	NaN	NaN	NaN
doa10Δ(H)/WT(L) Rep1	SANLMAGHWVAISGAAGGLGSLAVQYAK	28	1	Unmodified	_SANLMAGHWVAISGAAGGLGSLAVQYAK_					0	0	0	0	P00330	P00330	P00330	ADH1	Alcohol dehydrogenase 1	MULTI-MATCH			4	675.854	2699.39	73048.4	5.72	0.0038659	0.12909	8.72e-05	5.8491	0.0039531	676.105	677.857	93.607	0.33987	95.74	95.619	95.959	2.1332	0.77233	-0.00057359	NaN	93.392	134	34	9	NaN	NaN	NaN
doa10Δ(H)/WT(L) Rep1	SANLMAGHWVAISGAAGGLGSLAVQYAK	28	1	Unmodified	_SANLMAGHWVAISGAAGGLGSLAVQYAK_					0	0	0	0	P00330	P00330	P00330	ADH1	Alcohol dehydrogenase 1	MULTI-MATCH			4	675.854	2699.39	76787.1	5.2244	0.0035309	-0.49856	-0.00033695	4.7258	0.0031939	676.104	677.857	106.38	0.089386	108.11	108.06	108.15	1.7324	-0.049306	-0.0024324	NaN	22.695	22	9	5	NaN	NaN	NaN
doa10Δ(H)/WT(L) Rep1	SANLMAGHWVAISGAAGGLGSLAVQYAK	28	1	Unmodified	_SANLMAGHWVAISGAAGGLGSLAVQYAK_					0	0	0	0	P00330	P00330	P00330	ADH1	Alcohol dehydrogenase 1	MULTI-MATCH			4	675.854	2699.39	72953.8	5.368	0.003628	0.26564	0.00017953	5.6337	0.0038075	676.104	678.36	99.218	0.21957	101.35	101.26	101.48	2.1334	-0.047258	-0.00040673	NaN	56.783	66	22	6	NaN	NaN	NaN
doa10Δ(H)/WT(L) Rep1	SANLMAGHWVAISGAAGGLGSLAVQYAK	28	1	Unmodified	_SANLMAGHWVAISGAAGGLGSLAVQYAK_					0	0	0	0	P00330	P00330	P00330	ADH1	Alcohol dehydrogenase 1	MULTI-MATCH			4	675.854	2699.39	76157.4	5.358	0.0036212	0.69761	0.00047148	6.0556	0.0040927	676.105	678.359	102.26	0.27556	104.3	104.16	104.43	2.0331	0.084639	0.0006249	NaN	20.711	108	28	7	NaN	NaN	NaN
doa10Δ(H)/WT(L) Rep1	SANLMAGHWVAISGAAGGLGSLAVQYAK	28	1	Unmodified	_SANLMAGHWVAISGAAGGLGSLAVQYAK_					0	0	0	0	P00330	P00330	P00330	ADH1	Alcohol dehydrogenase 1	MULTI-MATCH			4	675.854	2699.39	74269.3	4.4017	0.0029749	0.85249	0.00057616	5.2541	0.003551	676.105	678.109	111.05	0.29099	111.58	111.38	111.67	0.5295	0.22174	0.00060179	NaN	40.519	77	30	4	NaN	NaN	NaN
doa10Δ(H)/WT(L) Rep1	SANLMAGHWVAISGAAGGLGSLAVQYAK	28	1	Unmodified	_SANLMAGHWVAISGAAGGLGSLAVQYAK_					0	0	0	0	P00330	P00330	P00330	ADH1	Alcohol dehydrogenase 1	MULTI-MATCH			4	675.854	2699.39	76285.2	5.1911	0.0035084	1.382	0.00093403	6.5731	0.0044424	676.105	677.858	104.37	0.29651	106.3	106.15	106.44	1.9329	0.11497	0.0020213	NaN	25.91	81	30	5	NaN	NaN	NaN
doa10Δ(H)/WT(L) Rep1	SANLMAGHWVAISGAAGGLGSLAVQYAK	28	1	Unmodified	_SANLMAGHWVAISGAAGGLGSLAVQYAK_					0	0	0	0	P00330	P00330	P00330	ADH1	Alcohol dehydrogenase 1	MULTI-MATCH			4	675.854	2699.39	78977.1	4.7576	0.0032154	1.1297	0.00076348	5.8873	0.0039789	676.357	678.108	110.59	0.16343	112.12	112.01	112.17	1.5319	-0.099801	0.0011162	NaN	40.625	26	17	4	NaN	NaN	NaN
doa10Δ(H)/WT(L) Rep1	SANLMAGHWVAISGAAGGLGSLAVQYAK	28	1	Unmodified	_SANLMAGHWVAISGAAGGLGSLAVQYAK_					0	0	0	0	P00330	P00330	P00330	ADH1	Alcohol dehydrogenase 1	MULTI-MATCH			4	675.854	2699.39	72012	5.3768	0.0036339	2.4806	0.0016765	7.8573	0.0053104	676.107	678.111	99.429	0.16962	101.56	101.46	101.63	2.1334	-0.11891	0.0041071	NaN	18.537	41	18	5	NaN	NaN	NaN
doa10Δ(H)/WT(L) Rep1	SANLMAGHWVAISGAAGGLGSLAVQYAK	28	1	Unmodified	_SANLMAGHWVAISGAAGGLGSLAVQYAK_					0	0	0	0	P00330	P00330	P00330	ADH1	Alcohol dehydrogenase 1	MULTI-MATCH			4	675.854	2699.39	72886.5	5.3535	0.0036182	0.51194	0.000346	5.8655	0.0039642	676.105	678.108	100.19	0.19449	102.23	102.08	102.28	2.0331	-0.29303	-0.0022149	NaN	32.962	65	21	7	NaN	NaN	NaN
doa10Δ(H)/WT(L) Rep1	SIGGEVFIDFTK	12	1	Unmodified	_SIGGEVFIDFTK_					0	0	0	0	P00330	P00330	P00330	ADH1	Alcohol dehydrogenase 1	MULTI-MSMS		656.846	2	656.843	1311.67	72515.8	5.7473	0.0037751	-0.51407	-0.00033766	5.2333	0.0034374	656.842	660.849	81.302	1.6351	83.535	82.863	84.498	2.2335					959	178	7	0	0	0
doa10Δ(H)/WT(L) Rep1	SIGGEVFIDFTKEK	14	2	Unmodified	_SIGGEVFIDFTKEK_					0	0	0	1	P00330	P00330	P00330	ADH1	Alcohol dehydrogenase 1	MULTI-MSMS		529.289	3	523.943	1568.81	81149.6	5.6612	0.0029661	0.020191	1.06e-05	5.6814	0.0029767	523.944	529.286	72.247	0.93626	74.38	73.995	74.931	2.1334					287	104	5	0	0	0
doa10Δ(H)/WT(L) Rep1	VLGIDGGEGKEELFR	15	1	Unmodified	_VLGIDGGEGKEELFR_					0	0	0	1	P00330	P00330	P00330	ADH1	Alcohol dehydrogenase 1	MULTI-MSMS		543.294	3	540.286	1617.84	81110.1	5.7041	0.0030818	0.32769	0.00017704	6.0318	0.0032589	540.286	542.958	61.749	0.6789	63.883	63.452	64.131	2.1335					278	71	6	0	0	0
doa10Δ(H)/WT(L) Rep1	VVGLSTLPEIYEK	13	1	Unmodified	_VVGLSTLPEIYEK_					0	0	0	0	P00330	P00330	P00330	ADH1	Alcohol dehydrogenase 1	MULTI-MSMS		728.417	2	724.406	1446.8	71603.3	6.1735	0.0044721	-0.23646	-0.00017129	5.937	0.0043008	724.406	728.413	73.142	0.87572	75.376	74.955	75.831	2.2335					674	94	10	0	0	0
doa10Δ(H)/WT(L) Rep1	YSGVCHTDLHAWHGDWPLPVK	21	1	Unmodified	_YSGVCHTDLHAWHGDWPLPVK_					0	0	0	0	P00330	P00330	P00330	ADH1	Alcohol dehydrogenase 1	MULTI-MSMS		621.805	4	619.547	2474.16	75512.2	5.3355	0.0033056	0.13386	8.29e-05	5.4694	0.0033885	619.798	621.801	65.35	0.51054	67.483	67.026	67.536	2.1334					327	54	10	0	0	0
doa10Δ(H)/WT(L) Rep1	YSGVCHTDLHAWHGDWPLPVK	21	1	Unmodified	_YSGVCHTDLHAWHGDWPLPVK_					0	0	0	0	P00330	P00330	P00330	ADH1	Alcohol dehydrogenase 1	MULTI-MSMS		496.043	5	495.839	2474.16	84611.2	5.4101	0.0026826	0.73111	0.00036251	6.1412	0.0030451	496.04	497.843	65.359	0.51054	67.493	67.026	67.536	2.1334					377	54	11	0	0	0
doa10Δ(H)/WT(L) Rep1	YSGVCHTDLHAWHGDWPLPVK	21	1	Unmodified	_YSGVCHTDLHAWHGDWPLPVK_					0	0	0	0	P00330	P00330	P00330	ADH1	Alcohol dehydrogenase 1	MULTI-MSMS		619.801	4	619.547	2474.16	72997.7	5.0943	0.0031562	-1.6009	-0.00099182	3.4935	0.0021644	619.797	621.8	65.776	0.22473	67.909	67.757	67.982	2.1334					98	27	7	0	0	0
doa10Δ(H)/WT(L) Rep1	YSGVCHTDLHAWHGDWPLPVK	21	1	Unmodified	_YSGVCHTDLHAWHGDWPLPVK_					0	0	0	0	P00330	P00330	P00330	ADH1	Alcohol dehydrogenase 1	MULTI-MSMS		620.051	4	619.547	2474.16	75873.1	4.9818	0.0030864	-0.31978	-0.00019812	4.662	0.0028883	619.798	621.801	66.077	0.40176	68.21	67.998	68.399	2.1334					175	48	6	0	0	0
doa10Δ(H)/WT(L) Rep1	YSGVCHTDLHAWHGDWPLPVK	21	1	Unmodified	_YSGVCHTDLHAWHGDWPLPVK_					0	0	0	0	P00330	P00330	P00330	ADH1	Alcohol dehydrogenase 1	ISO-MSMS	0	619.8	4	619.547	2474.16	NaN	NaN	NaN	-0.72622	-0.00044993	NaN	NaN	NaN	NaN	65.458	0.071747	67.592	67.567	67.639	2.1334								0	0	0
doa10Δ(H)/WT(L) Rep1	YSGVCHTDLHAWHGDWPLPVK	21	1	Unmodified	_YSGVCHTDLHAWHGDWPLPVK_					0	0	0	0	P00330	P00330	P00330	ADH1	Alcohol dehydrogenase 1	ISO-MSMS	1	621.804	4	619.547	2474.16	NaN	NaN	NaN	-1.264	-0.00078314	NaN	NaN	NaN	NaN	65.977	0.064972	68.11	68.075	68.14	2.1334								0	0	0
doa10Δ(H)/WT(L) Rep1	YSGVCHTDLHAWHGDWPLPVK	21	1	Unmodified	_YSGVCHTDLHAWHGDWPLPVK_					0	0	0	0	P00330	P00330	P00330	ADH1	Alcohol dehydrogenase 1	MULTI-MATCH			4	619.547	2474.16	74351.5	5.1837	0.0032115	-1.2701	-0.00078691	3.9135	0.0024246	619.797	621.8	65.576	0.086487	67.71	67.655	67.741	2.1334	0.053599	-0.00080439	NaN	69.422	24	10	6	NaN	NaN	NaN
doa10Δ(H)/WT(L) Rep1	YSGVCHTDLHAWHGDWPLPVK	21	1	Unmodified	_YSGVCHTDLHAWHGDWPLPVK_					0	0	0	0	P00330	P00330	P00330	ADH1	Alcohol dehydrogenase 1	MULTI-MATCH			4	619.547	2474.16	75640.4	5.3122	0.0032911	0.74619	0.0004623	6.0583	0.0037534	619.798	621.802	67.073	0.32439	69.207	69.012	69.336	2.1334	1.0762	0.0019477	NaN	55.688	181	32	11	NaN	NaN	NaN
doa10Δ(H)/WT(L) Rep1	YSGVCHTDLHAWHGDWPLPVK	21	1	Unmodified	_YSGVCHTDLHAWHGDWPLPVK_					0	0	0	0	P00330	P00330	P00330	ADH1	Alcohol dehydrogenase 1	MULTI-MATCH			4	619.547	2474.16	75640.3	5.2833	0.0032733	0.54797	0.00033949	5.8313	0.0036128	619.798	622.054	66.628	0.4052	68.762	68.543	68.949	2.1334	0.26982	0.0013022	NaN	76.068	151	43	7	NaN	NaN	NaN
doa10Δ(H)/WT(L) Rep1	YSGVCHTDLHAWHGDWPLPVK	21	1	Unmodified	_YSGVCHTDLHAWHGDWPLPVK_					0	0	0	0	P00330	P00330	P00330	ADH1	Alcohol dehydrogenase 1	MULTI-MATCH			5	495.839	2474.16	83588.4	5.2665	0.0026113	-0.062825	-3.12e-05	5.2036	0.0025802	496.04	497.642	65.566	0.063446	67.7	67.678	67.741	2.1334	-0.27394	-0.000427	NaN	53.554	30	7	7	NaN	NaN	NaN
doa10Δ(H)/WT(L) Rep1	YSGVCHTDLHAWHGDWPLPVK	21	1	Unmodified	_YSGVCHTDLHAWHGDWPLPVK_					0	0	0	0	P00330	P00330	P00330	ADH1	Alcohol dehydrogenase 1	MULTI-MATCH			5	495.839	2474.16	84144.4	5.3784	0.0026668	0.146	7.24e-05	5.5244	0.0027392	496.04	497.643	66.789	0.41183	68.922	68.83	69.242	2.1334	0.15121	-0.00021146	NaN	52.814	121	42	5	NaN	NaN	NaN
doa10Δ(H)/WT(L) Rep1	YSGVCHTDLHAWHGDWPLPVK	21	1	Unmodified	_YSGVCHTDLHAWHGDWPLPVK_					0	0	0	0	P00330	P00330	P00330	ADH1	Alcohol dehydrogenase 1	MULTI-MATCH			5	495.839	2474.16	84539.8	5.0757	0.0025167	0.33712	0.00016715	5.4128	0.0026839	495.84	497.643	66.099	0.48187	68.232	68.115	68.597	2.1334	0.052542	2.16e-05	NaN	55.688	202	55	8	NaN	NaN	NaN
doa10Δ(H)/WT(L) Rep1	YSGVCHTDLHAWHGDWPLPVK	21	1	Unmodified	_YSGVCHTDLHAWHGDWPLPVK_					0	0	0	0	P00330	P00330	P00330	ADH1	Alcohol dehydrogenase 1	MULTI-MATCH			5	495.839	2474.16	84662.4	5.3874	0.0026713	0.028227	1.4e-05	5.4156	0.0026853	496.04	497.643	67.209	0.47108	69.342	69.057	69.528	2.1334	-0.14515	-0.00078877	NaN	49.036	148	47	7	NaN	NaN	NaN
doa10Δ(H)/WT(L) Rep1	YSGVCHTDLHAWHGDWPLPVK	21	1	Unmodified	_YSGVCHTDLHAWHGDWPLPVK_					0	0	0	0	P00330	P00330	P00330	ADH1	Alcohol dehydrogenase 1	MULTI-MATCH			5	495.839	2474.16	84539.8	5.2364	0.0025964	0.48119	0.00023859	5.7176	0.002835	496.04	497.643	66.351	0.49406	68.484	68.382	68.876	2.1334	0.85834	0.00022267	NaN	44.238	129	53	4	NaN	NaN	NaN
doa10Δ(H)/WT(L) Rep1	YSGVCHTDLHAWHGDWPLPVK	21	1	Unmodified	_YSGVCHTDLHAWHGDWPLPVK_					0	0	0	0	P00330	P00330	P00330	ADH1	Alcohol dehydrogenase 1	MULTI-MATCH			5	495.839	2474.16	84342.2	5.3907	0.0026729	0.10412	5.16e-05	5.4948	0.0027245	496.04	497.442	67.493	0.27643	69.627	69.49	69.766	2.1334	0.91378	-0.00075587	NaN	42.679	98	28	6	NaN	NaN	NaN
doa10Δ(H)/WT(L) Rep1	IGDYAGIK	8	1	Unmodified	_IGDYAGIK_					0	0	0	0	P00330;P00331	P00330	P00330	ADH1;ADH2	Alcohol dehydrogenase 1;Alcohol dehydrogenase 2	MULTI-MSMS		418.732	2	418.729	835.444	92604.3	5.3907	0.0022572	-0.052597	-2.2e-05	5.3381	0.0022352	418.729	422.736	32.708	0.56187	34.741	34.505	35.067	2.0331					283	63	7	0	0	0
doa10Δ(H)/WT(L) Rep1	LPLVGGHEGAGVVVGMGENVK	21	1	Unmodified	_LPLVGGHEGAGVVVGMGENVK_					0	0	0	0	P00330;P00331	P00330	P00330	ADH1;ADH2	Alcohol dehydrogenase 1;Alcohol dehydrogenase 2	MULTI-MSMS		674.033	3	673.695	2018.06	73333.7	5.6374	0.0037979	0.29842	0.00020104	5.9358	0.0039989	674.029	676.366	62.285	1.1986	64.519	63.714	64.913	2.2336					257	123	5	0	0	0
doa10Δ(H)/WT(L) Rep1	SIPETQK	7	1	Acetyl (Protein N-term)	_(ac)SIPETQK_					1	0	0	0	P00330;P00331	P00330	P00330	ADH1;ADH2	Alcohol dehydrogenase 1;Alcohol dehydrogenase 2	MULTI-MSMS		422.726	2	422.724	843.434	92277.4	5.1879	0.0021931	-0.35208	-0.00014883	4.8359	0.0020442	422.724	426.731	28.308	0.58101	30.241	30.009	30.59	1.9329					385	64	8	0	0	0
doa10Δ(H)/WT(L) Rep1	SIPETQK	7	1	Acetyl (Protein N-term)	_(ac)SIPETQK_					1	0	0	0	P00330;P00331	P00330	P00330	ADH1;ADH2	Alcohol dehydrogenase 1;Alcohol dehydrogenase 2	MULTI-MATCH			1	844.441	843.434	66103.5	5.2952	0.0044715	0.16291	0.00013757	5.4581	0.004609	844.441	852.455	28.299	0.56519	30.232	30.016	30.582	1.9329	0.16691	-0.00032215	NaN	94.662	288	62	6	NaN	NaN	NaN
doa10Δ(H)/WT(L) Rep1	SISIVGSYVGNR	12	0	Unmodified	_SISIVGSYVGNR_					0	0	0	0	P00330;P00331	P00330	P00330	ADH1;ADH2	Alcohol dehydrogenase 1;Alcohol dehydrogenase 2	ISO-MSMS	-1	626.342	2	626.338	1250.66	NaN	NaN	NaN	0.029062	1.82e-05	NaN	NaN	NaN	NaN	55.407	1.3501	57.44	57.013	58.364	2.0333								0	0	0
doa10Δ(H)/WT(L) Rep1	SISIVGSYVGNR	12	0	Unmodified	_SISIVGSYVGNR_					0	0	0	0	P00330;P00331	P00330	P00330	ADH1;ADH2	Alcohol dehydrogenase 1;Alcohol dehydrogenase 2	ISO-MSMS	-1	626.342	2	626.338	1250.66	NaN	NaN	NaN	0.55169	0.00034554	NaN	NaN	NaN	NaN	56.556	0.76352	58.589	58.364	59.127	2.0333								0	0	0
doa10Δ(H)/WT(L) Rep1	SISIVGSYVGNR	12	0	Unmodified	_SISIVGSYVGNR_					0	0	0	0	P00330;P00331	P00330	P00330	ADH1;ADH2	Alcohol dehydrogenase 1;Alcohol dehydrogenase 2	ISO-MSMS	-1	626.342	2	626.338	1250.66	NaN	NaN	NaN	0.64081	0.00040136	NaN	NaN	NaN	NaN	57.727	0.60249	59.76	59.538	60.14	2.0333								0	0	0
doa10Δ(H)/WT(L) Rep1	SISIVGSYVGNR	12	0	Unmodified	_SISIVGSYVGNR_					0	0	0	0	P00330;P00331	P00330	P00330	ADH1;ADH2	Alcohol dehydrogenase 1;Alcohol dehydrogenase 2	ISO-MSMS	-1	626.342	2	626.338	1250.66	NaN	NaN	NaN	0.87573	0.0005485	NaN	NaN	NaN	NaN	58.737	0.41821	60.77	60.588	61.006	2.0333								0	0	0
doa10Δ(H)/WT(L) Rep1	SISIVGSYVGNR	12	0	Unmodified	_SISIVGSYVGNR_					0	0	0	0	P00330;P00331	P00330	P00330	ADH1;ADH2	Alcohol dehydrogenase 1;Alcohol dehydrogenase 2	ISO-MSMS	-1	626.341	2	626.338	1250.66	NaN	NaN	NaN	0.38256	0.00023961	NaN	NaN	NaN	NaN	60.435	0.62078	62.569	62.273	62.893	2.1335								0	0	0
doa10Δ(H)/WT(L) Rep1	SISIVGSYVGNR	12	0	Unmodified	_SISIVGSYVGNR_					0	0	0	0	P00330;P00331	P00330	P00330	ADH1;ADH2	Alcohol dehydrogenase 1;Alcohol dehydrogenase 2	ISO-MSMS	-1	626.844	2	626.338	1250.66	NaN	NaN	NaN	0.73205	0.00045851	NaN	NaN	NaN	NaN	60.785	0.17912	62.919	62.884	63.063	2.1335								0	0	0
doa10Δ(H)/WT(L) Rep1	SISIVGSYVGNR	12	0	Unmodified	_SISIVGSYVGNR_					0	0	0	0	P00330;P00331	P00330	P00330	ADH1;ADH2	Alcohol dehydrogenase 1;Alcohol dehydrogenase 2	ISO-MSMS	-1	626.341	2	626.338	1250.66	NaN	NaN	NaN	0.4316	0.00027033	NaN	NaN	NaN	NaN	63.865	0.39996	65.999	65.711	66.111	2.1334								0	0	0
doa10Δ(H)/WT(L) Rep1	SISIVGSYVGNR	12	0	Unmodified	_SISIVGSYVGNR_					0	0	0	0	P00330;P00331	P00330	P00330	ADH1;ADH2	Alcohol dehydrogenase 1;Alcohol dehydrogenase 2	ISO-MSMS	-1	626.342	2	626.338	1250.66	NaN	NaN	NaN	-0.19653	-0.0001231	NaN	NaN	NaN	NaN	63.968	0.22376	66.101	66.031	66.255	2.1334								0	0	0
doa10Δ(H)/WT(L) Rep1	SISIVGSYVGNR	12	0	Unmodified	_SISIVGSYVGNR_					0	0	0	0	P00330;P00331	P00330	P00330	ADH1;ADH2	Alcohol dehydrogenase 1;Alcohol dehydrogenase 2	MSMS	-1	626.341	2	626.338	1250.66	NaN	NaN	NaN	NaN	NaN	NaN	NaN	NaN	NaN	57.194	1	59.228	58.728	59.728	2.0333								0	0	0
doa10Δ(H)/WT(L) Rep1	YVVDTSK	7	1	Unmodified	_YVVDTSK_					0	0	0	0	P00330;P00331	P00330	P00330	ADH1;ADH2	Alcohol dehydrogenase 1;Alcohol dehydrogenase 2	MULTI-MSMS		406.216	2	406.213	810.412	94051.7	5.3829	0.0021866	-0.067049	-2.72e-05	5.3158	0.0021594	406.213	410.22	18.691	0.81998	20.022	19.625	20.445	1.3316					383	93	8	0	0	0
doa10Δ(H)/WT(L) Rep1	YVVDTSK	7	1	Unmodified	_YVVDTSK_					0	0	0	0	P00330;P00331	P00330	P00330	ADH1;ADH2	Alcohol dehydrogenase 1;Alcohol dehydrogenase 2	MULTI-MATCH			1	811.42	810.412	65152.3	5.8692	0.0047624	0.25177	0.00020429	6.121	0.0049667	811.42	819.434	18.653	0.19772	19.984	19.81	20.008	1.3316	-0.01625	2.63e-05	NaN	134.06	64	24	4	NaN	NaN	NaN
doa10Δ(H)/WT(L) Rep1	EALDFFAR	8	0	Unmodified	_EALDFFAR_					0	0	0	0	P00330;P00331;P38113	P00330;P38113	P00330	ADH1;ADH2;ADH5	Alcohol dehydrogenase 1;Alcohol dehydrogenase 2;Alcohol dehydrogenase 5	ISO-MSMS	-1	484.747	2	484.745	967.476	NaN	NaN	NaN	-0.31953	-0.00015489	NaN	NaN	NaN	NaN	69.999	0.72239	72.132	71.834	72.557	2.1334								0	0	0
doa10Δ(H)/WT(L) Rep1	AVSISYSALGSIK	13	1	Unmodified	_AVSISYSALGSIK_					0	0	0	0	Q04894	Q04894	Q04894	ADH6	NADP-dependent alcohol dehydrogenase 6	ISO-MSMS	1	652.375	2	648.364	1294.71	NaN	NaN	NaN	0.058854	3.82e-05	NaN	NaN	NaN	NaN	63.944	0.74057	66.077	65.683	66.423	2.1334								0	0	0
doa10Δ(H)/WT(L) Rep1	VGIVGLGGIGSMGTLISK	18	1	Unmodified	_VGIVGLGGIGSMGTLISK_					0	0	0	0	Q04894	Q04894	Q04894	ADH6	NADP-dependent alcohol dehydrogenase 6	MULTI-MSMS		829.985	2	829.979	1657.94	67094.9	5.7541	0.0047758	-0.20687	-0.0001717	5.5473	0.0046041	829.979	833.986	90.523	0.60926	92.656	92.392	93.001	2.1332					209	64	5	0	0	0
doa10Δ(H)/WT(L) Rep1	EQGTPLEKAIELK	13	2	GlyGly (K)	_EQGTPLEK(gl)AIELK_					0	1	0	1	P07170	P07170	P07170	ADK1	Adenylate kinase	MULTI-MATCH			3	523.954	1568.84	81450.3	5.268	0.0027602	-0.11687	-6.12e-05	5.1511	0.0026989	524.289	529.297	56.877	0.97401	58.911	58.267	59.241	2.0333	-0.14093	-0.00040014	NaN	49.333	279	99	5	NaN	NaN	NaN
doa10Δ(H)/WT(L) Rep1	GTQAPNLQER	10	0	Unmodified	_GTQAPNLQER_					0	0	0	0	P07170	P07170	P07170	ADK1	Adenylate kinase	ISO-MSMS	-1	557.289	2	557.286	1112.56	NaN	NaN	NaN	-0.039399	-2.2e-05	NaN	NaN	NaN	NaN	22.05	0.43908	23.782	23.581	24.02	1.7324								0	0	0
doa10Δ(H)/WT(L) Rep1	GTQLGLEAK	9	1	Unmodified	_GTQLGLEAK_					0	0	0	0	P07170	P07170	P07170	ADK1	Adenylate kinase	MULTI-MSMS		462.768	2	458.759	915.503	88903.9	5.3522	0.0024553	0.20809	9.55e-05	5.5602	0.0025508	458.758	462.766	27.762	0.59544	29.695	29.345	29.94	1.9329					297	62	7	0	0	0
doa10Δ(H)/WT(L) Rep1	SQIAKGTQLGLEAK	14	2	GlyGly (K)	_SQIAK(gl)GTQLGLEAK_	SQIAK(0.978)GTQLGLEAK(0.022)		SQIAK(16.57)GTQLGLEAK(-16.57)		0	1	0	1	P07170	P07170	P07170	ADK1	Adenylate kinase	MULTI-MSMS		525.304	3	519.958	1556.85	83174.4	5.0693	0.0026358	0.53021	0.00027569	5.5995	0.0029115	520.292	525.301	33.669	0.78149	35.703	35.301	36.082	2.0331					405	80	9	0	0	0
doa10Δ(H)/WT(L) Rep1	SSSESIR	7	0	Acetyl (Protein N-term)	_(ac)SSSESIR_					1	0	0	0	P07170	P07170	P07170	ADK1	Adenylate kinase	ISO-MSMS	-1	404.198	2	404.196	806.377	NaN	NaN	NaN	-0.13674	-5.53e-05	NaN	NaN	NaN	NaN	18.106	0.46921	19.438	19.214	19.684	1.3316								0	0	0
doa10Δ(H)/WT(L) Rep1	TIPQAEKLDQMLK	13	2	Unmodified	_TIPQAEKLDQMLK_					0	0	0	1	P07170	P07170	P07170	ADK1	Adenylate kinase	MULTI-MSMS		505.616	3	505.613	1513.82	83965.4	5.4751	0.0027683	-0.37658	-0.0001904	5.0985	0.0025779	505.613	510.956	57.697	0.861	59.73	59.314	60.175	2.0333					466	90	8	0	0	0
doa10Δ(H)/WT(L) Rep1	ENSKPFVLNFSAPFIPHVFK	20	2	Unmodified	_ENSKPFVLNFSAPFIPHVFK_					0	0	0	1	P47143	P47143	P47143	ADO1	Adenosine kinase	MULTI-MSMS		779.097	3	773.416	2317.23	68434.3	5.7107	0.0044167	0.35903	0.00027768	6.0697	0.0046944	773.75	779.093	94.499	0.79078	96.632	96.206	96.996	2.1332					405	82	8	0	0	0
doa10Δ(H)/WT(L) Rep1	ENSKPFVLNFSAPFIPHVFK	20	2	Unmodified	_ENSKPFVLNFSAPFIPHVFK_					0	0	0	1	P47143	P47143	P47143	ADO1	Adenosine kinase	MULTI-MSMS		773.755	3	773.416	2317.23	68304.5	5.6747	0.0043889	0.33364	0.00025804	6.0083	0.0046469	773.75	779.093	95.022	0.71036	97.056	96.598	97.309	2.0331					441	74	10	0	0	0
doa10Δ(H)/WT(L) Rep1	ENSKPFVLNFSAPFIPHVFK	20	2	Unmodified	_ENSKPFVLNFSAPFIPHVFK_					0	0	0	1	P47143	P47143	P47143	ADO1	Adenosine kinase	MULTI-MSMS		580.568	4	580.314	2317.23	76921.8	5.4781	0.003179	-0.039647	-2.3e-05	5.4385	0.003156	580.565	584.571	94.987	0.65263	97.02	96.646	97.299	2.0331					563	68	14	0	0	0
doa10Δ(H)/WT(L) Rep1	ENSKPFVLNFSAPFIPHVFK	20	2	Unmodified	_ENSKPFVLNFSAPFIPHVFK_					0	0	0	1	P47143	P47143	P47143	ADO1	Adenosine kinase	MULTI-MSMS		580.568	4	580.314	2317.23	77040.9	5.4617	0.0031695	0.24249	0.00014072	5.7041	0.0033102	580.565	584.572	95.318	0.74364	97.351	97.203	97.947	2.0331					580	78	14	0	0	0
doa10Δ(H)/WT(L) Rep1	ENSKPFVLNFSAPFIPHVFK	20	2	Unmodified	_ENSKPFVLNFSAPFIPHVFK_					0	0	0	1	P47143	P47143	P47143	ADO1	Adenosine kinase	MULTI-MSMS		773.755	3	773.416	2317.23	68186.8	5.6456	0.0043664	0.31862	0.00024643	5.9642	0.0046128	773.75	779.093	95.318	0.51711	97.351	97.203	97.72	2.0331					260	53	7	0	0	0
doa10Δ(H)/WT(L) Rep1	ENSKPFVLNFSAPFIPHVFK	20	2	Unmodified	_ENSKPFVLNFSAPFIPHVFK_					0	0	0	1	P47143	P47143	P47143	ADO1	Adenosine kinase	MULTI-MSMS		584.574	4	580.314	2317.23	77040.8	5.5093	0.0031971	0.026663	1.55e-05	5.536	0.0032126	580.565	584.571	95.957	0.77231	97.99	97.874	98.646	2.0331					529	81	11	0	0	0
doa10Δ(H)/WT(L) Rep1	ENSKPFVLNFSAPFIPHVFK	20	2	Unmodified	_ENSKPFVLNFSAPFIPHVFK_					0	0	0	1	P47143	P47143	P47143	ADO1	Adenosine kinase	MULTI-MSMS		584.324	4	580.314	2317.23	77157.5	5.4937	0.0031881	0.98988	0.00057444	6.4836	0.0037625	580.565	584.572	96.774	0.42517	98.907	98.842	99.267	2.1334					125	44	6	0	0	0
doa10Δ(H)/WT(L) Rep1	ENSKPFVLNFSAPFIPHVFK	20	2	Unmodified	_ENSKPFVLNFSAPFIPHVFK_					0	0	0	1	P47143	P47143	P47143	ADO1	Adenosine kinase	MULTI-MSMS		584.574	4	580.314	2317.23	77516.7	5.3875	0.0031264	0.4354	0.00025267	5.8229	0.0033791	580.565	584.321	97.212	0.25134	99.346	99.258	99.509	2.1334					70	25	5	0	0	0
doa10Δ(H)/WT(L) Rep1	ENSKPFVLNFSAPFIPHVFK	20	2	Unmodified	_ENSKPFVLNFSAPFIPHVFK_					0	0	0	1	P47143	P47143	P47143	ADO1	Adenosine kinase	ISO-MSMS	1	584.575	4	580.314	2317.23	NaN	NaN	NaN	-0.21382	-0.00012408	NaN	NaN	NaN	NaN	94.502	1.0481	96.635	95.948	96.996	2.1332								0	0	0
doa10Δ(H)/WT(L) Rep1	ENSKPFVLNFSAPFIPHVFK	20	2	Unmodified	_ENSKPFVLNFSAPFIPHVFK_					0	0	0	1	P47143	P47143	P47143	ADO1	Adenosine kinase	MULTI-MATCH			3	773.416	2317.23	68186.8	5.6721	0.0043869	-0.0059125	-4.57e-06	5.6662	0.0043823	773.416	779.093	95.766	0.46938	97.799	97.673	98.142	2.0331	0.30815	-8.42e-05	NaN	132.62	111	50	5	NaN	NaN	NaN
doa10Δ(H)/WT(L) Rep1	ENSKPFVLNFSAPFIPHVFK	20	2	Unmodified	_ENSKPFVLNFSAPFIPHVFK_					0	0	0	1	P47143	P47143	P47143	ADO1	Adenosine kinase	MULTI-MATCH			4	580.314	2317.23	77081.5	5.5357	0.0032125	0.9897	0.00057434	6.5254	0.0037868	580.565	584.572	96.649	0.12248	98.783	98.728	98.851	2.1334	0.35975	0.001265	NaN	72.359	71	12	9	NaN	NaN	NaN
doa10Δ(H)/WT(L) Rep1	ENSKPFVLNFSAPFIPHVFKDALAR	25	2	Unmodified	_ENSKPFVLNFSAPFIPHVFKDALAR_					0	0	0	2	P47143	P47143	P47143	ADO1	Adenosine kinase	MULTI-MSMS		715.896	4	711.885	2843.51	72451.9	5.5955	0.0039833	1.0816	0.00076995	6.6771	0.0047533	712.137	716.144	95.769	0.20796	97.802	97.692	97.9	2.0331					139	22	10	0	0	0
doa10Δ(H)/WT(L) Rep1	ENSKPFVLNFSAPFIPHVFKDALAR	25	2	Unmodified	_ENSKPFVLNFSAPFIPHVFKDALAR_					0	0	0	2	P47143	P47143	P47143	ADO1	Adenosine kinase	MULTI-MSMS		716.147	4	711.885	2843.51	72306.5	5.6158	0.0039978	0.30658	0.00021825	5.9224	0.0042161	712.136	716.143	96.06	0.40373	98.093	97.956	98.36	2.0331					124	42	7	0	0	0
doa10Δ(H)/WT(L) Rep1	ENSKPFVLNFSAPFIPHVFKDALAR	25	2	Unmodified	_ENSKPFVLNFSAPFIPHVFKDALAR_					0	0	0	2	P47143	P47143	P47143	ADO1	Adenosine kinase	MULTI-SECPEP		573.319	5	569.71	2843.51	77961.8	5.4833	0.0031239	0.01034	5.89e-06	5.4936	0.0031298	569.91	572.915	96.075	0.58475	98.109	97.891	98.476	2.0331					105	61	4	0	0	0
doa10Δ(H)/WT(L) Rep1	ENSKPFVLNFSAPFIPHVFKDALAR	25	2	Unmodified	_ENSKPFVLNFSAPFIPHVFKDALAR_					0	0	0	2	P47143	P47143	P47143	ADO1	Adenosine kinase	MULTI-MATCH			4	711.885	2843.51	74290.1	5.6297	0.0040077	0.68827	0.00048997	6.3179	0.0044976	712.136	715.893	96.413	0.32497	98.546	98.431	98.756	2.1334	-0.072202	0.00013261	NaN	31.378	136	33	7	NaN	NaN	NaN
doa10Δ(H)/WT(L) Rep1	ENSKPFVLNFSAPFIPHVFKDALAR	25	2	Unmodified	_ENSKPFVLNFSAPFIPHVFKDALAR_					0	0	0	2	P47143	P47143	P47143	ADO1	Adenosine kinase	MULTI-MATCH			4	711.885	2843.51	72614.6	5.5698	0.0039651	0.79637	0.00056693	6.3662	0.004532	712.136	715.893	95.597	0.46561	97.63	97.318	97.783	2.0331	-0.27125	0.00041607	NaN	56.131	259	48	9	NaN	NaN	NaN
doa10Δ(H)/WT(L) Rep1	ENSKPFVLNFSAPFIPHVFKDALAR	25	2	Unmodified	_ENSKPFVLNFSAPFIPHVFKDALAR_					0	0	0	2	P47143	P47143	P47143	ADO1	Adenosine kinase	MULTI-MATCH			4	711.885	2843.51	71960	5.6126	0.0039955	0.73562	0.00052367	6.3482	0.0045192	712.388	716.394	95.928	0.17461	97.961	97.866	98.04	2.0331	-0.44822	0.00020483	NaN	56.131	67	18	7	NaN	NaN	NaN
doa10Δ(H)/WT(L) Rep1	ENSKPFVLNFSAPFIPHVFKDALAR	25	2	Unmodified	_ENSKPFVLNFSAPFIPHVFKDALAR_					0	0	0	2	P47143	P47143	P47143	ADO1	Adenosine kinase	MULTI-MATCH			5	569.71	2843.51	77961.8	5.4523	0.0031062	0.70052	0.0003991	6.1528	0.0035053	569.911	572.916	95.61	0.55618	97.644	97.326	97.882	2.0331	-0.018552	-0.0003068	NaN	57.152	220	58	6	NaN	NaN	NaN
doa10Δ(H)/WT(L) Rep1	ENSKPFVLNFSAPFIPHVFKDALAR	25	2	Unmodified	_ENSKPFVLNFSAPFIPHVFKDALAR_					0	0	0	2	P47143	P47143	P47143	ADO1	Adenosine kinase	MULTI-MATCH			5	569.71	2843.51	81375.9	5.5021	0.0031346	0.90627	0.00051631	6.4084	0.0036509	569.911	572.916	96.659	0.11369	98.792	98.728	98.842	2.1334	0.18497	6.56e-05	NaN	62.707	37	11	6	NaN	NaN	NaN
doa10Δ(H)/WT(L) Rep1	GAAYVLGAGQVVYFGSVGK	19	1	Unmodified	_GAAYVLGAGQVVYFGSVGK_					0	0	0	0	P47143	P47143	P47143	ADO1	Adenosine kinase	MULTI-MSMS		926.004	2	921.991	1841.97	63467.2	5.5439	0.0051114	0.49809	0.00045924	6.042	0.0055707	922.493	925.999	80.863	0.65446	83.096	82.751	83.405	2.2335					289	69	6	0	0	0
doa10Δ(H)/WT(L) Rep1	GAAYVLGAGQVVYFGSVGK	19	1	Unmodified	_GAAYVLGAGQVVYFGSVGK_					0	0	0	0	P47143	P47143	P47143	ADO1	Adenosine kinase	MULTI-MSMS		614.998	3	614.996	1841.97	78238.1	5.4205	0.0033336	0.65555	0.00040316	6.076	0.0037367	614.997	618.003	80.886	0.59217	83.12	82.694	83.286	2.2335					252	62	7	0	0	0
doa10Δ(H)/WT(L) Rep1	GAAYVLGAGQVVYFGSVGK	19	1	Unmodified	_GAAYVLGAGQVVYFGSVGK_					0	0	0	0	P47143	P47143	P47143	ADO1	Adenosine kinase	MULTI-MSMS		921.998	2	921.991	1841.97	63390.9	5.2709	0.0048597	-0.076093	-7.02e-05	5.1948	0.0047895	921.991	925.998	81.577	0.5984	83.81	83.746	84.344	2.2335					125	65	4	0	0	0
doa10Δ(H)/WT(L) Rep1	GAAYVLGAGQVVYFGSVGK	19	1	Unmodified	_GAAYVLGAGQVVYFGSVGK_					0	0	0	0	P47143	P47143	P47143	ADO1	Adenosine kinase	MSMS	0	921.998	2	921.991	1841.97	NaN	NaN	NaN	NaN	NaN	NaN	NaN	NaN	NaN	80.638	1	82.871	82.371	83.371	2.2335								0	0	0
doa10Δ(H)/WT(L) Rep1	GAAYVLGAGQVVYFGSVGK	19	1	Unmodified	_GAAYVLGAGQVVYFGSVGK_					0	0	0	0	P47143	P47143	P47143	ADO1	Adenosine kinase	MULTI-MATCH			3	614.996	1841.97	81275.6	5.1158	0.0031462	0.30227	0.0001859	5.418	0.0033321	615.331	618.002	81.385	0.28011	83.618	83.527	83.807	2.2335	-0.17833	-0.00013877	NaN	39.349	81	30	5	NaN	NaN	NaN
doa10Δ(H)/WT(L) Rep1	GAAYVLGAGQVVYFGSVGKDK	21	2	Unmodified	_GAAYVLGAGQVVYFGSVGKDK_					0	0	0	1	P47143	P47143	P47143	ADO1	Adenosine kinase	MULTI-MATCH			3	696.037	2085.09	72507.2	5.8865	0.0040972	0.58362	0.00040622	6.4701	0.0045035	696.371	701.715	72.713	0.42095	74.847	74.709	75.13	2.1334	0.14301	0.0017584	NaN	37.292	82	44	4	NaN	NaN	NaN
doa10Δ(H)/WT(L) Rep1	GTSTYPVKPLDSSK	14	2	Unmodified	_GTSTYPVKPLDSSK_					0	0	0	1	P47143	P47143	P47143	ADO1	Adenosine kinase	MULTI-MSMS		493.93	3	493.928	1478.76	85846.3	5.3962	0.0026653	0.30373	0.00015002	5.7	0.0028154	493.928	499.271	29.887	0.75998	31.82	31.489	32.249	1.9329					459	79	7	0	0	0
doa10Δ(H)/WT(L) Rep1	LFYIGGFHLTVSPDAIVK	18	1	Unmodified	_LFYIGGFHLTVSPDAIVK_					0	0	0	0	P47143	P47143	P47143	ADO1	Adenosine kinase	MULTI-MSMS		660.039	3	659.7	1976.08	75047.1	6.13	0.004044	1.0108	0.00066685	7.1409	0.0047108	660.035	662.372	92.413	0.069168	94.546	94.492	94.561	2.1332					38	7	6	0	0	0
doa10Δ(H)/WT(L) Rep1	LFYIGGFHLTVSPDAIVK	18	1	Unmodified	_LFYIGGFHLTVSPDAIVK_					0	0	0	0	P47143	P47143	P47143	ADO1	Adenosine kinase	MULTI-MSMS		662.708	3	659.7	1976.08	75665.8	6.2373	0.0041148	-0.11737	-7.74e-05	6.12	0.0040373	660.034	662.705	92.93	0.58647	95.063	94.561	95.148	2.1332					555	61	13	0	0	0
doa10Δ(H)/WT(L) Rep1	LFYIGGFHLTVSPDAIVK	18	1	Unmodified	_LFYIGGFHLTVSPDAIVK_					0	0	0	0	P47143	P47143	P47143	ADO1	Adenosine kinase	MULTI-MSMS		660.038	3	659.7	1976.08	75415.2	6.2757	0.0041401	0.8283	0.00054643	7.104	0.0046865	660.035	662.706	93.079	0.20781	95.212	95.077	95.285	2.1332					182	22	9	0	0	0
doa10Δ(H)/WT(L) Rep1	LFYIGGFHLTVSPDAIVK	18	1	Unmodified	_LFYIGGFHLTVSPDAIVK_					0	0	0	0	P47143	P47143	P47143	ADO1	Adenosine kinase	MULTI-MSMS		662.71	3	659.7	1976.08	75439.4	6.1747	0.0040735	0.015663	1.03e-05	6.1904	0.0040838	660.034	662.705	93.451	0.83247	95.585	95.41	96.242	2.1332					394	85	10	0	0	0
doa10Δ(H)/WT(L) Rep1	LFYIGGFHLTVSPDAIVK	18	1	Unmodified	_LFYIGGFHLTVSPDAIVK_					0	0	0	0	P47143	P47143	P47143	ADO1	Adenosine kinase	MULTI-MSMS		659.703	3	659.7	1976.08	75268.6	6.003	0.0039602	-0.00829	-5.47e-06	5.9947	0.0039547	660.034	662.706	94.261	0.21311	96.394	96.233	96.447	2.1332					157	21	9	0	0	0
doa10Δ(H)/WT(L) Rep1	LFYIGGFHLTVSPDAIVK	18	1	Unmodified	_LFYIGGFHLTVSPDAIVK_					0	0	0	0	P47143	P47143	P47143	ADO1	Adenosine kinase	MULTI-MSMS		660.037	3	659.7	1976.08	75122.8	5.9388	0.0039179	0.79293	0.00052309	6.7318	0.0044409	659.7	662.707	94.454	0.50336	96.588	96.437	96.941	2.1332					185	52	7	0	0	0
doa10Δ(H)/WT(L) Rep1	LFYIGGFHLTVSPDAIVK	18	1	Unmodified	_LFYIGGFHLTVSPDAIVK_					0	0	0	0	P47143	P47143	P47143	ADO1	Adenosine kinase	MULTI-MSMS		662.376	3	659.7	1976.08	75415.2	5.9214	0.0039063	0.68162	0.00044966	6.603	0.004356	660.034	662.372	94.996	0.40676	97.03	96.797	97.203	2.0331					226	42	8	0	0	0
doa10Δ(H)/WT(L) Rep1	LFYIGGFHLTVSPDAIVK	18	1	Unmodified	_LFYIGGFHLTVSPDAIVK_					0	0	0	0	P47143	P47143	P47143	ADO1	Adenosine kinase	MULTI-MSMS		662.71	3	659.7	1976.08	75779.2	5.9222	0.0039068	0.48651	0.00032095	6.4087	0.0042278	660.034	662.706	95.249	0.15031	97.282	97.158	97.309	2.0331					65	15	7	0	0	0
doa10Δ(H)/WT(L) Rep1	LFYIGGFHLTVSPDAIVK	18	1	Unmodified	_LFYIGGFHLTVSPDAIVK_					0	0	0	0	P47143	P47143	P47143	ADO1	Adenosine kinase	MULTI-MSMS		663.044	3	659.7	1976.08	76691.8	5.9175	0.0039037	0.23914	0.00015776	6.1566	0.0040615	660.034	662.371	95.639	0.43929	97.672	97.417	97.857	2.0331					180	46	7	0	0	0
doa10Δ(H)/WT(L) Rep1	LFYIGGFHLTVSPDAIVK	18	1	Unmodified	_LFYIGGFHLTVSPDAIVK_					0	0	0	0	P47143	P47143	P47143	ADO1	Adenosine kinase	MULTI-MSMS		662.71	3	659.7	1976.08	75983.7	5.9606	0.0039322	-0.10546	-6.96e-05	5.8552	0.0038626	660.034	662.705	96.256	0.27394	98.31	98.116	98.39	2.0533					79	28	4	0	0	0
doa10Δ(H)/WT(L) Rep1	LFYIGGFHLTVSPDAIVK	18	1	Unmodified	_LFYIGGFHLTVSPDAIVK_					0	0	0	0	P47143	P47143	P47143	ADO1	Adenosine kinase	MULTI-MSMS		660.037	3	659.7	1976.08	78885.9	5.6477	0.0037258	-0.0252	-1.66e-05	5.6225	0.0037091	660.034	662.706	98.28	0.34368	100.41	100.23	100.57	2.1334					130	35	5	0	0	0
doa10Δ(H)/WT(L) Rep1	LFYIGGFHLTVSPDAIVK	18	1	Unmodified	_LFYIGGFHLTVSPDAIVK_					0	0	0	0	P47143	P47143	P47143	ADO1	Adenosine kinase	MULTI-MSMS		659.703	3	659.7	1976.08	76372.4	5.7896	0.0038194	0.53948	0.0003559	6.3291	0.0041753	660.034	662.372	99.937	0.20413	101.97	101.85	102.06	2.0331					86	22	7	0	0	0
doa10Δ(H)/WT(L) Rep1	LFYIGGFHLTVSPDAIVK	18	1	Unmodified	_LFYIGGFHLTVSPDAIVK_					0	0	0	0	P47143	P47143	P47143	ADO1	Adenosine kinase	MULTI-MSMS		662.708	3	659.7	1976.08	75485.8	5.7901	0.0038197	-0.030708	-2.03e-05	5.7594	0.0037995	660.034	662.705	101.59	0.38486	103.63	103.48	103.86	2.0331					130	39	8	0	0	0
doa10Δ(H)/WT(L) Rep1	LFYIGGFHLTVSPDAIVK	18	1	Unmodified	_LFYIGGFHLTVSPDAIVK_					0	0	0	0	P47143	P47143	P47143	ADO1	Adenosine kinase	MULTI-MSMS		662.709	3	659.7	1976.08	77344.3	5.6686	0.0037396	0.31667	0.00020891	5.9853	0.0039485	660.034	662.706	103.71	0.3884	105.64	105.52	105.9	1.9329					148	40	7	0	0	0
doa10Δ(H)/WT(L) Rep1	LFYIGGFHLTVSPDAIVK	18	1	Unmodified	_LFYIGGFHLTVSPDAIVK_					0	0	0	0	P47143	P47143	P47143	ADO1	Adenosine kinase	MULTI-MSMS		662.708	3	659.7	1976.08	77821.9	5.589	0.0036871	0.40201	0.0002652	5.991	0.0039523	659.7	662.371	104.6	0.23958	106.53	106.38	106.62	1.9329					74	24	6	0	0	0
doa10Δ(H)/WT(L) Rep1	LFYIGGFHLTVSPDAIVK	18	1	Unmodified	_LFYIGGFHLTVSPDAIVK_					0	0	0	0	P47143	P47143	P47143	ADO1	Adenosine kinase	MULTI-MSMS		660.04	3	659.7	1976.08	75854.6	5.6341	0.0037168	0.37708	0.00024876	6.0112	0.0039656	660.034	662.706	106.15	0.27365	107.89	107.8	108.08	1.7324					76	29	6	0	0	0
doa10Δ(H)/WT(L) Rep1	LFYIGGFHLTVSPDAIVK	18	1	Unmodified	_LFYIGGFHLTVSPDAIVK_					0	0	0	0	P47143	P47143	P47143	ADO1	Adenosine kinase	MULTI-MSMS		659.703	3	659.7	1976.08	76443.2	4.8487	0.0031987	0.54372	0.00035869	5.3924	0.0035574	660.034	662.372	111.07	0.41904	111.6	111.34	111.76	0.52949					120	44	5	0	0	0
doa10Δ(H)/WT(L) Rep1	LFYIGGFHLTVSPDAIVK	18	1	Unmodified	_LFYIGGFHLTVSPDAIVK_					0	0	0	0	P47143	P47143	P47143	ADO1	Adenosine kinase	MULTI-SECPEP		989.552	2	989.046	1976.08	61585.8	5.5307	0.0054701	-0.018065	-1.79e-05	5.5126	0.0054522	989.547	993.554	92.74	0.22767	94.873	94.727	94.955	2.1332					63	22	5	0	0	0
doa10Δ(H)/WT(L) Rep1	LFYIGGFHLTVSPDAIVK	18	1	Unmodified	_LFYIGGFHLTVSPDAIVK_					0	0	0	0	P47143	P47143	P47143	ADO1	Adenosine kinase	MULTI-SECPEP		660.038	3	659.7	1976.08	75268.7	6.0629	0.0039997	0.11666	7.7e-05	6.1795	0.0040766	660.034	662.705	93.904	0.32391	96.037	95.918	96.242	2.1332					205	32	8	0	0	0
doa10Δ(H)/WT(L) Rep1	LFYIGGFHLTVSPDAIVK	18	1	Unmodified	_LFYIGGFHLTVSPDAIVK_					0	0	0	0	P47143	P47143	P47143	ADO1	Adenosine kinase	MULTI-SECPEP		659.706	3	659.7	1976.08	76784.2	5.7174	0.0037718	0.10646	7.02e-05	5.8238	0.003842	660.034	662.706	98.681	0.16598	100.81	100.74	100.9	2.1334					44	17	6	0	0	0
doa10Δ(H)/WT(L) Rep1	LFYIGGFHLTVSPDAIVK	18	1	Unmodified	_LFYIGGFHLTVSPDAIVK_					0	0	0	0	P47143	P47143	P47143	ADO1	Adenosine kinase	MULTI-MATCH			2	989.046	1976.08	61585.9	5.5853	0.0055242	1.6295	0.0016116	7.2148	0.0071358	989.549	993.556	92.93	0.12305	95.063	94.945	95.068	2.1332	0.47693	0.002056	NaN	179.81	44	12	5	NaN	NaN	NaN
doa10Δ(H)/WT(L) Rep1	LFYIGGFHLTVSPDAIVK	18	1	Unmodified	_LFYIGGFHLTVSPDAIVK_					0	0	0	0	P47143	P47143	P47143	ADO1	Adenosine kinase	MULTI-MATCH			3	659.7	1976.08	77634.2	5.6455	0.0037243	0.14908	9.83e-05	5.7946	0.0038227	660.034	662.706	97.922	0.29442	100.06	99.901	100.2	2.1334	0.037258	0.0006128	NaN	45.452	121	30	6	NaN	NaN	NaN
doa10Δ(H)/WT(L) Rep1	LFYIGGFHLTVSPDAIVK	18	1	Unmodified	_LFYIGGFHLTVSPDAIVK_					0	0	0	0	P47143	P47143	P47143	ADO1	Adenosine kinase	MULTI-MATCH			3	659.7	1976.08	75178.7	5.9351	0.0039154	-0.40583	-0.00026772	5.5292	0.0036476	659.699	662.705	96.784	0.13198	98.917	98.851	98.982	2.1334	-0.90206	-0.00064979	NaN	63.462	40	13	5	NaN	NaN	NaN
doa10Δ(H)/WT(L) Rep1	LFYIGGFHLTVSPDAIVK	18	1	Unmodified	_LFYIGGFHLTVSPDAIVK_					0	0	0	0	P47143	P47143	P47143	ADO1	Adenosine kinase	MULTI-MATCH			3	659.7	1976.08	75122.6	6.1016	0.0040252	-1.0381	-0.00068486	5.0634	0.0033404	660.033	662.705	92.35	0.051926	94.484	94.44	94.492	2.1332	0.35612	-0.001912	NaN	82.349	16	5	5	NaN	NaN	NaN
doa10Δ(H)/WT(L) Rep1	LFYIGGFHLTVSPDAIVK	18	1	Unmodified	_LFYIGGFHLTVSPDAIVK_					0	0	0	0	P47143	P47143	P47143	ADO1	Adenosine kinase	MULTI-MATCH			3	659.7	1976.08	75415.1	6.245	0.0041198	-0.34045	-0.00022459	5.9045	0.0038952	660.034	662.371	93.173	0.28373	95.307	95.22	95.504	2.1332	0.52806	-0.0006974	NaN	118.19	117	23	9	NaN	NaN	NaN
doa10Δ(H)/WT(L) Rep1	LFYIGGFHLTVSPDAIVK	18	1	Unmodified	_LFYIGGFHLTVSPDAIVK_					0	0	0	0	P47143	P47143	P47143	ADO1	Adenosine kinase	MULTI-MATCH			3	659.7	1976.08	76686.9	5.762	0.0038012	-0.054011	-3.56e-05	5.708	0.0037656	660.034	662.371	102.6	0.28841	104.53	104.36	104.65	1.9329	0.19683	-0.00015019	NaN	82.837	96	30	8	NaN	NaN	NaN
doa10Δ(H)/WT(L) Rep1	LFYIGGFHLTVSPDAIVK	18	1	Unmodified	_LFYIGGFHLTVSPDAIVK_					0	0	0	0	P47143	P47143	P47143	ADO1	Adenosine kinase	MULTI-MATCH			3	659.7	1976.08	77725	5.7575	0.0037982	-0.17813	-0.00011751	5.5794	0.0036807	660.034	662.705	102.35	0.36633	104.29	104.01	104.38	1.9329	0.31752	-0.00049826	NaN	68.481	96	38	6	NaN	NaN	NaN
doa10Δ(H)/WT(L) Rep1	LFYIGGFHLTVSPDAIVK	18	1	Unmodified	_LFYIGGFHLTVSPDAIVK_					0	0	0	0	P47143	P47143	P47143	ADO1	Adenosine kinase	MULTI-MATCH			3	659.7	1976.08	75653.8	5.9111	0.0038996	0.21682	0.00014303	6.1279	0.0040426	660.034	662.706	96.939	0.188	99.072	98.982	99.17	2.1334	-0.19075	0.00018559	NaN	57.148	77	19	5	NaN	NaN	NaN
doa10Δ(H)/WT(L) Rep1	LFYIGGFHLTVSPDAIVK	18	1	Unmodified	_LFYIGGFHLTVSPDAIVK_					0	0	0	0	P47143	P47143	P47143	ADO1	Adenosine kinase	MULTI-MATCH			3	659.7	1976.08	77954	5.6123	0.0037024	0.028056	1.85e-05	5.6404	0.003721	660.034	662.705	105.98	0.1877	107.72	107.62	107.8	1.7324	-0.33553	-0.0003504	NaN	36.597	48	20	5	NaN	NaN	NaN
doa10Δ(H)/WT(L) Rep1	LFYIGGFHLTVSPDAIVK	18	1	Unmodified	_LFYIGGFHLTVSPDAIVK_					0	0	0	0	P47143	P47143	P47143	ADO1	Adenosine kinase	MULTI-MATCH			3	659.7	1976.08	77808.9	5.5749	0.0036778	-0.10229	-6.75e-05	5.4726	0.0036103	660.034	662.705	105.45	0.3159	107.28	107.15	107.47	1.8327	-0.35866	-0.0006401	NaN	23.336	84	34	6	NaN	NaN	NaN
doa10Δ(H)/WT(L) Rep1	LFYIGGFHLTVSPDAIVK	18	1	Unmodified	_LFYIGGFHLTVSPDAIVK_					0	0	0	0	P47143	P47143	P47143	ADO1	Adenosine kinase	MULTI-MATCH			3	659.7	1976.08	76096.8	5.7007	0.0037608	-0.071649	-4.73e-05	5.6291	0.0037135	660.034	662.705	103.46	0.24222	105.39	105.23	105.47	1.9329	-0.12168	-0.00060021	NaN	42.314	132	25	9	NaN	NaN	NaN
doa10Δ(H)/WT(L) Rep1	LFYIGGFHLTVSPDAIVK	18	1	Unmodified	_LFYIGGFHLTVSPDAIVK_					0	0	0	0	P47143	P47143	P47143	ADO1	Adenosine kinase	MULTI-MATCH			3	659.7	1976.08	75046.9	6.1036	0.0040266	-0.90018	-0.00059385	5.2034	0.0034327	659.699	662.705	92.299	0.054153	94.432	94.386	94.44	2.1332	0.54035	-0.0022414	NaN	91.657	21	5	6	NaN	NaN	NaN
doa10Δ(H)/WT(L) Rep1	LFYIGGFHLTVSPDAIVK	18	1	Unmodified	_LFYIGGFHLTVSPDAIVK_					0	0	0	0	P47143	P47143	P47143	ADO1	Adenosine kinase	MULTI-MATCH			3	659.7	1976.08	76260	5.6393	0.0037202	-0.29854	-0.00019694	5.3407	0.0035233	660.033	662.705	106.25	0.082138	107.98	107.94	108.02	1.7324	1.1696	-0.0012682	NaN	42.314	23	8	4	NaN	NaN	NaN
doa10Δ(H)/WT(L) Rep1	LFYIGGFHLTVSPDAIVK	18	1	Unmodified	_LFYIGGFHLTVSPDAIVK_					0	0	0	0	P47143	P47143	P47143	ADO1	Adenosine kinase	MULTI-MATCH			3	659.7	1976.08	76232.8	5.9141	0.0039015	0.81437	0.00053724	6.7285	0.0044388	660.034	663.04	95.333	0.18943	97.366	97.309	97.498	2.0331	-0.060981	0.0008337	NaN	69.485	69	19	6	NaN	NaN	NaN
doa10Δ(H)/WT(L) Rep1	LFYIGGFHLTVSPDAIVK	18	1	Unmodified	_LFYIGGFHLTVSPDAIVK_					0	0	0	0	P47143	P47143	P47143	ADO1	Adenosine kinase	MULTI-MATCH			3	659.7	1976.08	77429.2	5.5592	0.0036674	0.40835	0.00026939	5.9676	0.0039368	660.034	662.706	109.51	0.32682	111.14	110.88	111.21	1.6322	-0.55344	-0.00049228	NaN	62.055	77	33	4	NaN	NaN	NaN
doa10Δ(H)/WT(L) Rep1	LFYIGGFHLTVSPDAIVK	18	1	Unmodified	_LFYIGGFHLTVSPDAIVK_					0	0	0	0	P47143	P47143	P47143	ADO1	Adenosine kinase	MULTI-MATCH			3	659.7	1976.08	76975.5	5.7067	0.0037647	0.031227	2.06e-05	5.7379	0.0037853	659.7	662.706	107.04	0.26204	108.77	108.61	108.88	1.7324	-1.5127	-0.0013548	NaN	52.372	65	28	4	NaN	NaN	NaN
doa10Δ(H)/WT(L) Rep1	PFVLNFSAPFIPHVFK	16	1	Unmodified	_PFVLNFSAPFIPHVFK_					0	0	0	0	P47143	P47143	P47143	ADO1	Adenosine kinase	MULTI-MSMS		621.016	3	620.678	1859.01	76429.6	5.1378	0.0031889	0.071519	4.44e-05	5.2093	0.0032333	621.013	623.35	103.39	0.8024	105.32	104.72	105.52	1.9329					558	84	9	0	0	0
doa10Δ(H)/WT(L) Rep1	PFVLNFSAPFIPHVFK	16	1	Unmodified	_PFVLNFSAPFIPHVFK_					0	0	0	0	P47143	P47143	P47143	ADO1	Adenosine kinase	MULTI-MSMS		621.016	3	620.678	1859.01	75811.2	5.0911	0.0031599	0.36673	0.00022762	5.4578	0.0033875	621.013	623.684	103.78	1.026	105.72	105.48	106.51	1.9329					442	109	9	0	0	0
doa10Δ(H)/WT(L) Rep1	PFVLNFSAPFIPHVFK	16	1	Unmodified	_PFVLNFSAPFIPHVFK_					0	0	0	0	P47143	P47143	P47143	ADO1	Adenosine kinase	MULTI-MATCH			3	620.678	1859.01	85653.3	4.9974	0.0031018	0.048378	3e-05	5.0458	0.0031318	621.013	623.35	104.66	0.30915	106.59	106.45	106.76	1.9329	0.62687	-0.00040949	NaN	85.163	46	32	4	NaN	NaN	NaN
doa10Δ(H)/WT(L) Rep1	SGDAKMAIFDELLQMPETK	19	2	GlyGly (K)	_SGDAK(gl)MAIFDELLQMPETK_					0	1	0	1	P47143	P47143	P47143	ADO1	Adenosine kinase	MULTI-MATCH			3	746.698	2237.07	69706.2	5.6627	0.0042283	-0.21347	-0.0001594	5.4492	0.0040689	747.032	752.04	95.656	0.88811	97.689	97.318	98.206	2.0331	-0.074557	-0.00036959	NaN	113.73	388	94	7	NaN	NaN	NaN
doa10Δ(H)/WT(L) Rep1	SMYQVQNDIGTGK	13	1	Unmodified	_SMYQVQNDIGTGK_					0	0	0	0	P47143	P47143	P47143	ADO1	Adenosine kinase	MULTI-MSMS		724.854	2	720.843	1439.67	70398.4	6.1182	0.0044103	0.066837	4.82e-05	6.185	0.0044584	720.843	724.85	42.317	0.57761	44.35	44.016	44.594	2.0333					288	61	7	0	0	0
doa10Δ(H)/WT(L) Rep1	SMYQVQNDIGTGKCAALITGHNR	23	1	GlyGly (K)	_SMYQVQNDIGTGK(gl)CAALITGHNR_					0	1	0	1	P47143	P47143	P47143	ADO1	Adenosine kinase	MULTI-MATCH			4	662.822	2647.26	74244.1	6.072	0.0040246	-0.6503	-0.00043103	5.4217	0.0035936	663.073	665.076	53.233	0.49693	55.367	55.038	55.535	2.1335	-0.51482	-0.00079635	NaN	84.975	239	50	9	NaN	NaN	NaN
doa10Δ(H)/WT(L) Rep1	DTTHIKFASDPGCAFTK	17	2	GlyGly (K)	_DTTHIK(gl)FASDPGCAFTK_	DTTHIK(1)FASDPGCAFTK		DTTHIK(47.37)FASDPGCAFTK(-47.37)		0	1	0	1	P38013	P38013	P38013	AHP1	Peroxiredoxin type-2	MULTI-MSMS		507.25	4	503.24	2008.93	83705.6	4.7101	0.0023703	-0.97192	-0.00048911	3.7381	0.0018812	503.49	507.247	49.124	0.5794	51.258	51.232	51.811	2.1335					223	63	7	0	0	0
doa10Δ(H)/WT(L) Rep1	DTTHIKFASDPGCAFTK	17	2	GlyGly (K)	_DTTHIK(gl)FASDPGCAFTK_	DTTHIK(1)FASDPGCAFTK		DTTHIK(68.25)FASDPGCAFTK(-68.25)		0	1	0	1	P38013	P38013	P38013	AHP1	Peroxiredoxin type-2	MULTI-SECPEP		671.324	3	670.651	2008.93	73643	4.6859	0.0031426	-0.46488	-0.00031177	4.221	0.0028308	670.985	675.994	48.945	0.26052	51.079	50.971	51.232	2.1335					132	33	5	0	0	0
doa10Δ(H)/WT(L) Rep1	ETNPGTDVTVSSVESVLAHL	20	0	Unmodified	_ETNPGTDVTVSSVESVLAHL_					0	0	0	0	P38013	P38013	P38013	AHP1	Peroxiredoxin type-2	ISO-MSMS	-1	1028.01	2	1028.02	2054.02	NaN	NaN	NaN	-0.50551	-0.00051967	NaN	NaN	NaN	NaN	111.8	0.23794	112.33	112.18	112.42	0.5295								0	0	0
doa10Δ(H)/WT(L) Rep1	ETNPGTDVTVSSVESVLAHL	20	0	Unmodified	_ETNPGTDVTVSSVESVLAHL_					0	0	0	0	P38013	P38013	P38013	AHP1	Peroxiredoxin type-2	ISO-MSMS	-1	685.683	3	685.68	2054.02	NaN	NaN	NaN	0.027517	1.89e-05	NaN	NaN	NaN	NaN	111.82	0.16355	112.35	112.21	112.38	0.52949								0	0	0
doa10Δ(H)/WT(L) Rep1	FASDPGCAFTK	11	1	Unmodified	_FASDPGCAFTK_					0	0	0	0	P38013	P38013	P38013	AHP1	Peroxiredoxin type-2	MULTI-MSMS		604.782	2	600.771	1199.53	75238.3	5.4783	0.0032912	-0.24149	-0.00014508	5.2368	0.0031461	600.771	604.778	41.063	0.72738	43.097	42.783	43.51	2.0333					513	78	11	0	0	0
doa10Δ(H)/WT(L) Rep1	FQYIAISQSDADSESCK	17	1	Unmodified	_FQYIAISQSDADSESCK_					0	0	0	0	P38013	P38013	P38013	AHP1	Peroxiredoxin type-2	MULTI-MSMS		975.44	2	974.933	1947.85	61355.7	5.2191	0.0050882	-0.09379	-9.14e-05	5.1253	0.0049968	975.435	978.94	56.301	0.69029	58.335	58.094	58.784	2.0333					431	69	9	0	0	0
doa10Δ(H)/WT(L) Rep1	FQYIAISQSDADSESCK	17	1	Unmodified	_FQYIAISQSDADSESCK_					0	0	0	0	P38013	P38013	P38013	AHP1	Peroxiredoxin type-2	MULTI-MATCH			3	650.291	1947.85	75137.8	5.6488	0.0036734	-0.021331	-1.39e-05	5.6275	0.0036595	650.291	653.297	56.36	0.56158	58.393	58.136	58.698	2.0333	0.001749	0.00032876	NaN	83.252	273	56	8	NaN	NaN	NaN
doa10Δ(H)/WT(L) Rep1	FQYIAISQSDADSESCKMPQTVEWSK	26	2	Unmodified	_FQYIAISQSDADSESCKMPQTVEWSK_					0	0	0	1	P38013	P38013	P38013	AHP1	Peroxiredoxin type-2	MULTI-MSMS		1012.8	3	1012.46	3034.37	60312.8	5.3262	0.0053926	-0.20336	-0.0002059	5.1228	0.0051867	1013.47	1018.14	71.031	0.45171	73.164	72.877	73.329	2.1334					228	50	8	0	0	0
doa10Δ(H)/WT(L) Rep1	FQYIAISQSDADSESCKMPQTVEWSK	26	2	Unmodified	_FQYIAISQSDADSESCKMPQTVEWSK_					0	0	0	1	P38013	P38013	P38013	AHP1	Peroxiredoxin type-2	MSMS	1	1017.81	3	1012.46	3034.37	NaN	NaN	NaN	NaN	NaN	NaN	NaN	NaN	NaN	70.815	1	72.948	72.448	73.448	2.1334								0	0	0
doa10Δ(H)/WT(L) Rep1	LISENKK	7	2	Unmodified	_LISENKK_					0	0	0	1	P38013	P38013	P38013	AHP1	Peroxiredoxin type-2	MULTI-MSMS		424.266	2	416.25	830.486	92392.3	5.0457	0.0021003	0.35227	0.00014663	5.398	0.0022469	416.25	424.264	7.5403	0.24366	8.2704	8.1699	8.4135	0.73012					99	22	8	0	0	0
doa10Δ(H)/WT(L) Rep1	MPQTVEWSK	9	1	Unmodified	_MPQTVEWSK_					0	0	0	0	P38013	P38013	P38013	AHP1	Peroxiredoxin type-2	MULTI-MSMS		557.281	2	553.271	1104.53	79173.5	5.5547	0.0030733	-0.31459	-0.00017405	5.2401	0.0028992	553.271	557.278	42.086	0.74141	44.119	43.744	44.485	2.0333					415	78	7	0	0	0
doa10Δ(H)/WT(L) Rep1	SDLVNKK	7	2	Acetyl (Protein N-term)	_(ac)SDLVNKK_					1	0	0	1	P38013	P38013	P38013	AHP1	Peroxiredoxin type-2	MULTI-MSMS		431.257	2	423.24	844.465	91578.1	5.3308	0.0022562	-0.058047	-2.46e-05	5.2727	0.0022316	423.24	431.254	21.665	0.78337	23.398	23.006	23.79	1.7324					331	78	8	0	0	0
doa10Δ(H)/WT(L) Rep1	VIITGAPAAFSPTCTVSHIPGYINYLDELVK	31	1	Unmodified	_VIITGAPAAFSPTCTVSHIPGYINYLDELVK_					0	0	0	0	P38013	P38013	P38013	AHP1	Peroxiredoxin type-2	MULTI-MATCH			3	1116.25	3345.73	57895.7	4.6322	0.0051707	-0.16213	-0.00018098	4.4701	0.0049898	1116.92	1119.26	108.91	0.91602	110.54	110.05	110.96	1.6322	-0.021229	-0.0008466	NaN	33.551	513	96	12	NaN	NaN	NaN
doa10Δ(H)/WT(L) Rep1	WAMVVENGIVTYAAK	15	1	Unmodified	_WAMVVENGIVTYAAK_					0	0	0	0	P38013	P38013	P38013	AHP1	Peroxiredoxin type-2	MULTI-MSMS		830.439	2	826.429	1650.84	64797.6	5.8211	0.0048107	-0.40989	-0.00033874	5.4112	0.004472	826.429	830.436	77.959	1.4939	80.193	79.622	81.116	2.2335					995	156	9	0	0	0
doa10Δ(H)/WT(L) Rep1	WAMVVENGIVTYAAK	15	1	Unmodified	_WAMVVENGIVTYAAK_					0	0	0	0	P38013	P38013	P38013	AHP1	Peroxiredoxin type-2	MULTI-MSMS		553.963	3	551.289	1650.84	78771.4	5.4666	0.0030137	-0.047565	-2.62e-05	5.4191	0.0029875	551.623	554.294	77.951	1.1406	80.184	79.705	80.846	2.2335					536	117	7	0	0	0
doa10Δ(H)/WT(L) Rep1	WAMVVENGIVTYAAK	15	1	Unmodified	_WAMVVENGIVTYAAK_					0	0	0	0	P38013	P38013	P38013	AHP1	Peroxiredoxin type-2	ISO-MSMS	1	830.441	2	826.429	1650.84	NaN	NaN	NaN	0.049736	4.11e-05	NaN	NaN	NaN	NaN	78.953	0.32631	81.186	81.106	81.432	2.2335								0	0	0
doa10Δ(H)/WT(L) Rep1	WAMVVENGIVTYAAK	15	1	Unmodified	_WAMVVENGIVTYAAK_					0	0	0	0	P38013	P38013	P38013	AHP1	Peroxiredoxin type-2	ISO-MSMS	1	830.442	2	826.429	1650.84	NaN	NaN	NaN	-0.75016	-0.00061996	NaN	NaN	NaN	NaN	79.425	0.45127	81.659	81.432	81.883	2.2335								0	0	0
doa10Δ(H)/WT(L) Rep1	WAMVVENGIVTYAAK	15	1	Unmodified	_WAMVVENGIVTYAAK_					0	0	0	0	P38013	P38013	P38013	AHP1	Peroxiredoxin type-2	MSMS	1	830.439	2	826.429	1650.84	NaN	NaN	NaN	NaN	NaN	NaN	NaN	NaN	NaN	77.551	1	79.784	79.284	80.284	2.2335								0	0	0
doa10Δ(H)/WT(L) Rep1	WAMVVENGIVTYAAK	15	1	Unmodified	_WAMVVENGIVTYAAK_					0	0	0	0	P38013	P38013	P38013	AHP1	Peroxiredoxin type-2	MULTI-MATCH			2	826.429	1650.84	65236.7	6.1879	0.0051139	-0.23974	-0.00019813	5.9482	0.0049158	826.429	830.938	79.922	0.47684	82.155	81.929	82.406	2.2335	0.60686	-0.0007578	NaN	142.45	96	50	4	NaN	NaN	NaN
doa10Δ(H)/WT(L) Rep1	WAMVVENGIVTYAAK	15	1	Oxidation (M)	_WAM(ox)VVENGIVTYAAK_		WAM(1)VVENGIVTYAAK		WAM(65.22)VVENGIVTYAAK	0	0	1	0	P38013	P38013	P38013	AHP1	Peroxiredoxin type-2	MULTI-MSMS		838.942	2	834.427	1666.84	65100.8	5.4323	0.0045328	0.35585	0.00029693	5.7881	0.0048298	834.928	838.935	66.47	0.42992	68.603	68.382	68.812	2.1334					142	46	5	0	0	0
doa10Δ(H)/WT(L) Rep1	GLSELNDAFSR	11	0	Unmodified	_GLSELNDAFSR_					0	0	0	0	P38884	P38884	P38884	AIM18	Altered inheritance of mitochondria protein 18, mitochondrial	ISO-MSMS	-1	604.802	2	604.799	1207.58	NaN	NaN	NaN	0.15716	9.5e-05	NaN	NaN	NaN	NaN	58.644	0.74366	60.678	60.301	61.044	2.0333								0	0	0
doa10Δ(H)/WT(L) Rep1	LLSPLADVLHAAIGATR	17	0	Unmodified	_LLSPLADVLHAAIGATR_					0	0	0	0	Q12480	Q12480	Q12480	AIM45	Probable electron transfer flavoprotein subunit alpha, mitochondrial	ISO-MSMS	-1	573.675	3	573.337	1716.99	NaN	NaN	NaN	0.47978	0.00027508	NaN	NaN	NaN	NaN	99.189	0.56977	101.32	100.95	101.52	2.1334								0	0	0
doa10Δ(H)/WT(L) Rep1	LLSPLADVLHAAIGATR	17	0	Unmodified	_LLSPLADVLHAAIGATR_					0	0	0	0	Q12480	Q12480	Q12480	AIM45	Probable electron transfer flavoprotein subunit alpha, mitochondrial	ISO-MSMS	-1	573.34	3	573.337	1716.99	NaN	NaN	NaN	0.95239	0.00054604	NaN	NaN	NaN	NaN	99.549	0.35168	101.68	101.64	102	2.1334								0	0	0
doa10Δ(H)/WT(L) Rep1	TFIRPIYAGNIISTIECQAEKK	22	2	Unmodified	_TFIRPIYAGNIISTIECQAEKK_					0	0	0	2	Q12480	Q12480	Q12480	AIM45	Probable electron transfer flavoprotein subunit alpha, mitochondrial	MULTI-MATCH			4	638.844	2551.35	76824.1	5.4125	0.0034577	0.57315	0.00036615	5.9857	0.0038239	639.346	643.102	85.724	0.31145	87.957	87.852	88.163	2.2335	-0.46643	-0.00082866	NaN	70.452	75	33	5	NaN	NaN	NaN
doa10Δ(H)/WT(L) Rep1	VVAPNLYIAIGVSGAVQHLAGMK	23	1	Unmodified	_VVAPNLYIAIGVSGAVQHLAGMK_					0	0	0	0	Q12480	Q12480	Q12480	AIM45	Probable electron transfer flavoprotein subunit alpha, mitochondrial	MULTI-MSMS		772.777	3	770.1	2307.28	68827.7	5.277	0.0040638	0.64926	0.0005	5.9262	0.0045638	770.435	773.106	105.05	0.28862	106.89	106.73	107.02	1.8327					79	32	4	0	0	0
doa10Δ(H)/WT(L) Rep1	VVAPNLYIAIGVSGAVQHLAGMK	23	1	Unmodified	_VVAPNLYIAIGVSGAVQHLAGMK_					0	0	0	0	Q12480	Q12480	Q12480	AIM45	Probable electron transfer flavoprotein subunit alpha, mitochondrial	MULTI-MSMS		773.109	3	770.1	2307.28	68732.6	5.3062	0.0040863	0.0026357	2.03e-06	5.3088	0.0040883	770.434	773.105	105.44	0.49631	107.27	107.1	107.6	1.8327					201	54	6	0	0	0
doa10Δ(H)/WT(L) Rep1	VVAPNLYIAIGVSGAVQHLAGMK	23	1	Unmodified	_VVAPNLYIAIGVSGAVQHLAGMK_					0	0	0	0	Q12480	Q12480	Q12480	AIM45	Probable electron transfer flavoprotein subunit alpha, mitochondrial	MULTI-MSMS		770.438	3	770.1	2307.28	68827.7	5.3325	0.0041065	0.012134	9.34e-06	5.3446	0.0041159	770.434	773.105	105.81	0.12009	107.64	107.58	107.7	1.8327					58	12	7	0	0	0
doa10Δ(H)/WT(L) Rep1	VVAPNLYIAIGVSGAVQHLAGMK	23	1	Unmodified	_VVAPNLYIAIGVSGAVQHLAGMK_					0	0	0	0	Q12480	Q12480	Q12480	AIM45	Probable electron transfer flavoprotein subunit alpha, mitochondrial	MSMS	1	772.775	3	770.1	2307.28	NaN	NaN	NaN	NaN	NaN	NaN	NaN	NaN	NaN	105.29	1	107.12	106.62	107.62	1.8327								0	0	0
doa10Δ(H)/WT(L) Rep1	VVAPNLYIAIGVSGAVQHLAGMK	23	1	Unmodified	_VVAPNLYIAIGVSGAVQHLAGMK_					0	0	0	0	Q12480	Q12480	Q12480	AIM45	Probable electron transfer flavoprotein subunit alpha, mitochondrial	MULTI-MATCH			3	770.1	2307.28	70073.5	5.3442	0.0041155	-0.46073	-0.00035481	4.8834	0.0037607	770.433	773.105	105.95	0.17885	107.68	107.61	107.79	1.7344	-0.11333	-0.00097575	NaN	68.168	55	19	5	NaN	NaN	NaN
doa10Δ(H)/WT(L) Rep1	VVAPNLYIAIGVSGAVQHLAGMK	23	1	Unmodified	_VVAPNLYIAIGVSGAVQHLAGMK_					0	0	0	0	Q12480	Q12480	Q12480	AIM45	Probable electron transfer flavoprotein subunit alpha, mitochondrial	MULTI-MATCH			3	770.1	2307.28	70243.6	5.3651	0.0041317	0.188	0.00014478	5.5531	0.0042765	770.434	773.106	106.2	0.35381	107.94	107.78	108.13	1.7324	0.044529	0.00014082	NaN	48.354	85	38	4	NaN	NaN	NaN
doa10Δ(H)/WT(L) Rep1	VVAPNLYIAIGVSGAVQHLAGMKDSK	26	2	Unmodified	_VVAPNLYIAIGVSGAVQHLAGMKDSK_					0	0	0	1	Q12480	Q12480	Q12480	AIM45	Probable electron transfer flavoprotein subunit alpha, mitochondrial	MULTI-MATCH			4	660.365	2637.43	72771.4	5.9272	0.0039141	0.99613	0.00065781	6.9233	0.0045719	660.367	664.874	96.949	0.21776	99.082	98.936	99.153	2.1334	0.53333	0.00086042	NaN	110.16	64	22	6	NaN	NaN	NaN
doa10Δ(H)/WT(L) Rep1	VVAPNLYIAIGVSGAVQHLAGMKDSK	26	2	Unmodified	_VVAPNLYIAIGVSGAVQHLAGMKDSK_					0	0	0	1	Q12480	Q12480	Q12480	AIM45	Probable electron transfer flavoprotein subunit alpha, mitochondrial	MULTI-MATCH			4	660.365	2637.43	71662.9	5.9785	0.003948	0.36542	0.00024131	6.3439	0.0041893	660.367	664.623	96.206	0.37561	98.239	98.003	98.378	2.0331	-0.039011	-0.0013748	NaN	64.619	129	39	7	NaN	NaN	NaN
doa10Δ(H)/WT(L) Rep1	QTPLVLVYWKPMTVVSQEWK	20	2	Unmodified	_QTPLVLVYWKPMTVVSQEWK_					0	0	0	1	Q12156	Q12156	Q12156	AIM7	Protein AIM7	MULTI-MATCH			3	811.44	2431.3	67014.6	5.595	0.00454	-0.28075	-0.00022781	5.3142	0.0043122	811.44	817.116	99.124	1.2064	101.26	100.77	101.98	2.1334	0.09467	-0.0011804	NaN	69.979	464	130	8	NaN	NaN	NaN
doa10Δ(H)/WT(L) Rep1	GSQYLCSGDESGK	13	1	Unmodified	_GSQYLCSGDESGK_					0	0	0	0	P46680	P46680	P46680	AIP1	Actin-interacting protein 1	MULTI-MATCH			2	694.293	1386.57	72234.8	5.7047	0.0039607	0.23332	0.00016199	5.938	0.0041227	694.294	698.301	24.325	0.40229	26.158	26.004	26.406	1.8327	-0.23231	0.00051846	NaN	39.961	140	37	5	NaN	NaN	NaN
doa10Δ(H)/WT(L) Rep1	NFTTHLSYDPTTNAIAYPCGK	21	1	Unmodified	_NFTTHLSYDPTTNAIAYPCGK_					0	0	0	0	P46680	P46680	P46680	AIP1	Actin-interacting protein 1	MULTI-MATCH			3	791.039	2370.1	67882.4	5.6591	0.0044766	-0.99324	-0.00078569	4.6659	0.0036909	791.706	794.376	63.625	0.53607	65.759	65.449	65.985	2.1334	0.15034	-0.0019273	NaN	49.188	132	55	6	NaN	NaN	NaN
doa10Δ(H)/WT(L) Rep1	NNQKQDCFDLAEGMGTK	17	2	GlyGly (K)	_NNQK(gl)QDCFDLAEGMGTK_	NNQK(1)QDCFDLAEGMGTK		NNQK(41.24)QDCFDLAEGMGTK(-41.24)		0	1	0	1	Q12013	Q12013	Q12013	AKR2	Probable palmitoyltransferase AKR2	MULTI-MSMS		695.985	3	690.639	2068.89	72343.7	5.4759	0.0037818	0.36849	0.0002545	5.8444	0.0040363	690.973	696.316	47.626	0.42388	49.659	49.523	49.946	2.0333					219	44	8	0	0	0
doa10Δ(H)/WT(L) Rep1	LGQLSISVITK	11	1	Unmodified	_LGQLSISVITK_					0	0	0	0	P40825	P40825	P40825	ALA1	Alanine--tRNA ligase, mitochondrial	MULTI-MSMS		583.869	2	579.858	1157.7	78164.5	5.4698	0.0031717	0.30052	0.00017426	5.7703	0.003346	579.858	583.865	63.844	1.0857	65.978	65.591	66.676	2.1334					474	116	8	0	0	0
doa10Δ(H)/WT(L) Rep1	LGQLSISVITK	11	1	Unmodified	_LGQLSISVITK_					0	0	0	0	P40825	P40825	P40825	ALA1	Alanine--tRNA ligase, mitochondrial	MULTI-MATCH			2	579.858	1157.7	78927.3	5.697	0.0033034	0.25819	0.00014971	5.9552	0.0034532	579.858	583.865	64.697	0.34118	66.83	66.668	67.009	2.1334	1.4692	7.08e-05	NaN	92.112	94	35	5	NaN	NaN	NaN
doa10Δ(H)/WT(L) Rep1	NTFLDYFK	8	1	Unmodified	_NTFLDYFK_					0	0	0	0	P40825	P40825	P40825	ALA1	Alanine--tRNA ligase, mitochondrial	MULTI-MATCH			2	524.261	1046.51	85370	5.3703	0.0028155	-0.35998	-0.00018872	5.0104	0.0026267	524.261	528.268	85.052	0.56988	87.285	86.991	87.561	2.2335	-0.66129	-5.15e-05	NaN	58.981	171	61	4	NaN	NaN	NaN
doa10Δ(H)/WT(L) Rep1	TCFYAEQGGQEYDTGK	16	1	Unmodified	_TCFYAEQGGQEYDTGK_					0	0	0	0	P40825	P40825	P40825	ALA1	Alanine--tRNA ligase, mitochondrial	MULTI-MSMS		931.4	2	927.386	1852.76	66142.7	5.5906	0.0051847	0.29985	0.00027808	5.8905	0.0054627	927.887	931.393	42.806	0.25687	44.839	44.735	44.992	2.0333					60	25	4	0	0	0
doa10Δ(H)/WT(L) Rep1	TFFETNENAPYLVK	14	1	Unmodified	_TFFETNENAPYLVK_					0	0	0	0	P40825	P40825	P40825	ALA1	Alanine--tRNA ligase, mitochondrial	MULTI-MSMS		836.919	2	836.914	1671.81	66125.1	5.9301	0.004963	0.11034	9.23e-05	6.0405	0.0050554	836.915	840.922	69.911	0.65196	72.044	71.685	72.337	2.1334					270	66	6	0	0	0
doa10Δ(H)/WT(L) Rep1	YGSANVEGTILK	12	1	Unmodified	_YGSANVEGTILK_					0	0	0	0	P40825	P40825	P40825	ALA1	Alanine--tRNA ligase, mitochondrial	MULTI-MSMS		626.336	2	626.333	1250.65	77196.3	5.2867	0.0033113	0.55357	0.00034672	5.8403	0.003658	626.333	630.34	46.782	0.41984	48.815	48.591	49.011	2.0333					170	43	7	0	0	0
doa10Δ(H)/WT(L) Rep1	VPFGVVAQIVPWNYPLAMACR	21	0	Unmodified	_VPFGVVAQIVPWNYPLAMACR_					0	0	0	0	P54114	P54114	P54114	ALD3	Aldehyde dehydrogenase [NAD(P)+] 2	ISO-MSMS	-1	796.752	3	796.75	2387.23	NaN	NaN	NaN	-0.066447	-5.29e-05	NaN	NaN	NaN	NaN	111.67	0.34951	112.2	111.97	112.32	0.5295								0	0	0
doa10Δ(H)/WT(L) Rep1	VPFGVVAQIVPWNYPLAMACR	21	0	Unmodified	_VPFGVVAQIVPWNYPLAMACR_					0	0	0	0	P54114	P54114	P54114	ALD3	Aldehyde dehydrogenase [NAD(P)+] 2	ISO-MSMS	-1	1194.63	2	1194.62	2387.23	NaN	NaN	NaN	1.8948	0.0022636	NaN	NaN	NaN	NaN	111.68	0.079643	112.21	112.16	112.24	0.52949								0	0	0
doa10Δ(H)/WT(L) Rep1	AFSNGSWNGIDPIDR	15	0	Unmodified	_AFSNGSWNGIDPIDR_					0	0	0	0	P46367	P46367	P46367	ALD4	Potassium-activated aldehyde dehydrogenase, mitochondrial	ISO-MSMS	-1	824.893	2	824.889	1647.76	NaN	NaN	NaN	-0.20383	-0.00016814	NaN	NaN	NaN	NaN	68.193	0.4527	70.327	70.172	70.625	2.1334								0	0	0
doa10Δ(H)/WT(L) Rep1	AVQNIILGIYYNSGEVCCAGSR	22	0	Unmodified	_AVQNIILGIYYNSGEVCCAGSR_					0	0	0	0	P46367	P46367	P46367	ALD4	Potassium-activated aldehyde dehydrogenase, mitochondrial	ISO-MSMS	-1	612.052	4	611.798	2443.16	NaN	NaN	NaN	-0.79002	-0.00048334	NaN	NaN	NaN	NaN	90.931	0.4175	93.064	92.747	93.164	2.1332								0	0	0
doa10Δ(H)/WT(L) Rep1	HIYQSAAAGLK	11	1	Unmodified	_HIYQSAAAGLK_					0	0	0	0	P46367	P46367	P46367	ALD4	Potassium-activated aldehyde dehydrogenase, mitochondrial	MULTI-MSMS		583.827	2	579.817	1157.62	79256.5	5.5429	0.0032138	-0.15975	-9.26e-05	5.3831	0.0031212	579.817	583.824	23.72	0.3355	25.552	25.305	25.64	1.8327					100	33	4	0	0	0
doa10Δ(H)/WT(L) Rep1	TAESTPLSALYVSK	14	1	Unmodified	_TAESTPLSALYVSK_					0	0	0	0	P46367	P46367	P46367	ALD4	Potassium-activated aldehyde dehydrogenase, mitochondrial	MULTI-MSMS		738.403	2	733.89	1465.77	71899.6	5.907	0.0043351	-0.51876	-0.00038071	5.3883	0.0039544	733.89	737.897	63.939	0.68372	66.072	65.711	66.395	2.1334					282	74	5	0	0	0
doa10Δ(H)/WT(L) Rep1	VAFTGSTATGR	11	0	Unmodified	_VAFTGSTATGR_					0	0	0	0	P46367	P46367	P46367	ALD4	Potassium-activated aldehyde dehydrogenase, mitochondrial	ISO-MSMS	-1	534.28	2	534.278	1066.54	NaN	NaN	NaN	-0.22149	-0.00011834	NaN	NaN	NaN	NaN	26.267	0.65439	28.2	27.827	28.482	1.9329								0	0	0
doa10Δ(H)/WT(L) Rep1	VNAGTVWINTYNDFHHAVPFGGFNASGLGR	30	0	Unmodified	_VNAGTVWINTYNDFHHAVPFGGFNASGLGR_					0	0	0	0	P46367	P46367	P46367	ALD4	Potassium-activated aldehyde dehydrogenase, mitochondrial	ISO-MSMS	-1	805.65	4	805.394	3217.55	NaN	NaN	NaN	-0.0038304	-3.09e-06	NaN	NaN	NaN	NaN	93.452	0.31728	95.585	95.341	95.659	2.1332								0	0	0
doa10Δ(H)/WT(L) Rep1	VNAGTVWINTYNDFHHAVPFGGFNASGLGR	30	0	Unmodified	_VNAGTVWINTYNDFHHAVPFGGFNASGLGR_					0	0	0	0	P46367	P46367	P46367	ALD4	Potassium-activated aldehyde dehydrogenase, mitochondrial	ISO-MSMS	-1	805.9	4	805.394	3217.55	NaN	NaN	NaN	-0.041532	-3.35e-05	NaN	NaN	NaN	NaN	93.669	0.32865	95.802	95.649	95.977	2.1332								0	0	0
doa10Δ(H)/WT(L) Rep1	VNAGTVWINTYNDFHHAVPFGGFNASGLGR	30	0	Unmodified	_VNAGTVWINTYNDFHHAVPFGGFNASGLGR_					0	0	0	0	P46367	P46367	P46367	ALD4	Potassium-activated aldehyde dehydrogenase, mitochondrial	ISO-MSMS	-1	805.649	4	805.394	3217.55	NaN	NaN	NaN	-0.39767	-0.00032028	NaN	NaN	NaN	NaN	94.29	0.28294	96.423	96.26	96.543	2.1332								0	0	0
doa10Δ(H)/WT(L) Rep1	VNAGTVWINTYNDFHHAVPFGGFNASGLGR	30	0	Unmodified	_VNAGTVWINTYNDFHHAVPFGGFNASGLGR_					0	0	0	0	P46367	P46367	P46367	ALD4	Potassium-activated aldehyde dehydrogenase, mitochondrial	ISO-MSMS	-1	805.649	4	805.394	3217.55	NaN	NaN	NaN	0.1315	0.00010591	NaN	NaN	NaN	NaN	94.473	0.51353	96.606	96.473	96.987	2.1332								0	0	0
doa10Δ(H)/WT(L) Rep1	AGTVWINTYNNFHQNVPFGGFGQSGIGR	28	0	Unmodified	_AGTVWINTYNNFHQNVPFGGFGQSGIGR_					0	0	0	0	P40047	P40047	P40047	ALD5	Aldehyde dehydrogenase 5, mitochondrial	ISO-MSMS	-1	1014.17	3	1013.49	3037.46	NaN	NaN	NaN	0.098686	0.00010002	NaN	NaN	NaN	NaN	86.754	0.34562	88.988	88.786	89.132	2.2335								0	0	0
doa10Δ(H)/WT(L) Rep1	AGTVWINTYNNFHQNVPFGGFGQSGIGR	28	0	Unmodified	_AGTVWINTYNNFHQNVPFGGFGQSGIGR_					0	0	0	0	P40047	P40047	P40047	ALD5	Aldehyde dehydrogenase 5, mitochondrial	ISO-MSMS	-1	1014.17	3	1013.49	3037.46	NaN	NaN	NaN	0.024264	2.46e-05	NaN	NaN	NaN	NaN	87.236	0.50836	89.47	89.077	89.586	2.2335								0	0	0
doa10Δ(H)/WT(L) Rep1	AGTVWINTYNNFHQNVPFGGFGQSGIGR	28	0	Unmodified	_AGTVWINTYNNFHQNVPFGGFGQSGIGR_					0	0	0	0	P40047	P40047	P40047	ALD5	Aldehyde dehydrogenase 5, mitochondrial	ISO-MSMS	-1	1013.83	3	1013.49	3037.46	NaN	NaN	NaN	0.13516	0.00013699	NaN	NaN	NaN	NaN	87.451	0.62423	89.685	89.528	90.152	2.2335								0	0	0
doa10Δ(H)/WT(L) Rep1	EMGEAALSNYTQTK	14	1	Unmodified	_EMGEAALSNYTQTK_					0	0	0	0	P40047	P40047	P40047	ALD5	Aldehyde dehydrogenase 5, mitochondrial	ISO-MSMS	0	772.123	2	771.859	1541.7	NaN	NaN	NaN	1.6523	0.0012753	NaN	NaN	NaN	NaN	47.956	0.26238	50.09	49.861	50.124	2.1335								0	0	0
doa10Δ(H)/WT(L) Rep1	NIAFGIFYNSGEVCCAGSR	19	0	Unmodified	_NIAFGIFYNSGEVCCAGSR_					0	0	0	0	P40047	P40047	P40047	ALD5	Aldehyde dehydrogenase 5, mitochondrial	ISO-MSMS	-1	1061.99	2	1061.48	2120.94	NaN	NaN	NaN	0.24887	0.00026417	NaN	NaN	NaN	NaN	83.204	0.64894	85.438	85.061	85.71	2.2335								0	0	0
doa10Δ(H)/WT(L) Rep1	NIAFGIFYNSGEVCCAGSR	19	0	Unmodified	_NIAFGIFYNSGEVCCAGSR_					0	0	0	0	P40047	P40047	P40047	ALD5	Aldehyde dehydrogenase 5, mitochondrial	ISO-MSMS	-1	1061.98	2	1061.48	2120.94	NaN	NaN	NaN	0.20391	0.00021645	NaN	NaN	NaN	NaN	83.562	0.50891	85.795	85.622	86.131	2.2335								0	0	0
doa10Δ(H)/WT(L) Rep1	AGTVWINTYNDFDSR	15	0	Unmodified	_AGTVWINTYNDFDSR_					0	0	0	0	P54115	P54115	P54115	ALD6	Magnesium-activated aldehyde dehydrogenase, cytosolic	ISO-MSMS	-1	879.911	2	879.908	1757.8	NaN	NaN	NaN	-0.012305	-1.08e-05	NaN	NaN	NaN	NaN	72.137	0.76435	74.271	74.073	74.837	2.1334								0	0	0
doa10Δ(H)/WT(L) Rep1	AGTVWINTYNDFDSR	15	0	Unmodified	_AGTVWINTYNDFDSR_					0	0	0	0	P54115	P54115	P54115	ALD6	Magnesium-activated aldehyde dehydrogenase, cytosolic	ISO-MSMS	-1	879.912	2	879.908	1757.8	NaN	NaN	NaN	-0.33679	-0.00029635	NaN	NaN	NaN	NaN	72.76	0.10468	74.893	74.846	74.951	2.1334								0	0	0
doa10Δ(H)/WT(L) Rep1	ANFQGAITNR	10	0	Unmodified	_ANFQGAITNR_					0	0	0	0	P54115	P54115	P54115	ALD6	Magnesium-activated aldehyde dehydrogenase, cytosolic	ISO-MSMS	-1	546.286	2	546.283	1090.55	NaN	NaN	NaN	-0.30113	-0.0001645	NaN	NaN	NaN	NaN	32.062	0.42854	33.995	33.779	34.208	1.9329								0	0	0
doa10Δ(H)/WT(L) Rep1	DAAAYADKVNGR	12	1	Unmodified	_DAAAYADKVNGR_					0	0	0	1	P54115	P54115	P54115	ALD6	Magnesium-activated aldehyde dehydrogenase, cytosolic	MULTI-MSMS		625.815	2	625.81	1249.61	75389	5.4286	0.0033973	0.048475	3.03e-05	5.4771	0.0034276	625.81	629.817	26.054	0.25729	27.987	27.844	28.102	1.9329					64	26	4	0	0	0
doa10Δ(H)/WT(L) Rep1	DAAAYADKVNGR	12	1	Unmodified	_DAAAYADKVNGR_					0	0	0	1	P54115	P54115	P54115	ALD6	Magnesium-activated aldehyde dehydrogenase, cytosolic	MULTI-SECPEP		417.909	3	417.542	1249.61	92105.6	5.4573	0.0022786	0.61078	0.00025502	6.068	0.0025337	417.542	420.214	26.064	0.31647	27.997	27.827	28.144	1.9329					140	32	6	0	0	0
doa10Δ(H)/WT(L) Rep1	EMGEEVYHAYTEVK	14	1	Unmodified	_EMGEEVYHAYTEVK_					0	0	0	0	P54115	P54115	P54115	ALD6	Magnesium-activated aldehyde dehydrogenase, cytosolic	MULTI-MSMS		562.26	3	562.256	1683.75	77239.5	5.3899	0.0030305	-0.043996	-2.47e-05	5.3459	0.0030058	562.256	564.927	54.126	0.55403	56.159	55.835	56.389	2.0333					345	58	10	0	0	0
doa10Δ(H)/WT(L) Rep1	EMGEEVYHAYTEVK	14	1	Unmodified	_EMGEEVYHAYTEVK_					0	0	0	0	P54115	P54115	P54115	ALD6	Magnesium-activated aldehyde dehydrogenase, cytosolic	ISO-MSMS	0	562.258	3	562.256	1683.75	NaN	NaN	NaN	0.59471	0.00033438	NaN	NaN	NaN	NaN	53.872	0.03017	56.006	55.985	56.015	2.1335								0	0	0
doa10Δ(H)/WT(L) Rep1	EMGEEVYHAYTEVK	14	1	Oxidation (M)	_EM(ox)GEEVYHAYTEVK_					0	0	1	0	P54115	P54115	P54115	ALD6	Magnesium-activated aldehyde dehydrogenase, cytosolic	MULTI-MATCH			3	567.587	1699.74	77936.7	5.6563	0.0032104	0.1006	5.71e-05	5.7569	0.0032675	567.587	570.258	42.475	0.16631	44.508	44.493	44.66	2.0333	-0.34646	0.00042049	NaN	40.941	54	17	7	NaN	NaN	NaN
doa10Δ(H)/WT(L) Rep1	IAPALAMGNVCILKPAAVTPLNALYFASLCK	31	2	Unmodified	_IAPALAMGNVCILKPAAVTPLNALYFASLCK_					0	0	0	1	P54115	P54115	P54115	ALD6	Magnesium-activated aldehyde dehydrogenase, cytosolic	ISO-MSMS	0	1096.94	3	1096.6	3286.76	NaN	NaN	NaN	-0.65388	-0.00071704	NaN	NaN	NaN	NaN	108.38	0.64299	110.01	109.45	110.09	1.6322								0	0	0
doa10Δ(H)/WT(L) Rep1	IAPALAMGNVCILKPAAVTPLNALYFASLCK	31	2	Unmodified	_IAPALAMGNVCILKPAAVTPLNALYFASLCK_					0	0	0	1	P54115	P54115	P54115	ALD6	Magnesium-activated aldehyde dehydrogenase, cytosolic	ISO-MSMS	0	822.953	4	822.698	3286.76	NaN	NaN	NaN	-0.060201	-4.95e-05	NaN	NaN	NaN	NaN	108.56	0.62119	110.19	109.99	110.61	1.6322								0	0	0
doa10Δ(H)/WT(L) Rep1	IAPALAMGNVCILKPAAVTPLNALYFASLCK	31	2	Unmodified	_IAPALAMGNVCILKPAAVTPLNALYFASLCK_					0	0	0	1	P54115	P54115	P54115	ALD6	Magnesium-activated aldehyde dehydrogenase, cytosolic	ISO-MSMS	0	1096.94	3	1096.6	3286.76	NaN	NaN	NaN	-0.51815	-0.0005682	NaN	NaN	NaN	NaN	108.8	1.3912	110.44	110.09	111.48	1.6322								0	0	0
doa10Δ(H)/WT(L) Rep1	ILTGGEKVGDK	11	2	GlyGly (K)	_ILTGGEK(gl)VGDK_	ILTGGEK(0.94)VGDK(0.06)		ILTGGEK(11.91)VGDK(-11.91)		0	1	0	1	P54115	P54115	P54115	ALD6	Magnesium-activated aldehyde dehydrogenase, cytosolic	MULTI-MSMS		410.897	3	410.894	1229.66	95586.6	5.3655	0.0022046	0.39418	0.00016197	5.7596	0.0023666	410.895	416.237	18.886	0.4811	20.314	20.112	20.593	1.4278					141	50	5	0	0	0
doa10Δ(H)/WT(L) Rep1	ITLELGGK	8	1	Unmodified	_ITLELGGK_					0	0	0	0	P54115	P54115	P54115	ALD6	Magnesium-activated aldehyde dehydrogenase, cytosolic	MULTI-MATCH			2	415.753	829.491	95031.7	5.3505	0.0022245	-0.1151	-4.79e-05	5.2354	0.0021766	415.753	419.76	46.804	0.4049	48.837	48.637	49.042	2.0333	0.2608	-0.00018864	NaN	67.897	123	41	4	NaN	NaN	NaN
doa10Δ(H)/WT(L) Rep1	ITLPNGLTYEQPTGLFINNKFMK	23	2	GlyGly (K)	_ITLPNGLTYEQPTGLFINNKFMK(gl)_	ITLPNGLTYEQPTGLFINNK(0.449)FMK(0.551)		ITLPNGLTYEQPTGLFINNK(-0.89)FMK(0.89)		0	1	0	1	P54115	P54115	P54115	ALD6	Magnesium-activated aldehyde dehydrogenase, cytosolic	MULTI-MSMS		918.821	3	918.483	2752.43	62830.8	5.4778	0.0050313	0.070709	6.49e-05	5.5485	0.0050962	918.817	924.16	90.589	0.65637	92.722	92.262	92.919	2.1332					417	69	9	0	0	0
doa10Δ(H)/WT(L) Rep1	ITLPNGLTYEQPTGLFINNKFMK	23	2	GlyGly (K)	_ITLPNGLTYEQPTGLFINNKFMK(gl)_	ITLPNGLTYEQPTGLFINNK(0.206)FMK(0.794)		ITLPNGLTYEQPTGLFINNK(-5.85)FMK(5.85)		0	1	0	1	P54115	P54115	P54115	ALD6	Magnesium-activated aldehyde dehydrogenase, cytosolic	MULTI-MSMS		924.501	3	918.483	2752.43	62927.4	5.5366	0.0050852	-0.43412	-0.00039873	5.1024	0.0046865	918.817	924.159	91.05	0.47474	93.183	93.038	93.513	2.1332					173	52	5	0	0	0
doa10Δ(H)/WT(L) Rep1	IVKEEIFGPVVTVAK	15	2	Unmodified	_IVKEEIFGPVVTVAK_					0	0	0	1	P54115	P54115	P54115	ALD6	Magnesium-activated aldehyde dehydrogenase, cytosolic	MULTI-MATCH			3	543.659	1627.95	83469.2	5.7154	0.0031072	-0.16119	-8.76e-05	5.5542	0.0030196	543.993	549.002	61.561	0.26234	63.694	63.66	63.923	2.1335	0.68889	-0.00067116	NaN	31.043	63	27	5	NaN	NaN	NaN
doa10Δ(H)/WT(L) Rep1	KLAFTGSTEVGK	12	2	Unmodified	_KLAFTGSTEVGK_					0	0	0	1	P54115	P54115	P54115	ALD6	Magnesium-activated aldehyde dehydrogenase, cytosolic	MULTI-MSMS		413.233	3	413.231	1236.67	92297.1	5.1565	0.0021308	-0.35359	-0.00014611	4.8029	0.0019847	413.231	418.574	32.072	0.82307	34.005	33.71	34.534	1.9329					340	98	8	0	0	0
doa10Δ(H)/WT(L) Rep1	KLAFTGSTEVGK	12	2	Unmodified	_KLAFTGSTEVGK_					0	0	0	1	P54115	P54115	P54115	ALD6	Magnesium-activated aldehyde dehydrogenase, cytosolic	MULTI-MATCH			2	619.343	1236.67	76680.2	5.1149	0.0031679	0.39891	0.00024706	5.5138	0.003415	619.343	627.357	32.079	0.57952	34.012	33.739	34.318	1.9329	0.17526	3.48e-05	NaN	82.705	202	68	4	NaN	NaN	NaN
doa10Δ(H)/WT(L) Rep1	MLKAGTVWINTYNDFDSR	18	1	GlyGly (K)	_MLK(gl)AGTVWINTYNDFDSR_	MLK(1)AGTVWINTYNDFDSR		MLK(59.37)AGTVWINTYNDFDSR		0	1	0	1	P54115	P54115	P54115	ALD6	Magnesium-activated aldehyde dehydrogenase, cytosolic	MULTI-MSMS		752.039	3	749.028	2244.06	66956.5	5.8993	0.0044187	-0.93261	-0.00069855	4.9667	0.0037202	749.362	752.033	74.275	0.31516	76.509	76.394	76.71	2.2335					208	32	9	0	0	0
doa10Δ(H)/WT(L) Rep1	NAGQICSSGSR	11	0	Unmodified	_NAGQICSSGSR_					0	0	0	0	P54115	P54115	P54115	ALD6	Magnesium-activated aldehyde dehydrogenase, cytosolic	ISO-MSMS	-1	568.762	2	568.759	1135.5	NaN	NaN	NaN	-0.46987	-0.00026725	NaN	NaN	NaN	NaN	11.493	0.39415	12.423	12.196	12.59	0.93061								0	0	0
doa10Δ(H)/WT(L) Rep1	SAHLVFDDANIKK	13	2	Unmodified	_SAHLVFDDANIKK_					0	0	0	1	P54115	P54115	P54115	ALD6	Magnesium-activated aldehyde dehydrogenase, cytosolic	MULTI-MSMS		486.599	3	486.596	1456.77	86951.4	5.4394	0.0026468	-0.028939	-1.41e-05	5.4104	0.0026327	486.596	492.273	36.99	1.0101	38.923	38.517	39.527	1.933					256	118	5	0	0	0
doa10Δ(H)/WT(L) Rep1	SVAVDSSESNLK	12	1	Unmodified	_SVAVDSSESNLK_					0	0	0	0	P54115	P54115	P54115	ALD6	Magnesium-activated aldehyde dehydrogenase, cytosolic	MULTI-MSMS		622.32	2	618.309	1234.6	75789.3	5.2469	0.0032442	-0.64797	-0.00040065	4.5989	0.0028435	618.309	622.316	25.694	0.38176	27.526	27.345	27.727	1.8327					201	37	8	0	0	0
doa10Δ(H)/WT(L) Rep1	SVAVDSSESNLKK	13	2	Unmodified	_SVAVDSSESNLKK_					0	0	0	1	P54115	P54115	P54115	ALD6	Magnesium-activated aldehyde dehydrogenase, cytosolic	MULTI-MSMS		455.243	3	455.24	1362.7	89651.2	5.4475	0.0024799	0.47082	0.00021434	5.9183	0.0026943	455.241	460.583	19.111	0.68237	20.542	20.197	20.879	1.4318					477	70	10	0	0	0
doa10Δ(H)/WT(L) Rep1	SVAVDSSESNLKK	13	2	Unmodified	_SVAVDSSESNLKK_					0	0	0	1	P54115	P54115	P54115	ALD6	Magnesium-activated aldehyde dehydrogenase, cytosolic	MULTI-MATCH			2	682.357	1362.7	73187.5	5.6587	0.0038613	0.31761	0.00021672	5.9763	0.004078	682.357	690.371	19.084	0.48292	20.516	20.285	20.768	1.4318	-0.12937	0.00055072	NaN	75.89	256	47	8	NaN	NaN	NaN
doa10Δ(H)/WT(L) Rep1	TKLHFDTAEPVK	12	2	Unmodified	_TKLHFDTAEPVK_					0	0	0	1	P54115	P54115	P54115	ALD6	Magnesium-activated aldehyde dehydrogenase, cytosolic	MULTI-MSMS		467.931	3	462.586	1384.74	87891.1	5.082	0.0023508	-0.067248	-3.11e-05	5.0147	0.0023197	462.586	467.928	30.643	1.122	32.576	32.218	33.34	1.9329					469	114	7	0	0	0
doa10Δ(H)/WT(L) Rep1	TKLHFDTAEPVK	12	2	GlyGly (K)	_TK(gl)LHFDTAEPVK_	TK(1)LHFDTAEPVK		TK(67.19)LHFDTAEPVK(-67.19)		0	1	0	1	P54115	P54115	P54115	ALD6	Magnesium-activated aldehyde dehydrogenase, cytosolic	MULTI-MSMS		500.602	3	500.6	1498.78	84278	5.1863	0.0025963	-0.10091	-5.05e-05	5.0854	0.0025457	500.6	505.943	32.323	1.6513	34.356	33.746	35.397	2.0331					976	190	9	0	0	0
doa10Δ(H)/WT(L) Rep1	TKLHFDTAEPVK	12	2	GlyGly (K)	_TK(gl)LHFDTAEPVK_					0	1	0	1	P54115	P54115	P54115	ALD6	Magnesium-activated aldehyde dehydrogenase, cytosolic	MULTI-MATCH			3	500.6	1498.78	82858.1	5.125	0.0025656	0.76588	0.0003834	5.8909	0.002949	500.6	505.943	33.678	0.38491	35.711	35.551	35.936	2.0331	1.7	0.0013029	NaN	131.06	78	37	5	NaN	NaN	NaN
doa10Δ(H)/WT(L) Rep1	TKLHFDTAEPVKITLPNGLTYEQPTGLFINNK	32	3	GlyGly (K)	_TK(gl)LHFDTAEPVKITLPNGLTYEQPTGLFINNK_	TK(0.995)LHFDTAEPVK(0.005)ITLPNGLTYEQPTGLFINNK		TK(23.29)LHFDTAEPVK(-23.29)ITLPNGLTYEQPTGLFINNK(-43.81)		0	1	0	2	P54115	P54115	P54115	ALD6	Magnesium-activated aldehyde dehydrogenase, cytosolic	ISO-MSMS	0	744.203	5	743.597	3712.95	NaN	NaN	NaN	-0.10362	-7.71e-05	NaN	NaN	NaN	NaN	85.506	0.21117	87.739	87.614	87.825	2.2335								0	0	0
doa10Δ(H)/WT(L) Rep1	TLPNLVNGIFK	11	1	Unmodified	_TLPNLVNGIFK_					0	0	0	0	P54115	P54115	P54115	ALD6	Magnesium-activated aldehyde dehydrogenase, cytosolic	MULTI-MSMS		612.369	2	608.358	1214.7	77193.8	5.2265	0.0031796	-0.36085	-0.00021952	4.8657	0.0029601	608.358	612.365	82.233	1.9434	84.466	83.866	85.81	2.2335					1307	207	10	0	0	0
doa10Δ(H)/WT(L) Rep1	TVGAALTNDPR	11	0	Unmodified	_TVGAALTNDPR_					0	0	0	0	P54115	P54115	P54115	ALD6	Magnesium-activated aldehyde dehydrogenase, cytosolic	ISO-MSMS	-1	557.798	2	557.796	1113.58	NaN	NaN	NaN	-0.50383	-0.00028104	NaN	NaN	NaN	NaN	28.668	0.89103	30.6	30.221	31.112	1.9329								0	0	0
doa10Δ(H)/WT(L) Rep1	VGNPFDKANFQGAITNR	17	1	GlyGly (K)	_VGNPFDK(gl)ANFQGAITNR_	VGNPFDK(1)ANFQGAITNR		VGNPFDK(58.46)ANFQGAITNR		0	1	0	1	P54115	P54115	P54115	ALD6	Magnesium-activated aldehyde dehydrogenase, cytosolic	MULTI-MSMS		657.673	3	654.998	1961.97	74508	5.7866	0.0037902	0.11586	7.59e-05	5.9024	0.0038661	655.332	658.003	60.281	0.8682	62.415	62.016	62.884	2.1335					512	89	8	0	0	0
doa10Δ(H)/WT(L) Rep1	VPFGGVKQSGYGR	13	1	GlyGly (K)	_VPFGGVK(gl)QSGYGR_	VPFGGVK(1)QSGYGR		VPFGGVK(128.36)QSGYGR		0	1	0	1	P54115	P54115	P54115	ALD6	Magnesium-activated aldehyde dehydrogenase, cytosolic	MULTI-MSMS		491.932	3	489.256	1464.75	85852.7	5.0279	0.0024599	0.55528	0.00027167	5.5832	0.0027316	489.257	492.262	34.328	0.74255	36.362	36.182	36.925	2.0331					400	88	7	0	0	0
doa10Δ(H)/WT(L) Rep1	VPFGGVKQSGYGR	13	1	GlyGly (K)	_VPFGGVK(gl)QSGYGR_					0	1	0	1	P54115	P54115	P54115	ALD6	Magnesium-activated aldehyde dehydrogenase, cytosolic	MULTI-MATCH			3	489.256	1464.75	85852.8	5.2711	0.0025789	0.98007	0.0004795	6.2511	0.0030584	489.257	492.263	34.923	0.12602	36.956	36.878	37.004	2.0331	0.36093	-9.45e-05	NaN	81.676	34	13	5	NaN	NaN	NaN
doa10Δ(H)/WT(L) Rep1	VPFGGVKQSGYGR	13	1	GlyGly (K)	_VPFGGVK(gl)QSGYGR_					0	1	0	1	P54115	P54115	P54115	ALD6	Magnesium-activated aldehyde dehydrogenase, cytosolic	MULTI-MATCH			3	489.256	1464.75	85885.5	4.9751	0.0024341	1.4526	0.0007107	6.4278	0.0031448	489.257	491.929	34.127	0.35016	36.16	35.824	36.174	2.0331	-0.011895	0.00027396	NaN	77.74	236	36	8	NaN	NaN	NaN
doa10Δ(H)/WT(L) Rep1	IIIFVLGDVGHSPR	14	0	Unmodified	_IIIFVLGDVGHSPR_					0	0	0	0	P16661	P16661	P16661	ALG1	Chitobiosyldiphosphodolichol beta-mannosyltransferase	ISO-MSMS	-1	508.633	3	508.296	1521.87	NaN	NaN	NaN	-0.062415	-3.17e-05	NaN	NaN	NaN	NaN	79.647	0.61392	81.881	81.666	82.28	2.2335								0	0	0
doa10Δ(H)/WT(L) Rep1	KNSSIASTSSENR	13	1	GlyGly (K)	_K(gl)NSSIASTSSENR_	K(1)NSSIASTSSENR		K(53.95)NSSIASTSSENR		0	1	0	1	P43633	P43633	P43633	ALK1	Serine/threonine-protein kinase Haspin homolog ALK1	MULTI-MSMS		501.584	3	498.91	1493.71	85644.6	5.1992	0.0025939	-0.085249	-4.25e-05	5.1139	0.0025514	499.244	501.581	9.4751	0.25265	10.306	10.191	10.444	0.83037					87	25	5	0	0	0
doa10Δ(H)/WT(L) Rep1	FAPLDKVTLHR	11	1	GlyGly (K)	_FAPLDK(gl)VTLHR_	FAPLDK(1)VTLHR		FAPLDK(86.01)VTLHR		0	1	0	1	P47029	P47029	P47029	ALY2	Arrestin-related trafficking adapter 3	MULTI-MSMS		470.935	3	470.933	1409.78	87383.4	4.876	0.0022963	1.088	0.00051237	5.964	0.0028086	470.934	473.605	49.352	0.49215	51.485	51.181	51.673	2.1335					263	55	7	0	0	0
doa10Δ(H)/WT(L) Rep1	FAPLDKVTLHR	11	1	GlyGly (K)	_FAPLDK(gl)VTLHR_	FAPLDK(1)VTLHR		FAPLDK(81.02)VTLHR		0	1	0	1	P47029	P47029	P47029	ALY2	Arrestin-related trafficking adapter 3	MULTI-MSMS		470.937	3	470.933	1409.78	87134.9	5.0941	0.002399	0.92466	0.00043545	6.0187	0.0028344	470.934	473.605	49.6	0.39249	51.733	51.576	51.968	2.1335					196	31	8	0	0	0
doa10Δ(H)/WT(L) Rep1	FAPLDKVTLHR	11	1	GlyGly (K)	_FAPLDK(gl)VTLHR_	FAPLDK(1)VTLHR		FAPLDK(91.55)VTLHR		0	1	0	1	P47029	P47029	P47029	ALY2	Arrestin-related trafficking adapter 3	MSMS	0	470.909	3	470.933	1409.78	NaN	NaN	NaN	NaN	NaN	NaN	NaN	NaN	NaN	48.838	1	50.971	50.471	51.471	2.1335								0	0	0
doa10Δ(H)/WT(L) Rep1	FAPLDKVTLHR	11	1	GlyGly (K)	_FAPLDK(gl)VTLHR_	FAPLDK(1)VTLHR		FAPLDK(79.2)VTLHR		0	1	0	1	P47029	P47029	P47029	ALY2	Arrestin-related trafficking adapter 3	MSMS	0	470.936	3	470.933	1409.78	NaN	NaN	NaN	NaN	NaN	NaN	NaN	NaN	NaN	50.169	1	52.302	51.802	52.802	2.1335								0	0	0
doa10Δ(H)/WT(L) Rep1	FAPLDKVTLHR	11	1	GlyGly (K)	_FAPLDK(gl)VTLHR_					0	1	0	1	P47029	P47029	P47029	ALY2	Arrestin-related trafficking adapter 3	MULTI-MATCH			3	470.933	1409.78	87496.1	4.4646	0.0021025	0.63064	0.00029699	5.0953	0.0023995	470.933	473.939	48.95	0.2143	51.083	50.993	51.207	2.1335	0.02209	0.00020616	NaN	91.549	97	27	6	NaN	NaN	NaN
doa10Δ(H)/WT(L) Rep1	LKSNIYQPESLQR	13	1	GlyGly (K)	_LK(gl)SNIYQPESLQR_	LK(1)SNIYQPESLQR		LK(41.23)SNIYQPESLQR		0	1	0	1	P47029	P47029	P47029	ALY2	Arrestin-related trafficking adapter 3	MULTI-SECPEP		566.644	3	563.969	1688.88	77024	5.1932	0.0029288	0.053078	2.99e-05	5.2463	0.0029588	563.969	566.975	38.03	0.50381	39.963	39.742	40.246	1.933					112	53	4	0	0	0
doa10Δ(H)/WT(L) Rep1	HMVFYNSGPASGSSLDHK	18	1	Unmodified	_HMVFYNSGPASGSSLDHK_					0	0	0	0	P16550	P16550	P16550	APA1	Protein APA1;5,5-P-1,P-4-tetraphosphate phosphorylase;ADP-sulfurylase	MULTI-MSMS		645.638	3	645.3	1932.88	75940.2	5.4767	0.0035341	0.53504	0.00034526	6.0117	0.0038794	645.634	647.972	37.961	0.17354	39.894	39.824	39.998	1.933					37	18	4	0	0	0
doa10Δ(H)/WT(L) Rep1	HMVFYNSGPASGSSLDHK	18	1	Unmodified	_HMVFYNSGPASGSSLDHK_					0	0	0	0	P16550	P16550	P16550	APA1	Protein APA1;5,5-P-1,P-4-tetraphosphate phosphorylase;ADP-sulfurylase	MULTI-SECPEP		647.397	3	645.3	1932.88	75020.9	5.4464	0.0035146	0.56082	0.0003619	6.0072	0.0038765	645.635	648.306	38.115	0.18208	40.048	39.952	40.134	1.933					51	18	5	0	0	0
doa10Δ(H)/WT(L) Rep1	IGFNSTGYCGMILTK	15	1	Unmodified	_IGFNSTGYCGMILTK_					0	0	0	0	P16550	P16550	P16550	APA1	Protein APA1;5,5-P-1,P-4-tetraphosphate phosphorylase;ADP-sulfurylase	MULTI-MATCH			2	831.405	1660.8	68412.1	5.9194	0.0049214	0.090084	7.49e-05	6.0095	0.0049963	831.906	835.412	71.876	0.33465	74.009	73.85	74.185	2.1334	0.013853	-0.00047264	NaN	45.873	81	37	4	NaN	NaN	NaN
doa10Δ(H)/WT(L) Rep1	TSMPYLISHMPSLIEKPER	19	1	Unmodified	_TSMPYLISHMPSLIEKPER_					0	0	0	1	P16550	P16550	P16550	APA1	Protein APA1;5,5-P-1,P-4-tetraphosphate phosphorylase;ADP-sulfurylase	MULTI-MATCH			4	558.041	2228.13	78479	5.7568	0.0032126	-1.1513	-0.00064247	4.6055	0.0025701	558.04	560.294	79.584	0.40717	81.818	81.549	81.956	2.2335	-0.4169	-0.001202	NaN	32.366	136	43	7	NaN	NaN	NaN
doa10Δ(H)/WT(L) Rep1	TSMPYLISHMPSLIEKPER	19	1	Unmodified	_TSMPYLISHMPSLIEKPER_					0	0	0	1	P16550	P16550	P16550	APA1	Protein APA1;5,5-P-1,P-4-tetraphosphate phosphorylase;ADP-sulfurylase	MULTI-MATCH			4	558.041	2228.13	79734.6	5.7881	0.00323	-0.91549	-0.00051088	4.8726	0.0027191	558.04	560.295	79.929	0.44011	82.162	81.938	82.378	2.2335	0.1135	-0.0016422	NaN	77.13	142	46	6	NaN	NaN	NaN
doa10Δ(H)/WT(L) Rep1	TFGIQYPLPK	10	1	Unmodified	_TFGIQYPLPK_					0	0	0	0	P32454	P32454	P32454	APE2	Aminopeptidase 2, mitochondrial	MULTI-MSMS		586.337	2	582.327	1162.64	80376.4	5.323	0.0030997	-0.18568	-0.00010813	5.1373	0.0029916	582.326	586.333	66.359	0.57936	68.492	68.279	68.859	2.1334					298	63	6	0	0	0
doa10Δ(H)/WT(L) Rep1	TIELEDPTFFK	11	1	Unmodified	_TIELEDPTFFK_					0	0	0	0	P32454	P32454	P32454	APE2	Aminopeptidase 2, mitochondrial	MULTI-MATCH			3	447.231	1338.67	91094.4	5.3018	0.0023711	1.1304	0.00050555	6.4322	0.0028767	447.231	449.903	46.779	0.6682	48.813	48.41	49.079	2.0333	0.094913	-8.67e-06	NaN	31.068	314	69	6	NaN	NaN	NaN
doa10Δ(H)/WT(L) Rep1	TLAFFEK	7	1	Unmodified	_TLAFFEK_					0	0	0	0	P32454	P32454	P32454	APE2	Aminopeptidase 2, mitochondrial	MULTI-MATCH			2	428.234	854.454	93157.9	5.2921	0.0022662	1.1547	0.00049446	6.4467	0.0027607	428.234	432.241	58.76	0.70344	60.793	60.479	61.182	2.0333	-0.40929	0.00040137	NaN	65.252	218	75	5	NaN	NaN	NaN
doa10Δ(H)/WT(L) Rep1	FGFTAVVIYDNEPK	14	1	Unmodified	_FGFTAVVIYDNEPK_					0	0	0	0	P37302	P37302	P37302	APE3	Aminopeptidase Y	MULTI-MSMS		804.42	2	800.406	1598.8	68208.4	5.4496	0.0043619	0.40939	0.00032768	5.859	0.0046896	800.907	804.414	82.182	0.27158	84.416	84.227	84.498	2.2335					57	28	4	0	0	0
doa10Δ(H)/WT(L) Rep1	FGFTAVVIYDNEPK	14	1	Unmodified	_FGFTAVVIYDNEPK_					0	0	0	0	P37302	P37302	P37302	APE3	Aminopeptidase Y	MULTI-MSMS		800.913	2	800.406	1598.8	67320.9	5.5465	0.0044395	0.58332	0.0004669	6.1298	0.0049064	800.908	804.413	83.084	0.69411	85.317	84.908	85.602	2.2335					256	72	6	0	0	0
doa10Δ(H)/WT(L) Rep1	FGFTAVVIYDNEPK	14	1	Unmodified	_FGFTAVVIYDNEPK_					0	0	0	0	P37302	P37302	P37302	APE3	Aminopeptidase Y	MULTI-MSMS		800.411	2	800.406	1598.8	67920.2	5.6581	0.0045288	0.66993	0.00053622	6.328	0.005065	800.908	804.413	83.55	0.48347	85.784	85.513	85.997	2.2335					174	48	6	0	0	0
doa10Δ(H)/WT(L) Rep1	FGFTAVVIYDNEPK	14	1	Unmodified	_FGFTAVVIYDNEPK_					0	0	0	0	P37302	P37302	P37302	APE3	Aminopeptidase Y	ISO-MSMS	1	804.417	2	800.406	1598.8	NaN	NaN	NaN	0.099397	7.96e-05	NaN	NaN	NaN	NaN	82.445	0.29504	84.679	84.489	84.784	2.2335								0	0	0
doa10Δ(H)/WT(L) Rep1	FGFTAVVIYDNEPK	14	1	Unmodified	_FGFTAVVIYDNEPK_					0	0	0	0	P37302	P37302	P37302	APE3	Aminopeptidase Y	ISO-MSMS	1	804.919	2	800.406	1598.8	NaN	NaN	NaN	0.81663	0.00065363	NaN	NaN	NaN	NaN	84.549	0.25821	86.783	86.67	86.928	2.2335								0	0	0
doa10Δ(H)/WT(L) Rep1	NLYVDYYK	8	1	Unmodified	_NLYVDYYK_					0	0	0	0	P37302	P37302	P37302	APE3	Aminopeptidase Y	MULTI-MSMS		539.269	2	539.266	1076.52	81154.6	5.5655	0.0030013	-0.099551	-5.37e-05	5.466	0.0029476	539.266	543.273	50.646	0.61545	52.78	52.403	53.018	2.1335					281	63	6	0	0	0
doa10Δ(H)/WT(L) Rep1	VVSLLSILIASPTER	15	0	Unmodified	_VVSLLSILIASPTER_					0	0	0	0	P38065	P38065	P38065	APL3	AP-2 complex subunit alpha	ISO-MSMS	-1	799.984	2	799.48	1596.95	NaN	NaN	NaN	-0.21543	-0.00017223	NaN	NaN	NaN	NaN	107.78	0.37143	109.41	109.22	109.59	1.6322								0	0	0
doa10Δ(H)/WT(L) Rep1	LLYLYILGEK	10	1	Unmodified	_LLYLYILGEK_					0	0	0	0	Q12028	Q12028	Q12028	APL4	AP-1 complex subunit gamma-1	MULTI-MSMS		613.37	2	612.866	1223.72	79482.5	5.3512	0.0032796	-0.4163	-0.00025514	4.9349	0.0030244	612.865	616.873	91.577	0.51126	93.71	93.549	94.061	2.1332					113	57	4	0	0	0
doa10Δ(H)/WT(L) Rep1	MISSLFDSGKYEIVSLLLQAPKPTAR	26	2	Unmodified	_MISSLFDSGKYEIVSLLLQAPKPTAR_					0	0	0	2	P46682	P46682	P46682	APL6	AP-3 complex subunit beta	MULTI-MATCH			4	716.895	2863.55	71333.4	5.4553	0.0039108	0.034128	2.45e-05	5.4894	0.0039353	717.146	721.153	106.3	0.29449	108.03	107.84	108.13	1.7324	-0.16516	-0.0018189	NaN	40.098	72	31	5	NaN	NaN	NaN
doa10Δ(H)/WT(L) Rep1	AVQFILCFNK	10	1	Unmodified	_AVQFILCFNK_					0	0	0	0	Q00381	Q00381	Q00381	APS2	AP-2 complex subunit sigma	MULTI-MATCH			2	620.331	1238.65	75724.4	5.448	0.0033796	1.1836	0.00073421	6.6316	0.0041138	620.332	624.339	78.293	0.70979	80.527	80.182	80.891	2.2335	0.1769	0.00012752	NaN	81.525	196	70	5	NaN	NaN	NaN
doa10Δ(H)/WT(L) Rep1	MIHAVLIFNKK	11	2	Unmodified	_MIHAVLIFNKK_					0	0	0	1	P47064	P47064	P47064	APS3	AP-3 complex subunit sigma	MULTI-MATCH			3	438.597	1312.77	92280.3	5.1721	0.0022685	-0.45769	-0.00020074	4.7144	0.0020677	438.597	443.94	45.602	0.19204	47.635	47.521	47.713	2.0333	0.23163	-0.00035055	NaN	96.143	62	23	5	NaN	NaN	NaN
doa10Δ(H)/WT(L) Rep1	MIHAVLIFNKK	11	2	Unmodified	_MIHAVLIFNKK_					0	0	0	1	P47064	P47064	P47064	APS3	AP-3 complex subunit sigma	MULTI-MATCH			3	438.597	1312.77	92463.2	5.1703	0.0022677	-0.097981	-4.3e-05	5.0723	0.0022247	438.597	443.94	45.329	0.54496	47.362	46.961	47.506	2.0333	0.17109	3.77e-06	NaN	56.632	167	60	4	NaN	NaN	NaN
doa10Δ(H)/WT(L) Rep1	MSIASYAQELKLALHQYPNFPSEGILFEDFLPIFR	35	1	Unmodified	_MSIASYAQELKLALHQYPNFPSEGILFEDFLPIFR_					0	0	0	1	P49435	P49435	P49435	APT1	Adenine phosphoribosyltransferase 1	MULTI-MATCH			6	681.687	4084.08	70849.5	5.6585	0.0038573	-2.4228	-0.0016516	3.2356	0.0022057	681.853	683.355	90.747	0.22659	92.881	92.747	92.973	2.1332	-0.098235	-0.0020124	NaN	10.212	198	23	13	NaN	NaN	NaN
doa10Δ(H)/WT(L) Rep1	EYTKPDGQTK	10	2	GlyGly (K)	_EYTK(gl)PDGQTK_	EYTK(1)PDGQTK		EYTK(52.22)PDGQTK(-52.22)		0	1	0	1	P53943	P53943	P53943	AQR1	Probable transporter AQR1	MULTI-SECPEP		428.23	3	427.542	1279.6	93281.3	5.0857	0.0021744	0.38139	0.00016306	5.4671	0.0023374	427.542	432.885	13.11	0.63683	14.241	13.86	14.496	1.1311					249	63	6	0	0	0
doa10Δ(H)/WT(L) Rep1	EYTKPDGQTKSEK	13	3	GlyGly (K)	_EYTKPDGQTK(gl)SEK_	EYTKPDGQTK(0.989)SEK(0.011)		EYTK(-36.99)PDGQTK(19.42)SEK(-19.42)		0	1	0	2	P53943	P53943	P53943	AQR1	Probable transporter AQR1	MULTI-SECPEP		542.296	3	542.265	1623.77	79914.8	5.3482	0.0029001	0.84322	0.00045725	6.1914	0.0033574	542.6	550.28	9.5108	0.31207	10.341	10.191	10.503	0.83037					141	31	6	0	0	0
doa10Δ(H)/WT(L) Rep1	EYTKPDGQTKSEK	13	3	2 GlyGly (K)	_EYTK(gl)PDGQTK(gl)SEK_					0	2	0	2	P53943	P53943	P53943	AQR1	Probable transporter AQR1	MULTI-MATCH			4	435.462	1737.82	89765.8	5.1017	0.0022216	0.23678	0.00010311	5.3385	0.0023247	435.712	441.472	12.391	0.46695	13.422	13.328	13.795	1.0309	-0.36481	0.00063826	NaN	43.761	141	50	6	NaN	NaN	NaN
doa10Δ(H)/WT(L) Rep1	EYTKPDGQTKSEK	13	3	2 GlyGly (K)	_EYTK(gl)PDGQTK(gl)SEK_					0	2	0	2	P53943	P53943	P53943	AQR1	Probable transporter AQR1	MULTI-MATCH			4	435.462	1737.82	90212.9	5.0503	0.0021992	-0.9553	-0.000416	4.095	0.0017832	435.462	441.472	12.192	0.67016	13.223	12.749	13.419	1.0309	-0.12685	-0.0014981	NaN	68.171	292	74	7	NaN	NaN	NaN
doa10Δ(H)/WT(L) Rep1	SEKLNFEGAYINSHGTLSK	19	2	GlyGly (K)	_SEK(gl)LNFEGAYINSHGTLSK_	SEK(1)LNFEGAYINSHGTLSK		SEK(33.16)LNFEGAYINSHGTLSK(-33.16)		0	1	0	1	P53943	P53943	P53943	AQR1	Probable transporter AQR1	MULTI-MSMS		553.28	4	553.028	2208.08	77644.3	5.4741	0.0030273	-0.13966	-7.72e-05	5.3345	0.0029501	553.278	557.035	50.955	0.17397	53.089	53.008	53.182	2.1335					47	17	5	0	0	0
doa10Δ(H)/WT(L) Rep1	SEKLNFEGAYINSHGTLSK	19	2	GlyGly (K)	_SEK(gl)LNFEGAYINSHGTLSK_	SEK(1)LNFEGAYINSHGTLSK		SEK(58.46)LNFEGAYINSHGTLSK(-58.46)		0	1	0	1	P53943	P53943	P53943	AQR1	Probable transporter AQR1	MULTI-MSMS		553.282	4	553.028	2208.08	77644.3	5.4914	0.0030369	0.1426	7.89e-05	5.634	0.0031158	553.529	557.285	51.61	0.40623	53.744	53.517	53.923	2.1335					199	43	7	0	0	0
doa10Δ(H)/WT(L) Rep1	FCFMHDILLTAYSPLGSHGAPNLK	24	1	Oxidation (M)	_FCFM(ox)HDILLTAYSPLGSHGAPNLK_		FCFM(1)HDILLTAYSPLGSHGAPNLK		FCFM(59.86)HDILLTAYSPLGSHGAPNLK	0	0	1	0	P38115	P38115	P38115	ARA1	D-arabinose dehydrogenase [NAD(P)+] heavy chain	MULTI-MSMS		679.344	4	677.086	2704.31	71895.7	5.7588	0.0038992	-0.6086	-0.00041207	5.1502	0.0034871	677.336	679.59	80.665	0.56869	82.899	82.591	83.16	2.2335					273	59	9	0	0	0
doa10Δ(H)/WT(L) Rep1	FCFMHDILLTAYSPLGSHGAPNLK	24	1	Unmodified	_FCFMHDILLTAYSPLGSHGAPNLK_					0	0	0	0	P38115	P38115	P38115	ARA1	D-arabinose dehydrogenase [NAD(P)+] heavy chain	MULTI-MSMS		675.346	4	673.087	2688.32	72179.6	5.5823	0.0037574	0.2956	0.00019896	5.8779	0.0039563	673.338	675.342	91.352	0.65932	93.486	92.946	93.605	2.1332					465	72	10	0	0	0
doa10Δ(H)/WT(L) Rep1	FCFMHDILLTAYSPLGSHGAPNLK	24	1	Unmodified	_FCFMHDILLTAYSPLGSHGAPNLK_					0	0	0	0	P38115	P38115	P38115	ARA1	D-arabinose dehydrogenase [NAD(P)+] heavy chain	MULTI-MSMS		897.453	3	897.114	2688.32	63026.8	5.5617	0.0049895	0.59184	0.00053095	6.1535	0.0055204	897.449	900.12	91.299	0.45842	93.432	93.147	93.605	2.1332					207	50	6	0	0	0
doa10Δ(H)/WT(L) Rep1	FCFMHDILLTAYSPLGSHGAPNLK	24	1	Unmodified	_FCFMHDILLTAYSPLGSHGAPNLK_					0	0	0	0	P38115	P38115	P38115	ARA1	D-arabinose dehydrogenase [NAD(P)+] heavy chain	MULTI-MSMS		673.34	4	673.087	2688.32	72244.4	5.566	0.0037464	-0.58537	-0.000394	4.9806	0.0033524	673.338	675.341	91.72	0.23389	93.854	93.736	93.97	2.1332					161	26	12	0	0	0
doa10Δ(H)/WT(L) Rep1	FCFMHDILLTAYSPLGSHGAPNLK	24	1	Unmodified	_FCFMHDILLTAYSPLGSHGAPNLK_					0	0	0	0	P38115	P38115	P38115	ARA1	D-arabinose dehydrogenase [NAD(P)+] heavy chain	MULTI-MSMS		897.455	3	897.114	2688.32	63176.5	5.5528	0.0049815	0.25665	0.00023024	5.8094	0.0052117	897.449	899.785	92.014	0.57851	94.147	93.842	94.42	2.1332					181	63	6	0	0	0
doa10Δ(H)/WT(L) Rep1	FCFMHDILLTAYSPLGSHGAPNLK	24	1	Unmodified	_FCFMHDILLTAYSPLGSHGAPNLK_					0	0	0	0	P38115	P38115	P38115	ARA1	D-arabinose dehydrogenase [NAD(P)+] heavy chain	MULTI-MSMS		675.346	4	673.087	2688.32	72244.4	5.5761	0.0037532	-0.18569	-0.00012498	5.3904	0.0036282	673.588	675.342	92.001	0.58371	94.134	93.908	94.492	2.1332					356	63	12	0	0	0
doa10Δ(H)/WT(L) Rep1	FCFMHDILLTAYSPLGSHGAPNLK	24	1	Unmodified	_FCFMHDILLTAYSPLGSHGAPNLK_					0	0	0	0	P38115	P38115	P38115	ARA1	D-arabinose dehydrogenase [NAD(P)+] heavy chain	MULTI-MSMS		675.345	4	673.087	2688.32	72179.5	5.7815	0.0038914	-0.59732	-0.00040205	5.1842	0.0034894	673.337	675.341	92.674	0.66277	94.807	94.605	95.267	2.1332					346	69	10	0	0	0
doa10Δ(H)/WT(L) Rep1	FCFMHDILLTAYSPLGSHGAPNLK	24	1	Unmodified	_FCFMHDILLTAYSPLGSHGAPNLK_					0	0	0	0	P38115	P38115	P38115	ARA1	D-arabinose dehydrogenase [NAD(P)+] heavy chain	MULTI-MSMS		673.342	4	673.087	2688.32	72228	5.8354	0.0039277	-0.12931	-8.7e-05	5.7061	0.0038407	673.338	675.341	93.085	0.43668	95.219	95.049	95.486	2.1332					124	46	7	0	0	0
doa10Δ(H)/WT(L) Rep1	FCFMHDILLTAYSPLGSHGAPNLK	24	1	Unmodified	_FCFMHDILLTAYSPLGSHGAPNLK_					0	0	0	0	P38115	P38115	P38115	ARA1	D-arabinose dehydrogenase [NAD(P)+] heavy chain	MULTI-MSMS		675.594	4	673.087	2688.32	72878	5.7096	0.003843	-0.093719	-6.31e-05	5.6159	0.00378	673.588	675.341	93.621	0.34832	95.755	95.629	95.977	2.1332					109	35	5	0	0	0
doa10Δ(H)/WT(L) Rep1	FCFMHDILLTAYSPLGSHGAPNLK	24	1	Unmodified	_FCFMHDILLTAYSPLGSHGAPNLK_					0	0	0	0	P38115	P38115	P38115	ARA1	D-arabinose dehydrogenase [NAD(P)+] heavy chain	MSMS	0	897.12	3	897.114	2688.32	NaN	NaN	NaN	NaN	NaN	NaN	NaN	NaN	NaN	91.443	1	93.576	93.076	94.076	2.1332								0	0	0
doa10Δ(H)/WT(L) Rep1	FCFMHDILLTAYSPLGSHGAPNLK	24	1	Unmodified	_FCFMHDILLTAYSPLGSHGAPNLK_					0	0	0	0	P38115	P38115	P38115	ARA1	D-arabinose dehydrogenase [NAD(P)+] heavy chain	MULTI-MATCH			3	897.114	2688.32	62613.7	5.8219	0.0052229	1.5124	0.0013568	7.3343	0.0065797	897.782	900.122	93.07	0.1082	95.203	95.13	95.238	2.1332	1.4957	0.0027271	NaN	92.034	30	11	7	NaN	NaN	NaN
doa10Δ(H)/WT(L) Rep1	FCFMHDILLTAYSPLGSHGAPNLK	24	1	Unmodified	_FCFMHDILLTAYSPLGSHGAPNLK_					0	0	0	0	P38115	P38115	P38115	ARA1	D-arabinose dehydrogenase [NAD(P)+] heavy chain	MULTI-MATCH			4	673.087	2688.32	73318.4	5.5698	0.003749	0.062324	4.19e-05	5.6321	0.0037909	673.338	675.342	94.259	0.22221	96.392	96.224	96.447	2.1332	0.5843	0.00072739	NaN	58.093	58	22	5	NaN	NaN	NaN
doa10Δ(H)/WT(L) Rep1	FCFMHDILLTAYSPLGSHGAPNLK	24	1	Unmodified	_FCFMHDILLTAYSPLGSHGAPNLK_					0	0	0	0	P38115	P38115	P38115	ARA1	D-arabinose dehydrogenase [NAD(P)+] heavy chain	MULTI-MATCH			4	673.087	2688.32	72676.7	5.7609	0.0038776	0.016492	1.11e-05	5.7774	0.0038887	673.588	675.341	93.428	0.31555	95.561	95.362	95.677	2.1332	-0.062726	0.00043374	NaN	34.65	116	32	8	NaN	NaN	NaN
doa10Δ(H)/WT(L) Rep1	FCFMHDILLTAYSPLGSHGAPNLK	24	1	Unmodified	_FCFMHDILLTAYSPLGSHGAPNLK_					0	0	0	0	P38115	P38115	P38115	ARA1	D-arabinose dehydrogenase [NAD(P)+] heavy chain	MULTI-MATCH			4	673.087	2688.32	72179.5	5.5729	0.0037511	0.079401	5.34e-05	5.6523	0.0038045	673.338	675.342	91.503	0.23959	93.636	93.559	93.798	2.1332	-0.034484	0.00047831	NaN	124.94	190	26	12	NaN	NaN	NaN
doa10Δ(H)/WT(L) Rep1	FCFMHDILLTAYSPLGSHGAPNLKIPLVK	29	2	Unmodified	_FCFMHDILLTAYSPLGSHGAPNLKIPLVK_					0	0	0	1	P38115	P38115	P38115	ARA1	D-arabinose dehydrogenase [NAD(P)+] heavy chain	MULTI-MSMS		652.158	5	648.748	3238.7	73004	5.6664	0.0036761	0.1315	8.53e-05	5.7979	0.0037614	648.949	652.155	96.928	0.23498	99.062	98.936	99.171	2.1334					187	24	13	0	0	0
doa10Δ(H)/WT(L) Rep1	FCFMHDILLTAYSPLGSHGAPNLKIPLVK	29	2	Unmodified	_FCFMHDILLTAYSPLGSHGAPNLKIPLVK_					0	0	0	1	P38115	P38115	P38115	ARA1	D-arabinose dehydrogenase [NAD(P)+] heavy chain	MULTI-MSMS		811.19	4	810.683	3238.7	66461.3	5.6959	0.0046176	-0.0036574	-2.97e-06	5.6923	0.0046146	811.184	814.941	96.932	0.36047	99.065	98.906	99.267	2.1334					150	37	10	0	0	0
doa10Δ(H)/WT(L) Rep1	FCFMHDILLTAYSPLGSHGAPNLKIPLVK	29	2	Unmodified	_FCFMHDILLTAYSPLGSHGAPNLKIPLVK_					0	0	0	1	P38115	P38115	P38115	ARA1	D-arabinose dehydrogenase [NAD(P)+] heavy chain	MULTI-SECPEP		811.085	4	810.683	3238.7	67217.6	5.5878	0.0045299	0.20323	0.00016475	5.791	0.0046947	811.185	814.941	97.307	0.55427	99.44	99.267	99.821	2.1334					141	56	6	0	0	0
doa10Δ(H)/WT(L) Rep1	FCFMHDILLTAYSPLGSHGAPNLKIPLVK	29	2	Unmodified	_FCFMHDILLTAYSPLGSHGAPNLKIPLVK_					0	0	0	1	P38115	P38115	P38115	ARA1	D-arabinose dehydrogenase [NAD(P)+] heavy chain	MULTI-MATCH			5	648.748	3238.7	73307.6	5.6245	0.0036489	-0.16961	-0.00011003	5.4549	0.0035389	648.949	652.355	97.072	0.16744	99.206	99.153	99.321	2.1334	-0.16018	0.00041788	NaN	73.994	130	17	12	NaN	NaN	NaN
doa10Δ(H)/WT(L) Rep1	FCFMHDILLTAYSPLGSHGAPNLKIPLVK	29	2	Unmodified	_FCFMHDILLTAYSPLGSHGAPNLKIPLVK_					0	0	0	1	P38115	P38115	P38115	ARA1	D-arabinose dehydrogenase [NAD(P)+] heavy chain	MULTI-MATCH			5	648.748	3238.7	75561.1	5.5353	0.003591	0.6046	0.00039223	6.1399	0.0039833	649.149	652.355	99.103	0.33724	101.24	101.22	101.56	2.1334	0.40608	0.0012072	NaN	29.423	63	35	4	NaN	NaN	NaN
doa10Δ(H)/WT(L) Rep1	KFCFMHDILLTAYSPLGSHGAPNLK	25	2	Unmodified	_KFCFMHDILLTAYSPLGSHGAPNLK_					0	0	0	1	P38115	P38115	P38115	ARA1	D-arabinose dehydrogenase [NAD(P)+] heavy chain	MULTI-MSMS		709.373	4	705.111	2816.41	70929.4	5.5347	0.0039026	-0.045485	-3.21e-05	5.4892	0.0038705	705.362	709.369	83.116	0.62086	85.349	85.07	85.691	2.2335					573	63	13	0	0	0
doa10Δ(H)/WT(L) Rep1	KFCFMHDILLTAYSPLGSHGAPNLK	25	2	Unmodified	_KFCFMHDILLTAYSPLGSHGAPNLK_					0	0	0	1	P38115	P38115	P38115	ARA1	D-arabinose dehydrogenase [NAD(P)+] heavy chain	MULTI-MSMS		567.7	5	564.29	2816.41	75740.4	5.3653	0.0030276	0.084463	4.77e-05	5.4497	0.0030752	564.491	567.697	83.117	0.77281	85.35	85.097	85.869	2.2335					516	78	13	0	0	0
doa10Δ(H)/WT(L) Rep1	KFCFMHDILLTAYSPLGSHGAPNLK	25	2	Unmodified	_KFCFMHDILLTAYSPLGSHGAPNLK_					0	0	0	1	P38115	P38115	P38115	ARA1	D-arabinose dehydrogenase [NAD(P)+] heavy chain	MULTI-MSMS		705.366	4	705.111	2816.41	70953.4	5.6274	0.003968	0.14233	0.00010036	5.7697	0.0040683	705.362	709.369	83.525	0.43378	85.758	85.503	85.937	2.2335					278	35	12	0	0	0
doa10Δ(H)/WT(L) Rep1	KFCFMHDILLTAYSPLGSHGAPNLK	25	2	Unmodified	_KFCFMHDILLTAYSPLGSHGAPNLK_					0	0	0	1	P38115	P38115	P38115	ARA1	D-arabinose dehydrogenase [NAD(P)+] heavy chain	MULTI-MSMS		564.494	5	564.29	2816.41	75545.4	5.4676	0.0030853	0.36089	0.00020365	5.8285	0.003289	564.491	567.697	83.537	0.26706	85.77	85.612	85.879	2.2335					88	26	5	0	0	0
doa10Δ(H)/WT(L) Rep1	KFCFMHDILLTAYSPLGSHGAPNLK	25	2	Unmodified	_KFCFMHDILLTAYSPLGSHGAPNLK_					0	0	0	1	P38115	P38115	P38115	ARA1	D-arabinose dehydrogenase [NAD(P)+] heavy chain	MULTI-MSMS		709.374	4	705.111	2816.41	70929.4	5.7542	0.0040573	0.096956	6.84e-05	5.8512	0.0041257	705.362	709.619	83.983	0.98251	86.216	85.869	86.852	2.2335					599	98	11	0	0	0
doa10Δ(H)/WT(L) Rep1	KFCFMHDILLTAYSPLGSHGAPNLK	25	2	Unmodified	_KFCFMHDILLTAYSPLGSHGAPNLK_					0	0	0	1	P38115	P38115	P38115	ARA1	D-arabinose dehydrogenase [NAD(P)+] heavy chain	MULTI-MSMS		567.5	5	564.29	2816.41	76009.4	5.5661	0.0031409	0.2935	0.00016562	5.8596	0.0033065	564.291	567.697	84.009	0.86649	86.243	85.968	86.834	2.2335					350	86	7	0	0	0
doa10Δ(H)/WT(L) Rep1	KFCFMHDILLTAYSPLGSHGAPNLK	25	2	Unmodified	_KFCFMHDILLTAYSPLGSHGAPNLK_					0	0	0	1	P38115	P38115	P38115	ARA1	D-arabinose dehydrogenase [NAD(P)+] heavy chain	MULTI-MSMS		705.365	4	705.111	2816.41	70977.3	5.7015	0.0040202	0.046374	3.27e-05	5.7479	0.0040529	705.362	709.369	84.544	0.49713	86.777	86.565	87.062	2.2335					204	52	9	0	0	0
doa10Δ(H)/WT(L) Rep1	KFCFMHDILLTAYSPLGSHGAPNLK	25	2	Unmodified	_KFCFMHDILLTAYSPLGSHGAPNLK_					0	0	0	1	P38115	P38115	P38115	ARA1	D-arabinose dehydrogenase [NAD(P)+] heavy chain	MULTI-MSMS		709.373	4	705.111	2816.41	70977.3	5.6318	0.0039711	0.070552	4.97e-05	5.7024	0.0040208	705.362	709.369	84.869	0.32593	87.102	86.956	87.282	2.2335					148	35	7	0	0	0
doa10Δ(H)/WT(L) Rep1	KFCFMHDILLTAYSPLGSHGAPNLK	25	2	Unmodified	_KFCFMHDILLTAYSPLGSHGAPNLK_					0	0	0	1	P38115	P38115	P38115	ARA1	D-arabinose dehydrogenase [NAD(P)+] heavy chain	MULTI-MSMS		709.625	4	705.111	2816.41	71414.6	5.5173	0.0038903	0.47012	0.00033149	5.9874	0.0042218	705.362	709.62	85.328	0.44934	87.561	87.439	87.888	2.2335					186	48	7	0	0	0
doa10Δ(H)/WT(L) Rep1	KFCFMHDILLTAYSPLGSHGAPNLK	25	2	Unmodified	_KFCFMHDILLTAYSPLGSHGAPNLK_					0	0	0	1	P38115	P38115	P38115	ARA1	D-arabinose dehydrogenase [NAD(P)+] heavy chain	MULTI-MSMS		567.701	5	564.29	2816.41	77468	5.2936	0.0029871	-0.2928	-0.00016523	5.0008	0.0028219	564.491	567.696	85.693	0.25779	87.927	87.78	88.038	2.2335					90	27	6	0	0	0
doa10Δ(H)/WT(L) Rep1	KFCFMHDILLTAYSPLGSHGAPNLK	25	2	Unmodified	_KFCFMHDILLTAYSPLGSHGAPNLK_					0	0	0	1	P38115	P38115	P38115	ARA1	D-arabinose dehydrogenase [NAD(P)+] heavy chain	MULTI-SECPEP		567.292	5	564.29	2816.41	76009.4	5.5061	0.003107	-0.2567	-0.00014485	5.2494	0.0029622	564.491	567.696	83.72	0.37082	85.953	85.78	86.151	2.2335					170	36	9	0	0	0
doa10Δ(H)/WT(L) Rep1	KFCFMHDILLTAYSPLGSHGAPNLK	25	2	Unmodified	_KFCFMHDILLTAYSPLGSHGAPNLK_					0	0	0	1	P38115	P38115	P38115	ARA1	D-arabinose dehydrogenase [NAD(P)+] heavy chain	MULTI-SECPEP		564.063	5	564.29	2816.41	75642.8	5.5197	0.0031147	0.097658	5.51e-05	5.6174	0.0031698	564.491	567.897	84.49	0.51552	86.723	86.565	87.081	2.2335					177	54	6	0	0	0
doa10Δ(H)/WT(L) Rep1	KFCFMHDILLTAYSPLGSHGAPNLK	25	2	Unmodified	_KFCFMHDILLTAYSPLGSHGAPNLK_					0	0	0	1	P38115	P38115	P38115	ARA1	D-arabinose dehydrogenase [NAD(P)+] heavy chain	MULTI-MATCH			3	939.812	2816.41	65260.8	5.3435	0.0050219	0.22439	0.00021088	5.5679	0.0052328	940.146	945.49	83.065	0.21449	85.298	85.202	85.417	2.2335	-0.39451	-0.00032471	NaN	26.66	43	21	4	NaN	NaN	NaN
doa10Δ(H)/WT(L) Rep1	KFCFMHDILLTAYSPLGSHGAPNLK	25	2	Unmodified	_KFCFMHDILLTAYSPLGSHGAPNLK_					0	0	0	1	P38115	P38115	P38115	ARA1	D-arabinose dehydrogenase [NAD(P)+] heavy chain	MULTI-MATCH			4	705.111	2816.41	72896	5.5159	0.0038893	0.079357	5.6e-05	5.5952	0.0039452	705.362	709.368	86.977	0.18981	89.211	89.142	89.331	2.2335	0.42924	0.00089137	NaN	71.946	57	20	6	NaN	NaN	NaN
doa10Δ(H)/WT(L) Rep1	KFCFMHDILLTAYSPLGSHGAPNLK	25	2	Unmodified	_KFCFMHDILLTAYSPLGSHGAPNLK_					0	0	0	1	P38115	P38115	P38115	ARA1	D-arabinose dehydrogenase [NAD(P)+] heavy chain	MULTI-MATCH			4	705.111	2816.41	71758.9	5.5889	0.0039408	-0.10049	-7.09e-05	5.4884	0.00387	705.361	709.619	89.546	0.16351	91.679	91.607	91.771	2.1332	0.090499	0.00032294	NaN	21.172	43	16	5	NaN	NaN	NaN
doa10Δ(H)/WT(L) Rep1	KFCFMHDILLTAYSPLGSHGAPNLK	25	2	Unmodified	_KFCFMHDILLTAYSPLGSHGAPNLK_					0	0	0	1	P38115	P38115	P38115	ARA1	D-arabinose dehydrogenase [NAD(P)+] heavy chain	MULTI-MATCH			4	705.111	2816.41	70949.9	5.5209	0.0038928	0.4868	0.00034325	6.0077	0.0042361	705.612	709.369	87.22	0.34474	89.453	89.278	89.623	2.2335	-0.28695	0.0015572	NaN	49.515	124	36	8	NaN	NaN	NaN
doa10Δ(H)/WT(L) Rep1	KFCFMHDILLTAYSPLGSHGAPNLK	25	2	Unmodified	_KFCFMHDILLTAYSPLGSHGAPNLK_					0	0	0	1	P38115	P38115	P38115	ARA1	D-arabinose dehydrogenase [NAD(P)+] heavy chain	MULTI-MATCH			4	705.111	2816.41	71414.5	5.4639	0.0038526	0.074988	5.29e-05	5.5389	0.0039055	705.362	709.118	85.696	0.33817	87.93	87.825	88.163	2.2335	0.017308	-0.00012151	NaN	108.28	204	36	11	NaN	NaN	NaN
doa10Δ(H)/WT(L) Rep1	KFCFMHDILLTAYSPLGSHGAPNLK	25	2	Unmodified	_KFCFMHDILLTAYSPLGSHGAPNLK_					0	0	0	1	P38115	P38115	P38115	ARA1	D-arabinose dehydrogenase [NAD(P)+] heavy chain	MULTI-MATCH			4	705.111	2816.41	71199.9	5.4897	0.0038709	-0.03963	-2.79e-05	5.4501	0.0038429	705.362	709.368	86.546	0.32243	88.779	88.588	88.91	2.2335	0.11522	-0.00058085	NaN	40.88	226	33	10	NaN	NaN	NaN
doa10Δ(H)/WT(L) Rep1	KFCFMHDILLTAYSPLGSHGAPNLK	25	2	Unmodified	_KFCFMHDILLTAYSPLGSHGAPNLK_					0	0	0	1	P38115	P38115	P38115	ARA1	D-arabinose dehydrogenase [NAD(P)+] heavy chain	MULTI-MATCH			5	564.29	2816.41	76314.3	5.4683	0.0030857	-0.81731	-0.0004612	4.651	0.0026245	564.49	567.696	84.863	0.35339	87.097	86.964	87.318	2.2335	0.74638	-0.0020995	NaN	78.419	112	38	6	NaN	NaN	NaN
doa10Δ(H)/WT(L) Rep1	KFCFMHDILLTAYSPLGSHGAPNLK	25	2	Unmodified	_KFCFMHDILLTAYSPLGSHGAPNLK_					0	0	0	1	P38115	P38115	P38115	ARA1	D-arabinose dehydrogenase [NAD(P)+] heavy chain	MULTI-MATCH			5	564.29	2816.41	78035.3	5.3034	0.0029926	-0.072045	-4.07e-05	5.2313	0.002952	564.491	567.696	86.168	0.42498	88.401	88.163	88.588	2.2335	0.12799	-0.00045981	NaN	61.16	97	43	5	NaN	NaN	NaN
doa10Δ(H)/WT(L) Rep1	KFCFMHDILLTAYSPLGSHGAPNLK	25	2	Unmodified	_KFCFMHDILLTAYSPLGSHGAPNLK_					0	0	0	1	P38115	P38115	P38115	ARA1	D-arabinose dehydrogenase [NAD(P)+] heavy chain	MULTI-MATCH			5	564.29	2816.41	74708.4	5.3762	0.0030337	1.5028	0.00084803	6.879	0.0038817	564.492	567.698	85.301	0.05658	87.535	87.495	87.551	2.2335	0.47402	0.0032199	NaN	93.804	16	5	6	NaN	NaN	NaN
doa10Δ(H)/WT(L) Rep1	KFCFMHDILLTAYSPLGSHGAPNLK	25	2	Oxidation (M)	_KFCFM(ox)HDILLTAYSPLGSHGAPNLK_					0	0	1	1	P38115	P38115	P38115	ARA1	D-arabinose dehydrogenase [NAD(P)+] heavy chain	MULTI-MATCH			4	709.11	2832.41	74391	5.7383	0.0040691	-0.50315	-0.00035679	5.2351	0.0037123	709.611	713.367	73.342	0.21819	75.576	75.529	75.748	2.2335	0.12771	-0.0019055	NaN	62.823	85	23	6	NaN	NaN	NaN
doa10Δ(H)/WT(L) Rep1	SSSVASTENIVENMLHPK	18	1	Acetyl (Protein N-term)	_(ac)SSSVASTENIVENMLHPK_					1	0	0	0	P38115	P38115	P38115	ARA1	D-arabinose dehydrogenase [NAD(P)+] heavy chain	MULTI-MATCH			3	662.326	1983.96	74028.8	5.7838	0.0038308	0.47538	0.00031486	6.2592	0.0041456	662.327	664.998	97.477	0.45117	99.611	99.45	99.901	2.1334	-0.39815	0.00041221	NaN	49.343	126	46	4	NaN	NaN	NaN
doa10Δ(H)/WT(L) Rep1	TTEIYFSLNNGVR	13	0	Unmodified	_TTEIYFSLNNGVR_					0	0	0	0	P38115	P38115	P38115	ARA1	D-arabinose dehydrogenase [NAD(P)+] heavy chain	ISO-MSMS	-1	757.39	2	757.386	1512.76	NaN	NaN	NaN	0.18461	0.00013982	NaN	NaN	NaN	NaN	67.956	1.7914	70.09	69.663	71.454	2.1334								0	0	0
doa10Δ(H)/WT(L) Rep1	FIASAGTYANLVK	13	1	Unmodified	_FIASAGTYANLVK_					0	0	0	0	P40024	P40024	P40024	ARB1	ABC transporter ATP-binding protein ARB1	MULTI-MSMS		681.886	2	677.872	1353.73	73068.8	5.7079	0.0038692	0.17643	0.0001196	5.8844	0.0039888	677.872	681.879	61.449	0.55135	63.583	63.247	63.798	2.1335					267	58	6	0	0	0
doa10Δ(H)/WT(L) Rep1	LGVYSQHSQDQLDLTK	16	1	Unmodified	_LGVYSQHSQDQLDLTK_					0	0	0	0	P40024	P40024	P40024	ARB1	ABC transporter ATP-binding protein ARB1	MULTI-MSMS		611.314	3	611.311	1830.91	77684.1	5.1238	0.0031322	0.32385	0.00019797	5.4477	0.0033302	611.311	613.983	46.624	0.47182	48.657	48.428	48.9	2.0333					205	49	6	0	0	0
doa10Δ(H)/WT(L) Rep1	SALEFVR	7	0	Unmodified	_SALEFVR_					0	0	0	0	P40024	P40024	P40024	ARB1	ABC transporter ATP-binding protein ARB1	ISO-MSMS	-1	411.232	2	411.229	820.444	NaN	NaN	NaN	0.18624	7.66e-05	NaN	NaN	NaN	NaN	46.043	0.41281	48.076	47.864	48.277	2.0333								0	0	0
doa10Δ(H)/WT(L) Rep1	TLVLVSHSQDFLNGVCTNMIDMR	23	0	Unmodified	_TLVLVSHSQDFLNGVCTNMIDMR_					0	0	0	0	P40024	P40024	P40024	ARB1	ABC transporter ATP-binding protein ARB1	ISO-MSMS	-1	884.437	3	884.098	2649.27	NaN	NaN	NaN	-0.28361	-0.00025074	NaN	NaN	NaN	NaN	90.552	0.69251	92.685	92.365	93.058	2.1332								0	0	0
doa10Δ(H)/WT(L) Rep1	VVTGVLSSLETSR	13	0	Unmodified	_VVTGVLSSLETSR_					0	0	0	0	P40024	P40024	P40024	ARB1	ABC transporter ATP-binding protein ARB1	ISO-MSMS	-1	674.881	2	674.378	1346.74	NaN	NaN	NaN	0.12165	8.2e-05	NaN	NaN	NaN	NaN	61.487	0.65611	63.621	63.285	63.941	2.1335								0	0	0
doa10Δ(H)/WT(L) Rep1	EQSAQAAQWESVLK	14	1	Unmodified	_EQSAQAAQWESVLK_					0	0	0	0	P46672	P46672	P46672	ARC1	tRNA-aminoacylation cofactor ARC1	MULTI-MSMS		791.905	2	787.894	1573.77	69080.1	5.721	0.0045075	-0.014778	-1.16e-05	5.7062	0.0044959	787.894	791.901	63.703	0.47157	65.836	65.615	66.086	2.1334					175	49	5	0	0	0
doa10Δ(H)/WT(L) Rep1	SGQIQPHLDQLNLVLR	16	0	Unmodified	_SGQIQPHLDQLNLVLR_					0	0	0	0	P46672	P46672	P46672	ARC1	tRNA-aminoacylation cofactor ARC1	ISO-MSMS	-1	611.348	3	611.011	1830.01	NaN	NaN	NaN	0.10992	6.72e-05	NaN	NaN	NaN	NaN	71.913	0.7388	74.046	73.68	74.419	2.1334								0	0	0
doa10Δ(H)/WT(L) Rep1	STYTTYR	7	0	Unmodified	_STYTTYR_					0	0	0	0	P46672	P46672	P46672	ARC1	tRNA-aminoacylation cofactor ARC1	ISO-MSMS	-1	446.217	2	446.214	890.413	NaN	NaN	NaN	0.060283	2.69e-05	NaN	NaN	NaN	NaN	19.312	0.49924	20.744	20.446	20.945	1.4318								0	0	0
doa10Δ(H)/WT(L) Rep1	TVCSGLVK	8	1	Unmodified	_TVCSGLVK_					0	0	0	0	P46672	P46672	P46672	ARC1	tRNA-aminoacylation cofactor ARC1	ISO-MSMS	0	432.238	2	432.236	862.458	NaN	NaN	NaN	0.061228	2.65e-05	NaN	NaN	NaN	NaN	22.3	0.51528	24.032	23.739	24.255	1.7324								0	0	0
doa10Δ(H)/WT(L) Rep1	YVVVVCNLKPVNMR	14	1	Unmodified	_YVVVVCNLKPVNMR_					0	0	0	1	P46672	P46672	P46672	ARC1	tRNA-aminoacylation cofactor ARC1	MULTI-MSMS		566.985	3	564.309	1689.91	77948.4	5.5779	0.0031477	-0.29268	-0.00016516	5.2852	0.0029825	564.644	566.981	57.497	1.0851	59.53	59.154	60.239	2.0333					351	114	7	0	0	0
doa10Δ(H)/WT(L) Rep1	YVVVVCNLKPVNMR	14	1	Unmodified	_YVVVVCNLKPVNMR_					0	0	0	1	P46672	P46672	P46672	ARC1	tRNA-aminoacylation cofactor ARC1	MSMS	0	564.312	3	564.309	1689.91	NaN	NaN	NaN	NaN	NaN	NaN	NaN	NaN	NaN	57.481	1	59.514	59.014	60.014	2.0333								0	0	0
doa10Δ(H)/WT(L) Rep1	YVVVVCNLKPVNMR	14	1	Unmodified	_YVVVVCNLKPVNMR_					0	0	0	1	P46672	P46672	P46672	ARC1	tRNA-aminoacylation cofactor ARC1	MSMS	0	564.313	3	564.309	1689.91	NaN	NaN	NaN	NaN	NaN	NaN	NaN	NaN	NaN	57.832	1	59.865	59.365	60.365	2.0333								0	0	0
doa10Δ(H)/WT(L) Rep1	QGGVLLAWLER	11	0	Unmodified	_QGGVLLAWLER_					0	0	0	0	P40518	P40518	P40518	ARC15	Actin-related protein 2/3 complex subunit 5	ISO-MSMS	-1	621.359	2	621.354	1240.69	NaN	NaN	NaN	-0.14273	-8.87e-05	NaN	NaN	NaN	NaN	91.549	0.83112	93.683	93.429	94.26	2.1332								0	0	0
doa10Δ(H)/WT(L) Rep1	QGGVLLAWLER	11	0	Unmodified	_QGGVLLAWLER_					0	0	0	0	P40518	P40518	P40518	ARC15	Actin-related protein 2/3 complex subunit 5	MSMS	-1	621.357	2	621.354	1240.69	NaN	NaN	NaN	NaN	NaN	NaN	NaN	NaN	NaN	91.755	1	93.888	93.388	94.388	2.1332								0	0	0
doa10Δ(H)/WT(L) Rep1	FWLAFTR	7	0	Unmodified	_FWLAFTR_					0	0	0	0	Q05933	Q05933	Q05933	ARC18	Actin-related protein 2/3 complex subunit 3	ISO-MSMS	-1	470.758	2	470.756	939.497	NaN	NaN	NaN	0.097774	4.6e-05	NaN	NaN	NaN	NaN	81.55	1.4539	83.783	83.204	84.658	2.2335								0	0	0
doa10Δ(H)/WT(L) Rep1	RVPIPGYSISFLITNK	16	1	Unmodified	_RVPIPGYSISFLITNK_					0	0	0	1	P33204	P33204	P33204	ARC19	Actin-related protein 2/3 complex subunit 4	MULTI-MATCH			3	602.349	1804.02	76590.6	5.4313	0.0032716	-0.75219	-0.00045308	4.6792	0.0028185	602.683	605.354	81.535	0.49428	83.768	83.413	83.908	2.2335	0.1642	-0.0014909	NaN	84.41	122	55	5	NaN	NaN	NaN
doa10Δ(H)/WT(L) Rep1	FITFVLFPR	9	0	Unmodified	_FITFVLFPR_					0	0	0	0	P53731	P53731	P53731	ARC35	Actin-related protein 2/3 complex subunit 2	ISO-MSMS	-1	570.337	2	570.334	1138.65	NaN	NaN	NaN	0.17429	9.94e-05	NaN	NaN	NaN	NaN	96.975	1.3796	99.108	98.479	99.858	2.1334								0	0	0
doa10Δ(H)/WT(L) Rep1	RFITFVLFPR	10	0	Unmodified	_RFITFVLFPR_					0	0	0	1	P53731	P53731	P53731	ARC35	Actin-related protein 2/3 complex subunit 2	ISO-MSMS	-1	432.928	3	432.592	1294.76	NaN	NaN	NaN	0.028834	1.25e-05	NaN	NaN	NaN	NaN	83.343	1.7101	85.576	84.95	86.661	2.2335								0	0	0
doa10Δ(H)/WT(L) Rep1	NAAWLVFANK	10	1	Unmodified	_NAAWLVFANK_					0	0	0	0	P11076	P11076	P11076	ARF1	ADP-ribosylation factor 1	MULTI-MSMS		571.32	2	567.309	1132.6	79010.9	5.609	0.003182	-0.0119	-6.75e-06	5.5971	0.0031753	567.309	571.316	73.27	1.0598	75.504	75.07	76.13	2.2335					527	114	8	0	0	0
doa10Δ(H)/WT(L) Rep1	QDLPEAMSAAEITEK	15	1	Unmodified	_QDLPEAMSAAEITEK_					0	0	0	0	P11076;P19146	P11076;P19146	P11076	ARF1;ARF2	ADP-ribosylation factor 1;ADP-ribosylation factor 2	MULTI-MSMS		820.905	2	816.893	1631.77	69042.3	5.8587	0.004786	0.23202	0.00018953	6.0908	0.0049755	816.893	820.9	60.561	0.33127	62.695	62.562	62.893	2.1335					129	34	7	0	0	0
doa10Δ(H)/WT(L) Rep1	QDLPEAMSAAEITEKLGLHSIR	22	1	GlyGly (K)	_QDLPEAMSAAEITEK(gl)LGLHSIR_					0	1	0	1	P11076;P19146	P11076;P19146	P11076	ARF1;ARF2	ADP-ribosylation factor 1;ADP-ribosylation factor 2	MULTI-MATCH			4	631.577	2522.28	77357.9	5.5797	0.003524	0.78105	0.00049329	6.3608	0.0040173	631.828	633.832	84.122	0.55813	86.356	86.007	86.565	2.2335	0.1893	0.0012379	NaN	56.553	114	54	5	NaN	NaN	NaN
doa10Δ(H)/WT(L) Rep1	NAVWLVFANK	10	1	Unmodified	_NAVWLVFANK_					0	0	0	0	P19146	P19146	P19146	ARF2	ADP-ribosylation factor 2	MULTI-MSMS		585.334	2	581.324	1160.63	77470.6	5.8888	0.0034233	-0.0050251	-2.92e-06	5.8837	0.0034204	581.324	585.331	80.131	1.1163	82.365	81.965	83.082	2.2335					703	117	8	0	0	0
doa10Δ(H)/WT(L) Rep1	DSFVTPNYSR	10	0	Unmodified	_DSFVTPNYSR_					0	0	0	0	P22768	P22768	P22768	ARG1	Argininosuccinate synthase	ISO-MSMS	-1	593.283	2	593.28	1184.55	NaN	NaN	NaN	-0.03005	-1.78e-05	NaN	NaN	NaN	NaN	43.903	0.66026	45.936	45.504	46.164	2.0333								0	0	0
doa10Δ(H)/WT(L) Rep1	EVSVTKPLDVFLAASNLAR	19	1	Unmodified	_EVSVTKPLDVFLAASNLAR_					0	0	0	1	P22768	P22768	P22768	ARG1	Argininosuccinate synthase	MULTI-MSMS		680.39	3	677.381	2029.12	74484.8	5.5061	0.0037298	0.11222	7.6e-05	5.6184	0.0038058	677.715	680.052	96.969	0.74388	99.103	98.765	99.509	2.1334					346	77	8	0	0	0
doa10Δ(H)/WT(L) Rep1	FELSFYALKPDVK	13	2	Unmodified	_FELSFYALKPDVK_					0	0	0	1	P22768	P22768	P22768	ARG1	Argininosuccinate synthase	MULTI-MSMS		519.62	3	519.617	1555.83	83243.7	5.5712	0.0028949	-0.12178	-6.33e-05	5.4494	0.0028316	519.617	524.959	79.002	1.1378	81.236	80.681	81.818	2.2335					923	120	11	0	0	0
doa10Δ(H)/WT(L) Rep1	FELSFYALKPDVK	13	2	Unmodified	_FELSFYALKPDVK_					0	0	0	1	P22768	P22768	P22768	ARG1	Argininosuccinate synthase	MULTI-MSMS		779.427	2	778.922	1555.83	70109.2	6.0425	0.0047066	-0.023465	-1.83e-05	6.019	0.0046883	778.921	786.936	79.015	0.79346	81.249	80.864	81.658	2.2335					355	84	7	0	0	0
doa10Δ(H)/WT(L) Rep1	GCYEQAPLTVLR	12	0	Unmodified	_GCYEQAPLTVLR_					0	0	0	0	P22768	P22768	P22768	ARG1	Argininosuccinate synthase	ISO-MSMS	-1	703.862	2	703.858	1405.7	NaN	NaN	NaN	-0.49751	-0.00035017	NaN	NaN	NaN	NaN	58.283	0.54285	60.316	60.035	60.578	2.0333								0	0	0
doa10Δ(H)/WT(L) Rep1	GCYEQAPLTVLRK	13	1	Unmodified	_GCYEQAPLTVLRK_					0	0	0	1	P22768	P22768	P22768	ARG1	Argininosuccinate synthase	MULTI-MSMS		512.611	3	512.273	1533.8	85085.4	5.304	0.0027171	0.21323	0.00010923	5.5172	0.0028263	512.273	514.945	47.342	0.32154	49.376	49.193	49.515	2.0333					108	34	5	0	0	0
doa10Δ(H)/WT(L) Rep1	GNDQIRFELSFYALKPDVK	19	2	Unmodified	_GNDQIRFELSFYALKPDVK_					0	0	0	2	P22768	P22768	P22768	ARG1	Argininosuccinate synthase	MULTI-MATCH			4	560.798	2239.16	81445.7	5.6972	0.003195	-0.77705	-0.00043577	4.9202	0.0027592	560.798	565.305	80.604	0.33587	82.837	82.665	83.001	2.2335	0.52351	-0.0019682	NaN	23.895	70	34	5	NaN	NaN	NaN
doa10Δ(H)/WT(L) Rep1	GNVIILGR	8	0	Unmodified	_GNVIILGR_					0	0	0	0	P22768	P22768	P22768	ARG1	Argininosuccinate synthase	ISO-MSMS	-1	421.268	2	421.266	840.518	NaN	NaN	NaN	-0.15645	-6.59e-05	NaN	NaN	NaN	NaN	44.075	0.7289	46.108	45.783	46.512	2.0333								0	0	0
doa10Δ(H)/WT(L) Rep1	IKKYGESK	8	3	GlyGly (K)	_IKK(gl)YGESK_					0	1	0	2	P22768	P22768	P22768	ARG1	Argininosuccinate synthase	MULTI-MATCH			2	533.798	1065.58	81033.6	5.0582	0.0027001	-0.11999	-6.4e-05	4.9382	0.002636	533.798	545.82	7.2872	0.13453	8.0173	7.9504	8.0849	0.73012	0.080036	-7.62e-05	NaN	99.136	35	12	5	NaN	NaN	NaN
doa10Δ(H)/WT(L) Rep1	LTYTDNK	7	1	Unmodified	_LTYTDNK_					0	0	0	0	P22768	P22768	P22768	ARG1	Argininosuccinate synthase	ISO-MSMS	0	427.718	2	427.716	853.418	NaN	NaN	NaN	-0.059033	-2.52e-05	NaN	NaN	NaN	NaN	16.272	0.19076	17.503	17.321	17.512	1.2313								0	0	0
doa10Δ(H)/WT(L) Rep1	LTYTDNK	7	1	Unmodified	_LTYTDNK_					0	0	0	0	P22768	P22768	P22768	ARG1	Argininosuccinate synthase	MSMS	1	431.726	2	427.716	853.418	NaN	NaN	NaN	NaN	NaN	NaN	NaN	NaN	NaN	16.197	1	17.429	16.929	17.929	1.2313								0	0	0
doa10Δ(H)/WT(L) Rep1	LTYTDNKTSK	10	2	GlyGly (K)	_LTYTDNK(gl)TSK_	LTYTDNK(0.99)TSK(0.01)		LTYTDNK(19.87)TSK(-19.87)		0	1	0	1	P22768	P22768	P22768	ARG1	Argininosuccinate synthase	MULTI-MSMS		434.231	3	428.886	1283.64	91590.5	5.3149	0.0022795	-0.041805	-1.79e-05	5.2731	0.0022615	428.886	434.229	14.962	0.30918	16.193	15.997	16.306	1.2313					198	34	7	0	0	0
doa10Δ(H)/WT(L) Rep1	LYKGNVIILGR	11	1	Unmodified	_LYKGNVIILGR_					0	0	0	1	P22768	P22768	P22768	ARG1	Argininosuccinate synthase	MULTI-MATCH			3	415.927	1244.76	95983.3	4.9413	0.0020552	0.34828	0.00014486	5.2896	0.0022001	415.928	418.599	47.794	0.52662	49.827	49.515	50.041	2.0333	0.099095	0.00052437	NaN	50.791	255	55	6	NaN	NaN	NaN
doa10Δ(H)/WT(L) Rep1	QEGCFAVSHGCTGK	14	1	Unmodified	_QEGCFAVSHGCTGK_					0	0	0	0	P22768	P22768	P22768	ARG1	Argininosuccinate synthase	MULTI-MSMS		513.224	3	513.222	1536.64	82100.9	5.206	0.0026719	-0.44892	-0.0002304	4.7571	0.0024415	513.222	515.894	21.519	0.74724	23.251	22.884	23.631	1.7324					407	74	10	0	0	0
doa10Δ(H)/WT(L) Rep1	QEGCFAVSHGCTGKGNDQIR	20	1	GlyGly (K)	_QEGCFAVSHGCTGK(gl)GNDQIR_	QEGCFAVSHGCTGK(1)GNDQIR		QEGCFAVSHGCTGK(42.68)GNDQIR		0	1	0	1	P22768	P22768	P22768	ARG1	Argininosuccinate synthase	MULTI-MSMS		584.767	4	584.513	2334.02	77472.2	5.5198	0.0032264	-0.41551	-0.00024287	5.1042	0.0029835	584.513	586.516	26.077	0.66816	28.01	27.763	28.432	1.9329					255	69	6	0	0	0
doa10Δ(H)/WT(L) Rep1	SMIQPSQNSVNGTVR	15	0	Unmodified	_SMIQPSQNSVNGTVR_					0	0	0	0	P22768	P22768	P22768	ARG1	Argininosuccinate synthase	ISO-MSMS	-1	809.409	2	809.404	1616.79	NaN	NaN	NaN	-0.39026	-0.00031588	NaN	NaN	NaN	NaN	35.788	0.63591	37.821	37.481	38.117	2.0331								0	0	0
doa10Δ(H)/WT(L) Rep1	TIALIFTK	8	1	Unmodified	_TIALIFTK_					0	0	0	0	P05150	P05150	P05150	ARG3	Ornithine carbamoyltransferase	MULTI-MATCH			2	453.787	905.559	90289.6	5.3437	0.0024249	0.60514	0.0002746	5.9488	0.0026995	453.787	457.794	65.478	0.10218	67.612	67.567	67.67	2.1334	0.43724	7.8e-06	NaN	78.113	39	12	5	NaN	NaN	NaN
doa10Δ(H)/WT(L) Rep1	ADLEGTKVYTAGLQK	15	2	GlyGly (K)	_ADLEGTK(gl)VYTAGLQK_	ADLEGTK(1)VYTAGLQK		ADLEGTK(48.18)VYTAGLQK(-48.18)		0	1	0	1	P04076	P04076	P04076	ARG4	Argininosuccinate lyase	MULTI-MSMS		569.971	3	569.969	1706.88	78050.8	5.3223	0.0030335	0.12188	6.95e-05	5.4442	0.003103	570.303	575.311	45.024	0.78226	47.057	46.692	47.475	2.0333					357	85	9	0	0	0
doa10Δ(H)/WT(L) Rep1	AEGEIDVLMPGYTHLQR	17	0	Unmodified	_AEGEIDVLMPGYTHLQR_					0	0	0	0	P04076	P04076	P04076	ARG4	Argininosuccinate lyase	ISO-MSMS	-1	643.661	3	643.656	1927.95	NaN	NaN	NaN	0.4831	0.00031095	NaN	NaN	NaN	NaN	69.105	0.28938	71.239	71.118	71.407	2.1334								0	0	0
doa10Δ(H)/WT(L) Rep1	ETHHISGECVATAER	15	0	Unmodified	_ETHHISGECVATAER_					0	0	0	0	P04076	P04076	P04076	ARG4	Argininosuccinate lyase	ISO-MSMS	-1	566.598	3	566.262	1695.76	NaN	NaN	NaN	-0.53193	-0.00030121	NaN	NaN	NaN	NaN	18.067	0.54504	19.399	19.155	19.701	1.3316								0	0	0
doa10Δ(H)/WT(L) Rep1	ETHHISGECVATAER	15	0	Unmodified	_ETHHISGECVATAER_					0	0	0	0	P04076	P04076	P04076	ARG4	Argininosuccinate lyase	ISO-MSMS	-1	424.95	4	424.948	1695.76	NaN	NaN	NaN	-0.35011	-0.00014878	NaN	NaN	NaN	NaN	18.08	0.86975	19.412	19.138	20.008	1.3316								0	0	0
doa10Δ(H)/WT(L) Rep1	FTGETDPLMHLYNASLPYDYK	21	1	Unmodified	_FTGETDPLMHLYNASLPYDYK_					0	0	0	0	P04076	P04076	P04076	ARG4	Argininosuccinate lyase	MULTI-MATCH			3	825.723	2474.15	67911	5.7653	0.0047606	0.01011	8.35e-06	5.7754	0.0047689	826.057	828.394	86.361	0.50978	88.594	88.436	88.946	2.2335	-0.22753	-0.00071594	NaN	35.133	134	53	5	NaN	NaN	NaN
doa10Δ(H)/WT(L) Rep1	FTGETDPLMHLYNASLPYDYKMYK	24	2	GlyGly (K)	_FTGETDPLMHLYNASLPYDYK(gl)MYK_	FTGETDPLMHLYNASLPYDYK(0.936)MYK(0.064)		FTGETDPLMHLYNASLPYDYK(11.66)MYK(-11.66)		0	1	0	1	P04076	P04076	P04076	ARG4	Argininosuccinate lyase	MULTI-SECPEP		753.608	4	753.604	3010.39	69183.6	5.5643	0.0041933	-0.3284	-0.00024749	5.2359	0.0039458	753.855	757.862	84.755	0.48566	86.988	86.622	87.107	2.2335					280	51	11	0	0	0
doa10Δ(H)/WT(L) Rep1	FTGETDPLMHLYNASLPYDYKMYK	24	2	GlyGly (K)	_FTGETDPLMHLYNASLPYDYK(gl)MYK_					0	1	0	1	P04076	P04076	P04076	ARG4	Argininosuccinate lyase	MULTI-MATCH			4	753.604	3010.39	69828.6	5.3619	0.0040407	-0.87674	-0.00066071	4.4851	0.00338	753.855	757.861	85.991	0.12939	88.224	88.154	88.284	2.2335	0.56467	-0.0022317	NaN	51.469	23	12	4	NaN	NaN	NaN
doa10Δ(H)/WT(L) Rep1	LGLSGIDKLTLEQYQK	16	2	Unmodified	_LGLSGIDKLTLEQYQK_					0	0	0	1	P04076	P04076	P04076	ARG4	Argininosuccinate lyase	MULTI-MATCH			3	602.672	1804.99	78998.8	5.9968	0.0036141	0.13514	8.14e-05	6.1319	0.0036955	602.672	608.349	69.935	0.58528	72.068	71.724	72.309	2.1334	0.29594	0.00032912	NaN	63.212	265	59	7	NaN	NaN	NaN
doa10Δ(H)/WT(L) Rep1	MYKADLEGTK	10	2	GlyGly (K)	_MYK(gl)ADLEGTK_	MYK(1)ADLEGTK		MYK(35.4)ADLEGTK(-35.4)		0	1	0	1	P04076	P04076	P04076	ARG4	Argininosuccinate lyase	MULTI-MSMS		429.223	3	423.876	1268.61	90757.8	5.1493	0.0021826	0.0010654	4.52e-07	5.1503	0.0021831	423.876	429.219	25.71	0.54639	27.542	27.282	27.828	1.8327					321	54	9	0	0	0
doa10Δ(H)/WT(L) Rep1	MYKADLEGTK	10	2	GlyGly (K)	_MYK(gl)ADLEGTK_	MYK(1)ADLEGTK		MYK(55.06)ADLEGTK(-55.06)		0	1	0	1	P04076	P04076	P04076	ARG4	Argininosuccinate lyase	MULTI-MSMS		643.33	2	635.311	1268.61	74776.6	5.4169	0.0034414	0.18346	0.00011655	5.6004	0.003558	635.311	643.326	25.713	0.33175	27.546	27.395	27.727	1.8327					127	32	7	0	0	0
doa10Δ(H)/WT(L) Rep1	SDGTQKLWGGR	11	1	Acetyl (Protein N-term),GlyGly (K)	_(ac)SDGTQK(gl)LWGGR_	SDGTQK(1)LWGGR		SDGTQK(46.35)LWGGR		1	1	0	1	P04076	P04076	P04076	ARG4	Argininosuccinate lyase	MULTI-SECPEP		685.379	2	680.834	1359.65	73961.4	5.6238	0.0038289	0.39908	0.00027171	6.0229	0.0041006	680.834	684.841	46.974	0.53917	49.008	48.769	49.308	2.0333					229	53	6	0	0	0
doa10Δ(H)/WT(L) Rep1	VFGDLTGFLMSLK	13	1	Oxidation (M)	_VFGDLTGFLM(ox)SLK_		VFGDLTGFLM(1)SLK		VFGDLTGFLM(83.2)SLK	0	0	1	0	P04076	P04076	P04076	ARG4	Argininosuccinate lyase	MULTI-MSMS		722.386	2	722.381	1442.75	71185.2	5.7173	0.0041301	-0.089226	-6.45e-05	5.6281	0.0040656	722.381	726.388	106.68	0.66501	108.41	107.97	108.63	1.7324					465	72	9	0	0	0
doa10Δ(H)/WT(L) Rep1	VFGDLTGFLMSLK	13	1	Oxidation (M)	_VFGDLTGFLM(ox)SLK_					0	0	1	0	P04076	P04076	P04076	ARG4	Argininosuccinate lyase	MULTI-MATCH			2	722.381	1442.75	71732.2	5.7446	0.0041498	0.82907	0.0005989	6.5736	0.0047487	722.382	726.389	106.9	0.26204	108.63	108.61	108.88	1.7324	0.0072235	0.00074205	NaN	56.414	108	28	6	NaN	NaN	NaN
doa10Δ(H)/WT(L) Rep1	VFGDLTGFLMSLK	13	1	Unmodified	_VFGDLTGFLMSLK_					0	0	0	0	P04076	P04076	P04076	ARG4	Argininosuccinate lyase	MULTI-MSMS		714.889	2	714.384	1426.75	73312.5	3.948	0.0028204	-0.53374	-0.00038129	3.4142	0.0024391	714.383	718.39	111.83	0.23637	112.36	112.24	112.48	0.52949					65	12	7	0	0	0
doa10Δ(H)/WT(L) Rep1	WSHWLSSYATYFTEDYKR	18	1	Unmodified	_WSHWLSSYATYFTEDYKR_					0	0	0	1	P04076	P04076	P04076	ARG4	Argininosuccinate lyase	MULTI-MATCH			4	585.773	2339.06	83613.7	5.308	0.0031093	0.48722	0.0002854	5.7952	0.0033947	586.024	588.027	82.031	0.15326	84.264	84.18	84.333	2.2335	-1.4361	-0.00079557	NaN	26.89	22	15	4	NaN	NaN	NaN
doa10Δ(H)/WT(L) Rep1	NLVSLINGHPYLEVAHVSSR	20	0	Unmodified	_NLVSLINGHPYLEVAHVSSR_					0	0	0	0	Q01217	Q01217	Q01217	ARG5,6	Protein ARG5,6, mitochondrial;N-acetyl-gamma-glutamyl-phosphate reductase;Acetylglutamate kinase	ISO-MSMS	-1	552.304	4	552.05	2204.17	NaN	NaN	NaN	-0.46639	-0.00025747	NaN	NaN	NaN	NaN	72.346	0.29781	74.479	74.333	74.63	2.1334								0	0	0
doa10Δ(H)/WT(L) Rep1	IIAESISNSMLVK	13	1	Unmodified	_IIAESISNSMLVK_					0	0	0	0	Q04728	Q04728	Q04728	ARG7	Arginine biosynthesis bifunctional protein ArgJ, mitochondrial;Glutamate N-acetyltransferase;Amino-acid acetyltransferase;Arginine biosynthesis bifunctional protein ArgJ alpha chain;Arginine biosynthesis bifunctional protein ArgJ beta chain	MULTI-MSMS		702.894	2	702.892	1403.77	72305.5	5.6085	0.0039422	0.33216	0.00023347	5.9407	0.0041757	702.892	706.899	63.203	0.5731	65.337	65.128	65.701	2.1334					271	59	6	0	0	0
doa10Δ(H)/WT(L) Rep1	ILCAIGYAK	9	1	Unmodified	_ILCAIGYAK_					0	0	0	0	Q04728	Q04728	Q04728	ARG7	Arginine biosynthesis bifunctional protein ArgJ, mitochondrial;Glutamate N-acetyltransferase;Amino-acid acetyltransferase;Arginine biosynthesis bifunctional protein ArgJ alpha chain;Arginine biosynthesis bifunctional protein ArgJ beta chain	MULTI-MATCH			2	504.781	1007.55	87174.9	5.1169	0.0025829	0.31467	0.00015884	5.4315	0.0027417	504.781	508.788	44.843	0.59514	46.876	46.512	47.107	2.0333	0.059212	0.0001341	NaN	59.35	204	63	5	NaN	NaN	NaN
doa10Δ(H)/WT(L) Rep1	MLTFATTR	8	0	Unmodified	_MLTFATTR_					0	0	0	0	Q04728	Q04728	Q04728	ARG7	Arginine biosynthesis bifunctional protein ArgJ, mitochondrial;Glutamate N-acetyltransferase;Amino-acid acetyltransferase;Arginine biosynthesis bifunctional protein ArgJ alpha chain;Arginine biosynthesis bifunctional protein ArgJ beta chain	MSMS	-1	470.752	2	470.75	939.485	NaN	NaN	NaN	NaN	NaN	NaN	NaN	NaN	NaN	46.322	1	48.355	47.855	48.855	2.0333								0	0	0
doa10Δ(H)/WT(L) Rep1	NSTLVMSTGVIGQR	14	0	Unmodified	_NSTLVMSTGVIGQR_					0	0	0	0	Q04728	Q04728	Q04728	ARG7	Arginine biosynthesis bifunctional protein ArgJ, mitochondrial;Glutamate N-acetyltransferase;Amino-acid acetyltransferase;Arginine biosynthesis bifunctional protein ArgJ alpha chain;Arginine biosynthesis bifunctional protein ArgJ beta chain	ISO-MSMS	-1	732.393	2	731.888	1461.76	NaN	NaN	NaN	-0.78067	-0.00057136	NaN	NaN	NaN	NaN	54.221	0.52119	56.254	55.975	56.496	2.0333								0	0	0
doa10Δ(H)/WT(L) Rep1	SRPSTAAAVFTTNK	14	1	Unmodified	_SRPSTAAAVFTTNK_					0	0	0	1	Q04728	Q04728	Q04728	ARG7	Arginine biosynthesis bifunctional protein ArgJ, mitochondrial;Glutamate N-acetyltransferase;Amino-acid acetyltransferase;Arginine biosynthesis bifunctional protein ArgJ alpha chain;Arginine biosynthesis bifunctional protein ArgJ beta chain	MULTI-MSMS		487.268	3	484.26	1449.76	88050.8	5.4427	0.0026357	-0.14775	-7.16e-05	5.2949	0.0025641	484.594	486.931	28.851	1.0526	30.784	30.436	31.489	1.9329					303	110	5	0	0	0
doa10Δ(H)/WT(L) Rep1	TALYGQDANWGR	12	0	Unmodified	_TALYGQDANWGR_					0	0	0	0	Q04728	Q04728	Q04728	ARG7	Arginine biosynthesis bifunctional protein ArgJ, mitochondrial;Glutamate N-acetyltransferase;Amino-acid acetyltransferase;Arginine biosynthesis bifunctional protein ArgJ alpha chain;Arginine biosynthesis bifunctional protein ArgJ beta chain	ISO-MSMS	-1	676.327	2	676.323	1350.63	NaN	NaN	NaN	0.4704	0.00031815	NaN	NaN	NaN	NaN	49.606	0.63565	51.74	51.402	52.038	2.1335								0	0	0
doa10Δ(H)/WT(L) Rep1	TMGALSVTWNSK	12	1	Unmodified	_TMGALSVTWNSK_					0	0	0	0	P18544	P18544	P18544	ARG8	Acetylornithine aminotransferase, mitochondrial	ISO-MSMS	0	648.328	2	647.827	1293.64	NaN	NaN	NaN	-1.4796	-0.00095849	NaN	NaN	NaN	NaN	59.687	0.42711	61.721	61.354	61.781	2.0333								0	0	0
doa10Δ(H)/WT(L) Rep1	TMGALSVTWNSK	12	1	Unmodified	_TMGALSVTWNSK_					0	0	0	0	P18544	P18544	P18544	ARG8	Acetylornithine aminotransferase, mitochondrial	ISO-MSMS	0	647.83	2	647.827	1293.64	NaN	NaN	NaN	-0.03826	-2.48e-05	NaN	NaN	NaN	NaN	59.903	0.45761	61.937	61.781	62.239	2.0333								0	0	0
doa10Δ(H)/WT(L) Rep1	TVSIVGSGPSGFYTAYHLLK	20	1	Unmodified	_TVSIVGSGPSGFYTAYHLLK_					0	0	0	0	P48360	P48360	P48360	ARH1	Probable NADPH:adrenodoxin oxidoreductase, mitochondrial	MULTI-MSMS		700.046	3	699.705	2096.09	75250.3	5.8365	0.0040838	0.44279	0.00030982	6.2793	0.0043936	700.04	702.711	80.668	0.78789	82.902	82.609	83.397	2.2335					263	83	7	0	0	0
doa10Δ(H)/WT(L) Rep1	LLGFQFYNLK	10	1	Unmodified	_LLGFQFYNLK_					0	0	0	0	P53111	P53111	P53111	ARI1	NADPH-dependent aldehyde reductase ARI1	MULTI-MSMS		625.858	2	621.848	1241.68	76959.4	5.3294	0.003314	0.29475	0.00018329	5.6241	0.0034973	621.848	625.855	87.255	0.74767	89.488	89.024	89.772	2.2335					400	80	6	0	0	0
doa10Δ(H)/WT(L) Rep1	ELNLVELKDR	10	1	GlyGly (K)	_ELNLVELK(gl)DR_	ELNLVELK(1)DR		ELNLVELK(54.49)DR		0	1	0	1	P38116	P38116	P38116	ARL1	ADP-ribosylation factor-like protein 1	MULTI-MSMS		451.257	3	448.249	1341.73	91104.4	5.4848	0.0024586	-0.090626	-4.06e-05	5.3942	0.0024179	448.249	450.92	53.506	0.69451	55.64	55.321	56.015	2.1335					310	73	6	0	0	0
doa10Δ(H)/WT(L) Rep1	QDQPGALSASEVSK	14	1	Unmodified	_QDQPGALSASEVSK_					0	0	0	0	P38116	P38116	P38116	ARL1	ADP-ribosylation factor-like protein 1	MULTI-MATCH			2	708.852	1415.69	72897.9	5.214	0.0036959	1.0406	0.00073766	6.2546	0.0044336	708.852	712.86	31.692	0.28511	33.625	33.387	33.673	1.9329	0.29274	0.00072408	NaN	43.548	66	28	4	NaN	NaN	NaN
doa10Δ(H)/WT(L) Rep1	SWSIVASSAIK	11	1	Unmodified	_SWSIVASSAIK_					0	0	0	0	P38116	P38116	P38116	ARL1	ADP-ribosylation factor-like protein 1	ISO-MSMS	0	574.822	2	574.819	1147.62	NaN	NaN	NaN	1.457	0.0008375	NaN	NaN	NaN	NaN	60.349	0.43375	62.482	62.226	62.66	2.1335								0	0	0
doa10Δ(H)/WT(L) Rep1	AALYALHSLGCK	12	1	Unmodified	_AALYALHSLGCK_					0	0	0	0	P08566	P08566	P08566	ARO1	Pentafunctional AROM polypeptide;3-dehydroquinate synthase;3-phosphoshikimate 1-carboxyvinyltransferase;Shikimate kinase;3-dehydroquinate dehydratase;Shikimate dehydrogenase	MULTI-MSMS		437.907	3	435.232	1302.68	93133.4	4.8682	0.0021188	0.53295	0.00023196	5.4012	0.0023508	435.233	437.904	47.604	0.49171	49.637	49.523	50.014	2.0333					182	51	5	0	0	0
doa10Δ(H)/WT(L) Rep1	ALILAALGEGQCK	13	1	Unmodified	_ALILAALGEGQCK_					0	0	0	0	P08566	P08566	P08566	ARO1	Pentafunctional AROM polypeptide;3-dehydroquinate synthase;3-phosphoshikimate 1-carboxyvinyltransferase;Shikimate kinase;3-dehydroquinate dehydratase;Shikimate dehydrogenase	MULTI-MSMS		676.381	2	672.371	1342.73	74605.8	5.7287	0.0038518	-0.68134	-0.00045811	5.0474	0.0033937	672.371	676.378	68.816	0.67756	70.949	70.7	71.377	2.1334					296	73	6	0	0	0
doa10Δ(H)/WT(L) Rep1	ALKDFASSGGYVLHLHR	17	1	Unmodified	_ALKDFASSGGYVLHLHR_					0	0	0	1	P08566	P08566	P08566	ARO1	Pentafunctional AROM polypeptide;3-dehydroquinate synthase;3-phosphoshikimate 1-carboxyvinyltransferase;Shikimate kinase;3-dehydroquinate dehydratase;Shikimate dehydrogenase	MULTI-MATCH			4	468.504	1869.98	91063.4	5.2614	0.002465	-0.35794	-0.0001677	4.9034	0.0022973	468.503	470.507	56.789	0.18793	58.823	58.698	58.886	2.0333	-0.67126	-0.0009868	NaN	62.69	53	18	5	NaN	NaN	NaN
doa10Δ(H)/WT(L) Rep1	ATDSIPIIFTVR	12	0	Unmodified	_ATDSIPIIFTVR_					0	0	0	0	P08566	P08566	P08566	ARO1	Pentafunctional AROM polypeptide;3-dehydroquinate synthase;3-phosphoshikimate 1-carboxyvinyltransferase;Shikimate kinase;3-dehydroquinate dehydratase;Shikimate dehydrogenase	ISO-MSMS	-1	666.884	2	666.88	1331.74	NaN	NaN	NaN	-1.0101	-0.00067362	NaN	NaN	NaN	NaN	82.669	0.55147	84.902	84.582	85.133	2.2335								0	0	0
doa10Δ(H)/WT(L) Rep1	DLKVPSDSSGPVGVCTYDDHR	21	1	Unmodified	_DLKVPSDSSGPVGVCTYDDHR_					0	0	0	1	P08566	P08566	P08566	ARO1	Pentafunctional AROM polypeptide;3-dehydroquinate synthase;3-phosphoshikimate 1-carboxyvinyltransferase;Shikimate kinase;3-dehydroquinate dehydratase;Shikimate dehydrogenase	MULTI-MSMS		576.773	4	576.769	2303.05	79923.1	5.1029	0.0029432	0.12002	6.92e-05	5.2229	0.0030124	576.77	578.773	49.454	0.39005	51.588	51.411	51.801	2.1335					101	40	5	0	0	0
doa10Δ(H)/WT(L) Rep1	FVLVDIK	7	1	Unmodified	_FVLVDIK_					0	0	0	0	P08566	P08566	P08566	ARO1	Pentafunctional AROM polypeptide;3-dehydroquinate synthase;3-phosphoshikimate 1-carboxyvinyltransferase;Shikimate kinase;3-dehydroquinate dehydratase;Shikimate dehydrogenase	MULTI-MATCH			2	417.26	832.506	94614.6	5.3808	0.0022452	0.038716	1.62e-05	5.4195	0.0022613	417.26	421.267	63.537	0.60002	65.67	65.385	65.985	2.1334	0.38005	0.00032131	NaN	67.981	191	62	4	NaN	NaN	NaN
doa10Δ(H)/WT(L) Rep1	HCPSSTYVICNDTNLSK	17	1	Unmodified	_HCPSSTYVICNDTNLSK_					0	0	0	0	P08566	P08566	P08566	ARO1	Pentafunctional AROM polypeptide;3-dehydroquinate synthase;3-phosphoshikimate 1-carboxyvinyltransferase;Shikimate kinase;3-dehydroquinate dehydratase;Shikimate dehydrogenase	MULTI-MSMS		665.972	3	665.968	1994.88	72267.6	5.5411	0.0036902	0.35084	0.00023365	5.8919	0.0039238	665.968	668.64	38.504	0.742	40.537	40.107	40.849	2.0333					231	74	6	0	0	0
doa10Δ(H)/WT(L) Rep1	IEYLNNEGSLPIK	13	1	Unmodified	_IEYLNNEGSLPIK_					0	0	0	0	P08566	P08566	P08566	ARO1	Pentafunctional AROM polypeptide;3-dehydroquinate synthase;3-phosphoshikimate 1-carboxyvinyltransferase;Shikimate kinase;3-dehydroquinate dehydratase;Shikimate dehydrogenase	MULTI-MSMS		745.402	2	745.398	1488.78	72133.5	5.9277	0.0044185	-0.09523	-7.1e-05	5.8325	0.0043475	745.398	749.405	61.412	0.36292	63.546	63.343	63.706	2.1335					144	38	6	0	0	0
doa10Δ(H)/WT(L) Rep1	ILVAYGLPVSPDEKWFK	17	2	GlyGly (K)	_ILVAYGLPVSPDEKWFK(gl)_	ILVAYGLPVSPDEK(0.463)WFK(0.537)		ILVAYGLPVSPDEK(-0.65)WFK(0.65)		0	1	0	1	P08566	P08566	P08566	ARO1	Pentafunctional AROM polypeptide;3-dehydroquinate synthase;3-phosphoshikimate 1-carboxyvinyltransferase;Shikimate kinase;3-dehydroquinate dehydratase;Shikimate dehydrogenase	MULTI-SECPEP		693.327	3	692.71	2075.11	73698.8	5.5813	0.0038662	0.47559	0.00032945	6.0569	0.0041957	693.045	698.388	85.803	0.65967	88.037	87.852	88.511	2.2335					154	69	5	0	0	0
doa10Δ(H)/WT(L) Rep1	ITQTATSTTVSGPPVGTLKPLK	22	2	Unmodified	_ITQTATSTTVSGPPVGTLKPLK_					0	0	0	1	P08566	P08566	P08566	ARO1	Pentafunctional AROM polypeptide;3-dehydroquinate synthase;3-phosphoshikimate 1-carboxyvinyltransferase;Shikimate kinase;3-dehydroquinate dehydratase;Shikimate dehydrogenase	MULTI-MSMS		738.766	3	733.086	2196.24	70621.7	5.8937	0.0043206	-0.023264	-1.71e-05	5.8705	0.0043036	733.42	738.763	50.08	0.64905	52.213	52.029	52.678	2.1335					183	74	4	0	0	0
doa10Δ(H)/WT(L) Rep1	ITQTATSTTVSGPPVGTLKPLK	22	2	Unmodified	_ITQTATSTTVSGPPVGTLKPLK_					0	0	0	1	P08566	P08566	P08566	ARO1	Pentafunctional AROM polypeptide;3-dehydroquinate synthase;3-phosphoshikimate 1-carboxyvinyltransferase;Shikimate kinase;3-dehydroquinate dehydratase;Shikimate dehydrogenase	MSMS	1	738.433	3	733.086	2196.24	NaN	NaN	NaN	NaN	NaN	NaN	NaN	NaN	NaN	49.926	1	52.06	51.56	52.56	2.1335								0	0	0
doa10Δ(H)/WT(L) Rep1	LESNASLFLNVVNGAK	16	1	Unmodified	_LESNASLFLNVVNGAK_					0	0	0	0	P08566	P08566	P08566	ARO1	Pentafunctional AROM polypeptide;3-dehydroquinate synthase;3-phosphoshikimate 1-carboxyvinyltransferase;Shikimate kinase;3-dehydroquinate dehydratase;Shikimate dehydrogenase	MULTI-MSMS		838.96	2	838.454	1674.89	67215.6	5.2806	0.0044276	0.0085527	7.17e-06	5.2892	0.0044347	838.455	842.462	81.559	0.5407	83.792	83.536	84.077	2.2335					228	60	6	0	0	0
doa10Δ(H)/WT(L) Rep1	LKPLIESLPSEFNIIGIESTK	21	2	Unmodified	_LKPLIESLPSEFNIIGIESTK_					0	0	0	1	P08566	P08566	P08566	ARO1	Pentafunctional AROM polypeptide;3-dehydroquinate synthase;3-phosphoshikimate 1-carboxyvinyltransferase;Shikimate kinase;3-dehydroquinate dehydratase;Shikimate dehydrogenase	ISO-MSMS	0	776.778	3	776.774	2327.3	NaN	NaN	NaN	0.30716	0.00023859	NaN	NaN	NaN	NaN	97.244	0.42406	99.377	99.276	99.7	2.1334								0	0	0
doa10Δ(H)/WT(L) Rep1	LLTYVVKPGETSK	13	2	Unmodified	_LLTYVVKPGETSK_					0	0	0	1	P08566	P08566	P08566	ARO1	Pentafunctional AROM polypeptide;3-dehydroquinate synthase;3-phosphoshikimate 1-carboxyvinyltransferase;Shikimate kinase;3-dehydroquinate dehydratase;Shikimate dehydrogenase	MULTI-MATCH			3	478.945	1433.81	85971	5.5177	0.0026427	0.089458	4.28e-05	5.6071	0.0026855	479.28	484.288	39.481	0.61739	41.514	41.222	41.84	2.0333	0.56099	-0.00070689	NaN	67.252	259	65	7	NaN	NaN	NaN
doa10Δ(H)/WT(L) Rep1	NFIGAFWQPK	10	1	Unmodified	_NFIGAFWQPK_					0	0	0	0	P08566	P08566	P08566	ARO1	Pentafunctional AROM polypeptide;3-dehydroquinate synthase;3-phosphoshikimate 1-carboxyvinyltransferase;Shikimate kinase;3-dehydroquinate dehydratase;Shikimate dehydrogenase	MULTI-MSMS		604.821	2	604.317	1206.62	78870.9	5.3672	0.0032435	-0.025445	-1.54e-05	5.3417	0.0032281	604.316	608.324	81.448	0.76397	83.682	83.295	84.059	2.2335					396	85	6	0	0	0
doa10Δ(H)/WT(L) Rep1	NKPLIAVNMTSK	12	2	Unmodified	_NKPLIAVNMTSK_					0	0	0	1	P08566	P08566	P08566	ARO1	Pentafunctional AROM polypeptide;3-dehydroquinate synthase;3-phosphoshikimate 1-carboxyvinyltransferase;Shikimate kinase;3-dehydroquinate dehydratase;Shikimate dehydrogenase	MULTI-MSMS		439.254	3	439.252	1314.73	90850.9	5.2268	0.0022959	-0.53221	-0.00023378	4.6946	0.0020621	439.252	444.594	37.713	0.98669	39.646	39.241	40.228	1.933					467	109	8	0	0	0
doa10Δ(H)/WT(L) Rep1	SVVIIGMR	8	0	Unmodified	_SVVIIGMR_					0	0	0	0	P08566	P08566	P08566	ARO1	Pentafunctional AROM polypeptide;3-dehydroquinate synthase;3-phosphoshikimate 1-carboxyvinyltransferase;Shikimate kinase;3-dehydroquinate dehydratase;Shikimate dehydrogenase	ISO-MSMS	-1	437.765	2	437.763	873.511	NaN	NaN	NaN	-0.10152	-4.44e-05	NaN	NaN	NaN	NaN	50.695	0.63742	52.829	52.535	53.173	2.1335								0	0	0
doa10Δ(H)/WT(L) Rep1	TWPGWWDVLHSELGAK	16	1	Unmodified	_TWPGWWDVLHSELGAK_					0	0	0	0	P08566	P08566	P08566	ARO1	Pentafunctional AROM polypeptide;3-dehydroquinate synthase;3-phosphoshikimate 1-carboxyvinyltransferase;Shikimate kinase;3-dehydroquinate dehydratase;Shikimate dehydrogenase	MULTI-MSMS		630.989	3	627.981	1880.92	75752	5.2052	0.0032688	0.64807	0.00040698	5.8533	0.0036758	628.316	630.653	100.49	0.79765	102.52	101.81	102.61	2.0331					705	90	10	0	0	0
doa10Δ(H)/WT(L) Rep1	TWPGWWDVLHSELGAK	16	1	Unmodified	_TWPGWWDVLHSELGAK_					0	0	0	0	P08566	P08566	P08566	ARO1	Pentafunctional AROM polypeptide;3-dehydroquinate synthase;3-phosphoshikimate 1-carboxyvinyltransferase;Shikimate kinase;3-dehydroquinate dehydratase;Shikimate dehydrogenase	MULTI-MSMS		941.474	2	941.468	1880.92	62693.9	5.2044	0.0048997	-0.041344	-3.89e-05	5.163	0.0048608	941.969	945.475	100.45	1.0861	102.48	102.1	103.18	2.0331					538	119	7	0	0	0
doa10Δ(H)/WT(L) Rep1	TWPGWWDVLHSELGAK	16	1	Unmodified	_TWPGWWDVLHSELGAK_					0	0	0	0	P08566	P08566	P08566	ARO1	Pentafunctional AROM polypeptide;3-dehydroquinate synthase;3-phosphoshikimate 1-carboxyvinyltransferase;Shikimate kinase;3-dehydroquinate dehydratase;Shikimate dehydrogenase	MULTI-MSMS		628.318	3	627.981	1880.92	75773.1	5.2093	0.0032713	0.29306	0.00018404	5.5024	0.0034554	628.315	630.652	100.56	0.99829	102.59	102.56	103.56	2.0331					734	106	11	0	0	0
doa10Δ(H)/WT(L) Rep1	TWPGWWDVLHSELGAK	16	1	Unmodified	_TWPGWWDVLHSELGAK_					0	0	0	0	P08566	P08566	P08566	ARO1	Pentafunctional AROM polypeptide;3-dehydroquinate synthase;3-phosphoshikimate 1-carboxyvinyltransferase;Shikimate kinase;3-dehydroquinate dehydratase;Shikimate dehydrogenase	MULTI-MSMS		628.318	3	627.981	1880.92	76490.7	5.2354	0.0032878	-0.093695	-5.88e-05	5.1417	0.0032289	628.315	630.652	101.36	0.20671	103.39	103.35	103.56	2.0331					94	21	5	0	0	0
doa10Δ(H)/WT(L) Rep1	TWPGWWDVLHSELGAK	16	1	Unmodified	_TWPGWWDVLHSELGAK_					0	0	0	0	P08566	P08566	P08566	ARO1	Pentafunctional AROM polypeptide;3-dehydroquinate synthase;3-phosphoshikimate 1-carboxyvinyltransferase;Shikimate kinase;3-dehydroquinate dehydratase;Shikimate dehydrogenase	MULTI-MSMS		630.989	3	627.981	1880.92	76392.8	5.2307	0.0032847	0.32338	0.00020308	5.554	0.0034878	627.981	630.987	101.66	0.52462	103.7	103.54	104.07	2.0331					276	54	8	0	0	0
doa10Δ(H)/WT(L) Rep1	TWPGWWDVLHSELGAK	16	1	Unmodified	_TWPGWWDVLHSELGAK_					0	0	0	0	P08566	P08566	P08566	ARO1	Pentafunctional AROM polypeptide;3-dehydroquinate synthase;3-phosphoshikimate 1-carboxyvinyltransferase;Shikimate kinase;3-dehydroquinate dehydratase;Shikimate dehydrogenase	MULTI-MSMS		627.984	3	627.981	1880.92	76457.2	5.2203	0.0032782	0.12114	7.61e-05	5.3414	0.0033543	628.315	630.987	102.25	0.60808	104.28	104.17	104.78	2.0331					218	64	6	0	0	0
doa10Δ(H)/WT(L) Rep1	TWPGWWDVLHSELGAK	16	1	Unmodified	_TWPGWWDVLHSELGAK_					0	0	0	0	P08566	P08566	P08566	ARO1	Pentafunctional AROM polypeptide;3-dehydroquinate synthase;3-phosphoshikimate 1-carboxyvinyltransferase;Shikimate kinase;3-dehydroquinate dehydratase;Shikimate dehydrogenase	MULTI-MSMS		631.324	3	627.981	1880.92	76097	5.2178	0.0032767	0.14019	8.8e-05	5.358	0.0033647	628.315	630.652	102.56	0.38899	104.5	104.33	104.72	1.9329					134	41	6	0	0	0
doa10Δ(H)/WT(L) Rep1	TWPGWWDVLHSELGAK	16	1	Unmodified	_TWPGWWDVLHSELGAK_					0	0	0	0	P08566	P08566	P08566	ARO1	Pentafunctional AROM polypeptide;3-dehydroquinate synthase;3-phosphoshikimate 1-carboxyvinyltransferase;Shikimate kinase;3-dehydroquinate dehydratase;Shikimate dehydrogenase	MULTI-MSMS		628.318	3	627.981	1880.92	76457.2	5.2015	0.0032664	0.11807	7.41e-05	5.3195	0.0033406	628.315	630.652	102.94	0.82628	104.87	104.66	105.48	1.9329					275	86	8	0	0	0
doa10Δ(H)/WT(L) Rep1	TWPGWWDVLHSELGAK	16	1	Unmodified	_TWPGWWDVLHSELGAK_					0	0	0	0	P08566	P08566	P08566	ARO1	Pentafunctional AROM polypeptide;3-dehydroquinate synthase;3-phosphoshikimate 1-carboxyvinyltransferase;Shikimate kinase;3-dehydroquinate dehydratase;Shikimate dehydrogenase	MULTI-MSMS		628.318	3	627.981	1880.92	76097	5.1651	0.0032436	0.18417	0.00011565	5.3492	0.0033592	627.981	630.987	103.15	0.61701	105.09	104.87	105.49	1.9329					273	64	6	0	0	0
doa10Δ(H)/WT(L) Rep1	TWPGWWDVLHSELGAK	16	1	Unmodified	_TWPGWWDVLHSELGAK_					0	0	0	0	P08566	P08566	P08566	ARO1	Pentafunctional AROM polypeptide;3-dehydroquinate synthase;3-phosphoshikimate 1-carboxyvinyltransferase;Shikimate kinase;3-dehydroquinate dehydratase;Shikimate dehydrogenase	MULTI-MSMS		628.318	3	627.981	1880.92	76423.8	5.1065	0.0032068	0.41603	0.00026126	5.5225	0.003468	627.981	630.987	103.79	0.98744	105.73	105.48	106.47	1.9329					334	105	7	0	0	0
doa10Δ(H)/WT(L) Rep1	TWPGWWDVLHSELGAK	16	1	Unmodified	_TWPGWWDVLHSELGAK_					0	0	0	0	P08566	P08566	P08566	ARO1	Pentafunctional AROM polypeptide;3-dehydroquinate synthase;3-phosphoshikimate 1-carboxyvinyltransferase;Shikimate kinase;3-dehydroquinate dehydratase;Shikimate dehydrogenase	MULTI-MSMS		630.99	3	627.981	1880.92	76423.8	5.0609	0.0031781	0.32337	0.00020307	5.3842	0.0033812	627.981	630.987	104.31	0.51479	106.25	106.04	106.56	1.9329					186	54	5	0	0	0
doa10Δ(H)/WT(L) Rep1	TWPGWWDVLHSELGAK	16	1	Unmodified	_TWPGWWDVLHSELGAK_					0	0	0	0	P08566	P08566	P08566	ARO1	Pentafunctional AROM polypeptide;3-dehydroquinate synthase;3-phosphoshikimate 1-carboxyvinyltransferase;Shikimate kinase;3-dehydroquinate dehydratase;Shikimate dehydrogenase	MULTI-MSMS		630.989	3	627.981	1880.92	76590.8	5.019	0.0031519	0.13789	8.66e-05	5.1569	0.0032384	628.315	630.653	104.81	0.60923	106.64	106.32	106.93	1.8327					200	66	6	0	0	0
doa10Δ(H)/WT(L) Rep1	TWPGWWDVLHSELGAK	16	1	Unmodified	_TWPGWWDVLHSELGAK_					0	0	0	0	P08566	P08566	P08566	ARO1	Pentafunctional AROM polypeptide;3-dehydroquinate synthase;3-phosphoshikimate 1-carboxyvinyltransferase;Shikimate kinase;3-dehydroquinate dehydratase;Shikimate dehydrogenase	MULTI-MSMS		630.99	3	627.981	1880.92	74975.6	5.0178	0.0031511	0.83071	0.00052167	5.8486	0.0036728	627.981	630.987	105.43	0.14654	107.27	107.2	107.34	1.8327					64	15	6	0	0	0
doa10Δ(H)/WT(L) Rep1	TWPGWWDVLHSELGAK	16	1	Unmodified	_TWPGWWDVLHSELGAK_					0	0	0	0	P08566	P08566	P08566	ARO1	Pentafunctional AROM polypeptide;3-dehydroquinate synthase;3-phosphoshikimate 1-carboxyvinyltransferase;Shikimate kinase;3-dehydroquinate dehydratase;Shikimate dehydrogenase	MULTI-MSMS		630.656	3	627.981	1880.92	78489.3	5.144	0.0032304	-0.53734	-0.00033744	4.6067	0.0028929	628.315	630.652	107.84	0.181	109.48	109.41	109.59	1.6322					63	19	9	0	0	0
doa10Δ(H)/WT(L) Rep1	TWPGWWDVLHSELGAK	16	1	Unmodified	_TWPGWWDVLHSELGAK_					0	0	0	0	P08566	P08566	P08566	ARO1	Pentafunctional AROM polypeptide;3-dehydroquinate synthase;3-phosphoshikimate 1-carboxyvinyltransferase;Shikimate kinase;3-dehydroquinate dehydratase;Shikimate dehydrogenase	MULTI-MSMS		630.992	3	627.981	1880.92	77367	5.08	0.0031902	0.48012	0.00030151	5.5602	0.0034917	628.315	630.987	108.74	0.49225	110.37	110.05	110.55	1.6322					164	50	6	0	0	0
doa10Δ(H)/WT(L) Rep1	TWPGWWDVLHSELGAK	16	1	Unmodified	_TWPGWWDVLHSELGAK_					0	0	0	0	P08566	P08566	P08566	ARO1	Pentafunctional AROM polypeptide;3-dehydroquinate synthase;3-phosphoshikimate 1-carboxyvinyltransferase;Shikimate kinase;3-dehydroquinate dehydratase;Shikimate dehydrogenase	MULTI-MSMS		628.319	3	627.981	1880.92	77351.7	5.0495	0.003171	0.2313	0.00014525	5.2808	0.0033162	628.316	630.986	109.05	0.10606	110.68	110.59	110.69	1.6322					31	11	5	0	0	0
doa10Δ(H)/WT(L) Rep1	TWPGWWDVLHSELGAK	16	1	Unmodified	_TWPGWWDVLHSELGAK_					0	0	0	0	P08566	P08566	P08566	ARO1	Pentafunctional AROM polypeptide;3-dehydroquinate synthase;3-phosphoshikimate 1-carboxyvinyltransferase;Shikimate kinase;3-dehydroquinate dehydratase;Shikimate dehydrogenase	MULTI-MSMS		628.319	3	627.981	1880.92	77057.8	4.9994	0.0031396	0.81955	0.00051466	5.819	0.0036542	628.315	630.652	109.68	0.33673	111.21	111.15	111.48	1.5319					130	35	6	0	0	0
doa10Δ(H)/WT(L) Rep1	TWPGWWDVLHSELGAK	16	1	Unmodified	_TWPGWWDVLHSELGAK_					0	0	0	0	P08566	P08566	P08566	ARO1	Pentafunctional AROM polypeptide;3-dehydroquinate synthase;3-phosphoshikimate 1-carboxyvinyltransferase;Shikimate kinase;3-dehydroquinate dehydratase;Shikimate dehydrogenase	MULTI-MSMS		627.984	3	627.981	1880.92	75542.4	4.6302	0.0029077	0.57611	0.00036179	5.2064	0.0032695	628.316	630.987	110.59	0.25966	112.12	111.94	112.2	1.5319					128	28	8	0	0	0
doa10Δ(H)/WT(L) Rep1	TWPGWWDVLHSELGAK	16	1	Unmodified	_TWPGWWDVLHSELGAK_					0	0	0	0	P08566	P08566	P08566	ARO1	Pentafunctional AROM polypeptide;3-dehydroquinate synthase;3-phosphoshikimate 1-carboxyvinyltransferase;Shikimate kinase;3-dehydroquinate dehydratase;Shikimate dehydrogenase	MULTI-MSMS		627.983	3	627.981	1880.92	76999.6	3.92	0.0024617	1.0752	0.00067517	4.9951	0.0031368	628.316	630.653	111.5	0.2417	112.03	111.9	112.14	0.52949					116	25	8	0	0	0
doa10Δ(H)/WT(L) Rep1	TWPGWWDVLHSELGAK	16	1	Unmodified	_TWPGWWDVLHSELGAK_					0	0	0	0	P08566	P08566	P08566	ARO1	Pentafunctional AROM polypeptide;3-dehydroquinate synthase;3-phosphoshikimate 1-carboxyvinyltransferase;Shikimate kinase;3-dehydroquinate dehydratase;Shikimate dehydrogenase	MSMS	1	630.656	3	627.981	1880.92	NaN	NaN	NaN	NaN	NaN	NaN	NaN	NaN	NaN	106.94	1	108.67	108.17	109.17	1.7324								0	0	0
doa10Δ(H)/WT(L) Rep1	TWPGWWDVLHSELGAK	16	1	Unmodified	_TWPGWWDVLHSELGAK_					0	0	0	0	P08566	P08566	P08566	ARO1	Pentafunctional AROM polypeptide;3-dehydroquinate synthase;3-phosphoshikimate 1-carboxyvinyltransferase;Shikimate kinase;3-dehydroquinate dehydratase;Shikimate dehydrogenase	MULTI-MATCH			3	627.981	1880.92	76423.7	5.0043	0.0031426	0.098106	6.16e-05	5.1024	0.0032042	627.981	630.653	105.31	0.25761	107.14	106.94	107.2	1.8327	0.2354	0.00052326	NaN	53.395	87	28	5	NaN	NaN	NaN
doa10Δ(H)/WT(L) Rep1	TWPGWWDVLHSELGAK	16	1	Unmodified	_TWPGWWDVLHSELGAK_					0	0	0	0	P08566	P08566	P08566	ARO1	Pentafunctional AROM polypeptide;3-dehydroquinate synthase;3-phosphoshikimate 1-carboxyvinyltransferase;Shikimate kinase;3-dehydroquinate dehydratase;Shikimate dehydrogenase	MULTI-MATCH			3	627.981	1880.92	NaN	4.9778	0.003126	-0.5739	-0.0003604	4.4039	0.0027656	628.315	630.987	109.95	0.069168	111.48	111.44	111.51	1.5319	-0.17951	-0.00089679	NaN	77.068	13	7	4	NaN	NaN	NaN
doa10Δ(H)/WT(L) Rep1	TWPGWWDVLHSELGAK	16	1	Unmodified	_TWPGWWDVLHSELGAK_					0	0	0	0	P08566	P08566	P08566	ARO1	Pentafunctional AROM polypeptide;3-dehydroquinate synthase;3-phosphoshikimate 1-carboxyvinyltransferase;Shikimate kinase;3-dehydroquinate dehydratase;Shikimate dehydrogenase	MULTI-MATCH			3	627.981	1880.92	76457.2	5.222	0.0032793	0.08424	5.29e-05	5.3063	0.0033322	628.315	630.652	102.08	0.15683	104.11	104.07	104.22	2.0331	-0.12502	-0.00022563	NaN	75.968	64	16	6	NaN	NaN	NaN
doa10Δ(H)/WT(L) Rep1	TWPGWWDVLHSELGAK	16	1	Unmodified	_TWPGWWDVLHSELGAK_					0	0	0	0	P08566	P08566	P08566	ARO1	Pentafunctional AROM polypeptide;3-dehydroquinate synthase;3-phosphoshikimate 1-carboxyvinyltransferase;Shikimate kinase;3-dehydroquinate dehydratase;Shikimate dehydrogenase	MULTI-MATCH			3	627.981	1880.92	75709	5.131	0.0032222	0.30558	0.0001919	5.4366	0.0034141	627.981	630.652	106.66	0.50946	108.4	108.14	108.65	1.7324	0.23826	-8.47e-05	NaN	43.592	204	55	7	NaN	NaN	NaN
doa10Δ(H)/WT(L) Rep1	TWPGWWDVLHSELGAK	16	1	Unmodified	_TWPGWWDVLHSELGAK_					0	0	0	0	P08566	P08566	P08566	ARO1	Pentafunctional AROM polypeptide;3-dehydroquinate synthase;3-phosphoshikimate 1-carboxyvinyltransferase;Shikimate kinase;3-dehydroquinate dehydratase;Shikimate dehydrogenase	MULTI-MATCH			3	627.981	1880.92	78991.2	5.0472	0.0031695	0.063962	4.02e-05	5.1111	0.0032097	628.315	630.987	109.14	0.10957	110.77	110.7	110.81	1.6322	-0.15964	-0.00067195	NaN	42.958	30	11	5	NaN	NaN	NaN
doa10Δ(H)/WT(L) Rep1	TWPGWWDVLHSELGAK	16	1	Unmodified	_TWPGWWDVLHSELGAK_					0	0	0	0	P08566	P08566	P08566	ARO1	Pentafunctional AROM polypeptide;3-dehydroquinate synthase;3-phosphoshikimate 1-carboxyvinyltransferase;Shikimate kinase;3-dehydroquinate dehydratase;Shikimate dehydrogenase	MULTI-MATCH			3	627.981	1880.92	77493.7	5.1535	0.0032363	0.49344	0.00030987	5.6469	0.0035461	627.981	630.653	107.68	0.19859	109.32	109.22	109.42	1.6322	-0.37877	0.00013132	NaN	30.072	83	21	6	NaN	NaN	NaN
doa10Δ(H)/WT(L) Rep1	TWPGWWDVLHSELGAK	16	1	Unmodified	_TWPGWWDVLHSELGAK_					0	0	0	0	P08566	P08566	P08566	ARO1	Pentafunctional AROM polypeptide;3-dehydroquinate synthase;3-phosphoshikimate 1-carboxyvinyltransferase;Shikimate kinase;3-dehydroquinate dehydratase;Shikimate dehydrogenase	MULTI-MATCH			3	627.981	1880.92	76390.8	5.0131	0.0031482	0.46194	0.00029009	5.4751	0.0034382	627.981	630.653	109.54	0.21481	111.17	111.04	111.25	1.6322	0.89041	2.56e-05	NaN	89.466	77	22	6	NaN	NaN	NaN
doa10Δ(H)/WT(L) Rep1	TWPGWWDVLHSELGAK	16	1	Unmodified	_TWPGWWDVLHSELGAK_					0	0	0	0	P08566	P08566	P08566	ARO1	Pentafunctional AROM polypeptide;3-dehydroquinate synthase;3-phosphoshikimate 1-carboxyvinyltransferase;Shikimate kinase;3-dehydroquinate dehydratase;Shikimate dehydrogenase	MULTI-MATCH			3	627.981	1880.92	77792.1	5.1184	0.0032143	0.62309	0.00039129	5.7415	0.0036055	628.315	630.653	108.22	0.29519	109.85	109.69	109.98	1.6322	-0.2314	7.04e-05	NaN	45.084	78	30	4	NaN	NaN	NaN
doa10Δ(H)/WT(L) Rep1	TWPGWWDVLHSELGAK	16	1	Unmodified	_TWPGWWDVLHSELGAK_					0	0	0	0	P08566	P08566	P08566	ARO1	Pentafunctional AROM polypeptide;3-dehydroquinate synthase;3-phosphoshikimate 1-carboxyvinyltransferase;Shikimate kinase;3-dehydroquinate dehydratase;Shikimate dehydrogenase	MULTI-MATCH			3	627.981	1880.92	76654	5.0321	0.0031601	0.85234	0.00053525	5.8844	0.0036953	628.316	630.987	109.33	0.39666	110.96	110.71	111.11	1.6322	1.4447	0.00047354	NaN	45.618	138	40	6	NaN	NaN	NaN
doa10Δ(H)/WT(L) Rep1	VAMSFSLLAGMVNSQNER	18	0	Unmodified	_VAMSFSLLAGMVNSQNER_					0	0	0	0	P08566	P08566	P08566	ARO1	Pentafunctional AROM polypeptide;3-dehydroquinate synthase;3-phosphoshikimate 1-carboxyvinyltransferase;Shikimate kinase;3-dehydroquinate dehydratase;Shikimate dehydrogenase	ISO-MSMS	-1	977.988	2	977.48	1952.94	NaN	NaN	NaN	0.12469	0.00012188	NaN	NaN	NaN	NaN	94.374	0.11566	96.507	96.437	96.553	2.1332								0	0	0
doa10Δ(H)/WT(L) Rep1	VAMSFSLLAGMVNSQNER	18	0	Unmodified	_VAMSFSLLAGMVNSQNER_					0	0	0	0	P08566	P08566	P08566	ARO1	Pentafunctional AROM polypeptide;3-dehydroquinate synthase;3-phosphoshikimate 1-carboxyvinyltransferase;Shikimate kinase;3-dehydroquinate dehydratase;Shikimate dehydrogenase	ISO-MSMS	-1	652.326	3	651.989	1952.94	NaN	NaN	NaN	-0.34168	-0.00022277	NaN	NaN	NaN	NaN	94.561	0.87471	96.695	96.437	97.312	2.1332								0	0	0
doa10Δ(H)/WT(L) Rep1	VIGAVNTVIPLGNKK	15	2	Unmodified	_VIGAVNTVIPLGNKK_					0	0	0	1	P08566	P08566	P08566	ARO1	Pentafunctional AROM polypeptide;3-dehydroquinate synthase;3-phosphoshikimate 1-carboxyvinyltransferase;Shikimate kinase;3-dehydroquinate dehydratase;Shikimate dehydrogenase	MULTI-MATCH			3	508.315	1521.92	85948.6	5.2208	0.0026538	-0.057801	-2.94e-05	5.163	0.0026244	508.65	513.992	53.502	0.31387	55.635	55.404	55.718	2.1335	1.0377	-0.00030841	NaN	27.767	92	33	4	NaN	NaN	NaN
doa10Δ(H)/WT(L) Rep1	VPSDSSGPVGVCTYDDHR	18	0	Unmodified	_VPSDSSGPVGVCTYDDHR_					0	0	0	0	P08566	P08566	P08566	ARO1	Pentafunctional AROM polypeptide;3-dehydroquinate synthase;3-phosphoshikimate 1-carboxyvinyltransferase;Shikimate kinase;3-dehydroquinate dehydratase;Shikimate dehydrogenase	ISO-MSMS	-1	650.293	3	649.955	1946.84	NaN	NaN	NaN	-0.70692	-0.00045947	NaN	NaN	NaN	NaN	36.89	0.80156	38.923	38.507	39.309	2.0331								0	0	0
doa10Δ(H)/WT(L) Rep1	VPYYQQLVLEFK	12	1	Unmodified	_VPYYQQLVLEFK_					0	0	0	0	P08566	P08566	P08566	ARO1	Pentafunctional AROM polypeptide;3-dehydroquinate synthase;3-phosphoshikimate 1-carboxyvinyltransferase;Shikimate kinase;3-dehydroquinate dehydratase;Shikimate dehydrogenase	MULTI-MSMS		763.92	2	763.916	1525.82	69792.4	5.6851	0.0043429	0.094037	7.18e-05	5.7791	0.0044148	763.916	767.923	89.43	1.1144	91.563	90.95	92.065	2.1332					618	119	8	0	0	0
doa10Δ(H)/WT(L) Rep1	VVILESIGK	9	1	Unmodified	_VVILESIGK_					0	0	0	0	P08566	P08566	P08566	ARO1	Pentafunctional AROM polypeptide;3-dehydroquinate synthase;3-phosphoshikimate 1-carboxyvinyltransferase;Shikimate kinase;3-dehydroquinate dehydratase;Shikimate dehydrogenase	MULTI-MSMS		479.304	2	479.303	956.591	88438.1	5.5418	0.0026562	-0.27863	-0.00013355	5.2632	0.0025227	479.302	483.309	55.456	0.43461	57.49	57.252	57.686	2.0333					167	50	4	0	0	0
doa10Δ(H)/WT(L) Rep1	VVQVPTSLLAMVDSSIGGK	19	1	Unmodified	_VVQVPTSLLAMVDSSIGGK_					0	0	0	0	P08566	P08566	P08566	ARO1	Pentafunctional AROM polypeptide;3-dehydroquinate synthase;3-phosphoshikimate 1-carboxyvinyltransferase;Shikimate kinase;3-dehydroquinate dehydratase;Shikimate dehydrogenase	MSMS	0	634.355	3	634.352	1900.03	NaN	NaN	NaN	NaN	NaN	NaN	NaN	NaN	NaN	105.52	1	107.35	106.85	107.85	1.8326								0	0	0
doa10Δ(H)/WT(L) Rep1	VVQVPTSLLAMVDSSIGGK	19	1	Unmodified	_VVQVPTSLLAMVDSSIGGK_					0	0	0	0	P08566	P08566	P08566	ARO1	Pentafunctional AROM polypeptide;3-dehydroquinate synthase;3-phosphoshikimate 1-carboxyvinyltransferase;Shikimate kinase;3-dehydroquinate dehydratase;Shikimate dehydrogenase	MULTI-SECPEP		637.083	3	634.352	1900.03	79749.2	5.1056	0.0032388	0.063695	4.04e-05	5.1693	0.0032792	635.02	637.023	105.76	0.16547	107.6	107.53	107.7	1.8327					67	17	5	0	0	0
doa10Δ(H)/WT(L) Rep1	YIVLTGNAR	9	0	Unmodified	_YIVLTGNAR_					0	0	0	0	P08566	P08566	P08566	ARO1	Pentafunctional AROM polypeptide;3-dehydroquinate synthase;3-phosphoshikimate 1-carboxyvinyltransferase;Shikimate kinase;3-dehydroquinate dehydratase;Shikimate dehydrogenase	ISO-MSMS	-1	503.79	2	503.788	1005.56	NaN	NaN	NaN	0.21374	0.00010768	NaN	NaN	NaN	NaN	38.831	0.82508	40.864	40.528	41.353	2.0333								0	0	0
doa10Δ(H)/WT(L) Rep1	YQWHVVPGSQMLVHQGVAQFEK	22	1	Unmodified	_YQWHVVPGSQMLVHQGVAQFEK_					0	0	0	0	P08566	P08566	P08566	ARO1	Pentafunctional AROM polypeptide;3-dehydroquinate synthase;3-phosphoshikimate 1-carboxyvinyltransferase;Shikimate kinase;3-dehydroquinate dehydratase;Shikimate dehydrogenase	MULTI-MATCH			4	642.826	2567.27	74808.6	5.8942	0.003789	0.84877	0.00054561	6.743	0.0043346	643.077	644.83	69.261	0.32952	71.395	71.241	71.571	2.1334	-0.27594	0.0013032	NaN	42.639	82	33	5	NaN	NaN	NaN
doa10Δ(H)/WT(L) Rep1	AIPIVEAMTALVLADALLIQK	21	1	Unmodified	_AIPIVEAMTALVLADALLIQK_					0	0	0	0	P28777	P28777	P28777	ARO2	Chorismate synthase	ISO-MSMS	0	732.104	3	731.769	2192.29	NaN	NaN	NaN	-1.0247	-0.00074987	NaN	NaN	NaN	NaN	112.74	0.062424	113.17	113.14	113.21	0.42924								0	0	0
doa10Δ(H)/WT(L) Rep1	AIPIVEAMTALVLADALLIQK	21	1	Unmodified	_AIPIVEAMTALVLADALLIQK_					0	0	0	0	P28777	P28777	P28777	ARO2	Chorismate synthase	MSMS	1	734.443	3	731.769	2192.29	NaN	NaN	NaN	NaN	NaN	NaN	NaN	NaN	NaN	112.75	1	113.18	112.68	113.68	0.42924								0	0	0
doa10Δ(H)/WT(L) Rep1	GFEIGSGFQGVSVPGSK	17	1	Unmodified	_GFEIGSGFQGVSVPGSK_					0	0	0	0	P28777	P28777	P28777	ARO2	Chorismate synthase	MULTI-MSMS		826.923	2	826.918	1651.82	66596	5.9711	0.0049376	0.42361	0.00035029	6.3947	0.0052879	827.419	831.426	73.721	0.5329	75.954	75.71	76.243	2.2335					272	56	7	0	0	0
doa10Δ(H)/WT(L) Rep1	SVATISQEQK	10	1	Unmodified	_SVATISQEQK_					0	0	0	0	P28777	P28777	P28777	ARO2	Chorismate synthase	MULTI-MSMS		546.294	2	545.791	1089.57	79821.6	5.4804	0.0029911	-0.19496	-0.00010641	5.2854	0.0028847	545.79	549.798	17.756	0.40399	19.088	18.91	19.314	1.3316					201	41	7	0	0	0
doa10Δ(H)/WT(L) Rep1	TLGTPIAMMIK	11	1	Unmodified	_TLGTPIAMMIK_					0	0	0	0	P28777	P28777	P28777	ARO2	Chorismate synthase	ISO-MSMS	0	588.334	2	588.33	1174.65	NaN	NaN	NaN	-0.036222	-2.13e-05	NaN	NaN	NaN	NaN	72.265	0.77343	74.398	74.073	74.846	2.1334								0	0	0
doa10Δ(H)/WT(L) Rep1	VASGAIAEK	9	1	Unmodified	_VASGAIAEK_					0	0	0	0	P28777	P28777	P28777	ARO2	Chorismate synthase	MULTI-MSMS		423.242	2	423.24	844.465	93656.9	5.2715	0.0022311	-0.10433	-4.42e-05	5.1672	0.002187	423.24	427.247	13.507	0.45407	14.638	14.496	14.951	1.1311					161	46	8	0	0	0
doa10Δ(H)/WT(L) Rep1	DLLIIMR	7	0	Unmodified	_DLLIIMR_					0	0	0	0	P14843	P14843	P14843	ARO3	Phospho-2-dehydro-3-deoxyheptonate aldolase, phenylalanine-inhibited	ISO-MSMS	-1	437.267	2	437.265	872.515	NaN	NaN	NaN	0.083565	3.65e-05	NaN	NaN	NaN	NaN	75.828	1.4638	78.062	77.715	79.178	2.2335								0	0	0
doa10Δ(H)/WT(L) Rep1	DSVCDILNGKDDR	13	1	Unmodified	_DSVCDILNGKDDR_					0	0	0	1	P14843	P14843	P14843	ARO3	Phospho-2-dehydro-3-deoxyheptonate aldolase, phenylalanine-inhibited	MULTI-MATCH			3	502.9	1505.68	85703.8	5.5005	0.0027662	0.1129	5.68e-05	5.6134	0.002823	502.9	505.572	52.726	0.38816	54.86	54.658	55.046	2.1335	-0.39251	-0.00079697	NaN	37.525	162	40	6	NaN	NaN	NaN
doa10Δ(H)/WT(L) Rep1	ELASGLSFPIGFK	13	1	Unmodified	_ELASGLSFPIGFK_					0	0	0	0	P14843	P14843	P14843	ARO3	Phospho-2-dehydro-3-deoxyheptonate aldolase, phenylalanine-inhibited	MULTI-MATCH			2	683.374	1364.73	76450.1	5.5384	0.0037848	0.31101	0.00021254	5.8494	0.0039973	683.374	687.883	86.538	0.52628	88.771	88.472	88.998	2.2335	0.56702	-0.00040859	NaN	39.561	162	55	5	NaN	NaN	NaN
doa10Δ(H)/WT(L) Rep1	IMIDCSHGNSNKDFK	15	2	Unmodified	_IMIDCSHGNSNKDFK_					0	0	0	1	P14843	P14843	P14843	ARO3	Phospho-2-dehydro-3-deoxyheptonate aldolase, phenylalanine-inhibited	MULTI-MATCH			4	442.205	1764.79	90935.9	5.4076	0.0023913	0.06387	2.82e-05	5.4715	0.0024195	442.205	446.212	27.147	0.47298	29.08	28.805	29.278	1.9329	-0.37596	0.00018722	NaN	64.104	128	47	5	NaN	NaN	NaN
doa10Δ(H)/WT(L) Rep1	LVIVIGPCSLHDPK	14	1	Unmodified	_LVIVIGPCSLHDPK_					0	0	0	0	P14843	P14843	P14843	ARO3	Phospho-2-dehydro-3-deoxyheptonate aldolase, phenylalanine-inhibited	MULTI-MSMS		516.628	3	516.625	1546.85	82590.5	5.2016	0.0026873	0.16985	8.78e-05	5.3715	0.002775	516.96	519.631	63.969	1.2557	66.103	65.591	66.846	2.1334					452	134	6	0	0	0
doa10Δ(H)/WT(L) Rep1	LVIVIGPCSLHDPK	14	1	Unmodified	_LVIVIGPCSLHDPK_					0	0	0	0	P14843	P14843	P14843	ARO3	Phospho-2-dehydro-3-deoxyheptonate aldolase, phenylalanine-inhibited	MSMS	1	519.299	3	516.625	1546.85	NaN	NaN	NaN	NaN	NaN	NaN	NaN	NaN	NaN	64.032	1	66.166	65.666	66.666	2.1334								0	0	0
doa10Δ(H)/WT(L) Rep1	NGTNFDKESVQNTK	14	2	Unmodified	_NGTNFDKESVQNTK_					0	0	0	1	P14843	P14843	P14843	ARO3	Phospho-2-dehydro-3-deoxyheptonate aldolase, phenylalanine-inhibited	MULTI-MSMS		533.268	3	527.922	1580.74	82550.1	5.3056	0.0028009	0.0038966	2.06e-06	5.3095	0.002803	527.922	533.264	19.681	0.52267	21.112	20.904	21.427	1.4318					285	59	8	0	0	0
doa10Δ(H)/WT(L) Rep1	AQLPAGSNGLMIDYSHGNSNK	21	1	Unmodified	_AQLPAGSNGLMIDYSHGNSNK_					0	0	0	0	P32449	P32449	P32449	ARO4	Phospho-2-dehydro-3-deoxyheptonate aldolase, tyrosine-inhibited	MULTI-MSMS		725.687	3	725.348	2173.02	70944.3	6.1536	0.0044635	-0.2949	-0.00021391	5.8587	0.0042496	725.682	728.353	52.544	0.76212	54.678	54.393	55.155	2.1335					478	80	9	0	0	0
doa10Δ(H)/WT(L) Rep1	AQLPAGSNGLMIDYSHGNSNKDFR	24	1	Unmodified	_AQLPAGSNGLMIDYSHGNSNKDFR_					0	0	0	1	P32449	P32449	P32449	ARO4	Phospho-2-dehydro-3-deoxyheptonate aldolase, tyrosine-inhibited	MULTI-MSMS		649.067	4	648.812	2591.22	74980.1	5.7801	0.0037502	0.25715	0.00016684	6.0373	0.0039171	649.063	651.066	54.544	0.33164	56.577	56.461	56.793	2.0333					120	34	5	0	0	0
doa10Δ(H)/WT(L) Rep1	AQLPAGSNGLMIDYSHGNSNKDFR	24	1	Unmodified	_AQLPAGSNGLMIDYSHGNSNKDFR_					0	0	0	1	P32449	P32449	P32449	ARO4	Phospho-2-dehydro-3-deoxyheptonate aldolase, tyrosine-inhibited	ISO-MSMS	0	649.067	4	648.812	2591.22	NaN	NaN	NaN	0.87623	0.00056851	NaN	NaN	NaN	NaN	54.372	0.22861	56.405	56.232	56.461	2.0333								0	0	0
doa10Δ(H)/WT(L) Rep1	AQLPAGSNGLMIDYSHGNSNKDFR	24	1	Unmodified	_AQLPAGSNGLMIDYSHGNSNKDFR_					0	0	0	1	P32449	P32449	P32449	ARO4	Phospho-2-dehydro-3-deoxyheptonate aldolase, tyrosine-inhibited	MULTI-MATCH			4	648.812	2591.22	75204	5.8454	0.0037925	-0.4046	-0.00026251	5.4408	0.00353	648.812	651.066	54.794	0.32697	56.827	56.687	57.013	2.0333	0.009174	-0.0017022	NaN	82.034	85	34	5	NaN	NaN	NaN
doa10Δ(H)/WT(L) Rep1	ELASGLSFPVGFK	13	1	Unmodified	_ELASGLSFPVGFK_					0	0	0	0	P32449	P32449	P32449	ARO4	Phospho-2-dehydro-3-deoxyheptonate aldolase, tyrosine-inhibited	MULTI-MSMS		676.37	2	676.366	1350.72	73175.6	5.3771	0.0036369	0.14964	0.00010121	5.5267	0.0037381	676.367	680.373	81.252	0.68834	83.486	83.178	83.866	2.2335					377	76	6	0	0	0
doa10Δ(H)/WT(L) Rep1	GDLSIIMR	8	0	Unmodified	_GDLSIIMR_					0	0	0	0	P32449	P32449	P32449	ARO4	Phospho-2-dehydro-3-deoxyheptonate aldolase, tyrosine-inhibited	ISO-MSMS	-1	452.752	2	452.75	903.485	NaN	NaN	NaN	-0.31423	-0.00014227	NaN	NaN	NaN	NaN	57.46	0.71845	59.493	59.258	59.976	2.0333								0	0	0
doa10Δ(H)/WT(L) Rep1	GLINDPDVNNTFNINK	16	1	Unmodified	_GLINDPDVNNTFNINK_					0	0	0	0	P32449	P32449	P32449	ARO4	Phospho-2-dehydro-3-deoxyheptonate aldolase, tyrosine-inhibited	ISO-MSMS	0	894.954	2	894.45	1786.88	NaN	NaN	NaN	-0.735	-0.00065742	NaN	NaN	NaN	NaN	67.152	0.24854	69.286	69.192	69.441	2.1334								0	0	0
doa10Δ(H)/WT(L) Rep1	HGVAAITTTK	10	1	Unmodified	_HGVAAITTTK_					0	0	0	0	P32449	P32449	P32449	ARO4	Phospho-2-dehydro-3-deoxyheptonate aldolase, tyrosine-inhibited	MULTI-MSMS		503.796	2	499.785	997.556	85303.9	5.5064	0.002752	-0.26622	-0.00013305	5.2402	0.002619	499.785	503.792	14.281	0.65975	15.512	15.295	15.955	1.2313					328	70	8	0	0	0
doa10Δ(H)/WT(L) Rep1	NGTDGTLNVAVDACQAAAHSHHFMGVTK	28	1	Unmodified	_NGTDGTLNVAVDACQAAAHSHHFMGVTK_					0	0	0	0	P32449	P32449	P32449	ARO4	Phospho-2-dehydro-3-deoxyheptonate aldolase, tyrosine-inhibited	MULTI-MATCH			5	582.674	2908.33	76809.8	5.6847	0.0033123	-0.68885	-0.00040137	4.9959	0.002911	582.875	584.677	59.326	0.49102	61.359	61.147	61.638	2.0333	-0.29791	-0.0021422	NaN	24.615	206	49	7	NaN	NaN	NaN
doa10Δ(H)/WT(L) Rep1	VLVIVGPCSIHDLEAAQEYALR	22	0	Unmodified	_VLVIVGPCSIHDLEAAQEYALR_					0	0	0	0	P32449	P32449	P32449	ARO4	Phospho-2-dehydro-3-deoxyheptonate aldolase, tyrosine-inhibited	ISO-MSMS	-1	818.771	3	818.433	2452.28	NaN	NaN	NaN	-0.04756	-3.89e-05	NaN	NaN	NaN	NaN	89.954	0.79744	92.087	92.065	92.862	2.1332								0	0	0
doa10Δ(H)/WT(L) Rep1	DFSYLFSDETNAR	13	0	Unmodified	_DFSYLFSDETNAR_					0	0	0	0	P53090	P53090	P53090	ARO8	Aromatic/aminoadipate aminotransferase 1	ISO-MSMS	-1	782.852	2	782.849	1563.68	NaN	NaN	NaN	-0.10417	-8.15e-05	NaN	NaN	NaN	NaN	80.454	0.71008	82.688	82.406	83.116	2.2335								0	0	0
doa10Δ(H)/WT(L) Rep1	GVLVVPGSWFK	11	1	Unmodified	_GVLVVPGSWFK_					0	0	0	0	P53090	P53090	P53090	ARO8	Aromatic/aminoadipate aminotransferase 1	MSMS	1	598.852	2	594.842	1187.67	NaN	NaN	NaN	NaN	NaN	NaN	NaN	NaN	NaN	84.978	1	87.212	86.712	87.712	2.2335								0	0	0
doa10Δ(H)/WT(L) Rep1	LGDTLYEEFGISK	13	1	Unmodified	_LGDTLYEEFGISK_					0	0	0	0	P53090	P53090	P53090	ARO8	Aromatic/aminoadipate aminotransferase 1	MULTI-MSMS		736.874	2	736.369	1470.72	71455.4	5.7222	0.0042136	-0.04105	-3.02e-05	5.6811	0.0041834	736.37	740.377	77.393	0.65438	79.627	79.383	80.037	2.2335					169	68	5	0	0	0
doa10Δ(H)/WT(L) Rep1	LGWITGSSK	9	1	Unmodified	_LGWITGSSK_					0	0	0	0	P53090	P53090	P53090	ARO8	Aromatic/aminoadipate aminotransferase 1	ISO-MSMS	0	474.764	2	474.761	947.508	NaN	NaN	NaN	0.88718	0.0004212	NaN	NaN	NaN	NaN	47.951	0.42952	50.084	49.736	50.165	2.1335								0	0	0
doa10Δ(H)/WT(L) Rep1	MDSFSKVLAPGTR	13	1	GlyGly (K)	_MDSFSK(gl)VLAPGTR_	MDSFSK(1)VLAPGTR		MDSFSK(65.5)VLAPGTR		0	1	0	1	P53090	P53090	P53090	ARO8	Aromatic/aminoadipate aminotransferase 1	MULTI-MSMS		508.263	3	508.261	1521.76	85565.2	4.9687	0.0025254	-0.054175	-2.75e-05	4.9145	0.0024978	508.261	510.932	49.893	0.93549	52.027	51.484	52.419	2.1335					240	104	4	0	0	0
doa10Δ(H)/WT(L) Rep1	SANPSNDIPLSR	12	0	Unmodified	_SANPSNDIPLSR_					0	0	0	0	P53090	P53090	P53090	ARO8	Aromatic/aminoadipate aminotransferase 1	ISO-MSMS	-1	635.826	2	635.823	1269.63	NaN	NaN	NaN	0.27397	0.0001742	NaN	NaN	NaN	NaN	37.962	0.56744	39.895	39.612	40.179	1.933								0	0	0
doa10Δ(H)/WT(L) Rep1	TCIHLFQDPNIIFLGGGLPLK	21	1	Unmodified	_TCIHLFQDPNIIFLGGGLPLK_					0	0	0	0	P53090	P53090	P53090	ARO8	Aromatic/aminoadipate aminotransferase 1	MULTI-MATCH			3	785.096	2352.27	76290.7	5.633	0.0044225	0.1743	0.00013685	5.8073	0.0045593	785.097	787.767	101.57	0.25315	103.61	103.55	103.81	2.0331	0.97154	0.0010477	NaN	65.085	71	25	5	NaN	NaN	NaN
doa10Δ(H)/WT(L) Rep1	TCIHLFQDPNIIFLGGGLPLK	21	1	Unmodified	_TCIHLFQDPNIIFLGGGLPLK_					0	0	0	0	P53090	P53090	P53090	ARO8	Aromatic/aminoadipate aminotransferase 1	MULTI-MATCH			3	785.096	2352.27	72000.9	5.6312	0.004421	-0.12211	-9.59e-05	5.5091	0.0043252	785.43	788.101	101.08	0.68992	103.11	102.85	103.54	2.0331	0.40646	0.00017232	NaN	44.238	204	72	6	NaN	NaN	NaN
doa10Δ(H)/WT(L) Rep1	YNSDPYQLEQSLYHK	15	1	Unmodified	_YNSDPYQLEQSLYHK_					0	0	0	0	P53090	P53090	P53090	ARO8	Aromatic/aminoadipate aminotransferase 1	MULTI-MSMS		629.302	3	628.964	1883.87	76553.1	5.3702	0.0033777	0.92852	0.00058401	6.2988	0.0039617	629.299	631.635	60.28	0.5709	62.413	62.142	62.713	2.1335					268	58	7	0	0	0
doa10Δ(H)/WT(L) Rep1	DITLFIQSLLR	11	0	Unmodified	_DITLFIQSLLR_					0	0	0	0	P47117	P47117	P47117	ARP3	Actin-related protein 3	MSMS	-1	659.893	2	659.89	1317.77	NaN	NaN	NaN	NaN	NaN	NaN	NaN	NaN	NaN	112.33	1	112.76	112.26	113.26	0.42924								0	0	0
doa10Δ(H)/WT(L) Rep1	IAQSELLSGTK	11	1	Unmodified	_IAQSELLSGTK_					0	0	0	0	P47117	P47117	P47117	ARP3	Actin-related protein 3	MULTI-MATCH			2	573.822	1145.63	77932.4	5.4451	0.0031245	-0.93388	-0.00053588	4.5112	0.0025886	573.821	577.829	37.516	0.36373	39.449	39.299	39.663	1.933	0.082985	-0.0013875	NaN	55.98	108	41	4	NaN	NaN	NaN
doa10Δ(H)/WT(L) Rep1	NAVWFGGSLLAQTAEFK	17	1	Unmodified	_NAVWFGGSLLAQTAEFK_					0	0	0	0	P47117	P47117	P47117	ARP3	Actin-related protein 3	MULTI-MSMS		616.662	3	613.653	1837.94	74471.4	5.2979	0.0032511	-0.19694	-0.00012085	5.101	0.0031302	613.653	616.658	96.249	0.41975	98.282	98.095	98.515	2.0331					133	43	5	0	0	0
doa10Δ(H)/WT(L) Rep1	NAVWFGGSLLAQTAEFK	17	1	Unmodified	_NAVWFGGSLLAQTAEFK_					0	0	0	0	P47117	P47117	P47117	ARP3	Actin-related protein 3	MULTI-MATCH			2	919.975	1837.94	63793.4	5.4773	0.005039	-0.065163	-5.99e-05	5.4121	0.004979	920.477	924.484	96.268	0.51478	98.401	98.205	98.72	2.1334	-0.056011	2.76e-05	NaN	59.606	162	53	6	NaN	NaN	NaN
doa10Δ(H)/WT(L) Rep1	QYQSWLGGSILTSLGTFHQLWVGKK	25	2	Unmodified	_QYQSWLGGSILTSLGTFHQLWVGKK_					0	0	0	1	P80428	P80428	P80428	ARP4	Actin-related protein 4	ISO-MSMS	0	709.637	4	709.38	2833.49	NaN	NaN	NaN	-0.09995	-7.09e-05	NaN	NaN	NaN	NaN	108.83	0.43531	110.46	110.13	110.56	1.6322								0	0	0
doa10Δ(H)/WT(L) Rep1	QYQSWLGGSILTSLGTFHQLWVGKK	25	2	Unmodified	_QYQSWLGGSILTSLGTFHQLWVGKK_					0	0	0	1	P80428	P80428	P80428	ARP4	Actin-related protein 4	MULTI-MATCH			4	709.38	2833.49	73406.6	5.154	0.0036561	-0.3636	-0.00025793	4.7904	0.0033982	709.63	713.389	110.11	0.18198	111.64	111.52	111.7	1.5319	0.30246	6.46e-05	NaN	38.267	40	20	6	NaN	NaN	NaN
doa10Δ(H)/WT(L) Rep1	DASLTPLKAVVIDDPPLR	18	1	GlyGly (K)	_DASLTPLK(gl)AVVIDDPPLR_	DASLTPLK(1)AVVIDDPPLR		DASLTPLK(94.2)AVVIDDPPLR		0	1	0	1	P53946	P53946	P53946	ARP5	Actin-related protein 5	MULTI-MSMS		679.05	3	678.713	2033.12	73722.1	5.916	0.0040153	-0.21655	-0.00014697	5.6995	0.0038683	679.047	681.384	79.569	0.77231	81.802	81.413	82.185	2.2335					616	81	10	0	0	0
doa10Δ(H)/WT(L) Rep1	KIQGWLGALTMANLPSWSLGK	21	2	Unmodified	_KIQGWLGALTMANLPSWSLGK_					0	0	0	1	Q12406	Q12406	Q12406	ARP7	Actin-related protein 7	ISO-MSMS	0	758.088	3	757.749	2270.22	NaN	NaN	NaN	0.82044	0.00062169	NaN	NaN	NaN	NaN	103.79	0.53319	105.72	105.58	106.11	1.9329								0	0	0
doa10Δ(H)/WT(L) Rep1	DVKVVNGVGYIK	12	2	GlyGly (K)	_DVK(gl)VVNGVGYIK_	DVK(1)VVNGVGYIK		DVK(54.8)VVNGVGYIK(-54.8)		0	1	0	1	P18634	P18634	P18634	ART10	Arrestin-related trafficking adapter 10	MULTI-MSMS		468.935	3	468.933	1403.78	87787.6	5.2209	0.0024482	-0.089718	-4.21e-05	5.1312	0.0024062	468.933	474.276	45.505	0.3307	47.538	47.506	47.837	2.0333					132	39	5	0	0	0
doa10Δ(H)/WT(L) Rep1	DVKVVNGVGYIK	12	2	GlyGly (K)	_DVK(gl)VVNGVGYIK_	DVK(1)VVNGVGYIK		DVK(62.69)VVNGVGYIK(-62.69)		0	1	0	1	P18634	P18634	P18634	ART10	Arrestin-related trafficking adapter 10	ISO-MSMS	0	468.935	3	468.933	1403.78	NaN	NaN	NaN	-0.066365	-3.11e-05	NaN	NaN	NaN	NaN	45.452	0.27718	47.485	47.229	47.506	2.0333								0	0	0
doa10Δ(H)/WT(L) Rep1	GNSMVTNNEFFNSSNLKVPSK	21	2	GlyGly (K)	_GNSMVTNNEFFNSSNLK(gl)VPSK_	GNSMVTNNEFFNSSNLK(0.999)VPSK(0.001)		GNSMVTNNEFFNSSNLK(29.97)VPSK(-29.97)		0	1	0	1	P18634	P18634	P18634	ART10	Arrestin-related trafficking adapter 10	MULTI-MSMS		810.397	3	810.057	2427.15	66949.2	5.7034	0.00462	-0.19733	-0.00015985	5.506	0.0044602	810.391	815.734	63.979	0.71183	66.112	65.711	66.423	2.1334					413	77	8	0	0	0
doa10Δ(H)/WT(L) Rep1	KPECLKNHTAK	11	3	GlyGly (K)	_KPECLK(gl)NHTAK_					0	1	0	2	P18634	P18634	P18634	ART10	Arrestin-related trafficking adapter 10	MULTI-MATCH			3	480.586	1438.74	88767.1	4.8405	0.0023263	0.50294	0.00024171	5.3434	0.002568	480.586	488.6	6.9317	0.088514	7.6618	7.6464	7.7349	0.73012	0.15562	0.0011224	NaN	67.08	23	7	5	NaN	NaN	NaN
doa10Δ(H)/WT(L) Rep1	VKPGSYNYSFQFDKFPR	17	2	GlyGly (K)	_VKPGSYNYSFQFDK(gl)FPR_					0	1	0	2	P18634	P18634	P18634	ART10	Arrestin-related trafficking adapter 10	MULTI-MATCH			4	549.273	2193.06	80360.5	5.6194	0.0030866	0.59029	0.00032423	6.2097	0.0034108	549.524	553.531	61.224	0.43701	63.357	63.071	63.508	2.1335	-0.80205	0.0011911	NaN	41.482	195	45	8	NaN	NaN	NaN
doa10Δ(H)/WT(L) Rep1	VPSKDVKVVNGVGYIK	16	3	GlyGly (K)	_VPSK(gl)DVKVVNGVGYIK_					0	1	0	2	P18634	P18634	P18634	ART10	Arrestin-related trafficking adapter 10	MULTI-MATCH			4	454.764	1815.03	87742.8	5.3431	0.0024299	0.28027	0.00012746	5.6234	0.0025573	454.764	461.025	37.725	0.25974	39.658	39.527	39.787	1.933	0.22383	-0.00030991	NaN	45.614	87	29	5	NaN	NaN	NaN
doa10Δ(H)/WT(L) Rep1	VVNGVGYIKSDR	12	1	GlyGly (K)	_VVNGVGYIK(gl)SDR_	VVNGVGYIK(1)SDR		VVNGVGYIK(64.94)SDR		0	1	0	1	P18634	P18634	P18634	ART10	Arrestin-related trafficking adapter 10	MULTI-MSMS		474.259	3	474.256	1419.75	87223.2	5.1194	0.0024279	-0.026764	-1.27e-05	5.0926	0.0024152	474.256	476.928	32.063	0.98857	33.996	33.545	34.534	1.9329					523	115	7	0	0	0
doa10Δ(H)/WT(L) Rep1	IFPFEKNIR	9	1	GlyGly (K)	_IFPFEK(gl)NIR_	IFPFEK(1)NIR		IFPFEK(93.14)NIR		0	1	0	1	P53244	P53244	P53244	ART5	Arrestin-related trafficking adapter 5	MULTI-MSMS		429.245	3	426.572	1276.69	91008.9	5.0926	0.0021724	-0.13714	-5.85e-05	4.9555	0.0021139	426.571	429.243	56.36	2.1468	58.394	57.149	59.296	2.0333					872	228	8	0	0	0
doa10Δ(H)/WT(L) Rep1	IFPFEKNIR	9	1	GlyGly (K)	_IFPFEK(gl)NIR_	IFPFEK(1)NIR		IFPFEK(87.64)NIR		0	1	0	1	P53244	P53244	P53244	ART5	Arrestin-related trafficking adapter 5	MSMS	0	426.573	3	426.572	1276.69	NaN	NaN	NaN	NaN	NaN	NaN	NaN	NaN	NaN	55.635	1	57.668	57.168	58.168	2.0333								0	0	0
doa10Δ(H)/WT(L) Rep1	IFPFEKNIR	9	1	GlyGly (K)	_IFPFEK(gl)NIR_	IFPFEK(1)NIR		IFPFEK(82.75)NIR		0	1	0	1	P53244	P53244	P53244	ART5	Arrestin-related trafficking adapter 5	MSMS	0	426.574	3	426.572	1276.69	NaN	NaN	NaN	NaN	NaN	NaN	NaN	NaN	NaN	55.983	1	58.016	57.516	58.516	2.0333								0	0	0
doa10Δ(H)/WT(L) Rep1	IFPFEKNIR	9	1	GlyGly (K)	_IFPFEK(gl)NIR_	IFPFEK(1)NIR		IFPFEK(78.15)NIR		0	1	0	1	P53244	P53244	P53244	ART5	Arrestin-related trafficking adapter 5	MSMS	0	426.573	3	426.572	1276.69	NaN	NaN	NaN	NaN	NaN	NaN	NaN	NaN	NaN	56.326	1	58.36	57.86	58.86	2.0333								0	0	0
doa10Δ(H)/WT(L) Rep1	IFPFEKNIR	9	1	GlyGly (K)	_IFPFEK(gl)NIR_					0	1	0	1	P53244	P53244	P53244	ART5	Arrestin-related trafficking adapter 5	MULTI-MATCH			2	639.354	1276.69	75706.1	5.5761	0.0035651	0.098033	6.27e-05	5.6742	0.0036278	639.354	643.361	56.11	1.112	58.144	57.278	58.39	2.0333	-0.23464	-0.0002708	NaN	96.668	292	121	4	NaN	NaN	NaN
doa10Δ(H)/WT(L) Rep1	IKIFPFEKNIR	11	2	GlyGly (K)	_IKIFPFEK(gl)NIR_	IKIFPFEK(1)NIR		IK(-63.34)IFPFEK(63.34)NIR		0	1	0	2	P53244	P53244	P53244	ART5	Arrestin-related trafficking adapter 5	MULTI-MSMS		506.967	3	506.965	1517.87	85776.2	5.2572	0.0026652	0.01152	5.84e-06	5.2688	0.0026711	506.965	512.307	57.283	0.90902	59.317	59.241	60.15	2.0333					289	95	6	0	0	0
doa10Δ(H)/WT(L) Rep1	IKIFPFEKNIR	11	2	GlyGly (K)	_IKIFPFEK(gl)NIR_	IKIFPFEK(1)NIR		IK(-55.54)IFPFEK(55.54)NIR		0	1	0	2	P53244	P53244	P53244	ART5	Arrestin-related trafficking adapter 5	ISO-MSMS	0	506.968	3	506.965	1517.87	NaN	NaN	NaN	0.56665	0.00028727	NaN	NaN	NaN	NaN	56.904	1.1769	58.937	58.064	59.241	2.0333								0	0	0
doa10Δ(H)/WT(L) Rep1	TAGQIAQTALK	11	1	Unmodified	_TAGQIAQTALK_					0	0	0	0	Q03862	Q03862	Q03862	ARX1	Probable metalloprotease ARX1	MULTI-MSMS		551.32	2	551.317	1100.62	81953.2	5.1432	0.0028355	0.6253	0.00034474	5.7685	0.0031803	551.317	555.324	30.729	0.4124	32.662	32.489	32.901	1.9329					164	42	6	0	0	0
doa10Δ(H)/WT(L) Rep1	AAEPHAVSLAWSADGQTLFAGYTDNVIR	28	0	Unmodified	_AAEPHAVSLAWSADGQTLFAGYTDNVIR_					0	0	0	0	P38011	P38011	P38011	ASC1	Guanine nucleotide-binding protein subunit beta-like protein	ISO-MSMS	-1	987.497	3	987.489	2959.45	NaN	NaN	NaN	0.15617	0.00015421	NaN	NaN	NaN	NaN	90.826	0.72855	92.959	92.462	93.191	2.1332								0	0	0
doa10Δ(H)/WT(L) Rep1	AAEPHAVSLAWSADGQTLFAGYTDNVIR	28	0	Unmodified	_AAEPHAVSLAWSADGQTLFAGYTDNVIR_					0	0	0	0	P38011	P38011	P38011	ASC1	Guanine nucleotide-binding protein subunit beta-like protein	ISO-MSMS	-1	987.829	3	987.489	2959.45	NaN	NaN	NaN	-0.15052	-0.00014864	NaN	NaN	NaN	NaN	90.977	0.30315	93.11	93.048	93.351	2.1332								0	0	0
doa10Δ(H)/WT(L) Rep1	ASMIISGSR	9	0	Unmodified	_ASMIISGSR_					0	0	0	0	P38011	P38011	P38011	ASC1	Guanine nucleotide-binding protein subunit beta-like protein	ISO-MSMS	-1	461.247	2	461.245	920.475	NaN	NaN	NaN	-0.46534	-0.00021463	NaN	NaN	NaN	NaN	29.257	1.1091	31.19	30.785	31.894	1.9329								0	0	0
doa10Δ(H)/WT(L) Rep1	ASMIISGSR	9	0	Oxidation (M)	_ASM(ox)IISGSR_		ASM(1)IISGSR		ASM(77.19)IISGSR	0	0	1	0	P38011	P38011	P38011	ASC1	Guanine nucleotide-binding protein subunit beta-like protein	ISO-MSMS	-1	469.245	2	469.242	936.47	NaN	NaN	NaN	-0.18226	-8.55e-05	NaN	NaN	NaN	NaN	17.505	0.3118	18.837	18.668	18.98	1.3316								0	0	0
doa10Δ(H)/WT(L) Rep1	ASNEVLVLR	9	0	Acetyl (Protein N-term)	_(ac)ASNEVLVLR_					1	0	0	0	P38011	P38011	P38011	ASC1	Guanine nucleotide-binding protein subunit beta-like protein	ISO-MSMS	-1	521.802	2	521.798	1041.58	NaN	NaN	NaN	-0.13377	-6.98e-05	NaN	NaN	NaN	NaN	65.595	0.18133	67.729	67.56	67.741	2.1334								0	0	0
doa10Δ(H)/WT(L) Rep1	ASNEVLVLR	9	0	Acetyl (Protein N-term)	_(ac)ASNEVLVLR_					1	0	0	0	P38011	P38011	P38011	ASC1	Guanine nucleotide-binding protein subunit beta-like protein	ISO-MSMS	-1	521.8	2	521.798	1041.58	NaN	NaN	NaN	-0.078652	-4.1e-05	NaN	NaN	NaN	NaN	65.652	0.31853	67.785	67.741	68.06	2.1334								0	0	0
doa10Δ(H)/WT(L) Rep1	AWNLNQFQIEADFIGHNSNINTLTASPDGTLIASAGK	37	1	Unmodified	_AWNLNQFQIEADFIGHNSNINTLTASPDGTLIASAGK_					0	0	0	0	P38011	P38011	P38011	ASC1	Guanine nucleotide-binding protein subunit beta-like protein	MULTI-MATCH			3	1310.32	3927.94	54315.6	4.4647	0.0058502	0.19964	0.00026159	4.6643	0.0061118	1310.99	1313.66	102.62	0.40693	104.56	104.32	104.73	1.9329	0.021611	-0.0011841	NaN	25.942	190	43	9	NaN	NaN	NaN
doa10Δ(H)/WT(L) Rep1	AWNLNQFQIEADFIGHNSNINTLTASPDGTLIASAGK	37	1	Unmodified	_AWNLNQFQIEADFIGHNSNINTLTASPDGTLIASAGK_					0	0	0	0	P38011	P38011	P38011	ASC1	Guanine nucleotide-binding protein subunit beta-like protein	MULTI-MATCH			4	982.992	3927.94	60790.1	5.0818	0.0049954	0.059757	5.87e-05	5.1416	0.0050541	983.494	985.497	102.64	0.39795	104.57	104.33	104.73	1.9329	0.16998	-9.88e-05	NaN	19.966	203	42	9	NaN	NaN	NaN
doa10Δ(H)/WT(L) Rep1	AWNLNQFQIEADFIGHNSNINTLTASPDGTLIASAGK	37	1	Unmodified	_AWNLNQFQIEADFIGHNSNINTLTASPDGTLIASAGK_					0	0	0	0	P38011	P38011	P38011	ASC1	Guanine nucleotide-binding protein subunit beta-like protein	MULTI-MATCH			4	982.992	3927.94	60613	5.0714	0.0049852	0.59339	0.0005833	5.6648	0.0055685	983.495	985.497	102.87	0.31654	104.8	104.73	105.05	1.9329	0.24481	0.001091	NaN	35.626	130	32	9	NaN	NaN	NaN
doa10Δ(H)/WT(L) Rep1	DGEIMLWNLAAK	12	1	Unmodified	_DGEIMLWNLAAK_					0	0	0	0	P38011	P38011	P38011	ASC1	Guanine nucleotide-binding protein subunit beta-like protein	ISO-MSMS	1	684.861	2	680.85	1359.69	NaN	NaN	NaN	-0.40796	-0.00027776	NaN	NaN	NaN	NaN	89.288	0.56758	91.421	91.172	91.74	2.1332								0	0	0
doa10Δ(H)/WT(L) Rep1	DKTLISWK	8	2	Unmodified	_DKTLISWK_					0	0	0	1	P38011	P38011	P38011	ASC1	Guanine nucleotide-binding protein subunit beta-like protein	MULTI-MATCH			2	495.785	989.555	84885.3	5.3259	0.0026405	-0.38477	-0.00019076	4.9411	0.0024497	495.784	503.799	46.78	0.85627	48.813	48.419	49.275	2.0333	0.077323	-0.00011736	NaN	109.44	331	87	6	NaN	NaN	NaN
doa10Δ(H)/WT(L) Rep1	DKTLISWKLTGDDQK	15	3	GlyGly (K)	_DKTLISWK(gl)LTGDDQK_	DKTLISWK(1)LTGDDQK		DK(-72.07)TLISWK(34.39)LTGDDQK(-34.39)		0	1	0	2	P38011	P38011	P38011	ASC1	Guanine nucleotide-binding protein subunit beta-like protein	MULTI-MSMS		629.345	3	621.327	1860.96	76300	5.3942	0.0033515	0.26302	0.00016342	5.6572	0.003515	621.327	629.341	55.88	0.94921	57.914	57.538	58.487	2.0333					369	101	7	0	0	0
doa10Δ(H)/WT(L) Rep1	GTLEGHNGWVTSLATSAGQPNLLLSASR	28	0	Unmodified	_GTLEGHNGWVTSLATSAGQPNLLLSASR_					0	0	0	0	P38011	P38011	P38011	ASC1	Guanine nucleotide-binding protein subunit beta-like protein	ISO-MSMS	-1	946.828	3	946.49	2836.45	NaN	NaN	NaN	0.00847	8.02e-06	NaN	NaN	NaN	NaN	84.035	1.4153	86.268	85.523	86.938	2.2335								0	0	0
doa10Δ(H)/WT(L) Rep1	LTGDDQKFGVPVR	13	1	GlyGly (K)	_LTGDDQK(gl)FGVPVR_	LTGDDQK(1)FGVPVR		LTGDDQK(77.74)FGVPVR		0	1	0	1	P38011	P38011	P38011	ASC1	Guanine nucleotide-binding protein subunit beta-like protein	MULTI-MSMS		518.612	3	515.939	1544.79	83803.1	5.3348	0.0027524	0.065021	3.35e-05	5.3998	0.002786	515.939	518.61	42.787	0.67269	44.82	44.51	45.183	2.0333					520	69	10	0	0	0
doa10Δ(H)/WT(L) Rep1	LTGDDQKFGVPVR	13	1	GlyGly (K)	_LTGDDQK(gl)FGVPVR_					0	1	0	1	P38011	P38011	P38011	ASC1	Guanine nucleotide-binding protein subunit beta-like protein	MULTI-MATCH			2	773.405	1544.79	71060.8	5.8344	0.0045123	0.2509	0.00019405	6.0853	0.0047064	773.906	777.412	42.796	0.37731	44.829	44.67	45.047	2.0333	0.20397	-0.00018972	NaN	58.781	103	37	5	NaN	NaN	NaN
doa10Δ(H)/WT(L) Rep1	LWDVATGETYQR	12	0	Unmodified	_LWDVATGETYQR_					0	0	0	0	P38011	P38011	P38011	ASC1	Guanine nucleotide-binding protein subunit beta-like protein	ISO-MSMS	-1	719.856	2	719.852	1437.69	NaN	NaN	NaN	0.19327	0.00013913	NaN	NaN	NaN	NaN	56.6	0.65626	58.633	58.364	59.02	2.0333								0	0	0
doa10Δ(H)/WT(L) Rep1	SDVMSVDIDKK	11	2	Unmodified	_SDVMSVDIDKK_					0	0	0	1	P38011	P38011	P38011	ASC1	Guanine nucleotide-binding protein subunit beta-like protein	MULTI-MSMS		626.828	2	618.811	1235.61	76464.2	5.4547	0.0033754	-0.29234	-0.0001809	5.1623	0.0031945	618.811	626.825	36.244	0.66156	38.277	37.98	38.641	2.0331					358	66	8	0	0	0
doa10Δ(H)/WT(L) Rep1	SDVMSVDIDKK	11	2	Unmodified	_SDVMSVDIDKK_					0	0	0	1	P38011	P38011	P38011	ASC1	Guanine nucleotide-binding protein subunit beta-like protein	MULTI-MSMS		412.879	3	412.876	1235.61	89124	5.4632	0.0022556	-0.35208	-0.00014537	5.1111	0.0021103	412.876	418.219	36.233	0.80485	38.266	38.046	38.851	2.0331					468	83	10	0	0	0
doa10Δ(H)/WT(L) Rep1	SDVMSVDIDKK	11	2	Oxidation (M)	_SDVM(ox)SVDIDKK_		SDVM(1)SVDIDKK		SDVM(71.15)SVDIDKK	0	0	1	1	P38011	P38011	P38011	ASC1	Guanine nucleotide-binding protein subunit beta-like protein	MULTI-MSMS		423.552	3	418.208	1251.6	92950.3	5.4752	0.0022898	-0.026267	-1.1e-05	5.4489	0.0022788	418.208	423.551	22.795	0.34055	24.528	24.381	24.721	1.7324					181	34	8	0	0	0
doa10Δ(H)/WT(L) Rep1	TLISWKLTGDDQK	13	2	GlyGly (K)	_TLISWK(gl)LTGDDQK_	TLISWK(1)LTGDDQK		TLISWK(60.37)LTGDDQK(-60.37)		0	1	0	1	P38011	P38011	P38011	ASC1	Guanine nucleotide-binding protein subunit beta-like protein	MULTI-MSMS		540.289	3	540.286	1617.84	80306.2	5.7599	0.003112	-0.30094	-0.0001626	5.4589	0.0029494	540.62	545.629	59.328	1.1359	61.361	60.894	62.03	2.0333					527	119	8	0	0	0
doa10Δ(H)/WT(L) Rep1	TLISWKLTGDDQK	13	2	GlyGly (K)	_TLISWK(gl)LTGDDQK_					0	1	0	1	P38011	P38011	P38011	ASC1	Guanine nucleotide-binding protein subunit beta-like protein	MULTI-MATCH			2	809.925	1617.84	68490.4	5.9678	0.0048335	-0.018332	-1.48e-05	5.9495	0.0048186	809.925	817.939	59.321	0.60302	61.355	61.044	61.647	2.0333	-0.14995	-0.00062005	NaN	63.091	180	61	4	NaN	NaN	NaN
doa10Δ(H)/WT(L) Rep1	VFSLDPQYLVDDLRPEFAGYSK	22	1	Unmodified	_VFSLDPQYLVDDLRPEFAGYSK_					0	0	0	1	P38011	P38011	P38011	ASC1	Guanine nucleotide-binding protein subunit beta-like protein	MULTI-MSMS		856.774	3	853.764	2558.27	64621.5	5.1733	0.0044168	0.21267	0.00018157	5.386	0.0045983	854.098	856.769	103.66	0.81547	105.59	105.12	105.93	1.9329					507	86	10	0	0	0
doa10Δ(H)/WT(L) Rep1	VVPNEKADDDSVTIISAGNDK	21	2	Unmodified	_VVPNEKADDDSVTIISAGNDK_					0	0	0	1	P38011	P38011	P38011	ASC1	Guanine nucleotide-binding protein subunit beta-like protein	MULTI-MSMS		730.037	3	729.697	2186.07	70559	5.8196	0.0042465	0.012146	8.86e-06	5.8317	0.0042554	729.697	735.04	44.692	0.79144	46.726	46.333	47.125	2.0333					390	83	7	0	0	0
doa10Δ(H)/WT(L) Rep1	VVPNEKADDDSVTIISAGNDK	21	2	GlyGly (K)	_VVPNEK(gl)ADDDSVTIISAGNDK_	VVPNEK(0.993)ADDDSVTIISAGNDK(0.007)		VVPNEK(21.26)ADDDSVTIISAGNDK(-21.26)		0	1	0	1	P38011	P38011	P38011	ASC1	Guanine nucleotide-binding protein subunit beta-like protein	MULTI-MSMS		767.716	3	767.712	2300.11	68537.6	5.5159	0.0042346	0.15351	0.00011785	5.6694	0.0043525	768.046	773.054	45.308	0.68181	47.342	47.015	47.697	2.0333					371	78	7	0	0	0
doa10Δ(H)/WT(L) Rep1	VWTIKGQCLATLLGHNDWVSQVR	23	1	GlyGly (K)	_VWTIK(gl)GQCLATLLGHNDWVSQVR_	VWTIK(1)GQCLATLLGHNDWVSQVR		VWTIK(41.41)GQCLATLLGHNDWVSQVR		0	1	0	1	P38011	P38011	P38011	ASC1	Guanine nucleotide-binding protein subunit beta-like protein	MULTI-MSMS		702.126	4	699.616	2794.43	71629.4	5.6189	0.0039311	1.1895	0.00083219	6.8084	0.0047632	700.118	701.871	87.533	0.11709	89.767	89.716	89.833	2.2335					48	12	7	0	0	0
doa10Δ(H)/WT(L) Rep1	VWTIKGQCLATLLGHNDWVSQVR	23	1	GlyGly (K)	_VWTIK(gl)GQCLATLLGHNDWVSQVR_	VWTIK(1)GQCLATLLGHNDWVSQVR		VWTIK(88)GQCLATLLGHNDWVSQVR		0	1	0	1	P38011	P38011	P38011	ASC1	Guanine nucleotide-binding protein subunit beta-like protein	MULTI-MSMS		699.87	4	699.616	2794.43	70925.2	5.6894	0.0039804	0.51443	0.0003599	6.2038	0.0043403	699.867	701.87	87.789	0.43153	89.922	89.83	90.262	2.1332					443	45	13	0	0	0
doa10Δ(H)/WT(L) Rep1	VWTIKGQCLATLLGHNDWVSQVR	23	1	GlyGly (K)	_VWTIK(gl)GQCLATLLGHNDWVSQVR_	VWTIK(1)GQCLATLLGHNDWVSQVR		VWTIK(115.42)GQCLATLLGHNDWVSQVR		0	1	0	1	P38011	P38011	P38011	ASC1	Guanine nucleotide-binding protein subunit beta-like protein	MULTI-MSMS		699.87	4	699.616	2794.43	70925.1	5.749	0.0040221	-0.60822	-0.00042552	5.1408	0.0035966	699.866	701.87	88.179	0.84443	90.312	90.159	91.003	2.1332					813	93	15	0	0	0
doa10Δ(H)/WT(L) Rep1	VWTIKGQCLATLLGHNDWVSQVR	23	1	GlyGly (K)	_VWTIK(gl)GQCLATLLGHNDWVSQVR_	VWTIK(1)GQCLATLLGHNDWVSQVR		VWTIK(100.39)GQCLATLLGHNDWVSQVR		0	1	0	1	P38011	P38011	P38011	ASC1	Guanine nucleotide-binding protein subunit beta-like protein	MULTI-MSMS		700.121	4	699.616	2794.43	70940.7	5.7106	0.0039952	-0.21104	-0.00014765	5.4996	0.0038476	699.866	701.87	89.05	0.44072	91.184	90.834	91.275	2.1332					334	49	12	0	0	0
doa10Δ(H)/WT(L) Rep1	VWTIKGQCLATLLGHNDWVSQVR	23	1	GlyGly (K)	_VWTIK(gl)GQCLATLLGHNDWVSQVR_	VWTIK(1)GQCLATLLGHNDWVSQVR		VWTIK(68.42)GQCLATLLGHNDWVSQVR		0	1	0	1	P38011	P38011	P38011	ASC1	Guanine nucleotide-binding protein subunit beta-like protein	MULTI-MSMS		699.87	4	699.616	2794.43	71508.2	5.6696	0.0039665	0.17076	0.00011947	5.8403	0.004086	699.867	701.87	89.268	0.3152	91.401	91.292	91.607	2.1332					161	32	10	0	0	0
doa10Δ(H)/WT(L) Rep1	VWTIKGQCLATLLGHNDWVSQVR	23	1	GlyGly (K)	_VWTIK(gl)GQCLATLLGHNDWVSQVR_	VWTIK(1)GQCLATLLGHNDWVSQVR		VWTIK(88)GQCLATLLGHNDWVSQVR		0	1	0	1	P38011	P38011	P38011	ASC1	Guanine nucleotide-binding protein subunit beta-like protein	MULTI-MSMS		700.121	4	699.616	2794.43	71997.9	5.6291	0.0039382	-0.26045	-0.00018221	5.3686	0.003756	700.117	701.87	89.628	0.27594	91.761	91.598	91.874	2.1332					123	28	9	0	0	0
doa10Δ(H)/WT(L) Rep1	VWTIKGQCLATLLGHNDWVSQVR	23	1	GlyGly (K)	_VWTIK(gl)GQCLATLLGHNDWVSQVR_					0	1	0	1	P38011	P38011	P38011	ASC1	Guanine nucleotide-binding protein subunit beta-like protein	MULTI-MATCH			3	932.485	2794.43	58095.4	5.4772	0.0051074	1.6159	0.0015068	7.0931	0.0066142	932.822	935.493	89.188	0.091881	91.321	91.292	91.384	2.1332	0.766	0.0040879	NaN	55.453	21	9	5	NaN	NaN	NaN
doa10Δ(H)/WT(L) Rep1	VWTIKGQCLATLLGHNDWVSQVR	23	1	GlyGly (K)	_VWTIK(gl)GQCLATLLGHNDWVSQVR_					0	1	0	1	P38011	P38011	P38011	ASC1	Guanine nucleotide-binding protein subunit beta-like protein	MULTI-MATCH			4	699.616	2794.43	71171.2	5.6391	0.0039452	-0.10548	-7.38e-05	5.5336	0.0038714	699.866	701.87	87.63	0.20052	89.863	89.782	89.982	2.2335	-0.27363	0.0012351	NaN	114.53	132	22	10	NaN	NaN	NaN
doa10Δ(H)/WT(L) Rep1	VWTIKGQCLATLLGHNDWVSQVR	23	1	GlyGly (K)	_VWTIK(gl)GQCLATLLGHNDWVSQVR_					0	1	0	1	P38011	P38011	P38011	ASC1	Guanine nucleotide-binding protein subunit beta-like protein	MULTI-MATCH			4	699.616	2794.43	71629.4	5.6834	0.0039762	1.0331	0.00072275	6.7164	0.0046989	699.867	701.871	89.186	0.12288	91.32	91.234	91.356	2.1332	-0.13133	0.0032374	NaN	89.507	59	13	7	NaN	NaN	NaN
doa10Δ(H)/WT(L) Rep1	YWLAAATATGIK	12	1	Unmodified	_YWLAAATATGIK_					0	0	0	0	P38011	P38011	P38011	ASC1	Guanine nucleotide-binding protein subunit beta-like protein	MULTI-MSMS		633.852	2	633.348	1264.68	75734.6	5.219	0.0033055	-0.10559	-6.69e-05	5.1135	0.0032386	633.348	637.355	65.709	0.024078	67.842	67.831	67.855	2.1334					8	2	4	0	0	0
doa10Δ(H)/WT(L) Rep1	YWLAAATATGIK	12	1	Unmodified	_YWLAAATATGIK_					0	0	0	0	P38011	P38011	P38011	ASC1	Guanine nucleotide-binding protein subunit beta-like protein	MULTI-MSMS		633.352	2	633.348	1264.68	74665.1	5.1054	0.0032335	0.037111	2.35e-05	5.1425	0.003257	633.348	637.355	66.087	0.85143	68.22	67.998	68.849	2.1334					352	97	10	0	0	0
doa10Δ(H)/WT(L) Rep1	YWLAAATATGIK	12	1	Unmodified	_YWLAAATATGIK_					0	0	0	0	P38011	P38011	P38011	ASC1	Guanine nucleotide-binding protein subunit beta-like protein	ISO-MSMS	1	637.359	2	633.348	1264.68	NaN	NaN	NaN	0.2405	0.00015232	NaN	NaN	NaN	NaN	66.295	0.91176	68.428	68.33	69.242	2.1334								0	0	0
doa10Δ(H)/WT(L) Rep1	YWLAAATATGIK	12	1	Unmodified	_YWLAAATATGIK_					0	0	0	0	P38011	P38011	P38011	ASC1	Guanine nucleotide-binding protein subunit beta-like protein	ISO-MSMS	1	637.358	2	633.348	1264.68	NaN	NaN	NaN	0.33995	0.0002153	NaN	NaN	NaN	NaN	66.811	0.40228	68.944	68.84	69.242	2.1334								0	0	0
doa10Δ(H)/WT(L) Rep1	YWLAAATATGIK	12	1	Unmodified	_YWLAAATATGIK_					0	0	0	0	P38011	P38011	P38011	ASC1	Guanine nucleotide-binding protein subunit beta-like protein	MSMS	0	633.351	2	633.348	1264.68	NaN	NaN	NaN	NaN	NaN	NaN	NaN	NaN	NaN	66.042	1	68.176	67.676	68.676	2.1334								0	0	0
doa10Δ(H)/WT(L) Rep1	YWLAAATATGIK	12	1	Unmodified	_YWLAAATATGIK_					0	0	0	0	P38011	P38011	P38011	ASC1	Guanine nucleotide-binding protein subunit beta-like protein	MULTI-SECPEP		637.359	2	633.348	1264.68	75221.4	5.3936	0.003416	0.10149	6.43e-05	5.4951	0.0034803	633.348	637.857	67.237	0.66464	69.37	69.111	69.776	2.1334					183	68	5	0	0	0
doa10Δ(H)/WT(L) Rep1	YWLAAATATGIK	12	1	Unmodified	_YWLAAATATGIK_					0	0	0	0	P38011	P38011	P38011	ASC1	Guanine nucleotide-binding protein subunit beta-like protein	MULTI-MATCH			2	633.348	1264.68	75339.2	5.2154	0.0033031	-0.29901	-0.00018938	4.9163	0.0031138	633.348	637.355	65.74	0.02523	67.873	67.855	67.88	2.1334	-0.24233	0.00012012	NaN	77.185	12	2	6	NaN	NaN	NaN
doa10Δ(H)/WT(L) Rep1	YWLAAATATGIK	12	1	Unmodified	_YWLAAATATGIK_					0	0	0	0	P38011	P38011	P38011	ASC1	Guanine nucleotide-binding protein subunit beta-like protein	MULTI-MATCH			2	633.348	1264.68	77214	5.6045	0.0035496	-0.21535	-0.00013639	5.3891	0.0034132	633.348	637.355	68.761	0.27544	70.895	70.7	70.975	2.1334	1.7399	-6.59e-06	NaN	80.17	76	30	4	NaN	NaN	NaN
doa10Δ(H)/WT(L) Rep1	YWLAAATATGIK	12	1	Unmodified	_YWLAAATATGIK_					0	0	0	0	P38011	P38011	P38011	ASC1	Guanine nucleotide-binding protein subunit beta-like protein	MULTI-MATCH			2	633.348	1264.68	75221.4	5.1962	0.003291	0.065304	4.14e-05	5.2615	0.0033324	633.348	637.355	65.766	0.046654	67.9	67.88	67.927	2.1334	-0.11821	0.00030894	NaN	105.03	20	5	7	NaN	NaN	NaN
doa10Δ(H)/WT(L) Rep1	TYNLLNQIFEK	11	1	Unmodified	_TYNLLNQIFEK_					0	0	0	0	P40467	P40467	P40467	ASG1	Activator of stress genes 1	MULTI-MSMS		695.882	2	691.869	1381.72	71751.4	5.8272	0.0040317	-1.1405	-0.00078911	4.6866	0.0032425	691.868	695.876	88.239	0.64687	90.373	90.11	90.756	2.1332					269	70	6	0	0	0
doa10Δ(H)/WT(L) Rep1	AEWGSDIPTTK	11	1	Unmodified	_AEWGSDIPTTK_					0	0	0	0	P49089	P49089	P49089	ASN1	Asparagine synthetase [glutamine-hydrolyzing] 1	MULTI-MSMS		603.3	2	602.796	1203.58	76636.3	5.4104	0.0032614	1.1175	0.00067362	6.5279	0.003935	602.797	606.804	45.876	0.43081	47.909	47.722	48.153	2.0333					152	46	5	0	0	0
doa10Δ(H)/WT(L) Rep1	ATNDVEPSTYDSK	13	1	Unmodified	_ATNDVEPSTYDSK_					0	0	0	0	P49089	P49089	P49089	ASN1	Asparagine synthetase [glutamine-hydrolyzing] 1	MULTI-MSMS		718.332	2	713.82	1425.63	69891.9	5.5878	0.0039887	1.0185	0.00072704	6.6063	0.0047157	713.821	717.828	24.989	0.35764	26.822	26.631	26.989	1.8327					168	35	7	0	0	0
doa10Δ(H)/WT(L) Rep1	CGIFAAFR	8	0	Unmodified	_CGIFAAFR_					0	0	0	0	P49089	P49089	P49089	ASN1	Asparagine synthetase [glutamine-hydrolyzing] 1	ISO-MSMS	-1	471.239	2	471.237	940.459	NaN	NaN	NaN	0.31036	0.00014625	NaN	NaN	NaN	NaN	66.298	0.69055	68.431	68.221	68.912	2.1334								0	0	0
doa10Δ(H)/WT(L) Rep1	DPIGITTLYMGR	12	0	Unmodified	_DPIGITTLYMGR_					0	0	0	0	P49089	P49089	P49089	ASN1	Asparagine synthetase [glutamine-hydrolyzing] 1	ISO-MSMS	-1	668.855	2	668.85	1335.69	NaN	NaN	NaN	-0.36195	-0.00024209	NaN	NaN	NaN	NaN	79.356	0.55778	81.589	81.326	81.883	2.2335								0	0	0
doa10Δ(H)/WT(L) Rep1	HRGPDWSGNAIK	12	1	Unmodified	_HRGPDWSGNAIK_					0	0	0	1	P49089	P49089	P49089	ASN1	Asparagine synthetase [glutamine-hydrolyzing] 1	MULTI-MATCH			3	446.562	1336.66	92465.9	5.4513	0.0024343	-0.59842	-0.00026723	4.8528	0.0021671	446.562	449.233	23.68	0.35523	25.513	25.285	25.64	1.8327	-0.076396	-0.00069063	NaN	65.234	97	35	5	NaN	NaN	NaN
doa10Δ(H)/WT(L) Rep1	LHTAGWTSLHSFAIGLPNAPDLQAAR	26	0	Unmodified	_LHTAGWTSLHSFAIGLPNAPDLQAAR_					0	0	0	0	P49089	P49089	P49089	ASN1	Asparagine synthetase [glutamine-hydrolyzing] 1	ISO-MSMS	-1	687.118	4	686.862	2743.42	NaN	NaN	NaN	0.2232	0.0001533	NaN	NaN	NaN	NaN	80.693	0.43542	82.927	82.656	83.091	2.2335								0	0	0
doa10Δ(H)/WT(L) Rep1	LKFDALFPQK	10	2	GlyGly (K)	_LK(gl)FDALFPQK_	LK(1)FDALFPQK		LK(35.27)FDALFPQK(-35.27)		0	1	0	1	P49089	P49089	P49089	ASN1	Asparagine synthetase [glutamine-hydrolyzing] 1	MULTI-MSMS		440.918	3	440.915	1319.72	89708.4	5.1	0.0022487	-0.36778	-0.00016216	4.7322	0.0020865	440.915	446.258	65.815	0.22473	67.948	67.757	67.982	2.1334					58	27	5	0	0	0
doa10Δ(H)/WT(L) Rep1	SSASPKTVYFASELK	15	2	GlyGly (K)	_SSASPK(gl)TVYFASELK_					0	1	0	1	P49089	P49089	P49089	ASN1	Asparagine synthetase [glutamine-hydrolyzing] 1	MULTI-MATCH			3	576.965	1727.87	74189.1	5.1167	0.0029522	0.30604	0.00017657	5.4227	0.0031287	577.3	582.308	49.461	0.10496	51.595	51.568	51.673	2.1335	0.179	-0.00029227	NaN	62.69	26	10	4	NaN	NaN	NaN
doa10Δ(H)/WT(L) Rep1	TVADTVMR	8	0	Unmodified	_TVADTVMR_					0	0	0	0	P49089	P49089	P49089	ASN1	Asparagine synthetase [glutamine-hydrolyzing] 1	ISO-MSMS	-1	446.734	2	446.731	891.448	NaN	NaN	NaN	-0.067262	-3e-05	NaN	NaN	NaN	NaN	29.596	0.68891	31.529	31.112	31.801	1.9329								0	0	0
doa10Δ(H)/WT(L) Rep1	TVYFASELK	9	1	Unmodified	_TVYFASELK_					0	0	0	0	P49089	P49089	P49089	ASN1	Asparagine synthetase [glutamine-hydrolyzing] 1	MULTI-MSMS		529.284	2	529.282	1056.55	81421.7	5.5338	0.002929	-0.12832	-6.79e-05	5.4055	0.002861	529.282	533.289	52.811	0.9889	54.944	54.546	55.535	2.1335					465	102	7	0	0	0
doa10Δ(H)/WT(L) Rep1	YLDGMFAWTLYDAK	14	1	Unmodified	_YLDGMFAWTLYDAK_					0	0	0	0	P49089	P49089	P49089	ASN1	Asparagine synthetase [glutamine-hydrolyzing] 1	MULTI-MSMS		847.905	2	847.4	1692.79	65653.4	5.2419	0.004442	-0.2482	-0.00021032	4.9937	0.0042317	847.4	851.407	101.36	1.1721	103.39	103.05	104.22	2.0331					642	123	10	0	0	0
doa10Δ(H)/WT(L) Rep1	YLDGMFAWTLYDAK	14	1	Unmodified	_YLDGMFAWTLYDAK_					0	0	0	0	P49089	P49089	P49089	ASN1	Asparagine synthetase [glutamine-hydrolyzing] 1	MULTI-MATCH			3	565.269	1692.79	86630.8	5.2527	0.0029692	0.044282	2.5e-05	5.297	0.0029942	565.269	567.94	101.56	0.14706	103.59	103.55	103.7	2.0331	-0.15434	-0.00061945	NaN	65.043	32	14	5	NaN	NaN	NaN
doa10Δ(H)/WT(L) Rep1	ADWGCAEDPSGR	12	0	Unmodified	_ADWGCAEDPSGR_					0	0	0	0	P49089;P49090	P49089;P49090	P49089	ASN1;ASN2	Asparagine synthetase [glutamine-hydrolyzing] 1;Asparagine synthetase [glutamine-hydrolyzing] 2	ISO-MSMS	-1	660.772	2	660.767	1319.52	NaN	NaN	NaN	-0.2974	-0.00019651	NaN	NaN	NaN	NaN	36.186	0.5658	38.219	37.972	38.537	2.0331								0	0	0
doa10Δ(H)/WT(L) Rep1	STMAWGLEAR	10	0	Unmodified	_STMAWGLEAR_					0	0	0	0	P49089;P49090	P49089;P49090	P49089	ASN1;ASN2	Asparagine synthetase [glutamine-hydrolyzing] 1;Asparagine synthetase [glutamine-hydrolyzing] 2	ISO-MSMS	-1	561.276	2	561.274	1120.53	NaN	NaN	NaN	-0.22097	-0.00012402	NaN	NaN	NaN	NaN	55.967	0.88309	58.001	57.686	58.569	2.0333								0	0	0
doa10Δ(H)/WT(L) Rep1	DPIGVVTLYMGR	12	0	Unmodified	_DPIGVVTLYMGR_					0	0	0	0	P49090	P49090	P49090	ASN2	Asparagine synthetase [glutamine-hydrolyzing] 2	ISO-MSMS	-1	660.857	2	660.853	1319.69	NaN	NaN	NaN	0.053147	3.51e-05	NaN	NaN	NaN	NaN	86.948	0.56957	89.182	88.93	89.499	2.2335								0	0	0
doa10Δ(H)/WT(L) Rep1	QLAGIDDQGHLHTSGWSR	18	0	Unmodified	_QLAGIDDQGHLHTSGWSR_					0	0	0	0	P49090	P49090	P49090	ASN2	Asparagine synthetase [glutamine-hydrolyzing] 2	ISO-MSMS	-1	495.748	4	495.244	1976.95	NaN	NaN	NaN	0.066345	3.29e-05	NaN	NaN	NaN	NaN	47.574	0.86877	49.607	49.172	50.041	2.0333								0	0	0
doa10Δ(H)/WT(L) Rep1	TAADTVMR	8	0	Unmodified	_TAADTVMR_					0	0	0	0	P49090	P49090	P49090	ASN2	Asparagine synthetase [glutamine-hydrolyzing] 2	ISO-MSMS	-1	432.719	2	432.716	863.417	NaN	NaN	NaN	0.1772	7.67e-05	NaN	NaN	NaN	NaN	19.667	0.52328	21.099	20.896	21.419	1.4318								0	0	0
doa10Δ(H)/WT(L) Rep1	YLDGMFAFCLYDSK	14	1	Unmodified	_YLDGMFAFCLYDSK_					0	0	0	0	P49090	P49090	P49090	ASN2	Asparagine synthetase [glutamine-hydrolyzing] 2	MULTI-MATCH			2	865.384	1728.75	66968.6	5.3133	0.004598	-0.23803	-0.00020599	5.0753	0.0043921	865.885	869.892	98.694	0.14655	100.83	100.74	100.88	2.1334	0.41799	0.0003967	NaN	61.409	30	15	4	NaN	NaN	NaN
doa10Δ(H)/WT(L) Rep1	YLDGMFAFCLYDSKK	15	2	Unmodified	_YLDGMFAFCLYDSKK_					0	0	0	1	P49090	P49090	P49090	ASN2	Asparagine synthetase [glutamine-hydrolyzing] 2	MULTI-MSMS		620.293	3	619.957	1856.85	78002.5	5.2916	0.0032806	1.057	0.00065527	6.3485	0.0039358	619.957	625.634	86.7	0.37266	88.934	88.661	89.033	2.2335					111	39	5	0	0	0
doa10Δ(H)/WT(L) Rep1	TNANSLDSFNVR	12	0	Unmodified	_TNANSLDSFNVR_					0	0	0	0	P38986	P38986	P38986	ASP1	L-asparaginase 1	ISO-MSMS	-1	669.33	2	669.326	1336.64	NaN	NaN	NaN	0.4611	0.00030862	NaN	NaN	NaN	NaN	47.773	0.42924	49.807	49.612	50.041	2.0333								0	0	0
doa10Δ(H)/WT(L) Rep1	LSQECDSKTEIASDHSK	17	2	GlyGly (K)	_LSQECDSK(gl)TEIASDHSK_					0	1	0	1	P35193	P35193	P35193	ATG19	Autophagy-related protein 19	MULTI-MATCH			4	512.985	2047.91	82949	5.0958	0.0026141	0.12439	6.38e-05	5.2202	0.0026779	512.985	516.992	19.315	0.48451	20.746	20.496	20.981	1.4318	-0.53061	0.0003935	NaN	51.798	245	51	10	NaN	NaN	NaN
doa10Δ(H)/WT(L) Rep1	AQPTEVSSILEER	13	0	Unmodified	_AQPTEVSSILEER_					0	0	0	0	P07251	P07251	P07251	ATP1	ATP synthase subunit alpha, mitochondrial	ISO-MSMS	-1	729.879	2	729.875	1457.74	NaN	NaN	NaN	-0.28262	-0.00020628	NaN	NaN	NaN	NaN	57.904	0.72371	59.938	59.479	60.203	2.0333								0	0	0
doa10Δ(H)/WT(L) Rep1	GIRPAINVGLSVSR	14	0	Unmodified	_GIRPAINVGLSVSR_					0	0	0	1	P07251	P07251	P07251	ATP1	ATP synthase subunit alpha, mitochondrial	ISO-MSMS	-1	480.291	3	480.288	1437.84	NaN	NaN	NaN	-0.05103	-2.45e-05	NaN	NaN	NaN	NaN	52.053	0.87132	54.186	53.601	54.473	2.1335								0	0	0
doa10Δ(H)/WT(L) Rep1	GIRPAINVGLSVSR	14	0	Unmodified	_GIRPAINVGLSVSR_					0	0	0	1	P07251	P07251	P07251	ATP1	ATP synthase subunit alpha, mitochondrial	ISO-MSMS	-1	480.29	3	480.288	1437.84	NaN	NaN	NaN	-0.071693	-3.44e-05	NaN	NaN	NaN	NaN	52.325	1.3408	54.458	54.385	55.726	2.1335								0	0	0
doa10Δ(H)/WT(L) Rep1	GIRPAINVGLSVSR	14	0	Unmodified	_GIRPAINVGLSVSR_					0	0	0	1	P07251	P07251	P07251	ATP1	ATP synthase subunit alpha, mitochondrial	ISO-MSMS	-1	480.291	3	480.288	1437.84	NaN	NaN	NaN	-0.41841	-0.00020096	NaN	NaN	NaN	NaN	54.525	0.58936	56.558	56.345	56.934	2.0333								0	0	0
doa10Δ(H)/WT(L) Rep1	GVSDEANLNETGR	13	0	Unmodified	_GVSDEANLNETGR_					0	0	0	0	P07251	P07251	P07251	ATP1	ATP synthase subunit alpha, mitochondrial	ISO-MSMS	-1	681.825	2	681.318	1360.62	NaN	NaN	NaN	-0.36023	-0.00024543	NaN	NaN	NaN	NaN	29.594	0.39017	31.527	31.383	31.773	1.9329								0	0	0
doa10Δ(H)/WT(L) Rep1	IGEFESSFLSYLK	13	1	Unmodified	_IGEFESSFLSYLK_					0	0	0	0	P07251	P07251	P07251	ATP1	ATP synthase subunit alpha, mitochondrial	MULTI-MSMS		760.391	2	760.388	1518.76	70182.3	5.6347	0.0042846	-0.25004	-0.00019013	5.3847	0.0040944	760.387	764.394	96.601	0.66127	98.734	98.402	99.064	2.1334					399	69	9	0	0	0
doa10Δ(H)/WT(L) Rep1	IKGVSDEANLNETGR	15	1	Unmodified	_IKGVSDEANLNETGR_					0	0	0	1	P07251	P07251	P07251	ATP1	ATP synthase subunit alpha, mitochondrial	MULTI-MSMS		537.949	3	534.941	1601.8	80887.3	5.1805	0.0027713	-0.30424	-0.00016275	4.8762	0.0026085	534.941	537.612	30.352	0.42522	32.285	32.063	32.489	1.9329					204	42	7	0	0	0
doa10Δ(H)/WT(L) Rep1	KLYCVYVAVGQK	12	2	Unmodified	_KLYCVYVAVGQK_					0	0	0	1	P07251	P07251	P07251	ATP1	ATP synthase subunit alpha, mitochondrial	MULTI-MSMS		481.941	3	476.595	1426.76	86001.1	5.2717	0.0025125	0.011231	5.35e-06	5.2829	0.0025178	476.595	481.938	45.651	2.099	47.685	46.961	49.06	2.0333					837	230	8	0	0	0
doa10Δ(H)/WT(L) Rep1	KLYCVYVAVGQK	12	2	Unmodified	_KLYCVYVAVGQK_					0	0	0	1	P07251	P07251	P07251	ATP1	ATP synthase subunit alpha, mitochondrial	MULTI-MSMS		722.908	2	714.389	1426.76	72330.1	5.6107	0.0040082	0.25834	0.00018456	5.869	0.0041927	714.39	722.404	45.286	0.36367	47.319	47.079	47.443	2.0333					116	39	4	0	0	0
doa10Δ(H)/WT(L) Rep1	KLYCVYVAVGQK	12	2	Unmodified	_KLYCVYVAVGQK_					0	0	0	1	P07251	P07251	P07251	ATP1	ATP synthase subunit alpha, mitochondrial	MULTI-MSMS		481.941	3	476.595	1426.76	85177.5	5.2983	0.0025252	-0.014831	-7.07e-06	5.2835	0.0025181	476.93	481.938	45.342	0.54496	47.375	46.961	47.506	2.0333					319	60	7	0	0	0
doa10Δ(H)/WT(L) Rep1	KLYCVYVAVGQK	12	2	Unmodified	_KLYCVYVAVGQK_					0	0	0	1	P07251	P07251	P07251	ATP1	ATP synthase subunit alpha, mitochondrial	MSMS	0	714.392	2	714.389	1426.76	NaN	NaN	NaN	NaN	NaN	NaN	NaN	NaN	NaN	45.508	1	47.541	47.041	48.041	2.0333								0	0	0
doa10Δ(H)/WT(L) Rep1	KLYCVYVAVGQK	12	2	Unmodified	_KLYCVYVAVGQK_					0	0	0	1	P07251	P07251	P07251	ATP1	ATP synthase subunit alpha, mitochondrial	MULTI-MATCH			3	476.595	1426.76	87963.4	5.7185	0.0027254	-0.0048529	-2.31e-06	5.7136	0.0027231	476.93	481.938	47.422	0.16603	49.455	49.349	49.515	2.0333	0.32184	0.00036761	NaN	67.08	53	19	5	NaN	NaN	NaN
doa10Δ(H)/WT(L) Rep1	LFLAQYR	7	0	Unmodified	_LFLAQYR_					0	0	0	0	P07251	P07251	P07251	ATP1	ATP synthase subunit alpha, mitochondrial	ISO-MSMS	-1	455.763	2	455.761	909.507	NaN	NaN	NaN	-0.37649	-0.00017159	NaN	NaN	NaN	NaN	53.224	0.91994	55.358	54.814	55.734	2.1335								0	0	0
doa10Δ(H)/WT(L) Rep1	LYCVYVAVGQK	11	1	Unmodified	_LYCVYVAVGQK_					0	0	0	0	P07251	P07251	P07251	ATP1	ATP synthase subunit alpha, mitochondrial	MULTI-MSMS		650.345	2	650.342	1298.67	72327.1	5.7821	0.0037603	-0.20443	-0.00013295	5.5776	0.0036274	650.342	654.349	55.406	2.2802	57.44	56.951	59.231	2.0333					1144	243	9	0	0	0
doa10Δ(H)/WT(L) Rep1	LYCVYVAVGQK	11	1	Unmodified	_LYCVYVAVGQK_					0	0	0	0	P07251	P07251	P07251	ATP1	ATP synthase subunit alpha, mitochondrial	MULTI-MSMS		654.354	2	650.342	1298.67	73115.3	5.6329	0.0036633	-0.58553	-0.0003808	5.0474	0.0032825	650.844	654.349	57.143	0.27686	59.177	59.01	59.287	2.0333					96	28	7	0	0	0
doa10Δ(H)/WT(L) Rep1	LYCVYVAVGQK	11	1	Unmodified	_LYCVYVAVGQK_					0	0	0	0	P07251	P07251	P07251	ATP1	ATP synthase subunit alpha, mitochondrial	MULTI-MSMS		650.345	2	650.342	1298.67	74696.8	5.8408	0.0037985	-0.80045	-0.00052057	5.0404	0.003278	650.342	654.349	57.299	0.49801	59.332	59.231	59.729	2.0333					276	52	6	0	0	0
doa10Δ(H)/WT(L) Rep1	LYCVYVAVGQK	11	1	Unmodified	_LYCVYVAVGQK_					0	0	0	0	P07251	P07251	P07251	ATP1	ATP synthase subunit alpha, mitochondrial	MULTI-MSMS		654.352	2	650.342	1298.67	75386.5	6.008	0.0039073	-0.32256	-0.00020977	5.6855	0.0036975	650.342	654.349	57.738	0.52906	59.771	59.71	60.239	2.0333					183	55	4	0	0	0
doa10Δ(H)/WT(L) Rep1	LYCVYVAVGQK	11	1	Unmodified	_LYCVYVAVGQK_					0	0	0	0	P07251	P07251	P07251	ATP1	ATP synthase subunit alpha, mitochondrial	MULTI-MSMS		654.855	2	650.342	1298.67	77449	5.8209	0.0037856	0.66056	0.00042959	6.4815	0.0042152	650.342	654.35	62.871	0.27254	65.005	64.914	65.187	2.1334					41	27	3	0	0	0
doa10Δ(H)/WT(L) Rep1	LYCVYVAVGQK	11	1	Unmodified	_LYCVYVAVGQK_					0	0	0	0	P07251	P07251	P07251	ATP1	ATP synthase subunit alpha, mitochondrial	ISO-MSMS	0	650.847	2	650.342	1298.67	NaN	NaN	NaN	-0.55377	-0.00036014	NaN	NaN	NaN	NaN	62.608	0.51862	64.741	64.426	64.945	2.1334								0	0	0
doa10Δ(H)/WT(L) Rep1	LYCVYVAVGQK	11	1	Unmodified	_LYCVYVAVGQK_					0	0	0	0	P07251	P07251	P07251	ATP1	ATP synthase subunit alpha, mitochondrial	MSMS	0	650.347	2	650.342	1298.67	NaN	NaN	NaN	NaN	NaN	NaN	NaN	NaN	NaN	58.452	1	60.485	59.985	60.985	2.0333								0	0	0
doa10Δ(H)/WT(L) Rep1	LYCVYVAVGQK	11	1	Unmodified	_LYCVYVAVGQK_					0	0	0	0	P07251	P07251	P07251	ATP1	ATP synthase subunit alpha, mitochondrial	MSMS	0	650.347	2	650.342	1298.67	NaN	NaN	NaN	NaN	NaN	NaN	NaN	NaN	NaN	59.37	1	61.403	60.903	61.903	2.0333								0	0	0
doa10Δ(H)/WT(L) Rep1	LYCVYVAVGQK	11	1	Unmodified	_LYCVYVAVGQK_					0	0	0	0	P07251	P07251	P07251	ATP1	ATP synthase subunit alpha, mitochondrial	MULTI-MATCH			2	650.342	1298.67	75318.5	5.754	0.0037421	-0.12341	-8.03e-05	5.6306	0.0036618	650.342	654.349	59.839	0.63675	61.872	61.752	62.389	2.0333	-0.64215	-0.00037609	NaN	57.785	124	66	4	NaN	NaN	NaN
doa10Δ(H)/WT(L) Rep1	LYCVYVAVGQK	11	1	Unmodified	_LYCVYVAVGQK_					0	0	0	0	P07251	P07251	P07251	ATP1	ATP synthase subunit alpha, mitochondrial	MULTI-MATCH			2	650.342	1298.67	76543.3	5.8658	0.0038148	0.7381	0.00048002	6.6039	0.0042948	650.342	654.35	61.972	0.44605	64.105	63.895	64.341	2.1335	0.25781	0.00047291	NaN	51.445	111	46	4	NaN	NaN	NaN
doa10Δ(H)/WT(L) Rep1	LYCVYVAVGQK	11	1	Unmodified	_LYCVYVAVGQK_					0	0	0	0	P07251	P07251	P07251	ATP1	ATP synthase subunit alpha, mitochondrial	MULTI-MATCH			2	650.342	1298.67	75560	5.876	0.0038214	0.81191	0.00052802	6.6879	0.0043494	650.342	654.35	61.501	0.46195	63.634	63.424	63.886	2.1335	0.04486	0.00042084	NaN	57.532	133	48	5	NaN	NaN	NaN
doa10Δ(H)/WT(L) Rep1	LYCVYVAVGQK	11	1	Unmodified	_LYCVYVAVGQK_					0	0	0	0	P07251	P07251	P07251	ATP1	ATP synthase subunit alpha, mitochondrial	MULTI-MATCH			3	433.897	1298.67	92975	5.2606	0.0022826	-0.20984	-9.11e-05	5.0508	0.0021915	434.232	436.568	55.446	0.95243	57.48	57.094	58.046	2.0333	0.057903	8.43e-05	NaN	35.178	217	106	4	NaN	NaN	NaN
doa10Δ(H)/WT(L) Rep1	QLSLLLR	7	0	Unmodified	_QLSLLLR_					0	0	0	0	P07251	P07251	P07251	ATP1	ATP synthase subunit alpha, mitochondrial	ISO-MSMS	-1	421.778	2	421.777	841.539	NaN	NaN	NaN	0.061276	2.58e-05	NaN	NaN	NaN	NaN	60.773	0.83474	62.906	62.499	63.334	2.1335								0	0	0
doa10Δ(H)/WT(L) Rep1	RSVHEPVQTGLK	12	1	Unmodified	_RSVHEPVQTGLK_					0	0	0	1	P07251	P07251	P07251	ATP1	ATP synthase subunit alpha, mitochondrial	MULTI-MATCH			3	450.921	1349.74	90835.9	5.1659	0.0023294	-0.13807	-6.23e-05	5.0278	0.0022672	450.921	453.592	16.121	0.31732	17.353	17.172	17.489	1.2313	0.14084	-0.0002924	NaN	86.262	143	32	7	NaN	NaN	NaN
doa10Δ(H)/WT(L) Rep1	SNHNELLTEIR	11	0	Unmodified	_SNHNELLTEIR_					0	0	0	0	P07251	P07251	P07251	ATP1	ATP synthase subunit alpha, mitochondrial	ISO-MSMS	-1	442.568	3	442.565	1324.67	NaN	NaN	NaN	0.090707	4.01e-05	NaN	NaN	NaN	NaN	40.188	0.78505	42.221	41.878	42.663	2.0333								0	0	0
doa10Δ(H)/WT(L) Rep1	STVAQLVQTLEQHDAMK	17	1	Unmodified	_STVAQLVQTLEQHDAMK_					0	0	0	0	P07251	P07251	P07251	ATP1	ATP synthase subunit alpha, mitochondrial	MULTI-MSMS		633.663	3	633.66	1897.96	77317.4	5.5737	0.0035319	-0.021213	-1.34e-05	5.5525	0.0035184	633.66	636.665	84.368	0.58752	86.602	86.264	86.852	2.2335					181	59	6	0	0	0
doa10Δ(H)/WT(L) Rep1	TAVALDTILNQK	12	1	Unmodified	_TAVALDTILNQK_					0	0	0	0	P07251	P07251	P07251	ATP1	ATP synthase subunit alpha, mitochondrial	MULTI-MSMS		647.88	2	643.869	1285.72	76167.3	5.5091	0.0035472	-0.029899	-1.93e-05	5.4792	0.0035279	643.869	647.876	66.474	0.66117	68.608	68.287	68.949	2.1334					379	72	8	0	0	0
doa10Δ(H)/WT(L) Rep1	TGNIVDVPVGPGLLGR	16	0	Unmodified	_TGNIVDVPVGPGLLGR_					0	0	0	0	P07251	P07251	P07251	ATP1	ATP synthase subunit alpha, mitochondrial	ISO-MSMS	-1	782.451	2	782.446	1562.88	NaN	NaN	NaN	0.11447	8.96e-05	NaN	NaN	NaN	NaN	77.311	0.76418	79.544	79.243	80.008	2.2335								0	0	0
doa10Δ(H)/WT(L) Rep1	WNNGSDESK	9	1	Unmodified	_WNNGSDESK_					0	0	0	0	P07251	P07251	P07251	ATP1	ATP synthase subunit alpha, mitochondrial	MULTI-MATCH			2	518.72	1035.43	84027.9	5.0241	0.0026061	-0.28363	-0.00014713	4.7404	0.002459	518.72	522.727	11.255	0.26023	12.185	12.068	12.328	0.93061	-0.64185	-8.18e-05	NaN	56.043	75	25	4	NaN	NaN	NaN
doa10Δ(H)/WT(L) Rep1	AGISYAAYLNVAAQAIR	17	0	Unmodified	_AGISYAAYLNVAAQAIR_					0	0	0	0	P21306	P21306	P21306	ATP15	ATP synthase subunit epsilon, mitochondrial	ISO-MSMS	-1	876.48	2	876.476	1750.94	NaN	NaN	NaN	-0.13523	-0.00011852	NaN	NaN	NaN	NaN	92.432	1.339	94.566	94.184	95.523	2.1332								0	0	0
doa10Δ(H)/WT(L) Rep1	AGISYAAYLNVAAQAIR	17	0	Unmodified	_AGISYAAYLNVAAQAIR_					0	0	0	0	P21306	P21306	P21306	ATP15	ATP synthase subunit epsilon, mitochondrial	ISO-MSMS	-1	584.656	3	584.653	1750.94	NaN	NaN	NaN	0.13592	7.95e-05	NaN	NaN	NaN	NaN	92.439	1.0247	94.573	94.175	95.2	2.1332								0	0	0
doa10Δ(H)/WT(L) Rep1	AGISYAAYLNVAAQAIR	17	0	Unmodified	_AGISYAAYLNVAAQAIR_					0	0	0	0	P21306	P21306	P21306	ATP15	ATP synthase subunit epsilon, mitochondrial	ISO-MSMS	-1	584.656	3	584.653	1750.94	NaN	NaN	NaN	-0.53998	-0.0003157	NaN	NaN	NaN	NaN	93.305	0.2177	95.438	95.401	95.619	2.1332								0	0	0
doa10Δ(H)/WT(L) Rep1	AGISYAAYLNVAAQAIR	17	0	Unmodified	_AGISYAAYLNVAAQAIR_					0	0	0	0	P21306	P21306	P21306	ATP15	ATP synthase subunit epsilon, mitochondrial	ISO-MSMS	-1	584.658	3	584.653	1750.94	NaN	NaN	NaN	-0.19849	-0.00011605	NaN	NaN	NaN	NaN	93.483	0.46443	95.616	95.504	95.969	2.1332								0	0	0
doa10Δ(H)/WT(L) Rep1	KAGISYAAYLNVAAQAIR	18	1	Unmodified	_KAGISYAAYLNVAAQAIR_					0	0	0	1	P21306	P21306	P21306	ATP15	ATP synthase subunit epsilon, mitochondrial	MULTI-MSMS		627.69	3	627.351	1879.03	76565.1	5.7107	0.0035826	-0.089213	-5.6e-05	5.6215	0.0035266	627.685	630.357	79.281	0.41947	81.515	81.229	81.649	2.2335					208	43	7	0	0	0
doa10Δ(H)/WT(L) Rep1	KAGISYAAYLNVAAQAIR	18	1	Unmodified	_KAGISYAAYLNVAAQAIR_					0	0	0	1	P21306	P21306	P21306	ATP15	ATP synthase subunit epsilon, mitochondrial	MULTI-MSMS		627.355	3	627.351	1879.03	76300.5	5.7391	0.0036004	-0.36773	-0.00023069	5.3713	0.0033697	627.685	630.023	79.571	0.59259	81.804	81.64	82.232	2.2335					270	62	9	0	0	0
doa10Δ(H)/WT(L) Rep1	KAGISYAAYLNVAAQAIR	18	1	Unmodified	_KAGISYAAYLNVAAQAIR_					0	0	0	1	P21306	P21306	P21306	ATP15	ATP synthase subunit epsilon, mitochondrial	MULTI-MATCH			3	627.351	1879.03	76116.2	5.4627	0.003427	0.23296	0.00014615	5.6957	0.0035732	627.685	630.357	83.604	1.1601	85.837	85.287	86.447	2.2335	-0.15456	0.00013607	NaN	27.271	364	115	6	NaN	NaN	NaN
doa10Δ(H)/WT(L) Rep1	NGTAASEPTPITK	13	1	Unmodified	_NGTAASEPTPITK_					0	0	0	0	P21306	P21306	P21306	ATP15	ATP synthase subunit epsilon, mitochondrial	MULTI-SECPEP		644.338	2	643.833	1285.65	75562.1	5.7316	0.0036902	0.024629	1.59e-05	5.7562	0.003706	643.833	647.84	22.584	0.3779	24.316	24.143	24.521	1.7324					126	38	5	0	0	0
doa10Δ(H)/WT(L) Rep1	SQTDAFYTQYK	11	1	Unmodified	_SQTDAFYTQYK_					0	0	0	0	P21306	P21306	P21306	ATP15	ATP synthase subunit epsilon, mitochondrial	MULTI-MATCH			2	676.312	1350.61	74442.6	5.3873	0.0036435	0.27749	0.00018767	5.6647	0.0038311	676.312	680.319	45.055	0.45526	47.088	46.879	47.334	2.0333	-0.7134	0.00028226	NaN	77.597	184	48	5	NaN	NaN	NaN
doa10Δ(H)/WT(L) Rep1	TELQTASVLNR	11	0	Unmodified	_TELQTASVLNR_					0	0	0	0	P21306	P21306	P21306	ATP15	ATP synthase subunit epsilon, mitochondrial	ISO-MSMS	-1	616.339	2	616.336	1230.66	NaN	NaN	NaN	0.11635	7.17e-05	NaN	NaN	NaN	NaN	42.301	0.41518	44.334	44.078	44.493	2.0333								0	0	0
doa10Δ(H)/WT(L) Rep1	AADLSSNTKEFINDPR	16	1	GlyGly (K)	_AADLSSNTK(gl)EFINDPR_					0	1	0	1	P81450	P81450	P81450	ATP18	ATP synthase subunit J, mitochondrial	MULTI-MATCH			3	631.31	1890.91	75790.6	4.8907	0.0030875	1.0086	0.00063674	5.8993	0.0037243	631.31	634.316	47.725	0.47079	49.758	49.57	50.041	2.0333	-0.18415	0.00072745	NaN	65.374	257	48	7	NaN	NaN	NaN
doa10Δ(H)/WT(L) Rep1	AHGGFSVFTGVGER	14	0	Unmodified	_AHGGFSVFTGVGER_					0	0	0	0	P00830	P00830	P00830	ATP2	ATP synthase subunit beta, mitochondrial	ISO-MSMS	-1	474.24	3	474.237	1419.69	NaN	NaN	NaN	-0.10105	-4.79e-05	NaN	NaN	NaN	NaN	53.285	0.48745	55.418	55.029	55.516	2.1335								0	0	0
doa10Δ(H)/WT(L) Rep1	FLSQPFAVAEVFTGIPGK	18	1	Unmodified	_FLSQPFAVAEVFTGIPGK_					0	0	0	0	P00830	P00830	P00830	ATP2	ATP synthase subunit beta, mitochondrial	MULTI-MSMS		637.018	3	636.68	1907.02	76131.1	5.3224	0.0033887	0.14721	9.37e-05	5.4696	0.0034824	637.015	639.686	102.56	0.82639	104.49	104.05	104.87	1.9329					288	87	7	0	0	0
doa10Δ(H)/WT(L) Rep1	FTQAGSEVSALLGR	14	0	Unmodified	_FTQAGSEVSALLGR_					0	0	0	0	P00830	P00830	P00830	ATP2	ATP synthase subunit beta, mitochondrial	ISO-MSMS	-1	718.386	2	718.381	1434.75	NaN	NaN	NaN	1.4913	0.0010713	NaN	NaN	NaN	NaN	68.651	0.58866	70.784	70.429	71.017	2.1334								0	0	0
doa10Δ(H)/WT(L) Rep1	GISELGIYPAVDPLDSK	17	1	Unmodified	_GISELGIYPAVDPLDSK_					0	0	0	0	P00830	P00830	P00830	ATP2	ATP synthase subunit beta, mitochondrial	MULTI-MSMS		891.479	2	887.467	1772.92	64094.4	5.6418	0.0050069	0.52601	0.00046682	6.1678	0.0054737	887.468	891.474	83.596	0.6253	85.83	85.484	86.11	2.2335					344	62	7	0	0	0
doa10Δ(H)/WT(L) Rep1	IPSAVGYQPTLATDMGLLQER	21	0	Unmodified	_IPSAVGYQPTLATDMGLLQER_					0	0	0	0	P00830	P00830	P00830	ATP2	ATP synthase subunit beta, mitochondrial	ISO-MSMS	-1	754.063	3	754.06	2259.16	NaN	NaN	NaN	-0.079878	-6.02e-05	NaN	NaN	NaN	NaN	86.598	0.51665	88.831	88.481	88.998	2.2335								0	0	0
doa10Δ(H)/WT(L) Rep1	TIAMDGTEGLVR	12	0	Unmodified	_TIAMDGTEGLVR_					0	0	0	0	P00830	P00830	P00830	ATP2	ATP synthase subunit beta, mitochondrial	ISO-MSMS	-1	631.828	2	631.824	1261.63	NaN	NaN	NaN	0.14864	9.39e-05	NaN	NaN	NaN	NaN	51.97	0.62219	54.103	53.755	54.377	2.1335								0	0	0
doa10Δ(H)/WT(L) Rep1	TVFIQELINNIAK	13	1	Unmodified	_TVFIQELINNIAK_					0	0	0	0	P00830	P00830	P00830	ATP2	ATP synthase subunit beta, mitochondrial	MULTI-MSMS		755.943	2	751.932	1501.85	70238	5.1417	0.0038662	-0.012843	-9.66e-06	5.1289	0.0038566	751.932	755.94	105.77	1.1398	107.6	107.1	108.24	1.8327					550	125	9	0	0	0
doa10Δ(H)/WT(L) Rep1	TVFIQELINNIAK	13	1	Unmodified	_TVFIQELINNIAK_					0	0	0	0	P00830	P00830	P00830	ATP2	ATP synthase subunit beta, mitochondrial	MULTI-MSMS		751.937	2	751.932	1501.85	70390.1	5.1907	0.0039031	-0.096441	-7.25e-05	5.0943	0.0038305	751.932	756.441	105.9	0.55885	107.73	107.69	108.25	1.8327					355	61	8	0	0	0
doa10Δ(H)/WT(L) Rep1	TVFIQELINNIAK	13	1	Unmodified	_TVFIQELINNIAK_					0	0	0	0	P00830	P00830	P00830	ATP2	ATP synthase subunit beta, mitochondrial	MULTI-MATCH			3	501.624	1501.85	93986.6	5.0808	0.0025486	0.50848	0.00025507	5.5893	0.0028037	501.959	504.63	105.9	0.080345	107.73	107.71	107.79	1.8326	-0.21283	-3.11e-05	NaN	56.139	20	8	4	NaN	NaN	NaN
doa10Δ(H)/WT(L) Rep1	VALTGLTIAEYFR	13	0	Unmodified	_VALTGLTIAEYFR_					0	0	0	0	P00830	P00830	P00830	ATP2	ATP synthase subunit beta, mitochondrial	ISO-MSMS	-1	727.411	2	727.406	1452.8	NaN	NaN	NaN	-0.10076	-7.33e-05	NaN	NaN	NaN	NaN	94.404	0.66467	96.537	96.215	96.88	2.1332								0	0	0
doa10Δ(H)/WT(L) Rep1	VLDTGGPISVPVGR	14	0	Unmodified	_VLDTGGPISVPVGR_					0	0	0	0	P00830	P00830	P00830	ATP2	ATP synthase subunit beta, mitochondrial	ISO-MSMS	-1	683.891	2	683.888	1365.76	NaN	NaN	NaN	-0.080386	-5.5e-05	NaN	NaN	NaN	NaN	58.313	0.57944	60.347	60.159	60.738	2.0333								0	0	0
doa10Δ(H)/WT(L) Rep1	VVDLLAPYAR	10	0	Unmodified	_VVDLLAPYAR_					0	0	0	0	P00830	P00830	P00830	ATP2	ATP synthase subunit beta, mitochondrial	ISO-MSMS	-1	558.827	2	558.824	1115.63	NaN	NaN	NaN	0.59183	0.00033073	NaN	NaN	NaN	NaN	67.758	0.63258	69.891	69.593	70.226	2.1334								0	0	0
doa10Δ(H)/WT(L) Rep1	DAPTFQESALIADK	14	1	Unmodified	_DAPTFQESALIADK_					0	0	0	0	P38077	P38077	P38077	ATP3	ATP synthase subunit gamma, mitochondrial	MULTI-MATCH			2	753.378	1504.74	71536.1	5.6242	0.0042371	0.60893	0.00045876	6.2331	0.0046959	753.378	757.385	62.496	0.39802	64.63	64.35	64.748	2.1334	0.27531	0.00051324	NaN	48.527	117	38	5	NaN	NaN	NaN
doa10Δ(H)/WT(L) Rep1	GLCGSIHSQLAK	12	1	Unmodified	_GLCGSIHSQLAK_					0	0	0	0	P38077	P38077	P38077	ATP3	ATP synthase subunit gamma, mitochondrial	ISO-MSMS	0	424.226	3	424.224	1269.65	NaN	NaN	NaN	0.40003	0.0001697	NaN	NaN	NaN	NaN	30.651	0.62255	32.584	32.279	32.901	1.9329								0	0	0
doa10Δ(H)/WT(L) Rep1	TIEQSPSFGK	10	1	Unmodified	_TIEQSPSFGK_					0	0	0	0	P38077	P38077	P38077	ATP3	ATP synthase subunit gamma, mitochondrial	MULTI-MSMS		551.29	2	547.28	1092.55	82628.2	5.185	0.0028377	1.3788	0.00075459	6.5638	0.0035922	547.281	551.287	30.868	0.44843	32.801	32.548	32.996	1.9329					180	46	5	0	0	0
doa10Δ(H)/WT(L) Rep1	VLQQSISEIEQLLSK	15	1	Unmodified	_VLQQSISEIEQLLSK_					0	0	0	0	P05626	P05626	P05626	ATP4	ATP synthase subunit 4, mitochondrial	MULTI-MSMS		575.334	3	572.324	1713.95	78967.6	5.3423	0.0030576	0.66129	0.00037847	6.0036	0.003436	572.325	575.33	99.959	0.19532	101.99	101.86	102.06	2.0331					54	21	4	0	0	0
doa10Δ(H)/WT(L) Rep1	VLQQSISEIEQLLSK	15	1	Unmodified	_VLQQSISEIEQLLSK_					0	0	0	0	P05626	P05626	P05626	ATP4	ATP synthase subunit 4, mitochondrial	MULTI-MATCH			3	572.324	1713.95	77332.7	5.3266	0.0030485	0.64718	0.0003704	5.9737	0.0034189	572.659	574.996	100.08	0.088516	102.11	102.08	102.17	2.0331	-0.034157	0.00055773	NaN	90.853	23	9	4	NaN	NaN	NaN
doa10Δ(H)/WT(L) Rep1	VSDVLNASR	9	0	Unmodified	_VSDVLNASR_					0	0	0	0	P05626	P05626	P05626	ATP4	ATP synthase subunit 4, mitochondrial	ISO-MSMS	-1	480.761	2	480.759	959.504	NaN	NaN	NaN	-0.08239	-3.96e-05	NaN	NaN	NaN	NaN	26.863	0.39915	28.796	28.614	29.013	1.9329								0	0	0
doa10Δ(H)/WT(L) Rep1	LGHLLLNPALSLK	13	1	Unmodified	_LGHLLLNPALSLK_					0	0	0	0	P09457	P09457	P09457	ATP5	ATP synthase subunit 5, mitochondrial	MULTI-MATCH			3	463.626	1387.86	90914.3	5.4063	0.0025065	-0.17218	-7.98e-05	5.2341	0.0024267	463.626	466.297	67.71	0.95682	69.844	69.297	70.253	2.1334	0.6847	2.08e-05	NaN	80.318	253	99	5	NaN	NaN	NaN
doa10Δ(H)/WT(L) Rep1	NLDGYVVNLLK	11	1	Unmodified	_NLDGYVVNLLK_					0	0	0	0	P09457	P09457	P09457	ATP5	ATP synthase subunit 5, mitochondrial	MULTI-MSMS		624.356	2	624.353	1246.69	77111.3	5.5813	0.0034847	0.44933	0.00028054	6.0306	0.0037652	624.353	628.361	84.17	0.59843	86.403	86.12	86.719	2.2335					266	59	6	0	0	0
doa10Δ(H)/WT(L) Rep1	NSSIDAAFQSLQK	13	1	Unmodified	_NSSIDAAFQSLQK_					0	0	0	0	P09457	P09457	P09457	ATP5	ATP synthase subunit 5, mitochondrial	MULTI-MSMS		704.861	2	704.857	1407.7	70194.2	5.7004	0.004018	0.38506	0.00027141	6.0855	0.0042894	704.857	708.864	62.664	0.41866	64.797	64.622	65.041	2.1334					170	42	6	0	0	0
doa10Δ(H)/WT(L) Rep1	TVDLSISTK	9	1	Unmodified	_TVDLSISTK_					0	0	0	0	P09457	P09457	P09457	ATP5	ATP synthase subunit 5, mitochondrial	ISO-MSMS	0	482.274	2	482.271	962.528	NaN	NaN	NaN	0.30536	0.00014727	NaN	NaN	NaN	NaN	40.95	0.99141	42.983	42.644	43.635	2.0333								0	0	0
doa10Δ(H)/WT(L) Rep1	ETESLVSK	8	1	Unmodified	_ETESLVSK_					0	0	0	0	P30902	P30902	P30902	ATP7	ATP synthase subunit d, mitochondrial	MULTI-MSMS		450.745	2	446.735	891.455	90315.5	5.4684	0.0024429	-0.27908	-0.00012467	5.1893	0.0023182	446.735	450.742	18.227	0.59082	19.559	19.265	19.856	1.3316					223	63	7	0	0	0
doa10Δ(H)/WT(L) Rep1	ITGSTATQLSSFK	13	1	Unmodified	_ITGSTATQLSSFK_					0	0	0	0	P30902	P30902	P30902	ATP7	ATP synthase subunit d, mitochondrial	MULTI-MSMS		670.859	2	670.856	1339.7	74615.8	5.4808	0.0036768	0.26878	0.00018031	5.7495	0.0038571	670.856	674.864	43.916	0.58421	45.949	45.665	46.249	2.0333					269	59	6	0	0	0
doa10Δ(H)/WT(L) Rep1	HYQFNVVMTCSGCSGAVNK	19	1	Unmodified	_HYQFNVVMTCSGCSGAVNK_					0	0	0	0	P38636	P38636	P38636	ATX1	Metal homeostasis factor ATX1	MULTI-MATCH			3	720.32	2157.94	72463.6	5.8762	0.0042327	-0.13259	-9.55e-05	5.7436	0.0041372	720.32	722.992	50.76	0.6378	52.894	52.544	53.182	2.1335	0.026	5.03e-05	NaN	79.347	171	64	5	NaN	NaN	NaN
doa10Δ(H)/WT(L) Rep1	SSATSITSLGVKR	13	1	GlyGly (K)	_SSATSITSLGVK(gl)R_	SSATSITSLGVK(1)R		SSATSITSLGVK(48.53)R		0	1	0	1	P36107	P36107	P36107	AUR1	Inositol phosphorylceramide synthase catalytic subunit AUR1	ISO-MSMS	0	474.265	3	474.263	1419.77	NaN	NaN	NaN	-0.013628	-6.46e-06	NaN	NaN	NaN	NaN	34.402	0.27426	36.435	36.363	36.637	2.0331								0	0	0
doa10Δ(H)/WT(L) Rep1	SSATSITSLGVKR	13	1	GlyGly (K)	_SSATSITSLGVK(gl)R_	SSATSITSLGVK(1)R		SSATSITSLGVK(51.73)R		0	1	0	1	P36107	P36107	P36107	AUR1	Inositol phosphorylceramide synthase catalytic subunit AUR1	MULTI-SECPEP		474.256	3	474.263	1419.77	88299.5	5.1641	0.0024491	0.37209	0.00017647	5.5361	0.0026256	474.263	477.269	34.652	0.60217	36.685	36.445	37.048	2.0331					165	67	5	0	0	0
doa10Δ(H)/WT(L) Rep1	FTNNDMDSIVVKR	13	1	GlyGly (K)	_FTNNDMDSIVVK(gl)R_					0	1	0	1	P47082	P47082	P47082	AVT1	Vacuolar amino acid transporter 1	MULTI-MATCH			3	551.607	1651.8	78645.4	5.3037	0.0029255	-0.11885	-6.56e-05	5.1848	0.00286	551.607	554.278	45.844	0.49784	47.878	47.697	48.195	2.0333	0.00986	2.28e-05	NaN	57.106	253	53	7	NaN	NaN	NaN
doa10Δ(H)/WT(L) Rep1	LNYLNSSKR	9	1	GlyGly (K)	_LNYLNSSK(gl)R_					0	1	0	1	P50944	P50944	P50944	AVT4	Vacuolar amino acid transporter 4	MULTI-MATCH			3	403.551	1207.63	96162.4	5.4105	0.0021834	0.20268	8.18e-05	5.6132	0.0022652	403.551	406.222	22.605	0.49647	24.337	24.123	24.62	1.7324	-0.17929	-0.00044518	NaN	55.084	93	50	4	NaN	NaN	NaN
doa10Δ(H)/WT(L) Rep1	LDNHSATESDISSVDEKR	18	1	GlyGly (K)	_LDNHSATESDISSVDEK(gl)R_	LDNHSATESDISSVDEK(1)R		LDNHSATESDISSVDEK(47.94)R		0	1	0	1	P38928	P38928	P38928	AXL2	Axial budding pattern protein 2	MULTI-MSMS		532.006	4	529.999	2115.97	82202.5	5.2638	0.0027898	-0.25756	-0.00013651	5.0062	0.0026533	530.25	532.253	30.028	0.35905	31.961	31.811	32.17	1.9329					88	37	4	0	0	0
doa10Δ(H)/WT(L) Rep1	NGYLVYACAR	10	0	Unmodified	_NGYLVYACAR_					0	0	0	0	P40471	P40471	P40471	AYR1	NADPH-dependent 1-acyldihydroxyacetone phosphate reductase	ISO-MSMS	-1	593.79	2	593.787	1185.56	NaN	NaN	NaN	0.57138	0.00033928	NaN	NaN	NaN	NaN	47.513	0.64921	49.546	49.213	49.862	2.0333								0	0	0
doa10Δ(H)/WT(L) Rep1	FADSFKR	7	1	GlyGly (K)	_FADSFK(gl)R_	FADSFK(1)R		FADSFK(67.03)R		0	1	0	1	P38084	P38084	P38084	BAP2	Leu/Val/Ile amino-acid permease	MULTI-MSMS		496.759	2	492.749	983.482	86307.6	5.3579	0.0026401	0.72947	0.00035945	6.0874	0.0029996	492.748	496.756	25.116	0.43059	26.948	26.755	27.186	1.8327					164	41	5	0	0	0
doa10Δ(H)/WT(L) Rep1	LSSEDFGSSGKK	12	2	GlyGly (K)	_LSSEDFGSSGK(gl)K_	LSSEDFGSSGK(0.86)K(0.14)		LSSEDFGSSGK(7.87)K(-7.87)		0	1	0	1	P38084	P38084	P38084	BAP2	Leu/Val/Ile amino-acid permease	MULTI-MSMS		452.555	3	452.553	1354.64	88899.1	5.5301	0.0025027	0.41888	0.00018956	5.949	0.0026922	452.553	457.896	22.987	0.63121	24.719	24.407	25.038	1.7324					483	62	12	0	0	0
doa10Δ(H)/WT(L) Rep1	LSSEDFGSSGKK	12	2	GlyGly (K)	_LSSEDFGSSGK(gl)K_					0	1	0	1	P38084	P38084	P38084	BAP2	Leu/Val/Ile amino-acid permease	MULTI-MATCH			2	678.326	1354.64	72861.7	5.6871	0.0038577	0.40129	0.0002722	6.0884	0.0041299	678.326	686.34	22.974	0.4752	24.706	24.477	24.952	1.7324	-0.27097	0.000214	NaN	83.226	217	46	7	NaN	NaN	NaN
doa10Δ(H)/WT(L) Rep1	MLSSEDFGSSGKK	13	2	GlyGly (K)	_MLSSEDFGSSGK(gl)K_	MLSSEDFGSSGK(0.846)K(0.154)		MLSSEDFGSSGK(7.4)K(-7.4)		0	1	0	1	P38084	P38084	P38084	BAP2	Leu/Val/Ile amino-acid permease	MULTI-MSMS		496.236	3	496.233	1485.68	82840.9	5.1007	0.0025311	-0.079345	-3.94e-05	5.0213	0.0024918	496.233	501.576	31.09	0.64139	33.023	32.756	33.397	1.9329					472	65	10	0	0	0
doa10Δ(H)/WT(L) Rep1	MLSSEDFGSSGKK	13	2	GlyGly (K)	_MLSSEDFGSSGK(gl)K_	MLSSEDFGSSGK(0.5)K(0.5)		MLSSEDFGSSGK(0)K(0)		0	1	0	1	P38084	P38084	P38084	BAP2	Leu/Val/Ile amino-acid permease	MULTI-MSMS		743.853	2	743.846	1485.68	69491.1	5.3709	0.0039951	0.32073	0.00023857	5.6916	0.0042337	743.846	751.86	31.111	0.5062	33.044	32.814	33.32	1.9329					156	51	5	0	0	0
doa10Δ(H)/WT(L) Rep1	SFSAGNNFQSSSSEKTYSK	19	2	GlyGly (K)	_SFSAGNNFQSSSSEK(gl)TYSK_	SFSAGNNFQSSSSEK(0.961)TYSK(0.039)		SFSAGNNFQSSSSEK(13.89)TYSK(-13.89)		0	1	0	1	P38084	P38084	P38084	BAP2	Leu/Val/Ile amino-acid permease	MULTI-MSMS		729.676	3	723.994	2168.96	70386.4	6.0356	0.0043698	-0.18555	-0.00013434	5.8501	0.0042354	724.329	729.337	32.983	1.0369	35.016	34.634	35.671	2.0331					762	113	12	0	0	0
doa10Δ(H)/WT(L) Rep1	TKQINENTSDLEDGVESITSDSK	23	2	GlyGly (K)	_TK(gl)QINENTSDLEDGVESITSDSK_					0	1	0	1	P38084	P38084	P38084	BAP2	Leu/Val/Ile amino-acid permease	MULTI-MATCH			3	875.411	2623.21	65428.2	5.7913	0.0050698	-0.085878	-7.52e-05	5.7054	0.0049946	875.745	880.753	58.519	0.36865	60.553	60.289	60.658	2.0333	-0.43423	-0.00089017	NaN	62.781	155	39	6	NaN	NaN	NaN
doa10Δ(H)/WT(L) Rep1	LEEDNDLEDGTKSMK	15	2	GlyGly (K)	_LEEDNDLEDGTK(gl)SMK_	LEEDNDLEDGTK(0.99)SMK(0.01)		LEEDNDLEDGTK(20.17)SMK(-20.17)		0	1	0	1	P41815	P41815	P41815	BAP3	Valine amino-acid permease	MULTI-MSMS		618.955	3	613.276	1836.8	75486.1	4.8976	0.0030036	0.88357	0.00054187	5.7811	0.0035454	613.277	618.619	33.987	0.34063	36.02	35.834	36.174	2.0331					252	35	9	0	0	0
doa10Δ(H)/WT(L) Rep1	SDPIVTSSKMEK	12	2	Acetyl (Protein N-term),GlyGly (K)	_(ac)SDPIVTSSK(gl)MEK_	SDPIVTSSK(0.905)MEK(0.095)		SDPIVTSSK(9.79)MEK(-9.79)		1	1	0	1	P41815	P41815	P41815	BAP3	Valine amino-acid permease	MULTI-MSMS		747.383	2	739.364	1476.71	69901.7	5.7712	0.004267	-0.10365	-7.66e-05	5.6675	0.0041904	739.364	747.378	39.081	0.59766	41.114	40.885	41.482	2.0333					366	62	7	0	0	0
doa10Δ(H)/WT(L) Rep1	SNISTKDIR	9	1	Acetyl (Protein N-term),GlyGly (K)	_(ac)SNISTK(gl)DIR_	SNISTK(1)DIR		SNISTK(59.07)DIR		1	1	0	1	P22035	P22035	P22035	BAS1	Myb-like DNA-binding protein BAS1	MULTI-MSMS		599.322	2	595.312	1188.61	76894	5.1669	0.0030759	-0.16767	-9.98e-05	4.9993	0.0029761	595.312	599.319	30.925	0.33824	32.858	32.631	32.969	1.9329					99	34	5	0	0	0
doa10Δ(H)/WT(L) Rep1	GLGVGTPSEALLYVITSPVGPYYK	24	1	Unmodified	_GLGVGTPSEALLYVITSPVGPYYK_					0	0	0	0	P38891	P38891	P38891	BAT1	Branched-chain-amino-acid aminotransferase, mitochondrial	MULTI-MATCH			3	827.781	2480.32	69759.3	4.1215	0.0034117	0.26707	0.00022107	4.3886	0.0036328	828.115	830.786	111.8	0.24557	112.33	112.15	112.4	0.52949	0.034319	9.17e-05	NaN	162.44	62	18	6	NaN	NaN	NaN
doa10Δ(H)/WT(L) Rep1	HLVPQGNGYSLYIRPTMIGTSK	22	1	Unmodified	_HLVPQGNGYSLYIRPTMIGTSK_					0	0	0	1	P38891	P38891	P38891	BAT1	Branched-chain-amino-acid aminotransferase, mitochondrial	MULTI-SECPEP		609.328	4	608.824	2431.27	77119.9	5.5407	0.0033733	0.44673	0.00027198	5.9874	0.0036453	609.076	610.828	61.985	0.4419	64.118	63.779	64.221	2.1335					82	46	5	0	0	0
doa10Δ(H)/WT(L) Rep1	QVAQWIADIQYGR	13	0	Unmodified	_QVAQWIADIQYGR_					0	0	0	0	P38891	P38891	P38891	BAT1	Branched-chain-amino-acid aminotransferase, mitochondrial	ISO-MSMS	-1	774.407	2	774.402	1546.79	NaN	NaN	NaN	-0.097719	-7.57e-05	NaN	NaN	NaN	NaN	78.755	0.69949	80.988	80.663	81.362	2.2335								0	0	0
doa10Δ(H)/WT(L) Rep1	TPQNTITMFRPDK	13	1	Unmodified	_TPQNTITMFRPDK_					0	0	0	1	P38891	P38891	P38891	BAT1	Branched-chain-amino-acid aminotransferase, mitochondrial	MULTI-MSMS		519.606	3	516.933	1547.78	82485.5	5.3831	0.0027827	-0.36412	-0.00018822	5.0189	0.0025945	516.933	519.604	47.309	0.59502	49.342	48.951	49.546	2.0333					365	62	8	0	0	0
doa10Δ(H)/WT(L) Rep1	YYTITEVATR	10	0	Unmodified	_YYTITEVATR_					0	0	0	0	P38891	P38891	P38891	BAT1	Branched-chain-amino-acid aminotransferase, mitochondrial	ISO-MSMS	-1	608.817	2	608.814	1215.61	NaN	NaN	NaN	-0.28703	-0.00017475	NaN	NaN	NaN	NaN	50.507	0.60266	52.641	52.395	52.997	2.1335								0	0	0
doa10Δ(H)/WT(L) Rep1	ALLYVICCPVGPYYK	15	1	Unmodified	_ALLYVICCPVGPYYK_					0	0	0	0	P47176	P47176	P47176	BAT2	Branched-chain-amino-acid aminotransferase, cytosolic	MULTI-MSMS		908.966	2	908.462	1814.91	63250.2	5.4477	0.004949	0.28131	0.00025556	5.729	0.0052046	908.964	912.47	83.243	0.74416	85.477	85.172	85.916	2.2335					361	75	8	0	0	0
doa10Δ(H)/WT(L) Rep1	SPFVNEDPHSNVFK	14	1	Unmodified	_SPFVNEDPHSNVFK_					0	0	0	0	P07278	P07278	P07278	BCY1	cAMP-dependent protein kinase regulatory subunit	MULTI-MATCH			3	539.595	1615.76	84696.2	5.768	0.0031124	-0.51116	-0.00027582	5.2568	0.0028365	539.595	542.266	47.297	0.3079	49.33	49.183	49.491	2.0333	-0.037898	-0.00064661	NaN	26.942	96	32	5	NaN	NaN	NaN
doa10Δ(H)/WT(L) Rep1	LSVQHEPPIIDQK	13	1	Unmodified	_LSVQHEPPIIDQK_					0	0	0	0	P39960	P39960	P39960	BEM2	GTPase-activating protein BEM2/IPL2	MULTI-MSMS		757.427	2	752.412	1502.81	69273.5	5.6328	0.0042382	0.35385	0.00026624	5.9867	0.0045045	752.412	756.419	61.682	0.99283	63.815	63.434	64.427	2.1335					468	103	7	0	0	0
doa10Δ(H)/WT(L) Rep1	VILQILNYIR	10	0	Unmodified	_VILQILNYIR_					0	0	0	0	P39960	P39960	P39960	BEM2	GTPase-activating protein BEM2/IPL2	ISO-MSMS	-1	622.893	2	622.89	1243.77	NaN	NaN	NaN	0.13114	8.17e-05	NaN	NaN	NaN	NaN	95.803	0.41264	97.836	97.461	97.874	2.0331								0	0	0
doa10Δ(H)/WT(L) Rep1	DVSNQFEENQQK	12	1	Unmodified	_DVSNQFEENQQK_					0	0	0	0	P38934	P38934	P38934	BFR1	Nuclear segregation protein BFR1	MULTI-MSMS		733.335	2	733.331	1464.65	71185.1	5.6083	0.0041127	0.44352	0.00032525	6.0518	0.004438	733.332	737.339	30.403	0.39304	32.336	32.199	32.592	1.9329					167	39	6	0	0	0
doa10Δ(H)/WT(L) Rep1	FSSTAEAK	8	1	Unmodified	_FSSTAEAK_					0	0	0	0	P38934	P38934	P38934	BFR1	Nuclear segregation protein BFR1	MULTI-MATCH			2	420.709	839.402	93783	5.1519	0.0021674	-0.20887	-8.79e-05	4.943	0.0020796	420.708	424.715	11.194	0.34785	12.124	11.916	12.264	0.93061	-0.057153	-0.00038697	NaN	82.75	117	33	6	NaN	NaN	NaN
doa10Δ(H)/WT(L) Rep1	KNILPDLSSNALETKPAR	18	2	Unmodified	_KNILPDLSSNALETKPAR_					0	0	0	2	P38934	P38934	P38934	BFR1	Nuclear segregation protein BFR1	MULTI-MSMS		496.539	4	492.528	1966.08	85991.9	5.503	0.0027104	0.14986	7.38e-05	5.6528	0.0027842	492.779	496.786	54.512	0.36532	56.545	56.398	56.764	2.0333					81	38	5	0	0	0
doa10Δ(H)/WT(L) Rep1	KNILPDLSSNALETKPAR	18	2	Unmodified	_KNILPDLSSNALETKPAR_					0	0	0	2	P38934	P38934	P38934	BFR1	Nuclear segregation protein BFR1	MULTI-MSMS		496.789	4	492.528	1966.08	86754.8	5.5783	0.0027475	0.048477	2.39e-05	5.6268	0.0027714	492.779	496.536	54.799	0.32697	56.833	56.687	57.013	2.0333					109	34	6	0	0	0
doa10Δ(H)/WT(L) Rep1	LNLDYSNKEQQVK	13	2	Unmodified	_LNLDYSNKEQQVK_					0	0	0	1	P38934	P38934	P38934	BFR1	Nuclear segregation protein BFR1	MSMS	1	532.287	3	526.942	1577.8	NaN	NaN	NaN	NaN	NaN	NaN	NaN	NaN	NaN	34.995	1	37.028	36.528	37.528	2.0331								0	0	0
doa10Δ(H)/WT(L) Rep1	SNIHDSIK	8	1	Unmodified	_SNIHDSIK_					0	0	0	0	P38934	P38934	P38934	BFR1	Nuclear segregation protein BFR1	MSMS	0	457.246	2	457.241	912.466	NaN	NaN	NaN	NaN	NaN	NaN	NaN	NaN	NaN	11.674	1	12.704	12.204	13.204	1.0309								0	0	0
doa10Δ(H)/WT(L) Rep1	TQGVYDKR	8	1	Unmodified	_TQGVYDKR_					0	0	0	1	P38934	P38934	P38934	BFR1	Nuclear segregation protein BFR1	MULTI-MATCH			2	483.754	965.493	87163.3	5.2316	0.0025308	-0.79895	-0.00038649	4.4326	0.0021443	483.754	487.76	9.7642	0.34419	10.595	10.474	10.818	0.83037	0.0076966	-0.00067926	NaN	63.184	130	36	5	NaN	NaN	NaN
doa10Δ(H)/WT(L) Rep1	VSSASGNAALSSNK	14	1	Unmodified	_VSSASGNAALSSNK_					0	0	0	0	Q06631	Q06631	Q06631	BFR2	Protein BFR2	MULTI-MSMS		646.829	2	646.826	1291.64	75498.1	5.6126	0.0036304	0.12972	8.39e-05	5.7424	0.0037143	646.826	650.833	15.578	0.20193	16.809	16.674	16.876	1.2313					82	21	5	0	0	0
doa10Δ(H)/WT(L) Rep1	STSDYETELQALK	13	1	Unmodified	_STSDYETELQALK_					0	0	0	0	P15703	P15703	P15703	BGL2	Glucan 1,3-beta-glucosidase	MULTI-MATCH			2	742.859	1483.7	71079.2	5.9666	0.0044323	-0.0038082	-2.83e-06	5.9628	0.0044295	743.361	746.866	61.234	0.48704	63.367	63.127	63.614	2.1335	-0.52926	-0.00050618	NaN	66.023	190	50	6	NaN	NaN	NaN
doa10Δ(H)/WT(L) Rep1	SVVADISDSDGK	12	1	Unmodified	_SVVADISDSDGK_					0	0	0	0	P15703	P15703	P15703	BGL2	Glucan 1,3-beta-glucosidase	MULTI-MSMS		596.791	2	596.788	1191.56	75584.8	5.5178	0.0032929	-0.14944	-8.92e-05	5.3683	0.0032038	596.788	600.795	35.189	0.55637	37.223	37.004	37.56	2.0331					243	59	7	0	0	0
doa10Δ(H)/WT(L) Rep1	IFNYFASLLQR	11	0	Unmodified	_IFNYFASLLQR_					0	0	0	0	P43583	P43583	P43583	BLM10	Proteasome activator BLM10	ISO-MSMS	-1	686.378	2	686.375	1370.73	NaN	NaN	NaN	0.16378	0.00011242	NaN	NaN	NaN	NaN	97.28	0.76419	99.414	99.094	99.858	2.1334								0	0	0
doa10Δ(H)/WT(L) Rep1	ATNASLEAYK	10	1	Unmodified	_ATNASLEAYK_					0	0	0	0	P29311	P29311	P29311	BMH1	Protein BMH1	MULTI-MSMS		534.276	2	534.272	1066.53	81236.6	5.5143	0.0029461	-0.11952	-6.39e-05	5.3948	0.0028823	534.272	538.279	27.151	0.47651	29.084	28.868	29.345	1.9329					253	48	8	0	0	0
doa10Δ(H)/WT(L) Rep1	TVASSGQELSVEER	14	0	Unmodified	_TVASSGQELSVEER_					0	0	0	0	P29311	P29311	P29311	BMH1	Protein BMH1	ISO-MSMS	-1	746.372	2	746.368	1490.72	NaN	NaN	NaN	0.91757	0.00068484	NaN	NaN	NaN	NaN	33.825	0.56692	35.858	35.542	36.109	2.0331								0	0	0
doa10Δ(H)/WT(L) Rep1	ATNSSLEAYK	10	1	Unmodified	_ATNSSLEAYK_					0	0	0	0	P34730	P34730	P34730	BMH2	Protein BMH2	MULTI-MSMS		542.272	2	542.269	1082.52	81288.1	5.5356	0.0030018	0.15312	8.3e-05	5.6887	0.0030848	542.269	546.277	24.876	0.40004	26.709	26.524	26.924	1.8327					150	39	6	0	0	0
doa10Δ(H)/WT(L) Rep1	AVASSGQELSVEER	14	0	Unmodified	_AVASSGQELSVEER_					0	0	0	0	P34730	P34730	P34730	BMH2	Protein BMH2	ISO-MSMS	-1	731.368	2	731.363	1460.71	NaN	NaN	NaN	-0.17236	-0.00012606	NaN	NaN	NaN	NaN	32.827	0.77489	34.861	34.673	35.448	2.0331								0	0	0
doa10Δ(H)/WT(L) Rep1	SEHQVELIR	9	0	Unmodified	_SEHQVELIR_					0	0	0	0	P34730	P34730	P34730	BMH2	Protein BMH2	ISO-MSMS	-1	555.802	2	555.799	1109.58	NaN	NaN	NaN	0.032805	1.82e-05	NaN	NaN	NaN	NaN	26.071	0.3975	28.004	27.891	28.288	1.9329								0	0	0
doa10Δ(H)/WT(L) Rep1	DSTLIMQLLR	10	0	Unmodified	_DSTLIMQLLR_					0	0	0	0	P34730;P29311	P34730;P29311	P34730	BMH2;BMH1	Protein BMH2;Protein BMH1	ISO-MSMS	-1	595.337	2	595.334	1188.65	NaN	NaN	NaN	-0.21636	-0.0001288	NaN	NaN	NaN	NaN	95.459	0.5481	97.493	97.309	97.857	2.0331								0	0	0
doa10Δ(H)/WT(L) Rep1	EDSVYLAK	8	1	Unmodified	_EDSVYLAK_					0	0	0	0	P34730;P29311	P34730;P29311	P34730	BMH2;BMH1	Protein BMH2;Protein BMH1	MULTI-MATCH			2	462.737	923.46	87528.4	5.4416	0.002518	-0.14194	-6.57e-05	5.2997	0.0024524	462.737	466.744	28.997	0.57004	30.929	30.671	31.241	1.9329	0.085771	3.45e-05	NaN	53.775	295	59	8	NaN	NaN	NaN
doa10Δ(H)/WT(L) Rep1	ISDDILSVLDSHLIPSATTGESK	23	1	Unmodified	_ISDDILSVLDSHLIPSATTGESK_					0	0	0	0	P34730;P29311	P34730;P29311	P34730	BMH2;BMH1	Protein BMH2;Protein BMH1	MULTI-MSMS		802.757	3	800.083	2397.23	67769.5	5.2649	0.0042123	0.27769	0.00022218	5.5425	0.0044345	800.418	803.089	98.01	0.1993	100.14	100	100.2	2.1334					59	20	5	0	0	0
doa10Δ(H)/WT(L) Rep1	ISDDILSVLDSHLIPSATTGESK	23	1	Unmodified	_ISDDILSVLDSHLIPSATTGESK_					0	0	0	0	P34730;P29311	P34730;P29311	P34730	BMH2;BMH1	Protein BMH2;Protein BMH1	MULTI-MSMS		802.759	3	800.083	2397.23	67722.2	5.3064	0.0042456	-0.076875	-6.15e-05	5.2296	0.0041841	800.417	803.089	98.286	0.72728	100.42	100.12	100.85	2.1334					417	76	10	0	0	0
doa10Δ(H)/WT(L) Rep1	IVSSIEQK	8	1	Unmodified	_IVSSIEQK_					0	0	0	0	P34730;P29311	P34730;P29311	P34730	BMH2;BMH1	Protein BMH2;Protein BMH1	MULTI-MSMS		452.263	2	452.261	902.507	90366.2	5.3583	0.0024234	0.36312	0.00016423	5.7214	0.0025876	452.261	456.268	19.61	0.66131	21.042	20.749	21.411	1.4318					329	75	8	0	0	0
doa10Δ(H)/WT(L) Rep1	IVSSIEQKEESKEK	14	3	Unmodified	_IVSSIEQKEESKEK_					0	0	0	2	P34730;P29311	P34730;P29311	P34730	BMH2;BMH1	Protein BMH2;Protein BMH1	MULTI-MSMS		545.295	3	545.293	1632.86	80854.8	5.4415	0.0029672	0.09515	5.19e-05	5.5366	0.0030191	545.293	553.307	15.623	0.34531	16.854	16.754	17.099	1.2313					126	35	6	0	0	0
doa10Δ(H)/WT(L) Rep1	IVSSIEQKEESKEK	14	3	Unmodified	_IVSSIEQKEESKEK_					0	0	0	2	P34730;P29311	P34730;P29311	P34730	BMH2;BMH1	Protein BMH2;Protein BMH1	ISO-MSMS	0	409.224	4	409.222	1632.86	NaN	NaN	NaN	-0.010857	-4.44e-06	NaN	NaN	NaN	NaN	15.626	0.46117	16.857	16.656	17.118	1.2313								0	0	0
doa10Δ(H)/WT(L) Rep1	NLLSVAYK	8	1	Unmodified	_NLLSVAYK_					0	0	0	0	P34730;P29311	P34730;P29311	P34730	BMH2;BMH1	Protein BMH2;Protein BMH1	MULTI-MSMS		454.268	2	454.266	906.517	90911.5	5.4571	0.002479	-0.18168	-8.25e-05	5.2754	0.0023964	454.266	458.273	51.242	0.96503	53.376	52.862	53.827	2.1335					417	102	8	0	0	0
doa10Δ(H)/WT(L) Rep1	NLLSVAYKNVIGAR	14	1	GlyGly (K)	_NLLSVAYK(gl)NVIGAR_	NLLSVAYK(1)NVIGAR		NLLSVAYK(78.96)NVIGAR		0	1	0	1	P34730;P29311	P34730;P29311	P34730	BMH2;BMH1	Protein BMH2;Protein BMH1	MULTI-MSMS		547.32	3	544.646	1630.92	81354.4	5.5996	0.0030498	0.13122	7.15e-05	5.7308	0.0031212	544.646	547.317	76.24	0.54317	78.474	78.351	78.895	2.2335					190	58	6	0	0	0
doa10Δ(H)/WT(L) Rep1	TASEIATTELPPTHPIR	17	0	Unmodified	_TASEIATTELPPTHPIR_					0	0	0	0	P34730;P29311	P34730;P29311	P34730	BMH2;BMH1	Protein BMH2;Protein BMH1	ISO-MSMS	-1	611.998	3	611.995	1832.96	NaN	NaN	NaN	0.030485	1.87e-05	NaN	NaN	NaN	NaN	47.319	0.45446	49.352	49.06	49.515	2.0333								0	0	0
doa10Δ(H)/WT(L) Rep1	YEEMVENMK	9	1	Unmodified	_YEEMVENMK_					0	0	0	0	P34730;P29311	P34730;P29311	P34730	BMH2;BMH1	Protein BMH2;Protein BMH1	MULTI-MSMS		591.265	2	586.752	1171.49	79385.5	5.4685	0.0032087	0.48176	0.00028267	5.9503	0.0034913	586.752	590.759	37.154	0.39473	39.087	38.947	39.342	1.933					122	47	4	0	0	0
doa10Δ(H)/WT(L) Rep1	YLAEFSSGDAR	11	0	Unmodified	_YLAEFSSGDAR_					0	0	0	0	P34730;P29311	P34730;P29311	P34730	BMH2;BMH1	Protein BMH2;Protein BMH1	ISO-MSMS	-1	608.289	2	608.286	1214.56	NaN	NaN	NaN	0.12912	7.85e-05	NaN	NaN	NaN	NaN	43.665	0.75755	45.698	45.349	46.107	2.0333								0	0	0
doa10Δ(H)/WT(L) Rep1	LFYLSGVINGR	11	0	Unmodified	_LFYLSGVINGR_					0	0	0	0	Q08965	Q08965	Q08965	BMS1	Ribosome biogenesis protein BMS1	ISO-MSMS	-1	619.852	2	619.848	1237.68	NaN	NaN	NaN	0.23129	0.00014337	NaN	NaN	NaN	NaN	77.031	0.90024	79.264	78.904	79.804	2.2335								0	0	0
doa10Δ(H)/WT(L) Rep1	GGFTVMIVGGPNER	14	0	Unmodified	_GGFTVMIVGGPNER_					0	0	0	0	P47096	P47096	P47096	BNA1	3-hydroxyanthranilate 3,4-dioxygenase	ISO-MSMS	-1	717.368	2	717.364	1432.71	NaN	NaN	NaN	-0.57967	-0.00041584	NaN	NaN	NaN	NaN	67.56	0.32576	69.693	69.45	69.776	2.1334								0	0	0
doa10Δ(H)/WT(L) Rep1	GGFTVMIVGGPNER	14	0	Unmodified	_GGFTVMIVGGPNER_					0	0	0	0	P47096	P47096	P47096	BNA1	3-hydroxyanthranilate 3,4-dioxygenase	ISO-MSMS	-1	717.869	2	717.364	1432.71	NaN	NaN	NaN	-0.63765	-0.00045743	NaN	NaN	NaN	NaN	67.754	0.82153	69.887	69.756	70.578	2.1334								0	0	0
doa10Δ(H)/WT(L) Rep1	MGLDQDKIKK	10	3	Acetyl (Protein N-term),Oxidation (M),GlyGly (K)	_(ac)M(ox)GLDQDKIKK(gl)_	MGLDQDK(0.005)IK(0.059)K(0.936)	M(1)GLDQDKIKK	MGLDQDK(-22.81)IK(-12.02)K(12.02)	M(43.65)GLDQDKIKK	1	1	1	2	P53890	P53890	P53890	BNI5	Bud neck protein 5	MSMS	0	674.351	2	674.35	1346.69	NaN	NaN	NaN	NaN	NaN	NaN	NaN	NaN	NaN	74.187	1	76.42	75.92	76.92	2.2335								0	0	0
doa10Δ(H)/WT(L) Rep1	MSLEGNTLGKGAK	13	2	Acetyl (Protein N-term),Oxidation (M),2 GlyGly (K)	_(ac)M(ox)SLEGNTLGK(gl)GAK(gl)_					1	2	1	1	P38041	P38041	P38041	BOI1	Protein BOB1	MULTI-MATCH			3	531.263	1590.77	81385.6	5.1255	0.002723	1.789	0.00095043	6.9145	0.0036734	531.264	536.607	38.557	0.35809	40.59	40.408	40.766	2.0333	-0.058272	0.00039336	NaN	42.083	106	35	4	NaN	NaN	NaN
doa10Δ(H)/WT(L) Rep1	SFPLYIAVNQYSK	13	1	Unmodified	_SFPLYIAVNQYSK_					0	0	0	0	P38041	P38041	P38041	BOI1	Protein BOB1	MULTI-MATCH			2	765.404	1528.79	67750.8	5.783	0.0044263	0.82185	0.00062905	6.6048	0.0050554	765.405	769.411	78.324	0.59649	80.558	80.341	80.938	2.2335	0.13352	0.00069135	NaN	57.267	157	61	5	NaN	NaN	NaN
doa10Δ(H)/WT(L) Rep1	STLSLALFR	9	0	Unmodified	_STLSLALFR_					0	0	0	0	P14772	P14772	P14772	BPT1	Bile pigment transporter 1	ISO-MSMS	-1	504.301	2	504.298	1006.58	NaN	NaN	NaN	0.1921	9.69e-05	NaN	NaN	NaN	NaN	76.17	0.84023	78.404	78.054	78.895	2.2335								0	0	0
doa10Δ(H)/WT(L) Rep1	KLANIMALIVTLAR	14	1	Unmodified	_KLANIMALIVTLAR_					0	0	0	1	Q07457	Q07457	Q07457	BRE1	E3 ubiquitin-protein ligase BRE1	MULTI-MATCH			3	509.653	1525.94	89271.1	4.7215	0.0024063	-0.27121	-0.00013822	4.4503	0.0022681	509.988	512.324	109.69	0.23108	111.22	111.17	111.4	1.5319	0.21209	-0.0012063	NaN	55.98	48	23	6	NaN	NaN	NaN
doa10Δ(H)/WT(L) Rep1	KLANIMALIVTLAR	14	1	Unmodified	_KLANIMALIVTLAR_					0	0	0	1	Q07457	Q07457	Q07457	BRE1	E3 ubiquitin-protein ligase BRE1	MULTI-MATCH			3	509.653	1525.94	85984.7	4.7434	0.0024175	0.5655	0.00028821	5.3089	0.0027057	509.654	512.325	109.4	0.51678	111.03	110.71	111.23	1.6322	0.010567	5.76e-05	NaN	78.814	131	53	4	NaN	NaN	NaN
doa10Δ(H)/WT(L) Rep1	QENINSSSNLFPEGKVPQEK	20	2	GlyGly (K)	_QENINSSSNLFPEGK(gl)VPQEK_					0	1	0	1	P25558	P25558	P25558	BUD3	Bud site selection protein 3	MULTI-MATCH			3	787.056	2358.15	68979.3	5.7701	0.0045414	-0.23592	-0.00018568	5.5342	0.0043557	787.391	792.398	50.383	0.30178	52.516	52.395	52.696	2.1335	-0.0050516	-0.00049784	NaN	51.566	97	31	5	NaN	NaN	NaN
doa10Δ(H)/WT(L) Rep1	VPQEKGVSNENTNISLK	17	2	GlyGly (K)	_VPQEK(gl)GVSNENTNISLK_					0	1	0	1	P25558	P25558	P25558	BUD3	Bud site selection protein 3	MULTI-MATCH			3	657.676	1970.01	75248.1	5.6818	0.0037368	0.59549	0.00039164	6.2773	0.0041284	657.676	663.019	33.69	0.50842	35.723	35.476	35.984	2.0331	0.26883	0.00041692	NaN	50.178	184	50	6	NaN	NaN	NaN
doa10Δ(H)/WT(L) Rep1	LTRNVSRAEIMLK	13	1	Oxidation (M),GlyGly (K)	_LTRNVSRAEIM(ox)LK(gl)_					0	1	1	2	Q08754	Q08754	Q08754	BUD7	Bud site selection protein 7	MULTI-MATCH			2	830.962	1659.91	66196.1	5.6297	0.0046781	1.3163	0.0010938	6.946	0.0057719	830.963	835.472	89.915	0.23532	92.048	91.856	92.092	2.1332	1.3519	0.00021481	NaN	45.115	72	24	4	NaN	NaN	NaN
doa10Δ(H)/WT(L) Rep1	NNYLVNYNDLKLGHDLDNGR	20	1	GlyGly (K)	_NNYLVNYNDLK(gl)LGHDLDNGR_	NNYLVNYNDLK(1)LGHDLDNGR		NNYLVNYNDLK(62.94)LGHDLDNGR		0	1	0	1	P48524	P48524	P48524	BUL1	Ubiquitin ligase-binding protein BUL1	MULTI-SECPEP		615.794	4	616.052	2460.18	76205.6	5.2371	0.0032263	0.21262	0.00013099	5.4497	0.0033573	616.052	618.306	63.817	0.53672	65.951	65.692	66.228	2.1334					238	58	7	0	0	0
doa10Δ(H)/WT(L) Rep1	KLDQLHINNR	10	1	GlyGly (K)	_K(gl)LDQLHINNR_	K(1)LDQLHINNR		K(100.69)LDQLHINNR		0	1	0	1	Q03758	Q03758	Q03758	BUL2	Ubiquitin ligase-binding protein BUL2	MULTI-MSMS		458.259	3	455.585	1363.73	88312.2	5.3989	0.0024596	0.36457	0.00016609	5.7635	0.0026257	455.585	458.256	24.939	0.51915	26.772	26.352	26.871	1.8327					354	49	10	0	0	0
doa10Δ(H)/WT(L) Rep1	KLDQLHINNR	10	1	GlyGly (K)	_K(gl)LDQLHINNR_	K(1)LDQLHINNR		K(95.52)LDQLHINNR		0	1	0	1	Q03758	Q03758	Q03758	BUL2	Ubiquitin ligase-binding protein BUL2	MULTI-MSMS		455.586	3	455.585	1363.73	88892.5	5.3729	0.0024478	-0.10122	-4.61e-05	5.2717	0.0024017	455.585	458.256	25.115	0.7535	26.948	26.851	27.604	1.8327					545	73	11	0	0	0
doa10Δ(H)/WT(L) Rep1	AIYPYLLVNIGSGVSILK	18	1	Unmodified	_AIYPYLLVNIGSGVSILK_					0	0	0	0	Q04430	Q04430	Q04430	CAB1	Pantothenate kinase CAB1	MULTI-MATCH			2	960.564	1919.11	63455	5.0577	0.0048583	-0.11649	-0.00011189	4.9412	0.0047464	960.564	964.571	108.02	0.32819	109.66	109.6	109.93	1.6322	0.3715	-0.00011935	NaN	66.977	137	34	7	NaN	NaN	NaN
doa10Δ(H)/WT(L) Rep1	AIYPYLLVNIGSGVSILK	18	1	Unmodified	_AIYPYLLVNIGSGVSILK_					0	0	0	0	Q04430	Q04430	Q04430	CAB1	Pantothenate kinase CAB1	MULTI-MATCH			3	640.712	1919.11	76525.5	5.3404	0.0034216	0.082668	5.3e-05	5.423	0.0034746	641.046	643.718	107.74	0.23531	109.37	109.17	109.4	1.6322	0.28112	-0.00054431	NaN	64.275	110	25	8	NaN	NaN	NaN
doa10Δ(H)/WT(L) Rep1	SLLFAISNNIGQIAYLQAK	19	1	Unmodified	_SLLFAISNNIGQIAYLQAK_					0	0	0	0	Q04430	Q04430	Q04430	CAB1	Pantothenate kinase CAB1	MULTI-MATCH			3	688.721	2063.14	76775.5	5.3676	0.0036968	-0.70903	-0.00048833	4.6586	0.0032085	688.72	691.391	104.15	0.053535	106.08	106.05	106.1	1.9329	0.049692	-0.001663	NaN	26.412	15	5	5	NaN	NaN	NaN
doa10Δ(H)/WT(L) Rep1	SSAIASSFGKVFQNR	15	1	GlyGly (K)	_SSAIASSFGK(gl)VFQNR_	SSAIASSFGK(1)VFQNR		SSAIASSFGK(68.04)VFQNR		0	1	0	1	Q04430	Q04430	Q04430	CAB1	Pantothenate kinase CAB1	MSMS	0	571.632	3	571.629	1711.86	NaN	NaN	NaN	NaN	NaN	NaN	NaN	NaN	NaN	60.606	1	62.739	62.239	63.239	2.1335								0	0	0
doa10Δ(H)/WT(L) Rep1	GASSAEQFLANGYSVIFLHR	20	0	Unmodified	_GASSAEQFLANGYSVIFLHR_					0	0	0	0	P40506	P40506	P40506	CAB2	Phosphopantothenate--cysteine ligase CAB2	ISO-MSMS	-1	723.374	3	723.036	2166.09	NaN	NaN	NaN	-0.33355	-0.00024117	NaN	NaN	NaN	NaN	98.472	0.33147	100.61	100.33	100.66	2.1334								0	0	0
doa10Δ(H)/WT(L) Rep1	LLLLPFTTVNQYLWSLK	17	1	Unmodified	_LLLLPFTTVNQYLWSLK_					0	0	0	0	P40506	P40506	P40506	CAB2	Phosphopantothenate--cysteine ligase CAB2	MSMS	1	1028.88	2	1025.09	2048.17	NaN	NaN	NaN	NaN	NaN	NaN	NaN	NaN	NaN	112.13	1	112.56	112.06	113.06	0.42924								0	0	0
doa10Δ(H)/WT(L) Rep1	VQLAMGLLKPWR	12	1	Unmodified	_VQLAMGLLKPWR_					0	0	0	1	P43569	P43569	P43569	CAF16	CCR4-associated factor 16	MULTI-MSMS		474.288	3	471.28	1410.82	88176.4	5.2737	0.0024854	-1.0777	-0.00050792	4.196	0.0019775	471.613	473.951	76.798	0.71544	79.032	78.65	79.366	2.2335					278	77	6	0	0	0
doa10Δ(H)/WT(L) Rep1	FINCILGMVSFSPNER	16	0	Unmodified	_FINCILGMVSFSPNER_					0	0	0	0	P43568	P43568	P43568	CAK1	Serine/threonine-protein kinase CAK1	ISO-MSMS	-1	628.981	3	628.643	1882.91	NaN	NaN	NaN	-0.26468	-0.00016639	NaN	NaN	NaN	NaN	96.199	0.66075	98.232	97.874	98.535	2.0331								0	0	0
doa10Δ(H)/WT(L) Rep1	APAAAPAASK	10	1	Unmodified	_APAAAPAASK_					0	0	0	0	P29547	P29547	P29547	CAM1	Elongation factor 1-gamma 1	MULTI-MATCH			2	427.74	853.466	95149.3	4.9264	0.0021072	0.075781	3.24e-05	5.0022	0.0021396	427.74	431.747	9.691	0.2418	10.521	10.398	10.64	0.83037	0.21072	0.00048087	NaN	64.103	96	25	7	NaN	NaN	NaN
doa10Δ(H)/WT(L) Rep1	KAPAAAPAASK	11	2	Unmodified	_KAPAAAPAASK_					0	0	0	1	P29547	P29547	P29547	CAM1	Elongation factor 1-gamma 1	MULTI-MATCH			2	491.788	981.561	84685.5	5.0869	0.0025017	-0.38202	-0.00018787	4.7049	0.0023138	491.787	499.802	7.6686	0.15286	8.3987	8.3326	8.4854	0.73012	0.12422	-0.00056365	NaN	56.551	39	15	5	NaN	NaN	NaN
doa10Δ(H)/WT(L) Rep1	WQSLANSDLCIQIANTIVPLKGGAPYNKK	29	3	Unmodified	_WQSLANSDLCIQIANTIVPLKGGAPYNKK_					0	0	0	2	P29547	P29547	P29547	CAM1	Elongation factor 1-gamma 1	MULTI-MATCH			4	800.679	3198.69	67451.5	5.5442	0.0044391	0.23111	0.00018504	5.7753	0.0046242	800.93	806.94	86.566	0.23085	88.8	88.633	88.864	2.2335	-0.019798	7.99e-05	NaN	18.919	69	23	5	NaN	NaN	NaN
doa10Δ(H)/WT(L) Rep1	DEKSKELYPLR	11	2	2 GlyGly (K)	_DEK(gl)SK(gl)ELYPLR_					0	2	0	2	P04817	P04817	P04817	CAN1	Arginine permease	MULTI-MATCH			3	535.946	1604.82	78825.6	5.2687	0.0028237	0.083497	4.48e-05	5.3522	0.0028685	536.281	541.623	34.655	0.24886	36.688	36.637	36.886	2.0331	-0.0031115	-6.65e-05	NaN	70.942	52	26	4	NaN	NaN	NaN
doa10Δ(H)/WT(L) Rep1	TNSKEDADIEEK	12	2	GlyGly (K)	_TNSK(gl)EDADIEEK_	TNSK(1)EDADIEEK		TNSK(63.43)EDADIEEK(-63.43)		0	1	0	1	P04817	P04817	P04817	CAN1	Arginine permease	MULTI-MSMS		503.576	3	498.23	1491.67	86186.2	5.5891	0.0027847	0.43228	0.00021537	6.0214	0.003	498.23	503.573	14.918	0.26552	16.15	16.014	16.279	1.2313					159	29	7	0	0	0
doa10Δ(H)/WT(L) Rep1	TNSKEDADIEEK	12	2	Acetyl (Protein N-term),GlyGly (K)	_(ac)TNSK(gl)EDADIEEK_	TNSK(1)EDADIEEK		TNSK(46.82)EDADIEEK(-46.82)		1	1	0	1	P04817	P04817	P04817	CAN1	Arginine permease	MULTI-MSMS		775.868	2	767.847	1533.68	67812	5.6453	0.0043347	0.5235	0.00040197	6.1688	0.0047367	767.847	775.862	25.017	0.34203	26.85	26.688	27.03	1.8327					205	33	8	0	0	0
doa10Δ(H)/WT(L) Rep1	ISIIIVSTK	9	1	Unmodified	_ISIIIVSTK_					0	0	0	0	P28495	P28495	P28495	CAP1	F-actin-capping protein subunit alpha	MULTI-MATCH			2	487.318	972.622	87540.8	5.4245	0.0026435	0.28761	0.00014016	5.7121	0.0027836	487.318	491.325	59.968	0.91237	62.001	61.647	62.56	2.0333	0.89523	0.00039249	NaN	82.831	369	95	5	NaN	NaN	NaN
doa10Δ(H)/WT(L) Rep1	ELSIVLAPFSGGQGK	15	1	Unmodified	_ELSIVLAPFSGGQGK_					0	0	0	0	P00812	P00812	P00812	CAR1	Arginase	MULTI-MATCH			2	751.914	1501.81	71646.4	5.4095	0.0040675	0.10899	8.2e-05	5.5185	0.0041495	751.914	755.922	81.117	0.26238	83.351	83.135	83.397	2.2335	0.65537	0.00091509	NaN	56.514	86	28	4	NaN	NaN	NaN
doa10Δ(H)/WT(L) Rep1	LVYNSVSK	8	1	Unmodified	_LVYNSVSK_					0	0	0	0	P00812	P00812	P00812	CAR1	Arginase	MULTI-MATCH			2	455.256	908.497	91658.8	5.4699	0.0024902	0.45185	0.00020571	5.9218	0.0026959	455.256	459.263	24.139	0.39756	25.972	25.8	26.198	1.8327	0.15745	0.0004464	NaN	68.371	133	40	5	NaN	NaN	NaN
doa10Δ(H)/WT(L) Rep1	AAQLGSSFIAQLK	13	1	Unmodified	_AAQLGSSFIAQLK_					0	0	0	0	P07991	P07991	P07991	CAR2	Ornithine aminotransferase	MULTI-MSMS		671.89	2	667.377	1332.74	73781.3	5.997	0.0040023	-0.17997	-0.00012011	5.817	0.0038821	667.878	671.385	69.139	0.68256	71.272	70.966	71.649	2.1334					285	71	6	0	0	0
doa10Δ(H)/WT(L) Rep1	GMGLLTAIVIDPSK	14	1	Oxidation (M)	_GM(ox)GLLTAIVIDPSK_					0	0	1	0	P07991	P07991	P07991	CAR2	Ornithine aminotransferase	MULTI-MATCH			2	715.9	1429.79	75857.3	5.8422	0.0041824	-0.086295	-6.18e-05	5.7559	0.0041206	715.899	719.907	78.261	0.44721	80.494	80.37	80.817	2.2335	0.012088	-0.00031503	NaN	44.44	115	45	5	NaN	NaN	NaN
doa10Δ(H)/WT(L) Rep1	TAWDLCLLMK	10	1	Unmodified	_TAWDLCLLMK_					0	0	0	0	P07991	P07991	P07991	CAR2	Ornithine aminotransferase	MULTI-MSMS		626.321	2	625.817	1249.62	75898.9	5.4521	0.003412	-0.32019	-0.00020038	5.1319	0.0032116	625.817	629.824	89.208	0.77769	91.341	91.003	91.781	2.1332					337	83	6	0	0	0
doa10Δ(H)/WT(L) Rep1	TFGAISLSTDYEDSKLHFGPFVPNVASGHSVHK	33	2	Unmodified	_TFGAISLSTDYEDSKLHFGPFVPNVASGHSVHK_					0	0	0	1	P07991	P07991	P07991	CAR2	Ornithine aminotransferase	MULTI-MATCH			5	709.756	3543.74	70648.6	5.4044	0.0038358	0.065621	4.66e-05	5.47	0.0038824	709.957	713.162	76.963	0.23156	79.197	79.041	79.273	2.2335	-0.25431	2.73e-05	NaN	27.632	81	24	6	NaN	NaN	NaN
doa10Δ(H)/WT(L) Rep1	SGHYTPIPAGSSPLKR	16	1	Unmodified	_SGHYTPIPAGSSPLKR_					0	0	0	1	P33322	P33322	P33322	CBF5	H/ACA ribonucleoprotein complex subunit 4	MULTI-MATCH			4	417.727	1666.88	93479.1	5.0718	0.0021186	0.9417	0.00039337	6.0135	0.002512	417.979	419.731	30.98	0.57535	32.912	32.575	33.15	1.9329	0.12552	0.00040968	NaN	29.618	178	59	5	NaN	NaN	NaN
doa10Δ(H)/WT(L) Rep1	SGHYTPIPAGSSPLKR	16	1	Unmodified	_SGHYTPIPAGSSPLKR_					0	0	0	1	P33322	P33322	P33322	CBF5	H/ACA ribonucleoprotein complex subunit 4	MULTI-MATCH			4	417.727	1666.88	94540.6	5.0527	0.0021107	0.69133	0.00028879	5.744	0.0023994	417.978	419.73	31.237	0.37333	33.17	33.024	33.397	1.9329	-0.049074	-0.00056848	NaN	23.531	97	37	4	NaN	NaN	NaN
doa10Δ(H)/WT(L) Rep1	VTGCLIVCIDR	11	0	Unmodified	_VTGCLIVCIDR_					0	0	0	0	P33322	P33322	P33322	CBF5	H/ACA ribonucleoprotein complex subunit 4	ISO-MSMS	-1	653.34	2	653.336	1304.66	NaN	NaN	NaN	0.052343	3.42e-05	NaN	NaN	NaN	NaN	62.861	0.61843	64.994	64.776	65.394	2.1334								0	0	0
doa10Δ(H)/WT(L) Rep1	VTGCLIVCIDR	11	0	Unmodified	_VTGCLIVCIDR_					0	0	0	0	P33322	P33322	P33322	CBF5	H/ACA ribonucleoprotein complex subunit 4	ISO-MSMS	-1	653.839	2	653.336	1304.66	NaN	NaN	NaN	-0.10857	-7.09e-05	NaN	NaN	NaN	NaN	63.414	0.3912	65.547	65.32	65.711	2.1334								0	0	0
doa10Δ(H)/WT(L) Rep1	VTGCLIVCIDR	11	0	Unmodified	_VTGCLIVCIDR_					0	0	0	0	P33322	P33322	P33322	CBF5	H/ACA ribonucleoprotein complex subunit 4	MSMS	-1	653.339	2	653.336	1304.66	NaN	NaN	NaN	NaN	NaN	NaN	NaN	NaN	NaN	62.224	1	64.357	63.857	64.857	2.1335								0	0	0
doa10Δ(H)/WT(L) Rep1	YIYSQLYVLSR	11	0	Unmodified	_YIYSQLYVLSR_					0	0	0	0	P21560	P21560	P21560	CBP3	Protein CBP3, mitochondrial	ISO-MSMS	-1	702.884	2	702.88	1403.74	NaN	NaN	NaN	0.2971	0.00020883	NaN	NaN	NaN	NaN	74.966	1.0481	77.2	76.766	77.815	2.2335								0	0	0
doa10Δ(H)/WT(L) Rep1	ANINGKDITR	10	1	GlyGly (K)	_ANINGK(gl)DITR_	ANINGK(1)DITR		ANINGK(95.48)DITR		0	1	0	1	P38626	P38626	P38626	CBR1	NADH-cytochrome b5 reductase 1	MULTI-MSMS		405.888	3	405.886	1214.64	92990.9	5.2581	0.0021342	-0.16689	-6.77e-05	5.0912	0.0020665	405.886	408.557	19.319	0.66447	20.751	20.418	21.082	1.4318					498	71	9	0	0	0
doa10Δ(H)/WT(L) Rep1	ANINGKDITR	10	1	GlyGly (K)	_ANINGK(gl)DITR_	ANINGK(1)DITR		ANINGK(73.5)DITR		0	1	0	1	P38626	P38626	P38626	CBR1	NADH-cytochrome b5 reductase 1	MULTI-MSMS		612.336	2	608.326	1214.64	77460.5	5.3414	0.0032493	0.14811	9.01e-05	5.4895	0.0033394	608.326	612.333	19.325	0.49212	20.757	20.516	21.008	1.4318					213	52	6	0	0	0
doa10Δ(H)/WT(L) Rep1	ANINGKDITR	10	1	GlyGly (K)	_ANINGK(gl)DITR_					0	1	0	1	P38626	P38626	P38626	CBR1	NADH-cytochrome b5 reductase 1	MULTI-MATCH			3	405.886	1214.64	94776.5	5.2103	0.0021148	0.41801	0.00016967	5.6283	0.0022844	405.886	408.558	19.673	0.24345	21.105	21.082	21.326	1.4318	-0.02964	0.00047993	NaN	90.827	63	27	4	NaN	NaN	NaN
doa10Δ(H)/WT(L) Rep1	TILTHNTSMYK	11	1	Unmodified	_TILTHNTSMYK_					0	0	0	0	P38626	P38626	P38626	CBR1	NADH-cytochrome b5 reductase 1	ISO-MSMS	0	436.894	3	436.892	1307.65	NaN	NaN	NaN	-0.59867	-0.00026156	NaN	NaN	NaN	NaN	28.662	0.36702	30.595	30.373	30.74	1.9329								0	0	0
doa10Δ(H)/WT(L) Rep1	NSAQDLENSPMSVGKDNR	18	1	GlyGly (K)	_NSAQDLENSPMSVGK(gl)DNR_	NSAQDLENSPMSVGK(1)DNR		NSAQDLENSPMSVGK(77.51)DNR		0	1	0	1	P47818	P47818	P47818	CCC1	Protein CCC1	MULTI-MSMS		692.655	3	692.652	2074.93	72102.7	5.5042	0.0038125	-0.19334	-0.00013392	5.3109	0.0036786	692.652	695.658	38.882	0.25851	40.915	40.776	41.034	2.0333					124	26	7	0	0	0
doa10Δ(H)/WT(L) Rep1	NSAQDLENSPMSVGKDNR	18	1	GlyGly (K)	_NSAQDLENSPMSVGK(gl)DNR_	NSAQDLENSPMSVGK(1)DNR		NSAQDLENSPMSVGK(73.28)DNR		0	1	0	1	P47818	P47818	P47818	CCC1	Protein CCC1	MULTI-MSMS		692.989	3	692.652	2074.93	72503.2	5.5863	0.0038694	-0.40433	-0.00028006	5.182	0.0035893	692.652	695.658	39.046	0.52544	41.08	40.827	41.353	2.0333					250	55	8	0	0	0
doa10Δ(H)/WT(L) Rep1	LQHIPSGDTIWAVTTHLHWDPK	22	1	Unmodified	_LQHIPSGDTIWAVTTHLHWDPK_					0	0	0	0	P31384	P31384	P31384	CCR4	Glucose-repressible alcohol dehydrogenase transcriptional effector	MULTI-MATCH			5	511.267	2551.3	NaN	5.4138	0.0027679	0.50718	0.0002593	5.921	0.0030272	511.468	513.07	79.468	0.085052	81.702	81.666	81.751	2.2335	-0.48126	0.0017226	NaN	29.729	14	8	4	NaN	NaN	NaN
doa10Δ(H)/WT(L) Rep1	SVTGLIFYLR	10	0	Unmodified	_SVTGLIFYLR_					0	0	0	0	P31384	P31384	P31384	CCR4	Glucose-repressible alcohol dehydrogenase transcriptional effector	ISO-MSMS	-1	584.843	2	584.84	1167.67	NaN	NaN	NaN	2.1443	0.0012541	NaN	NaN	NaN	NaN	87.135	0.74022	89.368	88.93	89.67	2.2335								0	0	0
doa10Δ(H)/WT(L) Rep1	DYSFLGVIAR	10	0	Unmodified	_DYSFLGVIAR_					0	0	0	0	P40202	P40202	P40202	CCS1	Superoxide dismutase 1 copper chaperone	ISO-MSMS	-1	570.81	2	570.806	1139.6	NaN	NaN	NaN	-0.70762	-0.00040391	NaN	NaN	NaN	NaN	85.841	0.58051	88.074	87.789	88.369	2.2335								0	0	0
doa10Δ(H)/WT(L) Rep1	TFLSAPLPTWQLIGR	15	0	Unmodified	_TFLSAPLPTWQLIGR_					0	0	0	0	P40202	P40202	P40202	CCS1	Superoxide dismutase 1 copper chaperone	ISO-MSMS	-1	567.326	3	567.323	1698.95	NaN	NaN	NaN	-0.3829	-0.00021723	NaN	NaN	NaN	NaN	98.67	0.38168	100.8	100.47	100.85	2.1334								0	0	0
doa10Δ(H)/WT(L) Rep1	TFLSAPLPTWQLIGR	15	0	Unmodified	_TFLSAPLPTWQLIGR_					0	0	0	0	P40202	P40202	P40202	CCS1	Superoxide dismutase 1 copper chaperone	ISO-MSMS	-1	850.985	2	850.48	1698.95	NaN	NaN	NaN	-0.23801	-0.00020243	NaN	NaN	NaN	NaN	98.724	1.0641	100.86	100.37	101.43	2.1334								0	0	0
doa10Δ(H)/WT(L) Rep1	SIPLDNPAAKVLVNISK	17	2	GlyGly (K)	_SIPLDNPAAK(gl)VLVNISK_	SIPLDNPAAK(0.954)VLVNISK(0.046)		SIPLDNPAAK(13.15)VLVNISK(-13.15)		0	1	0	1	P39076	P39076	P39076	CCT2	T-complex protein 1 subunit beta	MULTI-MSMS		637.379	3	631.698	1892.07	76485.6	5.3183	0.0033595	0.60786	0.00038398	5.9261	0.0037435	632.033	637.041	77.555	0.90483	79.788	79.484	80.388	2.2335					225	94	5	0	0	0
doa10Δ(H)/WT(L) Rep1	TVLGGGCAEMVMSK	14	1	Unmodified	_TVLGGGCAEMVMSK_					0	0	0	0	P39076	P39076	P39076	CCT2	T-complex protein 1 subunit beta	MULTI-SECPEP		723.877	2	720.338	1438.66	75042.8	6.0068	0.004327	-0.36713	-0.00026446	5.6397	0.0040625	720.338	724.345	52.098	0.29212	54.232	54.101	54.393	2.1335					86	30	5	0	0	0
doa10Δ(H)/WT(L) Rep1	TAIESACLLLR	11	0	Unmodified	_TAIESACLLLR_					0	0	0	0	P39077	P39077	P39077	CCT3	T-complex protein 1 subunit gamma	ISO-MSMS	-1	623.848	2	623.845	1245.68	NaN	NaN	NaN	-0.29353	-0.00018312	NaN	NaN	NaN	NaN	66.298	0.82722	68.431	68.221	69.048	2.1334								0	0	0
doa10Δ(H)/WT(L) Rep1	AASTSLSSK	9	1	Unmodified	_AASTSLSSK_					0	0	0	0	P39078	P39078	P39078	CCT4	T-complex protein 1 subunit delta	ISO-MSMS	0	426.229	2	426.227	850.44	NaN	NaN	NaN	0.52032	0.00022177	NaN	NaN	NaN	NaN	9.5356	0.30541	10.366	10.273	10.578	0.83037								0	0	0
doa10Δ(H)/WT(L) Rep1	KDVDFDLIK	9	2	GlyGly (K)	_K(gl)DVDFDLIK_					0	1	0	1	P40413	P40413	P40413	CCT5	T-complex protein 1 subunit epsilon	MULTI-MATCH			2	603.822	1205.63	76150.5	5.2161	0.0031496	0.61097	0.00036892	5.827	0.0035185	604.322	611.837	38.576	1.1869	40.609	40.145	41.332	2.0333	-0.41071	0.00029605	NaN	49.06	375	122	6	NaN	NaN	NaN
doa10Δ(H)/WT(L) Rep1	TFSYAGFEQQPK	12	1	Unmodified	_TFSYAGFEQQPK_					0	0	0	0	P42943	P42943	P42943	CCT7	T-complex protein 1 subunit eta	MULTI-MSMS		701.839	2	701.836	1401.66	71534.2	5.6291	0.0039507	0.092723	6.51e-05	5.7218	0.0040158	701.836	705.843	54.282	0.52085	56.315	56.059	56.58	2.0333					185	56	6	0	0	0
doa10Δ(H)/WT(L) Rep1	IMGGSLSNSTVIK	13	1	Unmodified	_IMGGSLSNSTVIK_					0	0	0	0	P47079	P47079	P47079	CCT8	T-complex protein 1 subunit theta	MULTI-MATCH			2	653.855	1305.7	74716.2	5.6055	0.0036652	0.57083	0.00037324	6.1763	0.0040384	653.856	657.863	46.106	0.31911	48.139	47.958	48.277	2.0333	0.4488	0.00060245	NaN	56.295	84	33	4	NaN	NaN	NaN
doa10Δ(H)/WT(L) Rep1	QFAVAFEVVPR	11	0	Unmodified	_QFAVAFEVVPR_					0	0	0	0	P47079	P47079	P47079	CCT8	T-complex protein 1 subunit theta	ISO-MSMS	-1	631.851	2	631.848	1261.68	NaN	NaN	NaN	0.35947	0.00022713	NaN	NaN	NaN	NaN	75.07	0.49174	77.303	77.177	77.668	2.2335								0	0	0
doa10Δ(H)/WT(L) Rep1	TPGLLQLAIK	10	1	Unmodified	_TPGLLQLAIK_					0	0	0	0	P47079	P47079	P47079	CCT8	T-complex protein 1 subunit theta	MULTI-SECPEP		530.814	2	527.337	1052.66	84720	5.6701	0.0029901	-0.36446	-0.0001922	5.3057	0.0027979	527.337	531.344	72.065	0.64502	74.199	73.941	74.586	2.1334					250	72	5	0	0	0
doa10Δ(H)/WT(L) Rep1	TSTIILR	7	0	Unmodified	_TSTIILR_					0	0	0	0	P47079	P47079	P47079	CCT8	T-complex protein 1 subunit theta	ISO-MSMS	-1	402.255	2	402.253	802.491	NaN	NaN	NaN	0.23871	9.6e-05	NaN	NaN	NaN	NaN	33.202	0.6032	35.235	34.939	35.542	2.0331								0	0	0
doa10Δ(H)/WT(L) Rep1	VFTRPDGNTSDLPLPTSISKSK	22	2	GlyGly (K)	_VFTRPDGNTSDLPLPTSISK(gl)SK_	VFTRPDGNTSDLPLPTSISK(0.775)SK(0.225)		VFTRPDGNTSDLPLPTSISK(5.37)SK(-5.37)		0	1	0	2	P40986	P40986	P40986	CDC1	Cell division control protein 1	MULTI-MSMS		623.338	4	619.328	2473.28	75254.9	5.3734	0.0033279	0.25547	0.00015822	5.6288	0.0034861	619.578	623.586	55.868	0.78884	57.901	57.67	58.459	2.0333					379	82	10	0	0	0
doa10Δ(H)/WT(L) Rep1	VFTRPDGNTSDLPLPTSISKSK	22	2	GlyGly (K)	_VFTRPDGNTSDLPLPTSISKSK(gl)_	VFTRPDGNTSDLPLPTSISK(0.444)SK(0.556)		VFTRPDGNTSDLPLPTSISK(-0.98)SK(0.98)		0	1	0	2	P40986	P40986	P40986	CDC1	Cell division control protein 1	ISO-MSMS	0	619.581	4	619.328	2473.28	NaN	NaN	NaN	0.15873	9.83e-05	NaN	NaN	NaN	NaN	56.129	0.56404	58.162	58.037	58.602	2.0333								0	0	0
doa10Δ(H)/WT(L) Rep1	VFTRPDGNTSDLPLPTSISKSK	22	2	GlyGly (K)	_VFTRPDGNTSDLPLPTSISK(gl)SK_					0	1	0	2	P40986	P40986	P40986	CDC1	Cell division control protein 1	MULTI-MATCH			4	619.328	2473.28	75460	5.2734	0.003266	0.20728	0.00012837	5.4807	0.0033944	619.828	623.586	56.599	0.20809	58.633	58.546	58.754	2.0333	0.66288	-0.0014804	NaN	113.78	62	20	8	NaN	NaN	NaN
doa10Δ(H)/WT(L) Rep1	SSAHMSSNAIQR	12	0	Unmodified	_SSAHMSSNAIQR_					0	0	0	0	P25342	P25342	P25342	CDC10	Cell division control protein 10	ISO-MSMS	-1	430.209	3	430.207	1287.6	NaN	NaN	NaN	0.28252	0.00012154	NaN	NaN	NaN	NaN	14.118	0.46427	15.35	15.13	15.594	1.2313								0	0	0
doa10Δ(H)/WT(L) Rep1	VHAILYFLQPNGK	13	1	Unmodified	_VHAILYFLQPNGK_					0	0	0	0	P25342	P25342	P25342	CDC10	Cell division control protein 10	MULTI-MSMS		500.62	3	500.617	1498.83	83050.4	5.6138	0.0028103	1.0707	0.00053599	6.6844	0.0033463	500.617	503.289	70.792	1.4119	72.926	72.465	73.877	2.1334					424	151	7	0	0	0
doa10Δ(H)/WT(L) Rep1	VHAILYFLQPNGK	13	1	Unmodified	_VHAILYFLQPNGK_					0	0	0	0	P25342	P25342	P25342	CDC10	Cell division control protein 10	MSMS	0	500.62	3	500.617	1498.83	NaN	NaN	NaN	NaN	NaN	NaN	NaN	NaN	NaN	71.086	1	73.22	72.72	73.72	2.1334								0	0	0
doa10Δ(H)/WT(L) Rep1	VHAILYFLQPNGK	13	1	Unmodified	_VHAILYFLQPNGK_					0	0	0	0	P25342	P25342	P25342	CDC10	Cell division control protein 10	MULTI-MATCH			2	750.422	1498.83	71845.4	5.7066	0.0042823	-0.48921	-0.00036711	5.2174	0.0039152	750.422	754.429	70.796	0.24002	72.93	72.886	73.127	2.1334	-0.11378	-0.00082868	NaN	73.632	49	26	4	NaN	NaN	NaN
doa10Δ(H)/WT(L) Rep1	VHAILYFLQPNGK	13	1	Unmodified	_VHAILYFLQPNGK_					0	0	0	0	P25342	P25342	P25342	CDC10	Cell division control protein 10	MULTI-MATCH			3	500.617	1498.83	85184.7	5.6505	0.0028287	1.4737	0.00073777	7.1242	0.0035665	500.617	503.29	71.764	0.12855	73.897	73.85	73.978	2.1334	0.35324	0.00051997	NaN	120.06	35	13	4	NaN	NaN	NaN
doa10Δ(H)/WT(L) Rep1	LNGSSSSSTTTR	12	0	Unmodified	_LNGSSSSSTTTR_					0	0	0	0	P32458	P32458	P32458	CDC11	Cell division control protein 11	ISO-MSMS	-1	599.293	2	599.289	1196.56	NaN	NaN	NaN	1.1142	0.00066774	NaN	NaN	NaN	NaN	8.3632	0.11281	9.1936	9.1283	9.2411	0.83037								0	0	0
doa10Δ(H)/WT(L) Rep1	IFTPPLDADSK	11	1	Unmodified	_IFTPPLDADSK_					0	0	0	0	P32468	P32468	P32468	CDC12	Cell division control protein 12	ISO-MSMS	0	602.318	2	602.316	1202.62	NaN	NaN	NaN	-1.6464	-0.00099163	NaN	NaN	NaN	NaN	105.03	0.28317	106.86	106.82	107.1	1.8327								0	0	0
doa10Δ(H)/WT(L) Rep1	SGSNPDSAAVEHAR	14	0	Unmodified	_SGSNPDSAAVEHAR_					0	0	0	0	P32468	P32468	P32468	CDC12	Cell division control protein 12	ISO-MSMS	-1	466.555	3	466.552	1396.63	NaN	NaN	NaN	-0.46207	-0.00021558	NaN	NaN	NaN	NaN	15.126	0.27476	16.357	16.233	16.508	1.2313								0	0	0
doa10Δ(H)/WT(L) Rep1	TTFINTLFQTVLK	13	1	Unmodified	_TTFINTLFQTVLK_					0	0	0	0	P32468	P32468	P32468	CDC12	Cell division control protein 12	MULTI-MSMS		767.446	2	763.435	1524.86	69357.4	5.241	0.0040011	-0.64517	-0.00049255	4.5958	0.0035086	763.434	767.442	110.02	0.447	111.55	111.17	111.62	1.5319					220	48	9	0	0	0
doa10Δ(H)/WT(L) Rep1	TTFINTLFQTVLK	13	1	Unmodified	_TTFINTLFQTVLK_					0	0	0	0	P32468	P32468	P32468	CDC12	Cell division control protein 12	MULTI-MSMS		767.447	2	763.435	1524.86	69357.5	5.2031	0.0039722	-0.26926	-0.00020556	4.9339	0.0037667	763.435	767.442	110.1	0.41696	111.64	111.58	112	1.5319					215	48	8	0	0	0
doa10Δ(H)/WT(L) Rep1	TTFINTLFQTVLKR	14	1	Unmodified	_TTFINTLFQTVLKR_					0	0	0	1	P32468	P32468	P32468	CDC12	Cell division control protein 12	MULTI-MSMS		564.334	3	561.326	1680.96	78530	5.2278	0.0029345	0.33225	0.0001865	5.5601	0.003121	561.326	563.998	100.16	0.56399	102.2	101.72	102.28	2.0331					311	63	8	0	0	0
doa10Δ(H)/WT(L) Rep1	TTFINTLFQTVLKR	14	1	Unmodified	_TTFINTLFQTVLKR_					0	0	0	1	P32468	P32468	P32468	CDC12	Cell division control protein 12	MULTI-MSMS		564	3	561.326	1680.96	78584.9	5.1953	0.0029162	0.20675	0.00011605	5.402	0.0030323	561.326	563.998	100.48	0.29408	102.52	102.28	102.57	2.0331					243	33	9	0	0	0
doa10Δ(H)/WT(L) Rep1	TTFINTLFQTVLKR	14	1	Unmodified	_TTFINTLFQTVLKR_					0	0	0	1	P32468	P32468	P32468	CDC12	Cell division control protein 12	MULTI-SECPEP		561.663	3	561.326	1680.96	78396.3	5.2134	0.0029264	-0.13759	-7.72e-05	5.0758	0.0028492	561.326	564.332	100.92	0.47371	102.96	102.87	103.35	2.0331					99	49	6	0	0	0
doa10Δ(H)/WT(L) Rep1	TTFINTLFQTVLKR	14	1	Unmodified	_TTFINTLFQTVLKR_					0	0	0	1	P32468	P32468	P32468	CDC12	Cell division control protein 12	MULTI-MATCH			3	561.326	1680.96	82161.6	5.2272	0.0029342	-0.20458	-0.00011484	5.0226	0.0028193	561.326	563.997	101.6	0.21533	103.64	103.55	103.77	2.0331	0.7266	-0.00062298	NaN	166.62	50	21	4	NaN	NaN	NaN
doa10Δ(H)/WT(L) Rep1	TTFINTLFQTVLKR	14	1	Unmodified	_TTFINTLFQTVLKR_					0	0	0	1	P32468	P32468	P32468	CDC12	Cell division control protein 12	MULTI-MATCH			3	561.326	1680.96	78475.2	5.2	0.0029189	0.2712	0.00015223	5.4712	0.0030711	561.326	563.998	100.6	0.4993	102.63	102.56	103.06	2.0331	-0.38029	6.72e-05	NaN	83.877	284	53	7	NaN	NaN	NaN
doa10Δ(H)/WT(L) Rep1	TVEIDITR	8	0	Unmodified	_TVEIDITR_					0	0	0	0	P32468	P32468	P32468	CDC12	Cell division control protein 12	ISO-MSMS	-1	473.766	2	473.764	945.513	NaN	NaN	NaN	-0.1659	-7.86e-05	NaN	NaN	NaN	NaN	43.741	0.56576	45.774	45.523	46.088	2.0333								0	0	0
doa10Δ(H)/WT(L) Rep1	VHAVLYFIRPTGHGLKPIDIETMK	24	2	Unmodified	_VHAVLYFIRPTGHGLKPIDIETMK_					0	0	0	2	P32468	P32468	P32468	CDC12	Cell division control protein 12	MULTI-MATCH			5	547.907	2734.5	80055.1	5.7035	0.003125	0.16037	8.79e-05	5.8638	0.0032128	548.108	551.313	68.839	0.088081	70.973	70.914	71.002	2.1334	0.18469	8e-05	NaN	36.217	35	9	5	NaN	NaN	NaN
doa10Δ(H)/WT(L) Rep1	ACDDKIMYVDYK	12	2	Unmodified	_ACDDKIMYVDYK_					0	0	0	1	P00549	P00549	P00549	CDC19	Pyruvate kinase 1	MULTI-MSMS		507.567	3	507.564	1519.67	81092.4	4.9802	0.0025278	0.029099	1.48e-05	5.0093	0.0025426	507.564	512.906	46.134	0.49331	48.167	47.882	48.376	2.0333					305	52	9	0	0	0
doa10Δ(H)/WT(L) Rep1	AEVSDVGNAILDGADCVMLSGETAK	25	1	Unmodified	_AEVSDVGNAILDGADCVMLSGETAK_					0	0	0	0	P00549	P00549	P00549	CDC19	Pyruvate kinase 1	MULTI-MSMS		844.407	3	841.396	2521.17	64830	5.4349	0.0045729	-0.42697	-0.00035925	5.0079	0.0042136	841.731	844.402	96.381	0.64693	98.514	98.269	98.916	2.1334					552	67	13	0	0	0
doa10Δ(H)/WT(L) Rep1	AEVSDVGNAILDGADCVMLSGETAK	25	1	Unmodified	_AEVSDVGNAILDGADCVMLSGETAK_					0	0	0	0	P00549	P00549	P00549	CDC19	Pyruvate kinase 1	MULTI-MATCH			2	1261.59	2521.17	55818.9	4.6808	0.0059052	0.083735	0.00010564	4.7645	0.0060109	1262.09	1265.6	96.334	0.34792	98.468	98.334	98.682	2.1334	-0.17161	0.0012859	NaN	53.281	97	35	5	NaN	NaN	NaN
doa10Δ(H)/WT(L) Rep1	AEVSDVGNAILDGADCVMLSGETAK	25	1	Unmodified	_AEVSDVGNAILDGADCVMLSGETAK_					0	0	0	0	P00549	P00549	P00549	CDC19	Pyruvate kinase 1	MULTI-MATCH			4	631.299	2521.17	80485.4	5.432	0.0034292	-0.053199	-3.36e-05	5.3788	0.0033956	631.55	633.553	96.446	0.1846	98.58	98.479	98.663	2.1334	-0.46379	-0.0004134	NaN	33.594	52	18	6	NaN	NaN	NaN
doa10Δ(H)/WT(L) Rep1	AGAGHSNTLQVSTV	14	0	Unmodified	_AGAGHSNTLQVSTV_					0	0	0	0	P00549	P00549	P00549	CDC19	Pyruvate kinase 1	ISO-MSMS	-1	671.346	2	671.341	1340.67	NaN	NaN	NaN	0.518	0.00034776	NaN	NaN	NaN	NaN	33.294	0.90184	35.327	34.922	35.824	2.0331								0	0	0
doa10Δ(H)/WT(L) Rep1	AIIVLSTSGTTPR	13	0	Unmodified	_AIIVLSTSGTTPR_					0	0	0	0	P00549	P00549	P00549	CDC19	Pyruvate kinase 1	ISO-MSMS	-1	658.386	2	658.383	1314.75	NaN	NaN	NaN	-0.083255	-5.48e-05	NaN	NaN	NaN	NaN	52.256	1.3884	54.389	53.923	55.312	2.1335								0	0	0
doa10Δ(H)/WT(L) Rep1	AIIVLSTSGTTPR	13	0	Unmodified	_AIIVLSTSGTTPR_					0	0	0	0	P00549	P00549	P00549	CDC19	Pyruvate kinase 1	ISO-MSMS	-1	439.259	3	439.258	1314.75	NaN	NaN	NaN	-0.22617	-9.93e-05	NaN	NaN	NaN	NaN	52.298	0.78836	54.432	54.167	54.955	2.1335								0	0	0
doa10Δ(H)/WT(L) Rep1	AIIVLSTSGTTPR	13	0	Unmodified	_AIIVLSTSGTTPR_					0	0	0	0	P00549	P00549	P00549	CDC19	Pyruvate kinase 1	ISO-MSMS	-1	658.386	2	658.383	1314.75	NaN	NaN	NaN	-0.2254	-0.0001484	NaN	NaN	NaN	NaN	53.227	0.45488	55.36	55.271	55.726	2.1335								0	0	0
doa10Δ(H)/WT(L) Rep1	AIIVLSTSGTTPR	13	0	Unmodified	_AIIVLSTSGTTPR_					0	0	0	0	P00549	P00549	P00549	CDC19	Pyruvate kinase 1	ISO-MSMS	-1	658.386	2	658.383	1314.75	NaN	NaN	NaN	0.05159	3.4e-05	NaN	NaN	NaN	NaN	53.705	0.32462	55.839	55.718	56.042	2.1335								0	0	0
doa10Δ(H)/WT(L) Rep1	AIIVLSTSGTTPR	13	0	Unmodified	_AIIVLSTSGTTPR_					0	0	0	0	P00549	P00549	P00549	CDC19	Pyruvate kinase 1	ISO-MSMS	-1	658.887	2	658.383	1314.75	NaN	NaN	NaN	0.055602	3.66e-05	NaN	NaN	NaN	NaN	54.079	0.29967	56.112	55.933	56.232	2.0333								0	0	0
doa10Δ(H)/WT(L) Rep1	AIIVLSTSGTTPR	13	0	Unmodified	_AIIVLSTSGTTPR_					0	0	0	0	P00549	P00549	P00549	CDC19	Pyruvate kinase 1	ISO-MSMS	-1	658.387	2	658.383	1314.75	NaN	NaN	NaN	-0.24775	-0.00016311	NaN	NaN	NaN	NaN	56.252	0.22711	58.285	58.136	58.364	2.0333								0	0	0
doa10Δ(H)/WT(L) Rep1	ALNAGKICSHK	11	2	GlyGly (K)	_ALNAGK(gl)ICSHK_					0	1	0	1	P00549	P00549	P00549	CDC19	Pyruvate kinase 1	MULTI-MATCH			3	438.231	1311.67	89966	5.4204	0.0023754	-0.29595	-0.0001297	5.1244	0.0022457	438.231	443.574	14.277	0.67655	15.509	15.279	15.955	1.2313	0.15276	-0.00069116	NaN	86.344	214	72	6	NaN	NaN	NaN
doa10Δ(H)/WT(L) Rep1	EVLGEQGKDVKIIVK	15	3	GlyGly (K)	_EVLGEQGKDVK(gl)IIVK_					0	1	0	2	P00549	P00549	P00549	CDC19	Pyruvate kinase 1	MULTI-MATCH			4	443.01	1768.01	92434.4	5.5283	0.0024491	-0.11128	-4.93e-05	5.417	0.0023998	443.01	449.02	42.212	0.52547	44.245	43.96	44.485	2.0333	0.48331	-0.00039264	NaN	73.877	174	55	5	NaN	NaN	NaN
doa10Δ(H)/WT(L) Rep1	FGVKNGVHMVFASFIR	16	1	Unmodified	_FGVKNGVHMVFASFIR_					0	0	0	1	P00549	P00549	P00549	CDC19	Pyruvate kinase 1	MULTI-MSMS		606.668	3	603.659	1807.96	76736.9	5.6249	0.0033955	-0.31136	-0.00018795	5.3135	0.0032076	603.993	606.33	76.27	0.43335	78.503	78.342	78.776	2.2335					190	46	7	0	0	0
doa10Δ(H)/WT(L) Rep1	FGVKNGVHMVFASFIR	16	1	Unmodified	_FGVKNGVHMVFASFIR_					0	0	0	1	P00549	P00549	P00549	CDC19	Pyruvate kinase 1	MULTI-MSMS		455.253	4	452.996	1807.96	89851	5.1995	0.0023553	0.14405	6.53e-05	5.3435	0.0024206	453.247	455	77.159	0.29568	79.393	79.215	79.511	2.2335					102	31	5	0	0	0
doa10Δ(H)/WT(L) Rep1	FGVKNGVHMVFASFIR	16	1	Unmodified	_FGVKNGVHMVFASFIR_					0	0	0	1	P00549	P00549	P00549	CDC19	Pyruvate kinase 1	MULTI-SECPEP		454.235	4	452.996	1807.96	90033	5.642	0.0025558	0.058511	2.65e-05	5.7005	0.0025823	453.248	455	75.383	0.75775	77.616	77.177	77.934	2.2335					174	78	6	0	0	0
doa10Δ(H)/WT(L) Rep1	FGVKNGVHMVFASFIR	16	1	Unmodified	_FGVKNGVHMVFASFIR_					0	0	0	1	P00549	P00549	P00549	CDC19	Pyruvate kinase 1	MULTI-SECPEP		454.569	4	452.996	1807.96	90395.1	5.2222	0.0023656	0.12339	5.59e-05	5.3456	0.0024215	452.996	455.25	77.395	0.42639	79.628	79.455	79.882	2.2335					95	44	5	0	0	0
doa10Δ(H)/WT(L) Rep1	FGVKNGVHMVFASFIR	16	1	Unmodified	_FGVKNGVHMVFASFIR_					0	0	0	1	P00549	P00549	P00549	CDC19	Pyruvate kinase 1	MULTI-SECPEP		454.235	4	452.996	1807.96	89149.2	5.5613	0.0025192	0.043694	1.98e-05	5.605	0.002539	453.247	455.25	75.92	0.43626	78.153	77.934	78.371	2.2335					121	44	5	0	0	0
doa10Δ(H)/WT(L) Rep1	FGVKNGVHMVFASFIR	16	1	Unmodified	_FGVKNGVHMVFASFIR_					0	0	0	1	P00549	P00549	P00549	CDC19	Pyruvate kinase 1	MULTI-MATCH			3	603.659	1807.96	76917.7	5.801	0.0035018	-0.43243	-0.00026104	5.3686	0.0032408	603.993	606.664	75.464	0.7682	77.698	77.315	78.083	2.2335	-0.32333	-0.00068054	NaN	49.621	214	78	5	NaN	NaN	NaN
doa10Δ(H)/WT(L) Rep1	FGVKNGVHMVFASFIR	16	1	Unmodified	_FGVKNGVHMVFASFIR_					0	0	0	1	P00549	P00549	P00549	CDC19	Pyruvate kinase 1	MULTI-MATCH			4	452.996	1807.96	90837.9	5.7165	0.0025896	0.23232	0.00010524	5.9488	0.0026948	453.247	455	78.938	0.12179	81.172	81.078	81.2	2.2335	0.22558	0.0014778	NaN	26.292	30	12	6	NaN	NaN	NaN
doa10Δ(H)/WT(L) Rep1	FGVKNGVHMVFASFIR	16	1	Unmodified	_FGVKNGVHMVFASFIR_					0	0	0	1	P00549	P00549	P00549	CDC19	Pyruvate kinase 1	MULTI-MATCH			4	452.996	1807.96	96370	5.7807	0.0026186	-0.40363	-0.00018284	5.3771	0.0024358	453.247	455	79.551	0.086678	81.784	81.732	81.818	2.2335	-0.003234	0.00022295	NaN	36.993	22	8	5	NaN	NaN	NaN
doa10Δ(H)/WT(L) Rep1	FGVKNGVHMVFASFIR	16	1	Unmodified	_FGVKNGVHMVFASFIR_					0	0	0	1	P00549	P00549	P00549	CDC19	Pyruvate kinase 1	MULTI-MATCH			4	452.996	1807.96	89150.3	5.6952	0.0025799	-0.27739	-0.00012566	5.4178	0.0024542	453.247	455.25	75.01	0.28195	77.244	77.1	77.382	2.2335	0.02095	-1.45e-05	NaN	42.52	70	29	6	NaN	NaN	NaN
doa10Δ(H)/WT(L) Rep1	FGVKNGVHMVFASFIR	16	1	Unmodified	_FGVKNGVHMVFASFIR_					0	0	0	1	P00549	P00549	P00549	CDC19	Pyruvate kinase 1	MULTI-MATCH			4	452.996	1807.96	89693.8	5.2992	0.0024005	-0.27067	-0.00012261	5.0286	0.0022779	453.247	455	76.85	0.51311	79.083	78.75	79.263	2.2335	0.034715	-0.00011077	NaN	56.29	176	55	6	NaN	NaN	NaN
doa10Δ(H)/WT(L) Rep1	FGVKNGVHMVFASFIR	16	1	Oxidation (M)	_FGVKNGVHM(ox)VFASFIR_					0	0	1	1	P00549	P00549	P00549	CDC19	Pyruvate kinase 1	MULTI-MATCH			4	456.995	1823.95	90424.5	5.4057	0.0024704	0.44455	0.00020316	5.8503	0.0026735	457.246	459.249	67.127	0.28681	69.261	69.039	69.326	2.1334	-0.43774	0.00070359	NaN	68.283	67	28	4	NaN	NaN	NaN
doa10Δ(H)/WT(L) Rep1	GDLGIEIPAPEVLAVQK	17	1	Unmodified	_GDLGIEIPAPEVLAVQK_					0	0	0	0	P00549	P00549	P00549	CDC19	Pyruvate kinase 1	MULTI-MATCH			2	874.993	1747.97	66861.1	5.5454	0.0048522	0.0017052	1.49e-06	5.5471	0.0048536	874.993	879	86.459	0.51191	88.693	88.388	88.9	2.2335	1.0449	-0.00045381	NaN	92.8	175	53	6	NaN	NaN	NaN
doa10Δ(H)/WT(L) Rep1	GDTYVSIQGFK	11	1	Unmodified	_GDTYVSIQGFK_					0	0	0	0	P00549	P00549	P00549	CDC19	Pyruvate kinase 1	MULTI-MSMS		611.816	2	607.806	1213.6	77404.6	5.2946	0.0032181	0.34476	0.00020955	5.6394	0.0034276	607.806	611.813	57.125	0.52536	59.158	58.877	59.402	2.0333					208	55	5	0	0	0
doa10Δ(H)/WT(L) Rep1	GVFPFVFEKEPVSDWTDDVEAR	22	1	Unmodified	_GVFPFVFEKEPVSDWTDDVEAR_					0	0	0	1	P00549	P00549	P00549	CDC19	Pyruvate kinase 1	MULTI-MSMS		857.419	3	857.08	2568.22	66164	5.448	0.0046693	-0.064411	-5.52e-05	5.3836	0.0046141	857.414	860.086	96.869	0.4296	99.003	98.644	99.074	2.1334					210	45	8	0	0	0
doa10Δ(H)/WT(L) Rep1	GVFPFVFEKEPVSDWTDDVEAR	22	1	Unmodified	_GVFPFVFEKEPVSDWTDDVEAR_					0	0	0	1	P00549	P00549	P00549	CDC19	Pyruvate kinase 1	MULTI-MSMS		859.755	3	857.08	2568.22	66267.8	5.3954	0.0046243	-0.19784	-0.00016956	5.1976	0.0044548	857.414	860.085	97.03	0.82425	99.163	98.605	99.429	2.1334					268	86	10	0	0	0
doa10Δ(H)/WT(L) Rep1	GVFPFVFEKEPVSDWTDDVEAR	22	1	Unmodified	_GVFPFVFEKEPVSDWTDDVEAR_					0	0	0	1	P00549	P00549	P00549	CDC19	Pyruvate kinase 1	MULTI-MSMS		857.418	3	857.08	2568.22	66164.8	5.3163	0.0045565	-0.011218	-9.61e-06	5.3051	0.0045469	857.414	859.751	97.181	0.75675	99.315	99.228	99.985	2.1334					434	78	9	0	0	0
doa10Δ(H)/WT(L) Rep1	GVFPFVFEKEPVSDWTDDVEAR	22	1	Unmodified	_GVFPFVFEKEPVSDWTDDVEAR_					0	0	0	1	P00549	P00549	P00549	CDC19	Pyruvate kinase 1	MULTI-MATCH			3	857.08	2568.22	66371.1	5.493	0.0047079	0.065594	5.62e-05	5.5586	0.0047642	857.749	860.42	96.637	0.2959	98.77	98.537	98.833	2.1334	-0.77815	0.00098122	NaN	78.554	120	30	8	NaN	NaN	NaN
doa10Δ(H)/WT(L) Rep1	GVFPFVFEKEPVSDWTDDVEAR	22	1	GlyGly (K)	_GVFPFVFEK(gl)EPVSDWTDDVEAR_					0	1	0	1	P00549	P00549	P00549	CDC19	Pyruvate kinase 1	MULTI-MATCH			3	895.094	2682.26	64913.7	5.3059	0.0047493	0.19148	0.00017139	5.4974	0.0049207	895.428	898.1	97.512	0.56901	99.645	99.387	99.956	2.1334	-0.070118	0.0010854	NaN	54.828	197	58	6	NaN	NaN	NaN
doa10Δ(H)/WT(L) Rep1	GVNLPGTDVDLPALSEK	17	1	Unmodified	_GVNLPGTDVDLPALSEK_					0	0	0	0	P00549	P00549	P00549	CDC19	Pyruvate kinase 1	MULTI-MSMS		866.97	2	862.957	1723.9	65274.8	5.6719	0.0048946	0.39109	0.0003375	6.063	0.0052321	863.459	866.964	78.511	0.51664	80.745	80.508	81.025	2.2335					252	54	6	0	0	0
doa10Δ(H)/WT(L) Rep1	GVNLPGTDVDLPALSEKDKEDLR	23	2	Unmodified	_GVNLPGTDVDLPALSEKDKEDLR_					0	0	0	2	P00549	P00549	P00549	CDC19	Pyruvate kinase 1	MULTI-MSMS		621.333	4	621.076	2480.28	75640.8	5.5253	0.0034316	1.6401	0.0010187	7.1654	0.0044503	621.329	625.335	68.672	0.20573	70.805	70.7	70.905	2.1334					100	22	8	0	0	0
doa10Δ(H)/WT(L) Rep1	GVNLPGTDVDLPALSEKDKEDLR	23	2	Unmodified	_GVNLPGTDVDLPALSEKDKEDLR_					0	0	0	2	P00549	P00549	P00549	CDC19	Pyruvate kinase 1	MULTI-MSMS		621.08	4	621.076	2480.28	75934.3	5.5881	0.0034706	-0.11918	-7.4e-05	5.4689	0.0033966	621.327	625.334	68.906	0.65182	71.04	70.812	71.464	2.1334					371	70	10	0	0	0
doa10Δ(H)/WT(L) Rep1	IMYVDYKNITK	11	2	GlyGly (K)	_IMYVDYK(gl)NITK_					0	1	0	1	P00549	P00549	P00549	CDC19	Pyruvate kinase 1	MULTI-MATCH			3	501.262	1500.76	83558.8	5.3596	0.0026866	-0.89524	-0.00044875	4.4644	0.0022378	501.262	506.604	50.939	0.75647	53.072	52.544	53.301	2.1335	-0.0344	-0.00052996	NaN	44.612	250	76	6	NaN	NaN	NaN
doa10Δ(H)/WT(L) Rep1	INFGIEK	7	1	Unmodified	_INFGIEK_					0	0	0	0	P00549	P00549	P00549	CDC19	Pyruvate kinase 1	MULTI-MATCH			2	410.732	819.449	96039.5	5.158	0.0021186	0.53698	0.00022055	5.695	0.0023391	410.731	414.738	45.483	0.60831	47.516	47.21	47.818	2.0333	-0.12954	0.00029009	NaN	101.33	280	71	6	NaN	NaN	NaN
doa10Δ(H)/WT(L) Rep1	INFGIEKAK	9	2	GlyGly (K)	_INFGIEKAK(gl)_	INFGIEK(0.233)AK(0.767)		INFGIEK(-5.18)AK(5.18)		0	1	0	1	P00549	P00549	P00549	CDC19	Pyruvate kinase 1	MULTI-MSMS		567.322	2	567.319	1132.62	77371.6	5.52	0.0031316	0.014786	8.39e-06	5.5348	0.00314	567.319	575.333	36.899	0.95391	38.932	38.496	39.45	2.0331					460	110	7	0	0	0
doa10Δ(H)/WT(L) Rep1	KGDTYVSIQGFK	12	2	Unmodified	_KGDTYVSIQGFK_					0	0	0	1	P00549	P00549	P00549	CDC19	Pyruvate kinase 1	MULTI-MSMS		448.24	3	448.238	1341.69	89589.5	5.2665	0.0023607	-0.038596	-1.73e-05	5.228	0.0023434	448.238	453.581	46.602	0.79935	48.636	48.231	49.031	2.0333					477	84	8	0	0	0
doa10Δ(H)/WT(L) Rep1	KGDTYVSIQGFK	12	2	Unmodified	_KGDTYVSIQGFK_					0	0	0	1	P00549	P00549	P00549	CDC19	Pyruvate kinase 1	MULTI-MSMS		671.857	2	671.854	1341.69	72965.7	5.4213	0.0036423	0.69253	0.00046528	6.1138	0.0041076	671.854	679.868	46.615	0.55879	48.648	48.313	48.872	2.0333					205	59	5	0	0	0
doa10Δ(H)/WT(L) Rep1	KSEELYPGRPLAIALDTK	18	2	Unmodified	_KSEELYPGRPLAIALDTK_					0	0	0	2	P00549	P00549	P00549	CDC19	Pyruvate kinase 1	MULTI-MSMS		501.284	4	501.031	2000.09	83784.8	5.4857	0.0027485	0.1634	8.19e-05	5.6491	0.0028304	501.031	505.289	59.709	0.96402	61.743	61.405	62.369	2.0333					365	102	9	0	0	0
doa10Δ(H)/WT(L) Rep1	KSEELYPGRPLAIALDTK	18	2	Unmodified	_KSEELYPGRPLAIALDTK_					0	0	0	2	P00549	P00549	P00549	CDC19	Pyruvate kinase 1	MULTI-MSMS		673.053	3	667.705	2000.09	72759.4	5.8006	0.0038731	0.17983	0.00012007	5.9805	0.0039932	667.706	673.382	59.669	0.39259	61.703	61.405	61.798	2.0333					196	42	7	0	0	0
doa10Δ(H)/WT(L) Rep1	KSEELYPGRPLAIALDTK	18	2	Unmodified	_KSEELYPGRPLAIALDTK_					0	0	0	2	P00549	P00549	P00549	CDC19	Pyruvate kinase 1	MULTI-MSMS		668.044	3	667.705	2000.09	73105.5	5.7076	0.003811	0.5414	0.0003615	6.249	0.0041725	668.04	673.049	59.883	0.81489	61.917	61.735	62.549	2.0333					414	84	8	0	0	0
doa10Δ(H)/WT(L) Rep1	LTSLNVVAGSDLR	13	0	Unmodified	_LTSLNVVAGSDLR_					0	0	0	0	P00549	P00549	P00549	CDC19	Pyruvate kinase 1	ISO-MSMS	-1	672.883	2	672.878	1343.74	NaN	NaN	NaN	1.0168	0.00068421	NaN	NaN	NaN	NaN	57.191	0.087173	59.224	59.154	59.241	2.0333								0	0	0
doa10Δ(H)/WT(L) Rep1	LTSLNVVAGSDLR	13	0	Unmodified	_LTSLNVVAGSDLR_					0	0	0	0	P00549	P00549	P00549	CDC19	Pyruvate kinase 1	ISO-MSMS	-1	672.882	2	672.878	1343.74	NaN	NaN	NaN	0.30022	0.00020201	NaN	NaN	NaN	NaN	57.525	0.99793	59.558	59.241	60.239	2.0333								0	0	0
doa10Δ(H)/WT(L) Rep1	LTSLNVVAGSDLR	13	0	Unmodified	_LTSLNVVAGSDLR_					0	0	0	0	P00549	P00549	P00549	CDC19	Pyruvate kinase 1	ISO-MSMS	-1	448.923	3	448.921	1343.74	NaN	NaN	NaN	-0.052238	-2.35e-05	NaN	NaN	NaN	NaN	57.589	0.35245	59.623	59.367	59.719	2.0333								0	0	0
doa10Δ(H)/WT(L) Rep1	LTSLNVVAGSDLR	13	0	Unmodified	_LTSLNVVAGSDLR_					0	0	0	0	P00549	P00549	P00549	CDC19	Pyruvate kinase 1	ISO-MSMS	-1	672.881	2	672.878	1343.74	NaN	NaN	NaN	0.15441	0.0001039	NaN	NaN	NaN	NaN	58.267	0.34058	60.301	60.248	60.588	2.0333								0	0	0
doa10Δ(H)/WT(L) Rep1	LTSLNVVAGSDLRR	14	0	Unmodified	_LTSLNVVAGSDLRR_					0	0	0	1	P00549	P00549	P00549	CDC19	Pyruvate kinase 1	ISO-MSMS	-1	500.956	3	500.955	1499.84	NaN	NaN	NaN	-0.97515	-0.0004885	NaN	NaN	NaN	NaN	48.135	0.27235	50.269	50.181	50.453	2.1335								0	0	0
doa10Δ(H)/WT(L) Rep1	LVSKYRPNCPIILVTR	16	1	GlyGly (K)	_LVSK(gl)YRPNCPIILVTR_					0	1	0	2	P00549	P00549	P00549	CDC19	Pyruvate kinase 1	MULTI-MATCH			4	511.544	2042.15	96213.3	5.0901	0.0026038	-0.5891	-0.00030135	4.501	0.0023024	511.544	513.547	50.212	0.033371	52.346	52.329	52.362	2.1335	0.27029	-0.0015261	NaN	48.899	10	3	4	NaN	NaN	NaN
doa10Δ(H)/WT(L) Rep1	MNFSHGSYEYHK	12	1	Unmodified	_MNFSHGSYEYHK_					0	0	0	0	P00549	P00549	P00549	CDC19	Pyruvate kinase 1	MULTI-MSMS		503.558	3	500.551	1498.63	85437.8	5.2847	0.0026452	0.15899	7.96e-05	5.4436	0.0027248	500.885	503.222	28.106	0.79672	30.039	29.345	30.142	1.9329					363	88	6	0	0	0
doa10Δ(H)/WT(L) Rep1	MNFSHGSYEYHK	12	1	Unmodified	_MNFSHGSYEYHK_					0	0	0	0	P00549	P00549	P00549	CDC19	Pyruvate kinase 1	MSMS	0	500.553	3	500.551	1498.63	NaN	NaN	NaN	NaN	NaN	NaN	NaN	NaN	NaN	27.687	1	29.62	29.12	30.12	1.9329								0	0	0
doa10Δ(H)/WT(L) Rep1	MNFSHGSYEYHK	12	1	Unmodified	_MNFSHGSYEYHK_					0	0	0	0	P00549	P00549	P00549	CDC19	Pyruvate kinase 1	MSMS	0	500.553	3	500.551	1498.63	NaN	NaN	NaN	NaN	NaN	NaN	NaN	NaN	NaN	28.104	1	30.037	29.537	30.537	1.9329								0	0	0
doa10Δ(H)/WT(L) Rep1	MNFSHGSYEYHK	12	1	Unmodified	_MNFSHGSYEYHK_					0	0	0	0	P00549	P00549	P00549	CDC19	Pyruvate kinase 1	MULTI-MATCH			3	500.551	1498.63	84591.9	5.3427	0.0026743	-0.38334	-0.00019188	4.9594	0.0024824	500.55	503.222	28.574	0.35736	30.507	30.305	30.662	1.9329	0.1454	-0.00018354	NaN	70.089	204	36	8	NaN	NaN	NaN
doa10Δ(H)/WT(L) Rep1	MNFSHGSYEYHK	12	1	Unmodified	_MNFSHGSYEYHK_					0	0	0	0	P00549	P00549	P00549	CDC19	Pyruvate kinase 1	MULTI-MATCH			3	500.551	1498.63	84591.9	5.2882	0.002647	-0.31133	-0.00015584	4.9769	0.0024912	500.55	503.222	28.253	0.23119	30.186	30.102	30.333	1.9329	0.11812	-0.00029985	NaN	78.903	158	26	8	NaN	NaN	NaN
doa10Δ(H)/WT(L) Rep1	NCTPKPTSTTETVAASAVAAVFEQK	25	2	Unmodified	_NCTPKPTSTTETVAASAVAAVFEQK_					0	0	0	1	P00549	P00549	P00549	CDC19	Pyruvate kinase 1	MULTI-MSMS		875.785	3	870.102	2607.29	63322.2	5.9788	0.0052022	-0.29365	-0.00025551	5.6852	0.0049467	870.437	875.779	80.45	1.1069	82.683	82.097	83.204	2.2335					820	117	11	0	0	0
doa10Δ(H)/WT(L) Rep1	NGVHMVFASFIR	12	0	Oxidation (M)	_NGVHM(ox)VFASFIR_		NGVHM(1)VFASFIR		NGVHM(108.68)VFASFIR	0	0	1	0	P00549	P00549	P00549	CDC19	Pyruvate kinase 1	ISO-MSMS	-1	465.243	3	465.24	1392.7	NaN	NaN	NaN	-0.28415	-0.0001322	NaN	NaN	NaN	NaN	60.789	0.7905	62.923	62.263	63.054	2.1335								0	0	0
doa10Δ(H)/WT(L) Rep1	NGVHMVFASFIR	12	0	Oxidation (M)	_NGVHM(ox)VFASFIR_		NGVHM(1)VFASFIR		NGVHM(84.35)VFASFIR	0	0	1	0	P00549	P00549	P00549	CDC19	Pyruvate kinase 1	ISO-MSMS	-1	697.359	2	697.356	1392.7	NaN	NaN	NaN	-0.025839	-1.8e-05	NaN	NaN	NaN	NaN	60.791	0.66642	62.925	62.388	63.054	2.1335								0	0	0
doa10Δ(H)/WT(L) Rep1	NGVHMVFASFIR	12	0	Oxidation (M)	_NGVHM(ox)VFASFIR_		NGVHM(1)VFASFIR		NGVHM(92.11)VFASFIR	0	0	1	0	P00549	P00549	P00549	CDC19	Pyruvate kinase 1	ISO-MSMS	-1	465.242	3	465.24	1392.7	NaN	NaN	NaN	-0.027876	-1.3e-05	NaN	NaN	NaN	NaN	60.969	1.6709	63.102	63.054	64.725	2.1335								0	0	0
doa10Δ(H)/WT(L) Rep1	NGVHMVFASFIR	12	0	Oxidation (M)	_NGVHM(ox)VFASFIR_		NGVHM(1)VFASFIR		NGVHM(76.24)VFASFIR	0	0	1	0	P00549	P00549	P00549	CDC19	Pyruvate kinase 1	ISO-MSMS	-1	697.359	2	697.356	1392.7	NaN	NaN	NaN	0.10385	7.24e-05	NaN	NaN	NaN	NaN	60.964	1.2856	63.098	62.965	64.25	2.1335								0	0	0
doa10Δ(H)/WT(L) Rep1	NGVHMVFASFIR	12	0	Oxidation (M)	_NGVHM(ox)VFASFIR_		NGVHM(1)VFASFIR		NGVHM(44.37)VFASFIR	0	0	1	0	P00549	P00549	P00549	CDC19	Pyruvate kinase 1	ISO-MSMS	-1	465.243	3	465.24	1392.7	NaN	NaN	NaN	-0.27223	-0.00012665	NaN	NaN	NaN	NaN	66.607	0.32443	68.74	68.543	68.868	2.1334								0	0	0
doa10Δ(H)/WT(L) Rep1	NGVHMVFASFIR	12	0	Oxidation (M)	_NGVHM(ox)VFASFIR_		NGVHM(1)VFASFIR		NGVHM(53.45)VFASFIR	0	0	1	0	P00549	P00549	P00549	CDC19	Pyruvate kinase 1	ISO-MSMS	-1	465.242	3	465.24	1392.7	NaN	NaN	NaN	-0.31864	-0.00014824	NaN	NaN	NaN	NaN	70.806	0.21274	72.94	72.81	73.023	2.1334								0	0	0
doa10Δ(H)/WT(L) Rep1	NGVHMVFASFIR	12	0	Unmodified	_NGVHMVFASFIR_					0	0	0	0	P00549	P00549	P00549	CDC19	Pyruvate kinase 1	ISO-MSMS	-1	459.91	3	459.908	1376.7	NaN	NaN	NaN	0.13258	6.1e-05	NaN	NaN	NaN	NaN	70.792	0.40878	72.926	72.701	73.11	2.1334								0	0	0
doa10Δ(H)/WT(L) Rep1	NGVHMVFASFIR	12	0	Unmodified	_NGVHMVFASFIR_					0	0	0	0	P00549	P00549	P00549	CDC19	Pyruvate kinase 1	ISO-MSMS	-1	459.911	3	459.908	1376.7	NaN	NaN	NaN	-0.40801	-0.00018765	NaN	NaN	NaN	NaN	71.047	0.20247	73.18	73.127	73.329	2.1334								0	0	0
doa10Δ(H)/WT(L) Rep1	NGVHMVFASFIR	12	0	Unmodified	_NGVHMVFASFIR_					0	0	0	0	P00549	P00549	P00549	CDC19	Pyruvate kinase 1	ISO-MSMS	-1	459.91	3	459.908	1376.7	NaN	NaN	NaN	-0.18242	-8.39e-05	NaN	NaN	NaN	NaN	71.908	0.74358	74.042	73.32	74.063	2.1334								0	0	0
doa10Δ(H)/WT(L) Rep1	NGVHMVFASFIR	12	0	Unmodified	_NGVHMVFASFIR_					0	0	0	0	P00549	P00549	P00549	CDC19	Pyruvate kinase 1	ISO-MSMS	-1	689.362	2	689.358	1376.7	NaN	NaN	NaN	-0.088328	-6.09e-05	NaN	NaN	NaN	NaN	72.011	2.5079	74.145	73.445	75.953	2.1334								0	0	0
doa10Δ(H)/WT(L) Rep1	NGVHMVFASFIR	12	0	Unmodified	_NGVHMVFASFIR_					0	0	0	0	P00549	P00549	P00549	CDC19	Pyruvate kinase 1	ISO-MSMS	-1	459.911	3	459.908	1376.7	NaN	NaN	NaN	-0.22005	-0.0001012	NaN	NaN	NaN	NaN	72.264	2.0918	74.398	74.22	76.312	2.1334								0	0	0
doa10Δ(H)/WT(L) Rep1	NGVHMVFASFIR	12	0	Unmodified	_NGVHMVFASFIR_					0	0	0	0	P00549	P00549	P00549	CDC19	Pyruvate kinase 1	ISO-MSMS	-1	459.91	3	459.908	1376.7	NaN	NaN	NaN	0.060827	2.8e-05	NaN	NaN	NaN	NaN	74.266	0.27048	76.499	76.403	76.674	2.2335								0	0	0
doa10Δ(H)/WT(L) Rep1	NGVHMVFASFIR	12	0	Unmodified	_NGVHMVFASFIR_					0	0	0	0	P00549	P00549	P00549	CDC19	Pyruvate kinase 1	ISO-MSMS	-1	459.911	3	459.908	1376.7	NaN	NaN	NaN	-0.39309	-0.00018078	NaN	NaN	NaN	NaN	74.484	0.90018	76.718	76.664	77.564	2.2335								0	0	0
doa10Δ(H)/WT(L) Rep1	NGVHMVFASFIR	12	0	Unmodified	_NGVHMVFASFIR_					0	0	0	0	P00549	P00549	P00549	CDC19	Pyruvate kinase 1	ISO-MSMS	-1	689.363	2	689.358	1376.7	NaN	NaN	NaN	1.5533	0.0010708	NaN	NaN	NaN	NaN	74.48	0.51307	76.714	76.664	77.177	2.2335								0	0	0
doa10Δ(H)/WT(L) Rep1	NGVHMVFASFIR	12	0	Unmodified	_NGVHMVFASFIR_					0	0	0	0	P00549	P00549	P00549	CDC19	Pyruvate kinase 1	ISO-MSMS	-1	459.91	3	459.908	1376.7	NaN	NaN	NaN	-0.033816	-1.56e-05	NaN	NaN	NaN	NaN	75.73	0.82589	77.963	77.564	78.39	2.2335								0	0	0
doa10Δ(H)/WT(L) Rep1	NGVHMVFASFIR	12	0	Unmodified	_NGVHMVFASFIR_					0	0	0	0	P00549	P00549	P00549	CDC19	Pyruvate kinase 1	ISO-MSMS	-1	459.91	3	459.908	1376.7	NaN	NaN	NaN	-0.12486	-5.74e-05	NaN	NaN	NaN	NaN	76.233	0.41306	78.467	78.39	78.803	2.2335								0	0	0
doa10Δ(H)/WT(L) Rep1	NGVHMVFASFIR	12	0	Unmodified	_NGVHMVFASFIR_					0	0	0	0	P00549	P00549	P00549	CDC19	Pyruvate kinase 1	ISO-MSMS	-1	459.911	3	459.908	1376.7	NaN	NaN	NaN	-0.07726	-3.55e-05	NaN	NaN	NaN	NaN	76.905	0.64365	79.139	78.722	79.366	2.2335								0	0	0
doa10Δ(H)/WT(L) Rep1	NGVHMVFASFIR	12	0	Unmodified	_NGVHMVFASFIR_					0	0	0	0	P00549	P00549	P00549	CDC19	Pyruvate kinase 1	ISO-MSMS	-1	689.862	2	689.358	1376.7	NaN	NaN	NaN	-0.48583	-0.00033491	NaN	NaN	NaN	NaN	77.161	0.26762	79.395	79.178	79.446	2.2335								0	0	0
doa10Δ(H)/WT(L) Rep1	NGVHMVFASFIR	12	0	Unmodified	_NGVHMVFASFIR_					0	0	0	0	P00549	P00549	P00549	CDC19	Pyruvate kinase 1	ISO-MSMS	-1	459.91	3	459.908	1376.7	NaN	NaN	NaN	0.20441	9.4e-05	NaN	NaN	NaN	NaN	77.15	0.44292	79.384	79.243	79.686	2.2335								0	0	0
doa10Δ(H)/WT(L) Rep1	NGVHMVFASFIR	12	0	Unmodified	_NGVHMVFASFIR_					0	0	0	0	P00549	P00549	P00549	CDC19	Pyruvate kinase 1	ISO-MSMS	-1	459.91	3	459.908	1376.7	NaN	NaN	NaN	-0.42442	-0.00019519	NaN	NaN	NaN	NaN	79.221	0.69341	81.454	80.973	81.666	2.2335								0	0	0
doa10Δ(H)/WT(L) Rep1	NGVHMVFASFIR	12	0	Unmodified	_NGVHMVFASFIR_					0	0	0	0	P00549	P00549	P00549	CDC19	Pyruvate kinase 1	ISO-MSMS	-1	459.911	3	459.908	1376.7	NaN	NaN	NaN	-0.46017	-0.00021163	NaN	NaN	NaN	NaN	79.581	0.42	81.814	81.649	82.069	2.2335								0	0	0
doa10Δ(H)/WT(L) Rep1	NGVHMVFASFIR	12	0	Unmodified	_NGVHMVFASFIR_					0	0	0	0	P00549	P00549	P00549	CDC19	Pyruvate kinase 1	ISO-MSMS	-1	459.911	3	459.908	1376.7	NaN	NaN	NaN	-0.29348	-0.00013497	NaN	NaN	NaN	NaN	79.949	0.52279	82.182	81.883	82.406	2.2335								0	0	0
doa10Δ(H)/WT(L) Rep1	NGVHMVFASFIR	12	0	Unmodified	_NGVHMVFASFIR_					0	0	0	0	P00549	P00549	P00549	CDC19	Pyruvate kinase 1	ISO-MSMS	-1	459.911	3	459.908	1376.7	NaN	NaN	NaN	-0.13819	-6.36e-05	NaN	NaN	NaN	NaN	80.418	0.90607	82.651	82.361	83.268	2.2335								0	0	0
doa10Δ(H)/WT(L) Rep1	NGVHMVFASFIR	12	0	Unmodified	_NGVHMVFASFIR_					0	0	0	0	P00549	P00549	P00549	CDC19	Pyruvate kinase 1	ISO-MSMS	-1	459.911	3	459.908	1376.7	NaN	NaN	NaN	-0.23988	-0.00011032	NaN	NaN	NaN	NaN	81.452	0.43299	83.686	83.5	83.933	2.2335								0	0	0
doa10Δ(H)/WT(L) Rep1	NGVHMVFASFIR	12	0	Unmodified	_NGVHMVFASFIR_					0	0	0	0	P00549	P00549	P00549	CDC19	Pyruvate kinase 1	ISO-MSMS	-1	459.91	3	459.908	1376.7	NaN	NaN	NaN	-0.57588	-0.00026485	NaN	NaN	NaN	NaN	81.876	0.47063	84.11	83.892	84.362	2.2335								0	0	0
doa10Δ(H)/WT(L) Rep1	NGVHMVFASFIR	12	0	Unmodified	_NGVHMVFASFIR_					0	0	0	0	P00549	P00549	P00549	CDC19	Pyruvate kinase 1	ISO-MSMS	-1	459.91	3	459.908	1376.7	NaN	NaN	NaN	-0.53932	-0.00024804	NaN	NaN	NaN	NaN	82.34	0.17755	84.573	84.498	84.676	2.2335								0	0	0
doa10Δ(H)/WT(L) Rep1	NGVHMVFASFIR	12	0	Unmodified	_NGVHMVFASFIR_					0	0	0	0	P00549	P00549	P00549	CDC19	Pyruvate kinase 1	ISO-MSMS	-1	459.91	3	459.908	1376.7	NaN	NaN	NaN	-0.51677	-0.00023766	NaN	NaN	NaN	NaN	82.729	0.2696	84.963	84.801	85.07	2.2335								0	0	0
doa10Δ(H)/WT(L) Rep1	NGVHMVFASFIR	12	0	Unmodified	_NGVHMVFASFIR_					0	0	0	0	P00549	P00549	P00549	CDC19	Pyruvate kinase 1	ISO-MSMS	-1	459.911	3	459.908	1376.7	NaN	NaN	NaN	0.3009	0.00013838	NaN	NaN	NaN	NaN	84.547	0.56757	86.781	86.467	87.035	2.2335								0	0	0
doa10Δ(H)/WT(L) Rep1	NGVHMVFASFIR	12	0	Unmodified	_NGVHMVFASFIR_					0	0	0	0	P00549	P00549	P00549	CDC19	Pyruvate kinase 1	ISO-MSMS	-1	459.91	3	459.908	1376.7	NaN	NaN	NaN	0.59355	0.00027298	NaN	NaN	NaN	NaN	85.498	0.41232	87.731	87.422	87.834	2.2335								0	0	0
doa10Δ(H)/WT(L) Rep1	NGVHMVFASFIR	12	0	Unmodified	_NGVHMVFASFIR_					0	0	0	0	P00549	P00549	P00549	CDC19	Pyruvate kinase 1	ISO-MSMS	-1	459.91	3	459.908	1376.7	NaN	NaN	NaN	-0.091382	-4.2e-05	NaN	NaN	NaN	NaN	86.086	0.2728	88.319	88.154	88.427	2.2335								0	0	0
doa10Δ(H)/WT(L) Rep1	NGVHMVFASFIR	12	0	Unmodified	_NGVHMVFASFIR_					0	0	0	0	P00549	P00549	P00549	CDC19	Pyruvate kinase 1	ISO-MSMS	-1	459.91	3	459.908	1376.7	NaN	NaN	NaN	0.035646	1.64e-05	NaN	NaN	NaN	NaN	87.77	0.26675	89.903	89.804	90.071	2.1332								0	0	0
doa10Δ(H)/WT(L) Rep1	NGVHMVFASFIR	12	0	Unmodified	_NGVHMVFASFIR_					0	0	0	0	P00549	P00549	P00549	CDC19	Pyruvate kinase 1	ISO-MSMS	-1	459.911	3	459.908	1376.7	NaN	NaN	NaN	0.62521	0.00028754	NaN	NaN	NaN	NaN	88.661	0.27225	90.794	90.58	90.852	2.1332								0	0	0
doa10Δ(H)/WT(L) Rep1	NGVHMVFASFIR	12	0	Unmodified	_NGVHMVFASFIR_					0	0	0	0	P00549	P00549	P00549	CDC19	Pyruvate kinase 1	ISO-MSMS	-1	459.911	3	459.908	1376.7	NaN	NaN	NaN	0.38243	0.00017588	NaN	NaN	NaN	NaN	89.017	0.2889	91.15	91.003	91.292	2.1332								0	0	0
doa10Δ(H)/WT(L) Rep1	NGVHMVFASFIR	12	0	Unmodified	_NGVHMVFASFIR_					0	0	0	0	P00549	P00549	P00549	CDC19	Pyruvate kinase 1	ISO-MSMS	-1	459.91	3	459.908	1376.7	NaN	NaN	NaN	0.1464	6.73e-05	NaN	NaN	NaN	NaN	89.382	0.43596	91.516	91.267	91.703	2.1332								0	0	0
doa10Δ(H)/WT(L) Rep1	NGVHMVFASFIR	12	0	Unmodified	_NGVHMVFASFIR_					0	0	0	0	P00549	P00549	P00549	CDC19	Pyruvate kinase 1	ISO-MSMS	-1	459.911	3	459.908	1376.7	NaN	NaN	NaN	0.28954	0.00013316	NaN	NaN	NaN	NaN	90.165	0.63623	92.298	92.092	92.728	2.1332								0	0	0
doa10Δ(H)/WT(L) Rep1	NGVHMVFASFIR	12	0	Unmodified	_NGVHMVFASFIR_					0	0	0	0	P00549	P00549	P00549	CDC19	Pyruvate kinase 1	ISO-MSMS	-1	459.911	3	459.908	1376.7	NaN	NaN	NaN	0.03303	1.52e-05	NaN	NaN	NaN	NaN	90.818	0.70952	92.951	92.728	93.437	2.1332								0	0	0
doa10Δ(H)/WT(L) Rep1	NGVHMVFASFIR	12	0	Unmodified	_NGVHMVFASFIR_					0	0	0	0	P00549	P00549	P00549	CDC19	Pyruvate kinase 1	ISO-MSMS	-1	459.911	3	459.908	1376.7	NaN	NaN	NaN	0.19762	9.09e-05	NaN	NaN	NaN	NaN	91.658	0.54877	93.791	93.359	93.908	2.1332								0	0	0
doa10Δ(H)/WT(L) Rep1	NGVHMVFASFIR	12	0	Unmodified	_NGVHMVFASFIR_					0	0	0	0	P00549	P00549	P00549	CDC19	Pyruvate kinase 1	ISO-MSMS	-1	459.91	3	459.908	1376.7	NaN	NaN	NaN	0.44485	0.00020459	NaN	NaN	NaN	NaN	91.82	0.42908	93.954	93.883	94.312	2.1332								0	0	0
doa10Δ(H)/WT(L) Rep1	NGVHMVFASFIR	12	0	Unmodified	_NGVHMVFASFIR_					0	0	0	0	P00549	P00549	P00549	CDC19	Pyruvate kinase 1	ISO-MSMS	-1	459.91	3	459.908	1376.7	NaN	NaN	NaN	-0.29311	-0.0001348	NaN	NaN	NaN	NaN	92.648	0.62246	94.781	94.525	95.148	2.1332								0	0	0
doa10Δ(H)/WT(L) Rep1	NGVHMVFASFIR	12	0	Unmodified	_NGVHMVFASFIR_					0	0	0	0	P00549	P00549	P00549	CDC19	Pyruvate kinase 1	ISO-MSMS	-1	459.911	3	459.908	1376.7	NaN	NaN	NaN	0.098035	4.51e-05	NaN	NaN	NaN	NaN	94.667	0.64548	96.8	96.613	97.258	2.1332								0	0	0
doa10Δ(H)/WT(L) Rep1	NGVHMVFASFIR	12	0	Unmodified	_NGVHMVFASFIR_					0	0	0	0	P00549	P00549	P00549	CDC19	Pyruvate kinase 1	ISO-MSMS	-1	459.91	3	459.908	1376.7	NaN	NaN	NaN	-0.1644	-7.56e-05	NaN	NaN	NaN	NaN	96.221	0.67924	98.254	97.874	98.553	2.0331								0	0	0
doa10Δ(H)/WT(L) Rep1	NGVHMVFASFIR	12	0	Unmodified	_NGVHMVFASFIR_					0	0	0	0	P00549	P00549	P00549	CDC19	Pyruvate kinase 1	ISO-MSMS	-1	459.91	3	459.908	1376.7	NaN	NaN	NaN	0.26085	0.00011997	NaN	NaN	NaN	NaN	96.818	0.38821	98.951	98.756	99.144	2.1334								0	0	0
doa10Δ(H)/WT(L) Rep1	NGVHMVFASFIR	12	0	Unmodified	_NGVHMVFASFIR_					0	0	0	0	P00549	P00549	P00549	CDC19	Pyruvate kinase 1	ISO-MSMS	-1	459.91	3	459.908	1376.7	NaN	NaN	NaN	-0.059746	-2.75e-05	NaN	NaN	NaN	NaN	97.067	0.22506	99.201	99.125	99.35	2.1334								0	0	0
doa10Δ(H)/WT(L) Rep1	NGVHMVFASFIR	12	0	Unmodified	_NGVHMVFASFIR_					0	0	0	0	P00549	P00549	P00549	CDC19	Pyruvate kinase 1	ISO-MSMS	-1	459.91	3	459.908	1376.7	NaN	NaN	NaN	0.15823	7.28e-05	NaN	NaN	NaN	NaN	97.503	0.58701	99.636	99.35	99.937	2.1334								0	0	0
doa10Δ(H)/WT(L) Rep1	NGVHMVFASFIR	12	0	Unmodified	_NGVHMVFASFIR_					0	0	0	0	P00549	P00549	P00549	CDC19	Pyruvate kinase 1	ISO-MSMS	-1	459.911	3	459.908	1376.7	NaN	NaN	NaN	-0.048993	-2.25e-05	NaN	NaN	NaN	NaN	98.269	0.34518	100.4	100.21	100.56	2.1334								0	0	0
doa10Δ(H)/WT(L) Rep1	NGVHMVFASFIR	12	0	Unmodified	_NGVHMVFASFIR_					0	0	0	0	P00549	P00549	P00549	CDC19	Pyruvate kinase 1	ISO-MSMS	-1	459.911	3	459.908	1376.7	NaN	NaN	NaN	0.05761	2.65e-05	NaN	NaN	NaN	NaN	99.266	0.31081	101.4	101.21	101.52	2.1334								0	0	0
doa10Δ(H)/WT(L) Rep1	NGVHMVFASFIR	12	0	Unmodified	_NGVHMVFASFIR_					0	0	0	0	P00549	P00549	P00549	CDC19	Pyruvate kinase 1	ISO-MSMS	-1	459.91	3	459.908	1376.7	NaN	NaN	NaN	0.34294	0.00015772	NaN	NaN	NaN	NaN	99.529	0.43201	101.66	101.52	101.95	2.1334								0	0	0
doa10Δ(H)/WT(L) Rep1	NGVHMVFASFIR	12	0	Unmodified	_NGVHMVFASFIR_					0	0	0	0	P00549	P00549	P00549	CDC19	Pyruvate kinase 1	ISO-MSMS	-1	459.91	3	459.908	1376.7	NaN	NaN	NaN	-0.19101	-8.78e-05	NaN	NaN	NaN	NaN	100.17	0.27885	102.2	102.06	102.33	2.0331								0	0	0
doa10Δ(H)/WT(L) Rep1	NGVHMVFASFIR	12	0	Unmodified	_NGVHMVFASFIR_					0	0	0	0	P00549	P00549	P00549	CDC19	Pyruvate kinase 1	ISO-MSMS	-1	459.91	3	459.908	1376.7	NaN	NaN	NaN	-0.14938	-6.87e-05	NaN	NaN	NaN	NaN	100.82	0.49224	102.86	102.58	103.07	2.0331								0	0	0
doa10Δ(H)/WT(L) Rep1	NGVHMVFASFIR	12	0	Unmodified	_NGVHMVFASFIR_					0	0	0	0	P00549	P00549	P00549	CDC19	Pyruvate kinase 1	ISO-MSMS	-1	459.91	3	459.908	1376.7	NaN	NaN	NaN	-0.49797	-0.00022902	NaN	NaN	NaN	NaN	101.26	0.22271	103.29	103.15	103.37	2.0331								0	0	0
doa10Δ(H)/WT(L) Rep1	NGVHMVFASFIR	12	0	Unmodified	_NGVHMVFASFIR_					0	0	0	0	P00549	P00549	P00549	CDC19	Pyruvate kinase 1	ISO-MSMS	-1	459.911	3	459.908	1376.7	NaN	NaN	NaN	-0.08862	-4.08e-05	NaN	NaN	NaN	NaN	108.14	0.32819	109.78	109.6	109.93	1.6322								0	0	0
doa10Δ(H)/WT(L) Rep1	NGVHMVFASFIR	12	0	Unmodified	_NGVHMVFASFIR_					0	0	0	0	P00549	P00549	P00549	CDC19	Pyruvate kinase 1	ISO-MSMS	-1	459.91	3	459.908	1376.7	NaN	NaN	NaN	0.2656	0.00012215	NaN	NaN	NaN	NaN	108.56	0.31284	110.19	110	110.31	1.6322								0	0	0
doa10Δ(H)/WT(L) Rep1	NGVHMVFASFIR	12	0	Unmodified	_NGVHMVFASFIR_					0	0	0	0	P00549	P00549	P00549	CDC19	Pyruvate kinase 1	ISO-MSMS	-1	459.91	3	459.908	1376.7	NaN	NaN	NaN	0.37807	0.00017388	NaN	NaN	NaN	NaN	111.24	1.2295	111.77	110.86	112.09	0.52949								0	0	0
doa10Δ(H)/WT(L) Rep1	NGVHMVFASFIR	12	0	Unmodified	_NGVHMVFASFIR_					0	0	0	0	P00549	P00549	P00549	CDC19	Pyruvate kinase 1	MSMS	-1	689.362	2	689.358	1376.7	NaN	NaN	NaN	NaN	NaN	NaN	NaN	NaN	NaN	75.839	1	78.073	77.573	78.573	2.2335								0	0	0
doa10Δ(H)/WT(L) Rep1	NGVHMVFASFIR	12	0	Unmodified	_NGVHMVFASFIR_					0	0	0	0	P00549	P00549	P00549	CDC19	Pyruvate kinase 1	MSMS	-1	459.911	3	459.908	1376.7	NaN	NaN	NaN	NaN	NaN	NaN	NaN	NaN	NaN	77.869	1	80.102	79.602	80.602	2.2335								0	0	0
doa10Δ(H)/WT(L) Rep1	NGVHMVFASFIR	12	0	Unmodified	_NGVHMVFASFIR_					0	0	0	0	P00549	P00549	P00549	CDC19	Pyruvate kinase 1	MSMS	-1	459.911	3	459.908	1376.7	NaN	NaN	NaN	NaN	NaN	NaN	NaN	NaN	NaN	78.216	1	80.449	79.949	80.949	2.2335								0	0	0
doa10Δ(H)/WT(L) Rep1	NGVHMVFASFIR	12	0	Unmodified	_NGVHMVFASFIR_					0	0	0	0	P00549	P00549	P00549	CDC19	Pyruvate kinase 1	MSMS	-1	459.91	3	459.908	1376.7	NaN	NaN	NaN	NaN	NaN	NaN	NaN	NaN	NaN	78.561	1	80.794	80.294	81.294	2.2335								0	0	0
doa10Δ(H)/WT(L) Rep1	NGVHMVFASFIR	12	0	Unmodified	_NGVHMVFASFIR_					0	0	0	0	P00549	P00549	P00549	CDC19	Pyruvate kinase 1	MSMS	-1	459.911	3	459.908	1376.7	NaN	NaN	NaN	NaN	NaN	NaN	NaN	NaN	NaN	83.119	1	85.353	84.853	85.853	2.2335								0	0	0
doa10Δ(H)/WT(L) Rep1	NGVHMVFASFIR	12	0	Unmodified	_NGVHMVFASFIR_					0	0	0	0	P00549	P00549	P00549	CDC19	Pyruvate kinase 1	MSMS	-1	459.91	3	459.908	1376.7	NaN	NaN	NaN	NaN	NaN	NaN	NaN	NaN	NaN	93.522	1	95.655	95.155	96.155	2.1332								0	0	0
doa10Δ(H)/WT(L) Rep1	NGVHMVFASFIR	12	0	Unmodified	_NGVHMVFASFIR_					0	0	0	0	P00549	P00549	P00549	CDC19	Pyruvate kinase 1	MSMS	-1	459.91	3	459.908	1376.7	NaN	NaN	NaN	NaN	NaN	NaN	NaN	NaN	NaN	95.966	1	98	97.5	98.5	2.0331								0	0	0
doa10Δ(H)/WT(L) Rep1	NGVHMVFASFIR	12	0	Unmodified	_NGVHMVFASFIR_					0	0	0	0	P00549	P00549	P00549	CDC19	Pyruvate kinase 1	MSMS	-1	459.91	3	459.908	1376.7	NaN	NaN	NaN	NaN	NaN	NaN	NaN	NaN	NaN	111.59	1	112.12	111.62	112.62	0.52949								0	0	0
doa10Δ(H)/WT(L) Rep1	RTSIIGTIGPK	11	1	Unmodified	_RTSIIGTIGPK_					0	0	0	1	P00549	P00549	P00549	CDC19	Pyruvate kinase 1	MULTI-MSMS		571.852	2	571.848	1141.68	80054.8	5.5679	0.003184	-0.17654	-0.00010096	5.3913	0.003083	571.848	575.855	36.172	0.89947	38.205	37.952	38.851	2.0331					375	93	7	0	0	0
doa10Δ(H)/WT(L) Rep1	SNLAGKPVICATQMLESMTYNPR	23	1	Unmodified	_SNLAGKPVICATQMLESMTYNPR_					0	0	0	1	P00549	P00549	P00549	CDC19	Pyruvate kinase 1	MULTI-MSMS		861.429	3	861.091	2580.25	64647.2	5.3698	0.0046239	0.24191	0.0002083	5.6117	0.0048322	861.425	864.097	85.857	0.25551	88.091	87.945	88.2	2.2335					98	27	6	0	0	0
doa10Δ(H)/WT(L) Rep1	SNLAGKPVICATQMLESMTYNPR	23	1	Unmodified	_SNLAGKPVICATQMLESMTYNPR_					0	0	0	1	P00549	P00549	P00549	CDC19	Pyruvate kinase 1	MULTI-MSMS		861.431	3	861.091	2580.25	64764.1	5.3822	0.0046346	-0.3185	-0.00027426	5.0637	0.0043603	861.425	863.762	86.212	0.69061	88.445	88.163	88.854	2.2335					290	71	7	0	0	0
doa10Δ(H)/WT(L) Rep1	SNLAGKPVICATQMLESMTYNPRPTR	26	1	Unmodified	_SNLAGKPVICATQMLESMTYNPRPTR_					0	0	0	2	P00549	P00549	P00549	CDC19	Pyruvate kinase 1	MULTI-MSMS		734.876	4	734.62	2934.45	69632.9	6.3057	0.0046323	-0.30349	-0.00022295	6.0022	0.0044093	735.121	736.874	80.39	0.90607	82.624	82.361	83.268	2.2335					408	96	9	0	0	0
doa10Δ(H)/WT(L) Rep1	SNLAGKPVICATQMLESMTYNPRPTR	26	1	Unmodified	_SNLAGKPVICATQMLESMTYNPRPTR_					0	0	0	2	P00549	P00549	P00549	CDC19	Pyruvate kinase 1	MULTI-MSMS		734.876	4	734.62	2934.45	69632.9	5.938	0.0043622	-0.25922	-0.00019043	5.6788	0.0041717	734.871	736.874	80.938	0.17642	83.171	83.091	83.268	2.2335					87	19	5	0	0	0
doa10Δ(H)/WT(L) Rep1	SNLAGKPVICATQMLESMTYNPRPTR	26	1	Unmodified	_SNLAGKPVICATQMLESMTYNPRPTR_					0	0	0	2	P00549	P00549	P00549	CDC19	Pyruvate kinase 1	MULTI-MSMS		735.377	4	734.62	2934.45	69534.4	5.7996	0.0042605	-0.24755	-0.00018185	5.5521	0.0040787	735.121	736.874	81.153	0.27791	83.386	83.258	83.536	2.2335					164	30	10	0	0	0
doa10Δ(H)/WT(L) Rep1	SNLAGKPVICATQMLESMTYNPRPTR	26	1	Unmodified	_SNLAGKPVICATQMLESMTYNPRPTR_					0	0	0	2	P00549	P00549	P00549	CDC19	Pyruvate kinase 1	MULTI-MSMS		737.129	4	734.62	2934.45	69259.7	5.7434	0.0042192	0.049109	3.61e-05	5.7925	0.0042553	735.121	737.125	81.204	0.13074	83.438	83.405	83.536	2.2335					80	14	7	0	0	0
doa10Δ(H)/WT(L) Rep1	SNLAGKPVICATQMLESMTYNPRPTR	26	1	Unmodified	_SNLAGKPVICATQMLESMTYNPRPTR_					0	0	0	2	P00549	P00549	P00549	CDC19	Pyruvate kinase 1	MULTI-MSMS		735.125	4	734.62	2934.45	69436.1	5.7472	0.004222	-0.084771	-6.23e-05	5.6625	0.0041598	734.871	736.875	81.42	0.43299	83.653	83.5	83.933	2.2335					254	48	11	0	0	0
doa10Δ(H)/WT(L) Rep1	SNLAGKPVICATQMLESMTYNPRPTR	26	1	Unmodified	_SNLAGKPVICATQMLESMTYNPRPTR_					0	0	0	2	P00549	P00549	P00549	CDC19	Pyruvate kinase 1	MULTI-MSMS		735.127	4	734.62	2934.45	69262.9	5.7701	0.0042388	0.155	0.00011387	5.9251	0.0043527	735.122	737.125	82.139	0.31804	84.372	84.19	84.508	2.2335					94	33	5	0	0	0
doa10Δ(H)/WT(L) Rep1	SNLAGKPVICATQMLESMTYNPRPTR	26	1	Unmodified	_SNLAGKPVICATQMLESMTYNPRPTR_					0	0	0	2	P00549	P00549	P00549	CDC19	Pyruvate kinase 1	MULTI-MATCH			4	734.62	2934.45	69262.9	5.7768	0.0042437	-0.03951	-2.9e-05	5.7373	0.0042147	735.372	736.874	82.386	0.27665	84.62	84.489	84.765	2.2335	0.51225	0.0010457	NaN	47.05	66	29	5	NaN	NaN	NaN
doa10Δ(H)/WT(L) Rep1	SNLAGKPVICATQMLESMTYNPRPTR	26	1	Unmodified	_SNLAGKPVICATQMLESMTYNPRPTR_					0	0	0	2	P00549	P00549	P00549	CDC19	Pyruvate kinase 1	MULTI-MATCH			4	734.62	2934.45	73346.5	5.9569	0.0043761	0.98637	0.00072461	6.9433	0.0051007	734.871	736.874	83.427	0.078568	85.66	85.632	85.71	2.2335	0.80694	0.0028084	NaN	37.817	16	7	4	NaN	NaN	NaN
doa10Δ(H)/WT(L) Rep1	SNLAGKPVICATQMLESMTYNPRPTR	26	1	Oxidation (M)	_SNLAGKPVICATQM(ox)LESMTYNPRPTR_					0	0	1	2	P00549	P00549	P00549	CDC19	Pyruvate kinase 1	MULTI-MATCH			4	738.619	2950.45	71314.2	5.7397	0.0042395	0.13229	9.77e-05	5.872	0.0043372	738.869	740.873	66.42	0.08049	68.553	68.517	68.597	2.1334	0.080525	0.00022347	NaN	79.172	14	8	4	NaN	NaN	NaN
doa10Δ(H)/WT(L) Rep1	TANDVLTIR	9	0	Unmodified	_TANDVLTIR_					0	0	0	0	P00549	P00549	P00549	CDC19	Pyruvate kinase 1	ISO-MSMS	-1	501.785	2	501.783	1001.55	NaN	NaN	NaN	-0.1227	-6.16e-05	NaN	NaN	NaN	NaN	42.384	1.1949	44.417	43.988	45.183	2.0333								0	0	0
doa10Δ(H)/WT(L) Rep1	TGTTTNDVDYPIPPNHEMIFTTDDK	25	1	Unmodified	_TGTTTNDVDYPIPPNHEMIFTTDDK_					0	0	0	0	P00549	P00549	P00549	CDC19	Pyruvate kinase 1	MULTI-MATCH			3	941.432	2821.28	63629.3	5.5393	0.0052148	-0.66565	-0.00062666	4.8736	0.0045882	942.1	944.771	68.698	0.34907	70.831	70.653	71.002	2.1334	0.32647	-0.00099399	NaN	24.411	111	38	6	NaN	NaN	NaN
doa10Δ(H)/WT(L) Rep1	TGTTTNDVDYPIPPNHEMIFTTDDK	25	1	Unmodified	_TGTTTNDVDYPIPPNHEMIFTTDDK_					0	0	0	0	P00549	P00549	P00549	CDC19	Pyruvate kinase 1	MULTI-MATCH			3	941.432	2821.28	62279	5.4553	0.0051358	-0.77338	-0.00072808	4.6819	0.0044077	941.766	944.438	68.123	0.29501	70.256	70.124	70.419	2.1334	0.49904	-0.0019702	NaN	89.462	88	30	5	NaN	NaN	NaN
doa10Δ(H)/WT(L) Rep1	TGTTTNDVDYPIPPNHEMIFTTDDK	25	1	Unmodified	_TGTTTNDVDYPIPPNHEMIFTTDDK_					0	0	0	0	P00549	P00549	P00549	CDC19	Pyruvate kinase 1	MULTI-MATCH			3	941.432	2821.28	63327.2	5.4849	0.0051636	0.13805	0.00012997	5.6229	0.0052936	941.767	944.439	68.33	0.42366	70.463	70.293	70.716	2.1334	-0.26193	0.00045251	NaN	19.411	131	43	6	NaN	NaN	NaN
doa10Δ(H)/WT(L) Rep1	TGTTTNDVDYPIPPNHEMIFTTDDKYAK	28	2	Unmodified	_TGTTTNDVDYPIPPNHEMIFTTDDKYAK_					0	0	0	1	P00549	P00549	P00549	CDC19	Pyruvate kinase 1	MULTI-MSMS		801.136	4	796.875	3183.47	67061.2	5.826	0.0046426	0.054017	4.3e-05	5.88	0.0046856	797.126	801.133	64.445	0.62598	66.578	66.22	66.846	2.1334					345	66	9	0	0	0
doa10Δ(H)/WT(L) Rep1	TGTTTNDVDYPIPPNHEMIFTTDDKYAK	28	2	Unmodified	_TGTTTNDVDYPIPPNHEMIFTTDDKYAK_					0	0	0	1	P00549	P00549	P00549	CDC19	Pyruvate kinase 1	MULTI-MSMS		797.881	4	796.875	3183.47	66789.5	5.678	0.0045247	0.20355	0.0001622	5.8816	0.0046869	797.376	801.133	65	0.39445	67.134	66.989	67.383	2.1334					197	40	10	0	0	0
doa10Δ(H)/WT(L) Rep1	TGTTTNDVDYPIPPNHEMIFTTDDKYAK	28	2	Unmodified	_TGTTTNDVDYPIPPNHEMIFTTDDKYAK_					0	0	0	1	P00549	P00549	P00549	CDC19	Pyruvate kinase 1	MULTI-MSMS		801.139	4	796.875	3183.47	67044.8	5.6087	0.0044694	0.68633	0.00054692	6.295	0.0050163	797.126	801.133	65.178	0.2928	67.311	67.244	67.536	2.1334					148	31	8	0	0	0
doa10Δ(H)/WT(L) Rep1	TGTTTNDVDYPIPPNHEMIFTTDDKYAK	28	2	Unmodified	_TGTTTNDVDYPIPPNHEMIFTTDDKYAK_					0	0	0	1	P00549	P00549	P00549	CDC19	Pyruvate kinase 1	MULTI-MSMS		801.137	4	796.875	3183.47	63925.4	5.4401	0.004335	-1.0679	-0.00085097	4.3722	0.0034841	797.625	801.134	65.583	0.055969	67.717	67.685	67.741	2.1334					18	6	6	0	0	0
doa10Δ(H)/WT(L) Rep1	TNNPETLVALR	11	0	Unmodified	_TNNPETLVALR_					0	0	0	0	P00549	P00549	P00549	CDC19	Pyruvate kinase 1	ISO-MSMS	-1	614.342	2	614.338	1226.66	NaN	NaN	NaN	-0.040685	-2.5e-05	NaN	NaN	NaN	NaN	51.956	0.82669	54.09	53.637	54.464	2.1335								0	0	0
doa10Δ(H)/WT(L) Rep1	TNNPETLVALRK	12	1	Unmodified	_TNNPETLVALRK_					0	0	0	1	P00549	P00549	P00549	CDC19	Pyruvate kinase 1	MULTI-MSMS		455.267	3	452.593	1354.76	90442	5.5698	0.0025209	-0.182	-8.24e-05	5.3878	0.0024385	452.593	455.264	39.527	1.3506	41.56	41.101	42.452	2.0333					863	146	11	0	0	0
doa10Δ(H)/WT(L) Rep1	TNNPETLVALRK	12	1	Unmodified	_TNNPETLVALRK_					0	0	0	1	P00549	P00549	P00549	CDC19	Pyruvate kinase 1	MULTI-MSMS		682.396	2	678.386	1354.76	73760.6	5.7265	0.0038848	-0.202	-0.00013703	5.5245	0.0037478	678.385	682.393	39.63	0.69713	41.663	41.321	42.019	2.0333					206	74	5	0	0	0
doa10Δ(H)/WT(L) Rep1	VTDGVMVAR	9	0	Unmodified	_VTDGVMVAR_					0	0	0	0	P00549	P00549	P00549	CDC19	Pyruvate kinase 1	ISO-MSMS	-1	474.254	2	474.253	946.491	NaN	NaN	NaN	-0.54651	-0.00025918	NaN	NaN	NaN	NaN	27.612	0.56215	29.545	29.229	29.791	1.9329								0	0	0
doa10Δ(H)/WT(L) Rep1	YRPNCPIILVTR	12	0	Unmodified	_YRPNCPIILVTR_					0	0	0	1	P00549	P00549	P00549	CDC19	Pyruvate kinase 1	ISO-MSMS	-1	501.284	3	501.282	1500.82	NaN	NaN	NaN	-0.70433	-0.00035307	NaN	NaN	NaN	NaN	49.867	0.54454	52	51.56	52.104	2.1335								0	0	0
doa10Δ(H)/WT(L) Rep1	YRPNCPIILVTR	12	0	Unmodified	_YRPNCPIILVTR_					0	0	0	1	P00549	P00549	P00549	CDC19	Pyruvate kinase 1	ISO-MSMS	-1	501.284	3	501.282	1500.82	NaN	NaN	NaN	-0.51179	-0.00025655	NaN	NaN	NaN	NaN	50.179	1.1173	52.313	51.861	52.978	2.1335								0	0	0
doa10Δ(H)/WT(L) Rep1	YRPNCPIILVTR	12	0	Unmodified	_YRPNCPIILVTR_					0	0	0	1	P00549	P00549	P00549	CDC19	Pyruvate kinase 1	ISO-MSMS	-1	501.284	3	501.282	1500.82	NaN	NaN	NaN	-0.607	-0.00030428	NaN	NaN	NaN	NaN	50.432	0.77425	52.566	52.527	53.301	2.1335								0	0	0
doa10Δ(H)/WT(L) Rep1	MALPPCHIFSQFYVSFPK	18	1	Unmodified	_MALPPCHIFSQFYVSFPK_					0	0	0	0	P06785	P06785	P06785	CDC21	Thymidylate synthase	MULTI-MSMS		723.696	3	723.694	2168.06	70781.9	6.2708	0.0045382	0.0090751	6.57e-06	6.2799	0.0045447	724.028	726.7	93.442	0.49523	95.576	95.182	95.677	2.1332					254	51	10	0	0	0
doa10Δ(H)/WT(L) Rep1	MALPPCHIFSQFYVSFPK	18	1	Unmodified	_MALPPCHIFSQFYVSFPK_					0	0	0	0	P06785	P06785	P06785	CDC21	Thymidylate synthase	MULTI-MSMS		726.369	3	723.694	2168.06	71040.2	6.2032	0.0044892	0.093426	6.76e-05	6.2967	0.0045569	724.028	726.365	93.622	0.32865	95.755	95.649	95.977	2.1332					235	33	9	0	0	0
doa10Δ(H)/WT(L) Rep1	MALPPCHIFSQFYVSFPK	18	1	Unmodified	_MALPPCHIFSQFYVSFPK_					0	0	0	0	P06785	P06785	P06785	CDC21	Thymidylate synthase	MULTI-MSMS		724.031	3	723.694	2168.06	71102.3	6.1242	0.004432	0.25901	0.00018744	6.3832	0.0046195	724.028	726.7	94.01	0.56544	96.144	95.977	96.543	2.1332					234	57	8	0	0	0
doa10Δ(H)/WT(L) Rep1	MALPPCHIFSQFYVSFPK	18	1	Unmodified	_MALPPCHIFSQFYVSFPK_					0	0	0	0	P06785	P06785	P06785	CDC21	Thymidylate synthase	ISO-MSMS	1	726.702	3	723.694	2168.06	NaN	NaN	NaN	-0.66879	-0.000484	NaN	NaN	NaN	NaN	93.165	0.84368	95.298	94.66	95.504	2.1332								0	0	0
doa10Δ(H)/WT(L) Rep1	MALPPCHIFSQFYVSFPK	18	1	Unmodified	_MALPPCHIFSQFYVSFPK_					0	0	0	0	P06785	P06785	P06785	CDC21	Thymidylate synthase	MSMS	0	723.696	3	723.694	2168.06	NaN	NaN	NaN	NaN	NaN	NaN	NaN	NaN	NaN	92.934	1	95.067	94.567	95.567	2.1332								0	0	0
doa10Δ(H)/WT(L) Rep1	MALPPCHIFSQFYVSFPK	18	1	Unmodified	_MALPPCHIFSQFYVSFPK_					0	0	0	0	P06785	P06785	P06785	CDC21	Thymidylate synthase	MULTI-MATCH			3	723.694	2168.06	71447.5	6.2129	0.0044963	0.54482	0.00039428	6.7578	0.0048905	724.028	726.699	92.48	0.099342	94.613	94.561	94.66	2.1332	-0.22775	0.00087743	NaN	55.011	19	10	4	NaN	NaN	NaN
doa10Δ(H)/WT(L) Rep1	QINGYVGFANLPK	13	1	Unmodified	_QINGYVGFANLPK_					0	0	0	0	P32457	P32457	P32457	CDC3	Cell division control protein 3	ISO-MSMS	0	710.887	2	710.883	1419.75	NaN	NaN	NaN	-1.2742	-0.00090583	NaN	NaN	NaN	NaN	66.568	0.46654	68.701	68.373	68.84	2.1334								0	0	0
doa10Δ(H)/WT(L) Rep1	SLKEEQVSIK	10	2	Acetyl (Protein N-term),GlyGly (K)	_(ac)SLK(gl)EEQVSIK_	SLK(1)EEQVSIK		SLK(41.3)EEQVSIK(-41.3)		1	1	0	1	P32457	P32457	P32457	CDC3	Cell division control protein 3	MULTI-MSMS		658.86	2	658.856	1315.7	73875.4	5.8224	0.0038362	-0.045254	-2.98e-05	5.7772	0.0038063	658.856	666.87	41.48	0.34767	43.513	43.304	43.652	2.0333					140	36	6	0	0	0
doa10Δ(H)/WT(L) Rep1	SLKEEQVSIKQDPEQEER	18	2	Acetyl (Protein N-term),GlyGly (K)	_(ac)SLK(gl)EEQVSIKQDPEQEER_					1	1	0	2	P32457	P32457	P32457	CDC3	Cell division control protein 3	MULTI-MATCH			3	776.715	2327.12	67131.9	5.8155	0.004517	0.091148	7.08e-05	5.9066	0.0045878	777.05	782.392	42.085	0.41402	44.118	43.942	44.356	2.0333	-0.023414	0.00019072	NaN	66.022	197	43	7	NaN	NaN	NaN
[truncated: 121,439 more rows]
[truncated: 23 more columns]
