# Supplementary figures and images for: Genetic analysis reveals functions of atypical polyubiquitin chains
Source: eLife journal article supplement (doi:10.7554/elife.42955), 2018-12-14

Figure 3-figure supplement 1

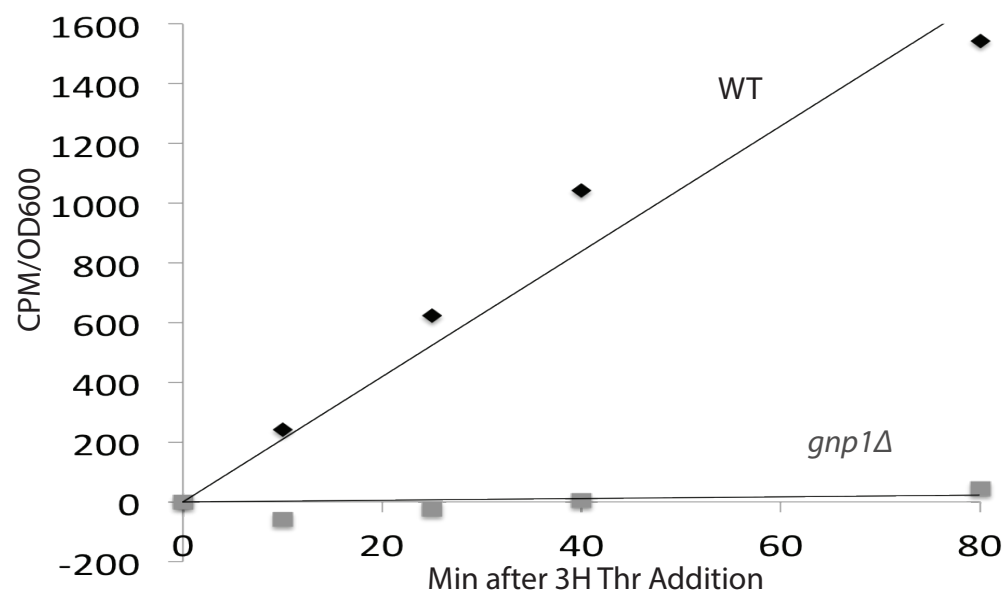

Supplement: supp [file elife-42955-supp-v1.zip › elife_poa_e42955_Figure_3_figure_supplement_1.pdf]

Figure 1-figure supplement 5

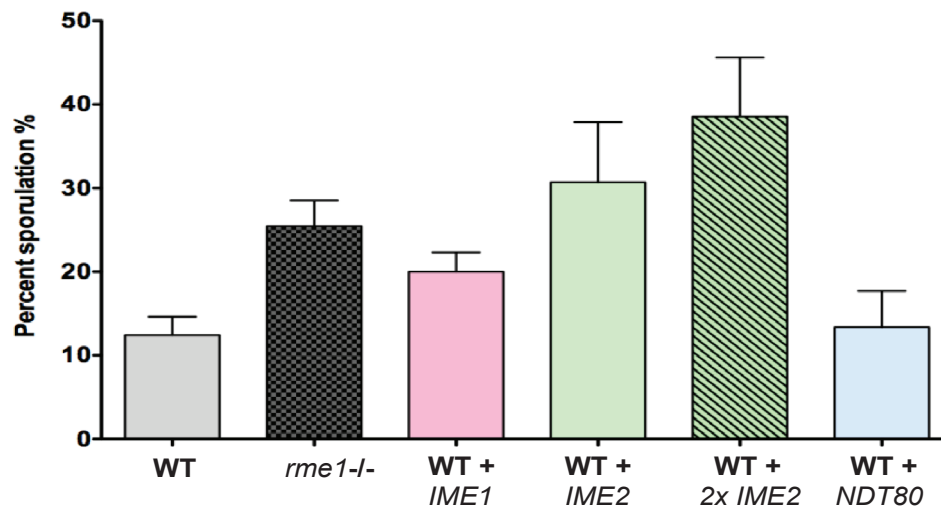

Supplement: supp [file elife-42955-supp-v1.zip › elife_poa_e42955_Figure_1_figure_supplement_5.pdf]

Figure 1-figure supplement 1

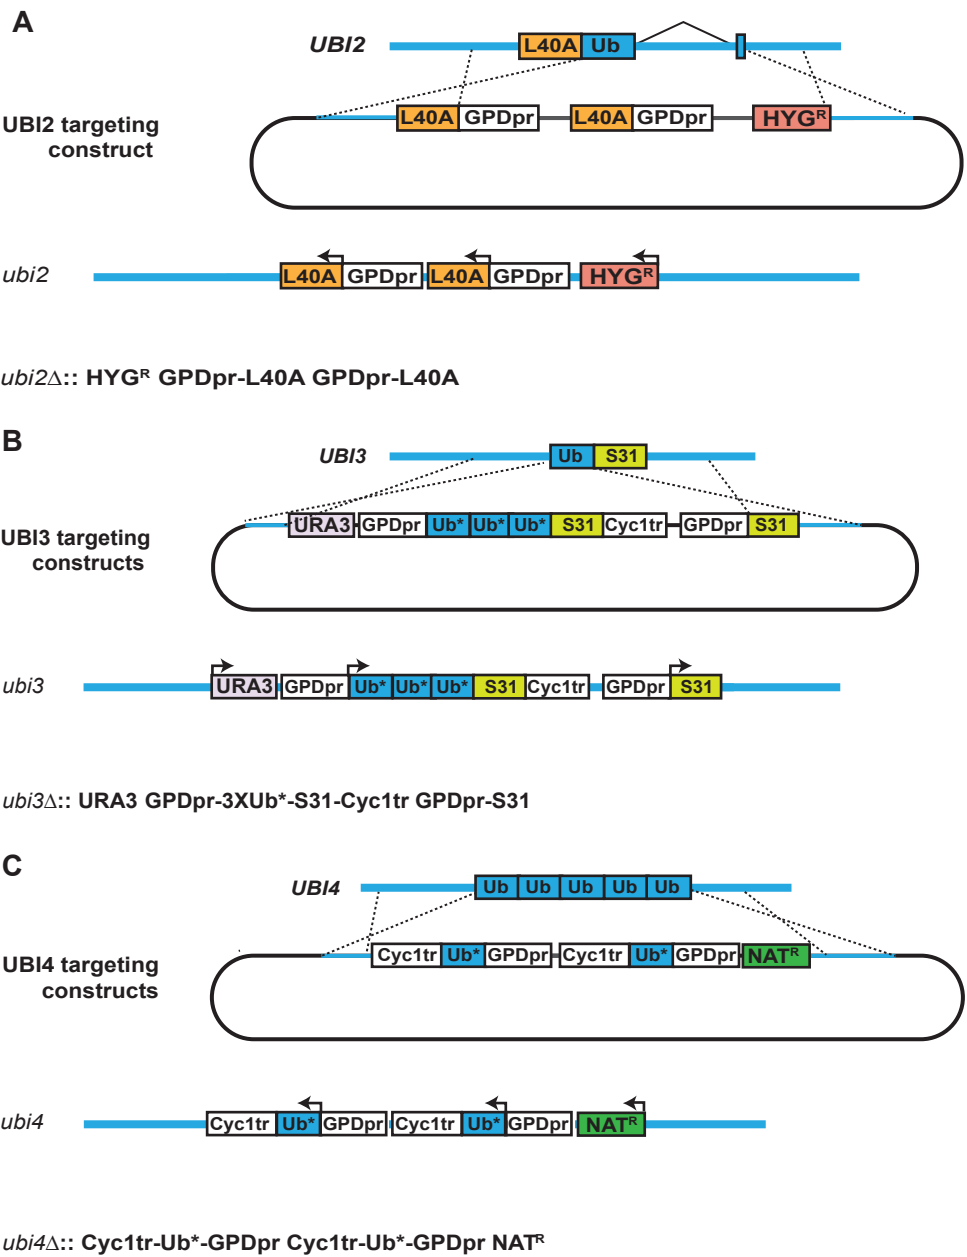

Supplement: supp [file elife-42955-supp-v1.zip › elife_poa_e42955_Figure_1_figure_supplement_1.pdf]

**Figure 4-figure supplement 1**

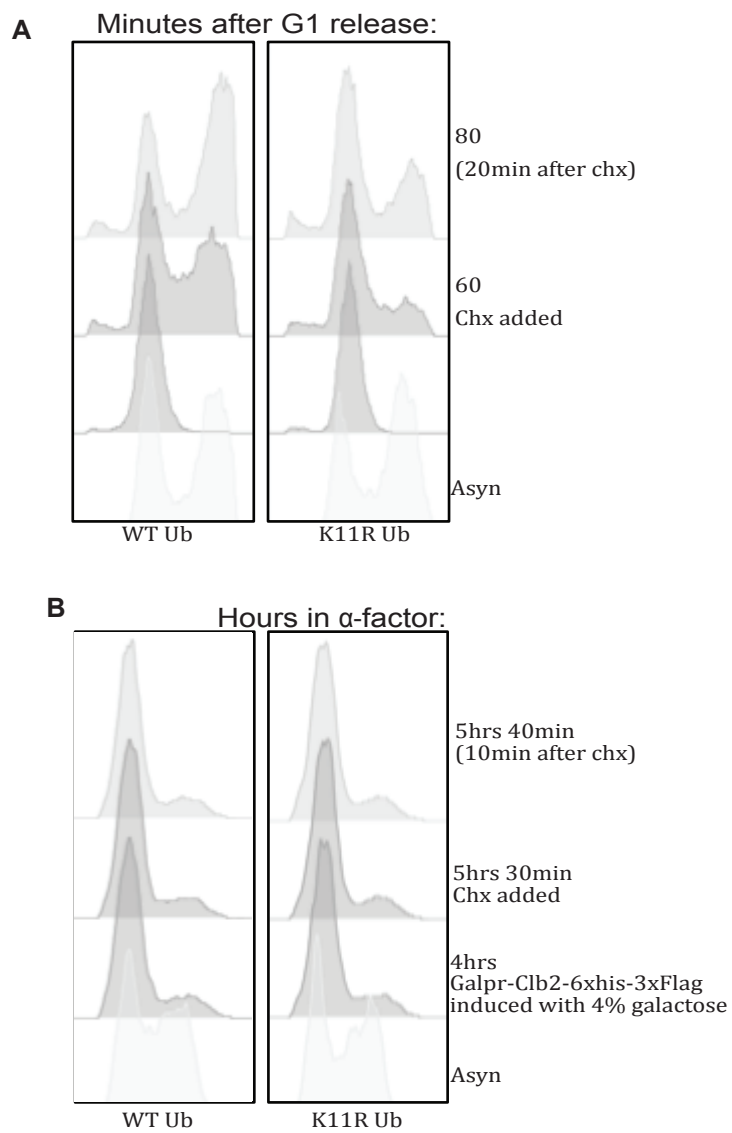

Supplement: supp [file elife-42955-supp-v1.zip › elife_poa_e42955_Figure_4_figure_supplement_1.pdf]

Figure 1-figure supplement 2

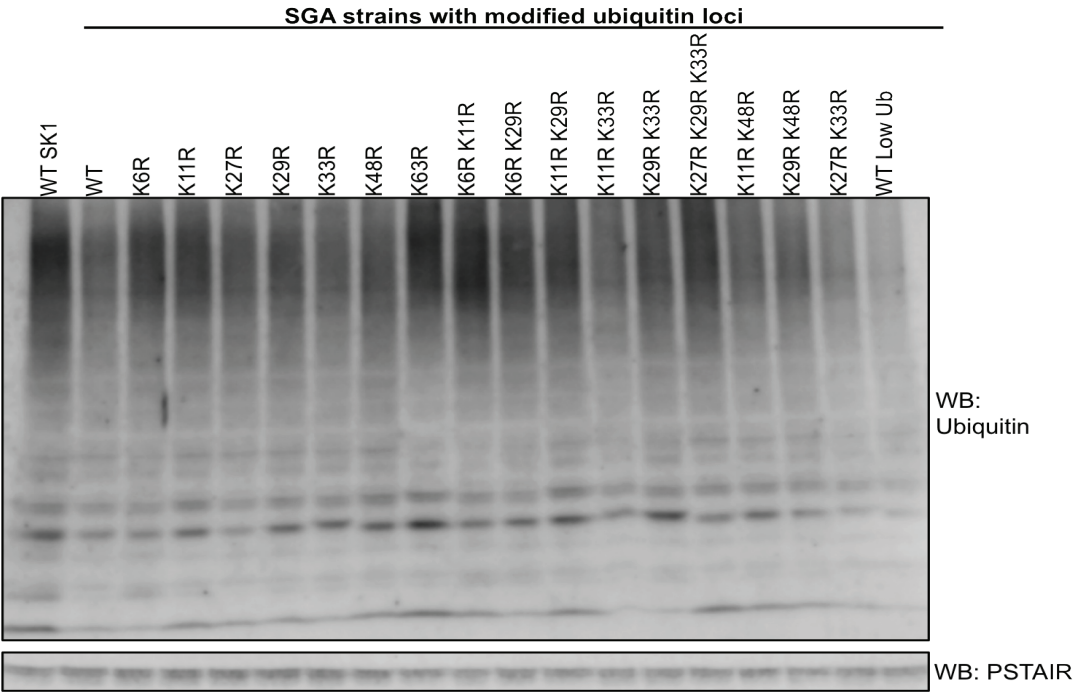

Supplement: supp [file elife-42955-supp-v1.zip › elife_poa_e42955_Figure_1_figure_supplement_2.pdf]
